# Supplementary material
Source: publisher figshare collection journal article supplement (https://acs.figshare.com/ndownloader/files/8702725)
Supplement: Supplementary file 1 [file 8702725]

data_a_a
 
_audit_creation_method            'SHELXL-2014/7'
_shelx_SHELXL_version_number      '2014/7'
_chemical_name_systematic         ?
_chemical_name_common             ?
_chemical_melting_point           ?
_chemical_formula_moiety          'C47 H82 N8 O13'
_chemical_formula_sum
 'C47 H82 N8 O13' 
_chemical_formula_weight          967.21

loop_
 _atom_type_symbol
 _atom_type_description
 _atom_type_scat_dispersion_real
 _atom_type_scat_dispersion_imag
 _atom_type_scat_source
 'C'  'C'   0.0033   0.0016
 'International Tables Vol C Tables 4.2.6.8 and 6.1.1.4'
 'H'  'H'   0.0000   0.0000
 'International Tables Vol C Tables 4.2.6.8 and 6.1.1.4'
 'N'  'N'   0.0061   0.0033
 'International Tables Vol C Tables 4.2.6.8 and 6.1.1.4'
 'O'  'O'   0.0106   0.0060
 'International Tables Vol C Tables 4.2.6.8 and 6.1.1.4'
 
_space_group_crystal_system       monoclinic
_space_group_IT_number            4
_space_group_name_H-M_alt         'P 21'
_space_group_name_Hall            'P 2yb'
 
_shelx_space_group_comment
;
The symmetry employed for this shelxl refinement is uniquely defined
by the following loop, which should always be used as a source of
symmetry information in preference to the above space-group names.
They are only intended as comments.
;
 
loop_
 _space_group_symop_operation_xyz
 'x, y, z'
 '-x, y+1/2, -z'
 
_cell_length_a                    14.885(6)
_cell_length_b                    20.472(7)
_cell_length_c                    18.004(7)
_cell_angle_alpha                 90
_cell_angle_beta                  91.102(13)
_cell_angle_gamma                 90
_cell_volume                      5485(4)
_cell_formula_units_Z             4
_cell_measurement_temperature     100(2)
_cell_measurement_reflns_used     2096
_cell_measurement_theta_min       2.25
_cell_measurement_theta_max       28.38
 
_exptl_crystal_description        'rodshape'
_exptl_crystal_colour             'colorless'
_exptl_crystal_density_meas       ?
_exptl_crystal_density_method     ?
_exptl_crystal_density_diffrn     1.171          
_exptl_crystal_F_000              2096
_exptl_transmission_factor_min    ?
_exptl_transmission_factor_max    ?
_exptl_crystal_size_max           0.24
_exptl_crystal_size_mid           0.18
_exptl_crystal_size_min           0.12
_exptl_absorpt_coefficient_mu     0.085
_shelx_estimated_absorpt_T_min    0.982
_shelx_estimated_absorpt_T_max    0.990
_exptl_absorpt_correction_type    multi-scan
_exptl_absorpt_correction_T_min   0.982
_exptl_absorpt_correction_T_max   0.990
_exptl_absorpt_process_details    'multi-scan absorption correction'
_exptl_absorpt_special_details    ?
_diffrn_ambient_temperature       100(2)
_diffrn_radiation_wavelength      0.71073
_diffrn_radiation_type            MoK\a
_diffrn_source                    'Graphite monochromator'
_diffrn_measurement_device_type   'fine-focus sealed tube'
_diffrn_measurement_method        ?
_diffrn_detector_area_resol_mean  ?
_diffrn_reflns_number             102587
_diffrn_reflns_av_unetI/netI      0.5812
_diffrn_reflns_av_R_equivalents   0.3810
_diffrn_reflns_limit_h_min        -19
_diffrn_reflns_limit_h_max        19
_diffrn_reflns_limit_k_min        -27
_diffrn_reflns_limit_k_max        27
_diffrn_reflns_limit_l_min        -24
_diffrn_reflns_limit_l_max        24
_diffrn_reflns_theta_min          1.131
_diffrn_reflns_theta_max          28.887
_diffrn_reflns_theta_full         25.242
_diffrn_measured_fraction_theta_max   0.956
_diffrn_measured_fraction_theta_full  1.000
_diffrn_reflns_Laue_measured_fraction_max    0.956
_diffrn_reflns_Laue_measured_fraction_full   1.000
_diffrn_reflns_point_group_measured_fraction_max   0.946
_diffrn_reflns_point_group_measured_fraction_full  0.999
_reflns_number_total              27312
_reflns_number_gt                 6902
_reflns_threshold_expression      'I > 2\s(I)'
_reflns_Friedel_coverage          0.926
_reflns_Friedel_fraction_max      0.935
_reflns_Friedel_fraction_full     0.997
 
_reflns_special_details
;
 Reflections were merged by SHELXL according to the crystal
 class for the calculation of statistics and refinement.
 
 _reflns_Friedel_fraction is defined as the number of unique
 Friedel pairs measured divided by the number that would be
 possible theoretically, ignoring centric projections and
 systematic absences.
;
 
_computing_data_collection        'Bruker APEX2'
_computing_cell_refinement        'Bruker SAINT'
_computing_data_reduction         'Bruker SAINT'
_computing_structure_solution     'SHELXL-2014/7 (Sheldrick, 2014)'
_computing_structure_refinement 'SHELXL-2014/7 (Sheldrick, 2014)'
_computing_molecular_graphics     'Bruker SHELXTL'
_computing_publication_material   'Bruker SHELXTL'
_refine_special_details           ?
_refine_ls_structure_factor_coef  Fsqd
_refine_ls_matrix_type            full
_refine_ls_weighting_scheme       calc
_refine_ls_weighting_details
'w=1/[\s^2^(Fo^2^)+(0.1000P)^2^+0.5604P] where P=(Fo^2^+2Fc^2^)/3'
_atom_sites_solution_primary      ?
_atom_sites_solution_secondary    ?
_atom_sites_solution_hydrogens    geom
_refine_ls_hydrogen_treatment     constr
_refine_ls_extinction_method      none
_refine_ls_extinction_coef        .
_refine_ls_abs_structure_details
;
 Flack x determined using 1759 quotients [(I+)-(I-)]/[(I+)+(I-)]
 (Parsons, Flack and Wagner, Acta Cryst. B69 (2013) 249-259).
;
_refine_ls_abs_structure_Flack    1.8(10)
_chemical_absolute_configuration  ?
_refine_ls_number_reflns          27312
_refine_ls_number_parameters      1253
_refine_ls_number_restraints      1
_refine_ls_R_factor_all           0.4006
_refine_ls_R_factor_gt            0.1140
_refine_ls_wR_factor_ref          0.3162
_refine_ls_wR_factor_gt           0.2096
_refine_ls_goodness_of_fit_ref    0.919
_refine_ls_restrained_S_all       0.919
_refine_ls_shift/su_max           0.022
_refine_ls_shift/su_mean          0.001
 
loop_
 _atom_site_label
 _atom_site_type_symbol
 _atom_site_fract_x
 _atom_site_fract_y
 _atom_site_fract_z
 _atom_site_U_iso_or_equiv
 _atom_site_adp_type
 _atom_site_occupancy
 _atom_site_site_symmetry_order  
 _atom_site_calc_flag
 _atom_site_refinement_flags_posn
 _atom_site_refinement_flags_adp
 _atom_site_refinement_flags_occupancy
 _atom_site_disorder_assembly
 _atom_site_disorder_group
O19 O 0.5609(6) 0.7614(5) -0.0694(5) 0.044(3) Uani 1 1 d . . . . .
O2 O 0.9880(6) 0.1428(4) 0.6795(5) 0.045(3) Uani 1 1 d . . . . .
O6 O 0.9392(6) 0.2376(4) 0.4302(5) 0.042(3) Uani 1 1 d . . . . .
O14 O 0.4748(7) 0.9535(5) 0.2319(6) 0.047(3) Uani 1 1 d . . . . .
O1 O 1.0252(7) 0.0461(5) 0.7332(6) 0.049(3) Uani 1 1 d . . . . .
O22 O 0.5269(6) 0.5108(4) -0.0697(5) 0.039(2) Uani 1 1 d . . . . .
O24 O 0.7518(6) 0.5138(4) -0.1441(6) 0.046(3) Uani 1 1 d . . . . .
O16 O 0.3934(6) 0.7710(4) 0.0416(6) 0.047(3) Uani 1 1 d . . . . .
O3 O 1.1054(6) 0.2285(4) 0.5421(5) 0.044(3) Uani 1 1 d . . . . .
O11 O 0.7472(7) 0.4861(5) 0.3565(6) 0.050(3) Uani 1 1 d . . . . .
O9 O 0.9730(6) 0.4887(4) 0.4303(5) 0.042(3) Uani 1 1 d . . . . .
O20 O 0.6865(7) 0.6714(5) 0.0604(6) 0.055(3) Uani 1 1 d . . . . .
O15 O 0.5116(7) 0.8566(5) 0.1792(6) 0.051(3) Uani 1 1 d . . . . .
N14 N 1.0294(7) 0.3605(5) 0.5479(6) 0.035(3) Uani 1 1 d . . . . .
H31 H 1.0414 0.3197 0.5429 0.042 Uiso 1 1 calc R U . . .
O23 O 0.8904(6) 0.7135(4) -0.2629(6) 0.052(3) Uani 1 1 d . . . . .
O8 O 0.9655(7) 0.4392(5) 0.6162(6) 0.054(3) Uani 1 1 d . . . . .
O7 O 0.8107(7) 0.3272(5) 0.5589(6) 0.055(3) Uani 1 1 d . . . . .
O21 O 0.5332(7) 0.5610(5) 0.1152(5) 0.052(3) Uani 1 1 d . . . . .
N6 N 0.4688(7) 0.6379(6) 0.0484(7) 0.039(3) Uani 1 1 d . . . . .
H8 H 0.4544 0.6784 0.0441 0.046 Uiso 1 1 calc R U . . .
N1 N 0.3737(8) 0.9032(5) 0.1659(6) 0.041(3) Uani 1 1 d . . . . .
H18 H 0.3423 0.9381 0.1711 0.049 Uiso 1 1 calc R U . . .
N12 N 0.8973(7) 0.1724(5) 0.5226(7) 0.039(3) Uani 1 1 d . . . . .
H6 H 0.9076 0.1371 0.5471 0.047 Uiso 1 1 calc R U . . .
N15 N 0.9226(7) 0.3850(5) 0.4246(6) 0.034(3) Uani 1 1 d . . . . .
H29 H 0.9277 0.3458 0.4413 0.041 Uiso 1 1 calc R U . . .
N8 N 0.7392(7) 0.5565(5) -0.0307(7) 0.037(3) Uani 1 1 d . . . . .
H70 H 0.7055 0.5781 -0.0012 0.044 Uiso 1 1 calc R U . . .
N2 N 0.4247(7) 0.8747(5) 0.0186(6) 0.036(3) Uani 1 1 d . . . . .
H30 H 0.4227 0.9149 0.0323 0.044 Uiso 1 1 calc R U . . .
N10 N 1.0748(7) 0.1248(5) 0.5189(6) 0.038(3) Uani 1 1 d . . . . .
H25 H 1.0779 0.0845 0.5322 0.046 Uiso 1 1 calc R U . . .
N4 N 0.6023(8) 0.8274(5) 0.0217(7) 0.044(3) Uani 1 1 d . . . . .
H28 H 0.5937 0.8627 0.0465 0.053 Uiso 1 1 calc R U . . .
N7 N 0.5779(7) 0.6143(5) -0.0763(6) 0.034(3) Uani 1 1 d . . . . .
H12 H 0.5729 0.6536 -0.0601 0.041 Uiso 1 1 calc R U . . .
N13 N 0.9172(8) 0.2736(5) 0.6236(7) 0.045(3) Uani 1 1 d . . . . .
H23 H 0.9417 0.2361 0.6312 0.054 Uiso 1 1 calc R U . . .
N5 N 0.5808(8) 0.7251(5) 0.1234(7) 0.042(3) Uani 1 1 d . . . . .
H24 H 0.5554 0.7623 0.1297 0.050 Uiso 1 1 calc R U . . .
O26 O 0.7356(8) 0.5084(6) 0.1073(7) 0.067(3) Uani 1 1 d . . . . .
N16 N 0.7608(7) 0.4430(5) 0.4700(7) 0.040(3) Uani 1 1 d . . . . .
H26 H 0.7941 0.4209 0.5004 0.048 Uiso 1 1 calc R U . . .
N9 N 1.1254(8) 0.0976(5) 0.6667(6) 0.043(3) Uani 1 1 d . . . . .
H22 H 1.1575 0.0632 0.6740 0.051 Uiso 1 1 calc R U . . .
O13 O 0.7639(8) 0.4906(6) 0.6063(7) 0.075(4) Uani 1 1 d . . . . .
O10 O 0.6096(6) 0.2857(5) 0.2376(6) 0.056(3) Uani 1 1 d . . . . .
N3 N 0.6521(11) 0.9882(8) -0.1749(10) 0.069(5) Uani 1 1 d . . . . .
C59 C 1.0286(9) 0.1429(6) 0.4527(8) 0.035(4) Uani 1 1 d . . . . .
H59 H 1.0710 0.1668 0.4217 0.042 Uiso 1 1 calc R U . . .
O25 O 0.8359(9) 0.4336(6) 0.0777(7) 0.089(4) Uani 1 1 d . . . . .
C73 C 0.9849(10) 0.3795(7) 0.6052(8) 0.038(4) Uani 1 1 d . . . . .
C52 C 1.0403(10) 0.0987(9) 0.6924(8) 0.045(4) Uani 1 1 d . . . . .
C5 C 0.4576(12) 0.8997(8) 0.1909(8) 0.048(4) Uani 1 1 d . . . . .
N11 N 0.8486(11) 0.0118(8) 0.3248(10) 0.075(5) Uani 1 1 d . . . . .
C87 C 0.7843(9) 0.4460(7) 0.4001(10) 0.039(4) Uani 1 1 d . . . . .
C74 C 1.0592(9) 0.4056(7) 0.4929(8) 0.038(4) Uani 1 1 d . . . . .
H74 H 1.0892 0.4425 0.5177 0.046 Uiso 1 1 calc R U . . .
C58 C 1.1122(9) 0.1700(7) 0.5589(9) 0.045(4) Uani 1 1 d . . . . .
C96 C 0.8526(8) 0.3991(6) 0.3715(8) 0.031(3) Uani 1 1 d . . . . .
H96 H 0.8792 0.4174 0.3266 0.037 Uiso 1 1 calc R U . . .
C60 C 0.9970(9) 0.0848(6) 0.4096(8) 0.038(4) Uani 1 1 d . . . . .
H60A H 1.0470 0.0549 0.4042 0.045 Uiso 1 1 calc R U . . .
H60B H 0.9513 0.0625 0.4378 0.045 Uiso 1 1 calc R U . . .
C75 C 1.1247(9) 0.3730(7) 0.4406(8) 0.039(4) Uani 1 1 d . . . . .
H75A H 1.0980 0.3322 0.4239 0.046 Uiso 1 1 calc R U . . .
H75B H 1.1301 0.4007 0.3972 0.046 Uiso 1 1 calc R U . . .
O12 O 0.6635(9) 0.5661(6) 0.5767(7) 0.089(4) Uani 1 1 d . . . . .
C32 C 0.5199(10) 0.5688(7) -0.0513(8) 0.037(4) Uani 1 1 d . . . . .
C34 C 0.6944(9) 0.6645(6) -0.1474(8) 0.038(4) Uani 1 1 d . . . . .
H34A H 0.6496 0.6957 -0.1649 0.046 Uiso 1 1 calc R U . . .
H34B H 0.7216 0.6822 -0.1023 0.046 Uiso 1 1 calc R U . . .
C61 C 0.9601(10) 0.0996(7) 0.3362(8) 0.047(4) Uani 1 1 d . . . . .
H61A H 1.0056 0.1224 0.3082 0.056 Uiso 1 1 calc R U . . .
H61B H 0.9098 0.1293 0.3417 0.056 Uiso 1 1 calc R U . . .
C79 C 0.9802(9) 0.4302(8) 0.4492(8) 0.039(4) Uani 1 1 d . . . . .
C13 C 0.5036(9) 0.9168(6) -0.0895(8) 0.040(4) Uani 1 1 d . . . . .
H13A H 0.4554 0.9483 -0.0965 0.048 Uiso 1 1 calc R U . . .
H13B H 0.5507 0.9373 -0.0597 0.048 Uiso 1 1 calc R U . . .
C12 C 0.4680(9) 0.8565(6) -0.0488(8) 0.033(3) Uani 1 1 d . . . . .
H9 H 0.4245 0.8339 -0.0813 0.039 Uiso 1 1 calc R U . . .
C33 C 0.6467(8) 0.6008(6) -0.1280(9) 0.040(4) Uani 1 1 d . . . . .
H33 H 0.6188 0.5830 -0.1734 0.048 Uiso 1 1 calc R U . . .
O18 O 0.6635(9) 1.0453(7) -0.1889(9) 0.099(5) Uani 1 1 d . . . . .
C26 C 0.5146(11) 0.6196(7) 0.1044(9) 0.047(4) Uani 1 1 d . . . . .
C28 C 0.3759(9) 0.6260(7) -0.0597(8) 0.038(4) Uani 1 1 d . . . . .
H28A H 0.3698 0.5997 -0.1042 0.046 Uiso 1 1 calc R U . . .
H28B H 0.4023 0.6673 -0.0740 0.046 Uiso 1 1 calc R U . . .
C46 C 0.7971(11) 0.4814(9) 0.0631(9) 0.053(4) Uani 1 1 d . . . . .
C40 C 0.7169(10) 0.5524(7) -0.0993(10) 0.041(4) Uani 1 1 d . . . . .
C29 C 0.2824(10) 0.6397(7) -0.0316(9) 0.046(4) Uani 1 1 d . . . . .
H65 H 0.2880 0.6646 0.0147 0.055 Uiso 1 1 calc R U . . .
C62 C 0.9291(11) 0.0422(7) 0.2924(9) 0.053(4) Uani 1 1 d . . . . .
H62A H 0.9152 0.0558 0.2418 0.064 Uiso 1 1 calc R U . . .
H62B H 0.9771 0.0102 0.2907 0.064 Uiso 1 1 calc R U . . .
C63 C 0.9507(9) 0.1888(7) 0.4688(9) 0.037(4) Uani 1 1 d . . . . .
C7 C 0.2383(9) 0.8618(7) 0.1095(8) 0.045(4) Uani 1 1 d . . . . .
H7A H 0.2365 0.8990 0.0761 0.053 Uiso 1 1 calc R U . . .
H7B H 0.2073 0.8740 0.1543 0.053 Uiso 1 1 calc R U . . .
C27 C 0.4402(9) 0.5927(7) -0.0085(8) 0.039(4) Uani 1 1 d . . . . .
H27 H 0.4104 0.5554 0.0146 0.046 Uiso 1 1 calc R U . . .
C6 C 0.3371(10) 0.8464(6) 0.1298(8) 0.040(4) Uani 1 1 d . . . . .
H11 H 0.3393 0.8094 0.1644 0.048 Uiso 1 1 calc R U . . .
C18 C 0.7455(10) 0.8200(7) 0.0896(9) 0.058(5) Uani 1 1 d . . . . .
H18A H 0.7928 0.7895 0.1032 0.069 Uiso 1 1 calc R U . . .
H18B H 0.7154 0.8327 0.1347 0.069 Uiso 1 1 calc R U . . .
C11 C 0.3879(10) 0.8283(8) 0.0593(9) 0.043(4) Uani 1 1 d . . . . .
C88 C 0.6814(9) 0.4750(7) 0.4988(8) 0.042(4) Uani 1 1 d . . . . .
H88 H 0.6541 0.5019 0.4594 0.051 Uiso 1 1 calc R U . . .
C17 C 0.6793(9) 0.7865(6) 0.0387(9) 0.040(4) Uani 1 1 d . . . . .
H21 H 0.7091 0.7757 -0.0078 0.048 Uiso 1 1 calc R U . . .
C93 C 0.7034(12) 0.5168(9) 0.5625(10) 0.056(5) Uani 1 1 d . . . . .
C16 C 0.5461(10) 0.8105(7) -0.0311(9) 0.042(4) Uani 1 1 d . . . . .
C53 C 1.1635(9) 0.1517(7) 0.6280(9) 0.044(4) Uani 1 1 d . . . . .
H53 H 1.1622 0.1895 0.6614 0.053 Uiso 1 1 calc R U . . .
C50 C 0.9356(11) 0.0351(7) 0.7608(9) 0.048(4) Uani 1 1 d . . . . .
O5 O 0.7978(10) 0.0418(8) 0.3610(12) 0.139(8) Uani 1 1 d . . . . .
C64 C 0.8220(9) 0.2122(7) 0.5414(9) 0.044(4) Uani 1 1 d . . . . .
H64 H 0.7911 0.2231 0.4944 0.053 Uiso 1 1 calc R U . . .
C23 C 0.5443(11) 0.6695(7) 0.1628(9) 0.047(4) Uani 1 1 d . . . . .
C43 C 0.9168(10) 0.6218(8) -0.0390(9) 0.053(5) Uani 1 1 d . . . . .
H43 H 0.8628 0.6405 -0.0627 0.063 Uiso 1 1 calc R U . . .
C41 C 0.8179(9) 0.5262(7) -0.0018(9) 0.044(4) Uani 1 1 d . . . . .
H41 H 0.8440 0.4997 -0.0413 0.053 Uiso 1 1 calc R U . . .
C22 C 0.6521(11) 0.7229(8) 0.0773(9) 0.048(4) Uani 1 1 d . . . . .
C56 C 1.3128(11) 0.2563(7) 0.6200(9) 0.062(5) Uani 1 1 d . . . . .
H56A H 1.3366 0.2460 0.6686 0.093 Uiso 1 1 calc R U . . .
H56B H 1.2525 0.2724 0.6241 0.093 Uiso 1 1 calc R U . . .
H56C H 1.3496 0.2891 0.5976 0.093 Uiso 1 1 calc R U . . .
O4 O 0.8364(9) -0.0474(7) 0.3114(8) 0.098(5) Uani 1 1 d . . . . .
C83 C 0.6782(10) 0.2766(7) 0.2922(9) 0.049(4) Uani 1 1 d . . . . .
H83A H 0.7157 0.2396 0.2797 0.058 Uiso 1 1 calc R U . . .
H83B H 0.6525 0.2690 0.3406 0.058 Uiso 1 1 calc R U . . .
C84 C 0.5573(11) 0.2304(8) 0.2254(10) 0.060(5) Uani 1 1 d . . . . .
H84A H 0.5969 0.1941 0.2148 0.072 Uiso 1 1 calc R U . . .
H84B H 0.5198 0.2377 0.1815 0.072 Uiso 1 1 calc R U . . .
C9 C 0.1837(10) 0.7442(7) 0.1180(9) 0.058(5) Uani 1 1 d . . . . .
H20 H 0.1639 0.7551 0.1669 0.088 Uiso 1 1 calc R U . . .
H9B H 0.2423 0.7247 0.1214 0.088 Uiso 1 1 calc R U . . .
H9C H 0.1423 0.7139 0.0954 0.088 Uiso 1 1 calc R U . . .
O17 O 0.7020(10) 0.9577(8) -0.1379(10) 0.118(6) Uani 1 1 d . . . . .
C82 C 0.7336(9) 0.3405(7) 0.2924(8) 0.044(4) Uani 1 1 d . . . . .
H82A H 0.7605 0.3471 0.2443 0.053 Uiso 1 1 calc R U . . .
H82B H 0.6950 0.3775 0.3025 0.053 Uiso 1 1 calc R U . . .
C54 C 1.2622(9) 0.1393(7) 0.6090(9) 0.046(4) Uani 1 1 d . . . . .
H54A H 1.2945 0.1287 0.6547 0.056 Uiso 1 1 calc R U . . .
H54B H 1.2644 0.1009 0.5774 0.056 Uiso 1 1 calc R U . . .
C90 C 0.5824(10) 0.3768(7) 0.4610(9) 0.053(4) Uani 1 1 d . . . . .
H90 H 0.6361 0.3578 0.4390 0.064 Uiso 1 1 calc R U . . .
C81 C 0.8052(9) 0.3345(7) 0.3516(8) 0.044(4) Uani 1 1 d . . . . .
H81A H 0.8499 0.3035 0.3352 0.053 Uiso 1 1 calc R U . . .
H81B H 0.7785 0.3170 0.3960 0.053 Uiso 1 1 calc R U . . .
C69 C 0.8494(12) 0.2776(8) 0.5773(9) 0.050(4) Uani 1 1 d . . . . .
C35 C 0.7660(9) 0.6590(6) -0.2052(9) 0.048(4) Uani 1 1 d . . . . .
H35A H 0.7381 0.6497 -0.2532 0.057 Uiso 1 1 calc R U . . .
H35B H 0.8059 0.6231 -0.1925 0.057 Uiso 1 1 calc R U . . .
C36 C 0.8219(10) 0.7245(7) -0.2099(9) 0.051(4) Uani 1 1 d . . . . .
H36A H 0.7834 0.7603 -0.2257 0.062 Uiso 1 1 calc R U . . .
H36B H 0.8484 0.7351 -0.1618 0.062 Uiso 1 1 calc R U . . .
C55 C 1.3124(10) 0.1936(8) 0.5709(9) 0.053(4) Uani 1 1 d . . . . .
H55 H 1.2832 0.2031 0.5228 0.063 Uiso 1 1 calc R U . . .
C4 C 0.6322(11) 0.9696(8) 0.1994(8) 0.061(5) Uani 1 1 d . . . . .
H4A H 0.6507 0.9266 0.1852 0.091 Uiso 1 1 calc R U . . .
H4B H 0.6836 0.9940 0.2166 0.091 Uiso 1 1 calc R U . . .
H4C H 0.6052 0.9913 0.1573 0.091 Uiso 1 1 calc R U . . .
C19 C 0.7888(11) 0.8828(7) 0.0535(11) 0.059(5) Uani 1 1 d . . . . .
H19 H 0.7408 0.9148 0.0449 0.071 Uiso 1 1 calc R U . . .
C8 C 0.1879(10) 0.8042(7) 0.0723(9) 0.053(4) Uani 1 1 d . . . . .
H3 H 0.2157 0.7940 0.0248 0.064 Uiso 1 1 calc R U . . .
C65 C 0.7109(11) 0.1178(7) 0.5532(11) 0.059(5) Uani 1 1 d . . . . .
H100 H 0.7582 0.0854 0.5452 0.070 Uiso 1 1 calc R U . . .
C70 C 0.9533(11) 0.3302(7) 0.6633(8) 0.048(4) Uani 1 1 d . . . . .
C14 C 0.5404(10) 0.8973(7) -0.1645(8) 0.051(4) Uani 1 1 d . . . . .
H14A H 0.4941 0.8747 -0.1932 0.061 Uiso 1 1 calc R U . . .
H14B H 0.5905 0.8676 -0.1572 0.061 Uiso 1 1 calc R U . . .
C66 C 0.7552(9) 0.1779(7) 0.5876(9) 0.053(5) Uani 1 1 d . . . . .
H66A H 0.7084 0.2088 0.6000 0.063 Uiso 1 1 calc R U . . .
H66B H 0.7848 0.1649 0.6337 0.063 Uiso 1 1 calc R U . . .
C2 C 0.5655(11) 0.9649(8) 0.2603(9) 0.053(4) Uani 1 1 d . . . . .
C77 C 1.2176(9) 0.3584(7) 0.4695(9) 0.046(4) Uani 1 1 d . . . . .
H77 H 1.2128 0.3334 0.5156 0.056 Uiso 1 1 calc R U . . .
C86 C 0.4978(11) 0.2108(8) 0.2877(11) 0.053(5) Uani 1 1 d . . . . .
C30 C 0.2313(10) 0.6801(8) -0.0875(9) 0.059(5) Uani 1 1 d . . . . .
H30A H 0.2426 0.6641 -0.1365 0.089 Uiso 1 1 calc R U . . .
H30B H 0.2505 0.7248 -0.0837 0.089 Uiso 1 1 calc R U . . .
H30C H 0.1682 0.6774 -0.0779 0.089 Uiso 1 1 calc R U . . .
C42 C 0.8869(9) 0.5762(7) 0.0232(9) 0.054(5) Uani 1 1 d . . . . .
H42A H 0.9391 0.5535 0.0434 0.065 Uiso 1 1 calc R U . . .
H42B H 0.8619 0.6022 0.0628 0.065 Uiso 1 1 calc R U . . .
C15 C 0.5721(11) 0.9585(8) -0.2082(9) 0.054(5) Uani 1 1 d . . . . .
H15A H 0.5846 0.9459 -0.2589 0.065 Uiso 1 1 calc R U . . .
H15B H 0.5240 0.9905 -0.2097 0.065 Uiso 1 1 calc R U . . .
C49 C 0.8653(10) 0.0306(8) 0.7006(9) 0.059(5) Uani 1 1 d . . . . .
H49A H 0.8092 0.0180 0.7216 0.089 Uiso 1 1 calc R U . . .
H49B H 0.8830 -0.0013 0.6647 0.089 Uiso 1 1 calc R U . . .
H49C H 0.8587 0.0724 0.6768 0.089 Uiso 1 1 calc R U . . .
C71 C 0.8818(11) 0.3582(7) 0.7136(8) 0.062(5) Uani 1 1 d . . . . .
H71A H 0.8341 0.3767 0.6838 0.092 Uiso 1 1 calc R U . . .
H71B H 0.9080 0.3916 0.7446 0.092 Uiso 1 1 calc R U . . .
H71C H 0.8583 0.3241 0.7442 0.092 Uiso 1 1 calc R U . . .
C89 C 0.6128(10) 0.4239(7) 0.5232(9) 0.057(5) Uani 1 1 d . . . . .
H89A H 0.5604 0.4463 0.5419 0.069 Uiso 1 1 calc R U . . .
H89B H 0.6388 0.3986 0.5638 0.069 Uiso 1 1 calc R U . . .
C38 C 1.0002(13) 0.7898(9) -0.2120(13) 0.066(6) Uani 1 1 d . . . . .
C92 C 0.5284(10) 0.4135(9) 0.3984(9) 0.067(5) Uani 1 1 d . . . . .
H92A H 0.4705 0.4257 0.4165 0.101 Uiso 1 1 calc R U . . .
H92B H 0.5210 0.3854 0.3561 0.101 Uiso 1 1 calc R U . . .
H92C H 0.5606 0.4520 0.3843 0.101 Uiso 1 1 calc R U . . .
C57 C 1.4070(9) 0.1703(8) 0.5585(9) 0.059(5) Uani 1 1 d . . . . .
H57A H 1.4378 0.1656 0.6056 0.089 Uiso 1 1 calc R U . . .
H57B H 1.4381 0.2016 0.5287 0.089 Uiso 1 1 calc R U . . .
H57C H 1.4054 0.1290 0.5334 0.089 Uiso 1 1 calc R U . . .
C48 C 0.9113(11) 0.0819(9) 0.8192(9) 0.071(5) Uani 1 1 d . . . . .
H48A H 0.9054 0.1248 0.7980 0.107 Uiso 1 1 calc R U . . .
H48B H 0.9573 0.0823 0.8572 0.107 Uiso 1 1 calc R U . . .
H48C H 0.8552 0.0691 0.8403 0.107 Uiso 1 1 calc R U . . .
C3 C 0.5882(13) 0.9160(9) 0.3197(10) 0.080(6) Uani 1 1 d . . . . .
H3A H 0.5429 0.9169 0.3569 0.121 Uiso 1 1 calc R U . . .
H3B H 0.6454 0.9267 0.3421 0.121 Uiso 1 1 calc R U . . .
H3C H 0.5910 0.8732 0.2982 0.121 Uiso 1 1 calc R U . . .
C24 C 0.6171(12) 0.6401(8) 0.2125(10) 0.076(6) Uani 1 1 d . . . . .
H24A H 0.6650 0.6242 0.1825 0.114 Uiso 1 1 calc R U . . .
H24B H 0.5925 0.6047 0.2405 0.114 Uiso 1 1 calc R U . . .
H24C H 0.6399 0.6729 0.2460 0.114 Uiso 1 1 calc R U . . .
C20 C 0.8544(10) 0.9113(8) 0.1102(10) 0.068(5) Uani 1 1 d . . . . .
H20A H 0.9052 0.8827 0.1160 0.102 Uiso 1 1 calc R U . . .
H20B H 0.8252 0.9159 0.1570 0.102 Uiso 1 1 calc R U . . .
H20C H 0.8743 0.9533 0.0935 0.102 Uiso 1 1 calc R U . . .
C76 C 1.2668(10) 0.4213(8) 0.4863(11) 0.076(6) Uani 1 1 d . . . . .
H76A H 1.3256 0.4115 0.5061 0.114 Uiso 1 1 calc R U . . .
H76B H 1.2340 0.4460 0.5221 0.114 Uiso 1 1 calc R U . . .
H76C H 1.2721 0.4463 0.4415 0.114 Uiso 1 1 calc R U . . .
C37 C 0.9420(11) 0.7715(8) -0.2756(9) 0.057(5) Uani 1 1 d . . . . .
H37A H 0.9012 0.8073 -0.2867 0.068 Uiso 1 1 calc R U . . .
H37B H 0.9790 0.7648 -0.3187 0.068 Uiso 1 1 calc R U . . .
C72 C 1.0370(11) 0.3091(7) 0.7057(9) 0.063(5) Uani 1 1 d . . . . .
H72A H 1.0214 0.2770 0.7422 0.095 Uiso 1 1 calc R U . . .
H72B H 1.0635 0.3463 0.7301 0.095 Uiso 1 1 calc R U . . .
H72C H 1.0792 0.2907 0.6719 0.095 Uiso 1 1 calc R U . . .
C25 C 0.4631(11) 0.6900(8) 0.2056(9) 0.070(5) Uani 1 1 d . . . . .
H25A H 0.4794 0.7247 0.2392 0.105 Uiso 1 1 calc R U . . .
H25B H 0.4411 0.6535 0.2333 0.105 Uiso 1 1 calc R U . . .
H25C H 0.4171 0.7050 0.1716 0.105 Uiso 1 1 calc R U . . .
C68 C 0.6434(10) 0.0877(8) 0.6089(10) 0.072(6) Uani 1 1 d . . . . .
H68A H 0.5972 0.1190 0.6192 0.108 Uiso 1 1 calc R U . . .
H68B H 0.6747 0.0765 0.6543 0.108 Uiso 1 1 calc R U . . .
H68C H 0.6168 0.0492 0.5876 0.108 Uiso 1 1 calc R U . . .
C44 C 0.9710(10) 0.5860(9) -0.1000(10) 0.067(5) Uani 1 1 d . . . . .
H44A H 0.9790 0.6148 -0.1415 0.101 Uiso 1 1 calc R U . . .
H44B H 0.9386 0.5478 -0.1162 0.101 Uiso 1 1 calc R U . . .
H44C H 1.0286 0.5734 -0.0800 0.101 Uiso 1 1 calc R U . . .
C91 C 0.5289(10) 0.3227(8) 0.4943(9) 0.062(5) Uani 1 1 d . . . . .
H91A H 0.5661 0.2989 0.5292 0.094 Uiso 1 1 calc R U . . .
H91B H 0.5082 0.2937 0.4557 0.094 Uiso 1 1 calc R U . . .
H91C H 0.4783 0.3406 0.5194 0.094 Uiso 1 1 calc R U . . .
C78 C 1.2688(10) 0.3185(9) 0.4149(10) 0.070(6) Uani 1 1 d . . . . .
H78A H 1.2360 0.2792 0.4036 0.105 Uiso 1 1 calc R U . . .
H78B H 1.3265 0.3074 0.4359 0.105 Uiso 1 1 calc R U . . .
H78C H 1.2766 0.3432 0.3702 0.105 Uiso 1 1 calc R U . . .
C51 C 0.9481(11) -0.0324(9) 0.7983(11) 0.081(6) Uani 1 1 d . . . . .
H51A H 0.9997 -0.0312 0.8311 0.121 Uiso 1 1 calc R U . . .
H51B H 0.9566 -0.0651 0.7609 0.121 Uiso 1 1 calc R U . . .
H51C H 0.8957 -0.0427 0.8262 0.121 Uiso 1 1 calc R U . . .
C1 C 0.5522(12) 1.0342(9) 0.2969(11) 0.081(6) Uani 1 1 d . . . . .
H1A H 0.5362 1.0654 0.2591 0.121 Uiso 1 1 calc R U . . .
H1B H 0.6072 1.0475 0.3213 0.121 Uiso 1 1 calc R U . . .
H1C H 0.5053 1.0319 0.3326 0.121 Uiso 1 1 calc R U . . .
C47 C 0.7147(12) 0.4764(9) 0.1767(11) 0.090(7) Uani 1 1 d . . . . .
H47A H 0.6982 0.4318 0.1670 0.134 Uiso 1 1 calc R U . . .
H47B H 0.6656 0.4986 0.1995 0.134 Uiso 1 1 calc R U . . .
H47C H 0.7664 0.4776 0.2093 0.134 Uiso 1 1 calc R U . . .
C85 C 0.4504(12) 0.1924(9) 0.3335(11) 0.069(5) Uani 1 1 d . . . . .
H85 H 0.4124 0.1776 0.3702 0.083 Uiso 1 1 calc R U . . .
C10 C 0.0901(10) 0.8293(9) 0.0577(10) 0.073(6) Uani 1 1 d . . . . .
H10A H 0.0553 0.7956 0.0337 0.109 Uiso 1 1 calc R U . . .
H10B H 0.0916 0.8671 0.0263 0.109 Uiso 1 1 calc R U . . .
H10C H 0.0633 0.8405 0.1040 0.109 Uiso 1 1 calc R U . . .
C21 C 0.8306(13) 0.8689(10) -0.0191(11) 0.090(7) Uani 1 1 d . . . . .
H21A H 0.8612 0.9072 -0.0361 0.135 Uiso 1 1 calc R U . . .
H21B H 0.7847 0.8568 -0.0548 0.135 Uiso 1 1 calc R U . . .
H21C H 0.8727 0.8337 -0.0134 0.135 Uiso 1 1 calc R U . . .
C45 C 0.9721(11) 0.6779(9) -0.0056(10) 0.082(6) Uani 1 1 d . . . . .
H45A H 0.9400 0.6972 0.0346 0.123 Uiso 1 1 calc R U . . .
H45B H 0.9824 0.7103 -0.0430 0.123 Uiso 1 1 calc R U . . .
H45C H 1.0287 0.6614 0.0127 0.123 Uiso 1 1 calc R U . . .
C94 C 0.7844(12) 0.5255(8) 0.6774(10) 0.077(6) Uani 1 1 d . . . . .
H94A H 0.7989 0.5702 0.6671 0.115 Uiso 1 1 calc R U . . .
H94B H 0.8346 0.5049 0.7022 0.115 Uiso 1 1 calc R U . . .
H94C H 0.7330 0.5238 0.7087 0.115 Uiso 1 1 calc R U . . .
C39 C 1.0497(15) 0.8067(11) -0.1629(13) 0.090(7) Uani 1 1 d . . . . .
H39 H 1.0883 0.8199 -0.1246 0.108 Uiso 1 1 calc R U . . .
C31 C 0.2341(11) 0.5780(8) -0.0160(11) 0.074(6) Uani 1 1 d . . . . .
H31A H 0.1796 0.5876 0.0094 0.111 Uiso 1 1 calc R U . . .
H31B H 0.2715 0.5504 0.0146 0.111 Uiso 1 1 calc R U . . .
H31C H 0.2201 0.5561 -0.0619 0.111 Uiso 1 1 calc R U . . .
C67 C 0.6680(13) 0.1306(10) 0.4823(12) 0.096(7) Uani 1 1 d . . . . .
H67A H 0.6211 0.1622 0.4884 0.145 Uiso 1 1 calc R U . . .
H67B H 0.6429 0.0908 0.4628 0.145 Uiso 1 1 calc R U . . .
H67C H 0.7115 0.1473 0.4485 0.145 Uiso 1 1 calc R U . . .
 
loop_
 _atom_site_aniso_label
 _atom_site_aniso_U_11
 _atom_site_aniso_U_22
 _atom_site_aniso_U_33
 _atom_site_aniso_U_23
 _atom_site_aniso_U_13
 _atom_site_aniso_U_12
O19 0.062(7) 0.022(6) 0.048(7) 0.000(5) 0.002(5) 0.010(5)
O2 0.044(6) 0.019(6) 0.071(8) 0.007(5) -0.001(5) 0.004(5)
O6 0.060(7) 0.016(5) 0.052(7) 0.006(5) 0.005(5) 0.001(5)
O14 0.061(7) 0.029(6) 0.051(7) -0.011(5) 0.003(6) 0.000(5)
O1 0.062(7) 0.028(6) 0.058(7) 0.019(5) 0.015(6) -0.004(5)
O22 0.053(6) 0.020(6) 0.046(7) -0.004(5) 0.000(5) 0.000(5)
O24 0.055(6) 0.017(6) 0.066(8) 0.006(5) 0.006(5) 0.008(5)
O16 0.053(7) 0.013(5) 0.074(8) -0.001(5) 0.016(5) 0.005(5)
O3 0.049(6) 0.014(5) 0.069(7) 0.004(5) -0.008(5) 0.004(5)
O11 0.062(7) 0.030(6) 0.057(7) -0.001(6) -0.003(6) 0.009(5)
O9 0.058(7) 0.017(5) 0.050(7) 0.003(5) 0.010(5) 0.004(5)
O20 0.076(8) 0.019(6) 0.068(8) -0.008(5) -0.014(6) 0.006(6)
O15 0.065(8) 0.021(6) 0.067(8) -0.011(5) 0.001(6) 0.010(5)
N14 0.053(8) 0.015(6) 0.037(8) 0.000(6) 0.010(6) -0.003(6)
O23 0.055(7) 0.031(6) 0.072(8) -0.006(5) 0.037(6) -0.009(5)
O8 0.088(8) 0.025(6) 0.051(7) 0.001(5) 0.019(6) -0.001(6)
O7 0.067(8) 0.025(6) 0.075(8) 0.014(6) 0.027(6) 0.021(6)
O21 0.086(8) 0.027(6) 0.043(7) 0.008(5) -0.005(6) 0.006(6)
N6 0.051(8) 0.023(7) 0.042(8) 0.006(6) -0.001(6) 0.011(6)
N1 0.042(8) 0.028(7) 0.053(9) -0.008(6) 0.004(6) -0.004(6)
N12 0.050(8) 0.013(6) 0.055(9) 0.011(6) 0.006(7) -0.006(6)
N15 0.039(7) 0.024(7) 0.040(8) -0.002(6) -0.003(6) -0.012(6)
N8 0.043(8) 0.025(7) 0.043(9) 0.008(6) 0.003(6) 0.014(6)
N2 0.047(8) 0.011(6) 0.052(8) 0.004(6) 0.013(6) -0.002(5)
N10 0.046(8) 0.017(7) 0.051(9) -0.001(6) -0.013(6) -0.002(6)
N4 0.050(8) 0.017(7) 0.066(10) 0.002(6) 0.002(7) 0.006(6)
N7 0.031(7) 0.025(7) 0.046(8) -0.006(6) -0.002(6) -0.003(6)
N13 0.059(9) 0.016(7) 0.061(9) -0.001(6) 0.007(8) -0.002(6)
N5 0.062(9) 0.012(6) 0.050(9) -0.008(6) -0.018(7) 0.011(6)
O26 0.085(9) 0.054(8) 0.062(9) 0.019(7) 0.016(7) 0.021(7)
N16 0.045(8) 0.018(7) 0.055(10) 0.003(6) 0.002(7) 0.010(6)
N9 0.062(9) 0.014(6) 0.052(9) 0.008(6) -0.009(7) 0.000(6)
O13 0.094(10) 0.074(9) 0.056(9) -0.021(7) -0.002(7) 0.026(7)
O10 0.053(7) 0.036(7) 0.080(8) -0.004(6) -0.021(6) -0.008(5)
N3 0.074(12) 0.040(10) 0.093(14) -0.002(10) 0.026(10) -0.001(9)
C59 0.047(9) 0.014(7) 0.044(10) 0.006(7) -0.004(8) -0.005(7)
O25 0.118(11) 0.039(7) 0.111(11) 0.025(7) 0.000(8) 0.049(7)
C73 0.061(11) 0.023(9) 0.031(10) -0.001(7) 0.002(8) -0.006(8)
C52 0.039(10) 0.061(13) 0.035(10) -0.006(9) 0.012(8) -0.007(9)
C5 0.069(13) 0.037(11) 0.036(10) 0.006(8) -0.003(9) -0.012(10)
N11 0.073(12) 0.045(11) 0.106(14) -0.007(10) -0.036(10) -0.005(10)
C87 0.032(9) 0.030(9) 0.055(12) -0.005(8) 0.002(8) -0.019(7)
C74 0.034(9) 0.028(8) 0.052(11) -0.010(8) 0.000(8) -0.002(7)
C58 0.037(9) 0.024(9) 0.074(13) -0.004(9) -0.013(8) 0.005(7)
C96 0.034(8) 0.015(7) 0.043(9) -0.003(7) 0.004(7) -0.005(6)
C60 0.049(9) 0.026(8) 0.039(10) 0.011(7) -0.003(8) 0.003(7)
C75 0.045(10) 0.024(8) 0.046(10) 0.011(7) 0.004(8) 0.003(7)
O12 0.129(11) 0.058(9) 0.080(10) -0.011(7) 0.002(8) 0.048(8)
C32 0.049(10) 0.029(9) 0.032(9) 0.003(7) 0.003(7) 0.004(8)
C34 0.034(9) 0.018(8) 0.062(11) 0.015(7) 0.006(8) 0.000(6)
C61 0.063(11) 0.031(9) 0.048(11) -0.002(8) 0.006(8) 0.008(8)
C79 0.040(10) 0.043(11) 0.035(10) -0.008(8) 0.023(7) 0.000(8)
C13 0.035(8) 0.024(8) 0.061(11) 0.006(8) 0.015(8) 0.013(7)
C12 0.040(9) 0.015(7) 0.042(10) -0.010(7) 0.002(7) -0.006(6)
C33 0.023(8) 0.025(8) 0.072(12) -0.015(8) -0.001(8) 0.006(7)
O18 0.084(10) 0.058(10) 0.156(14) 0.006(10) 0.012(9) -0.016(8)
C26 0.071(12) 0.019(9) 0.051(12) 0.003(8) -0.003(9) 0.002(8)
C28 0.039(9) 0.022(8) 0.053(10) -0.002(7) 0.009(8) 0.001(7)
C46 0.055(12) 0.051(12) 0.053(12) -0.006(10) -0.001(9) -0.012(10)
C40 0.043(10) 0.019(8) 0.063(13) 0.004(8) 0.001(9) -0.007(7)
C29 0.055(11) 0.029(9) 0.055(11) -0.010(8) 0.016(8) 0.000(8)
C62 0.075(12) 0.025(9) 0.060(12) 0.002(8) -0.001(9) -0.010(9)
C63 0.041(9) 0.021(8) 0.050(11) -0.001(8) 0.009(8) -0.001(7)
C7 0.050(10) 0.037(9) 0.047(10) 0.000(8) 0.014(8) -0.006(8)
C27 0.041(9) 0.027(8) 0.048(10) 0.005(8) 0.013(8) -0.001(7)
C6 0.059(11) 0.019(8) 0.042(10) 0.001(7) -0.004(8) -0.015(7)
C18 0.066(12) 0.024(9) 0.083(14) -0.008(9) -0.014(10) 0.016(8)
C11 0.043(10) 0.028(10) 0.059(12) 0.009(9) 0.005(8) -0.004(8)
C88 0.035(9) 0.046(10) 0.045(10) -0.005(8) 0.005(7) 0.014(8)
C17 0.042(9) 0.023(8) 0.056(10) -0.002(7) -0.010(8) -0.004(7)
C93 0.063(12) 0.052(12) 0.051(12) -0.006(10) -0.003(10) 0.004(10)
C16 0.052(10) 0.031(10) 0.043(10) 0.003(8) -0.013(9) -0.008(8)
C53 0.044(10) 0.021(8) 0.067(12) 0.017(8) 0.010(8) -0.013(7)
C50 0.060(11) 0.036(10) 0.049(11) 0.015(8) 0.013(9) 0.013(8)
O5 0.084(11) 0.081(12) 0.25(2) -0.084(13) 0.021(12) -0.003(9)
C64 0.042(9) 0.027(9) 0.064(11) 0.008(8) 0.021(8) 0.002(7)
C23 0.074(12) 0.023(8) 0.044(11) -0.010(8) -0.004(9) 0.010(8)
C43 0.036(10) 0.043(11) 0.079(13) 0.015(10) -0.004(9) 0.000(8)
C41 0.039(9) 0.033(9) 0.060(11) -0.003(8) -0.009(8) 0.013(8)
C22 0.062(11) 0.026(9) 0.057(12) -0.017(8) -0.008(9) 0.003(8)
C56 0.078(12) 0.026(9) 0.080(13) 0.017(9) -0.025(10) -0.010(8)
O4 0.082(9) 0.068(10) 0.144(14) -0.010(10) -0.005(9) -0.012(8)
C83 0.061(11) 0.025(9) 0.059(11) -0.002(8) -0.016(9) 0.003(8)
C84 0.062(11) 0.030(9) 0.086(14) 0.001(9) -0.031(10) -0.004(9)
C9 0.071(12) 0.025(9) 0.079(13) -0.016(9) 0.013(10) -0.014(8)
O17 0.090(11) 0.095(13) 0.168(16) 0.059(12) -0.011(10) -0.011(9)
C82 0.044(10) 0.038(10) 0.052(11) 0.003(8) -0.001(8) -0.004(7)
C54 0.044(10) 0.024(8) 0.070(12) 0.000(8) -0.017(8) -0.007(7)
C90 0.049(11) 0.037(10) 0.074(13) -0.010(9) 0.001(9) -0.008(8)
C81 0.049(10) 0.033(9) 0.050(11) -0.009(8) -0.002(8) -0.004(7)
C69 0.055(11) 0.048(12) 0.048(11) 0.011(9) 0.019(9) -0.006(9)
C35 0.047(10) 0.020(8) 0.076(12) -0.001(8) 0.007(9) -0.004(7)
C36 0.061(10) 0.028(9) 0.066(12) -0.010(8) 0.032(9) -0.001(8)
C55 0.054(11) 0.043(10) 0.061(12) 0.007(9) -0.004(8) 0.004(8)
C4 0.087(13) 0.053(12) 0.042(11) -0.014(9) 0.000(10) 0.004(10)
C19 0.044(10) 0.030(10) 0.104(16) -0.004(10) -0.005(10) 0.002(8)
C8 0.068(12) 0.030(9) 0.063(12) -0.001(9) 0.022(9) -0.013(8)
C65 0.055(11) 0.027(9) 0.094(15) -0.005(9) 0.011(11) 0.001(8)
C70 0.079(12) 0.024(9) 0.041(10) -0.004(8) 0.000(9) 0.004(8)
C14 0.061(11) 0.037(10) 0.054(11) -0.003(8) 0.016(9) 0.005(8)
C66 0.045(10) 0.041(10) 0.072(13) 0.002(9) 0.001(9) 0.018(8)
C2 0.049(11) 0.051(11) 0.058(12) -0.013(9) -0.003(9) 0.011(8)
C77 0.039(10) 0.045(10) 0.055(11) 0.014(9) -0.010(8) 0.005(8)
C86 0.047(11) 0.050(12) 0.061(13) -0.004(10) -0.005(10) -0.016(9)
C30 0.050(10) 0.050(11) 0.076(13) -0.006(10) -0.001(9) 0.020(9)
C42 0.032(9) 0.044(11) 0.086(14) 0.003(10) -0.006(9) 0.013(8)
C15 0.061(12) 0.043(11) 0.057(12) -0.010(9) -0.001(9) -0.006(9)
C49 0.060(11) 0.057(12) 0.060(12) 0.006(10) 0.008(9) 0.004(9)
C71 0.095(13) 0.037(10) 0.054(11) -0.003(9) 0.040(10) 0.017(9)
C89 0.059(11) 0.040(11) 0.074(13) -0.003(9) 0.018(9) 0.018(9)
C38 0.058(14) 0.054(13) 0.089(18) 0.022(12) 0.043(12) 0.007(10)
C92 0.053(11) 0.070(13) 0.077(14) 0.009(11) 0.002(10) -0.009(9)
C57 0.048(11) 0.050(11) 0.080(13) 0.006(10) 0.000(9) -0.023(9)
C48 0.077(13) 0.068(13) 0.068(13) -0.015(11) 0.010(10) 0.023(10)
C3 0.107(16) 0.060(13) 0.074(14) 0.016(11) -0.001(11) 0.010(11)
C24 0.114(16) 0.029(10) 0.085(14) -0.021(10) -0.025(12) -0.005(10)
C20 0.041(10) 0.042(11) 0.121(16) -0.009(11) -0.011(10) -0.001(8)
C76 0.048(11) 0.049(12) 0.131(18) -0.009(12) -0.009(11) -0.007(9)
C37 0.069(12) 0.053(11) 0.048(12) 0.014(9) 0.010(9) -0.013(9)
C72 0.103(14) 0.036(10) 0.050(11) 0.018(9) -0.016(10) -0.015(10)
C25 0.101(15) 0.048(11) 0.061(13) 0.010(10) 0.030(11) -0.007(10)
C68 0.049(11) 0.060(12) 0.107(16) -0.031(11) 0.017(10) -0.021(9)
C44 0.053(11) 0.063(13) 0.086(15) -0.017(11) 0.001(10) -0.010(9)
C91 0.065(12) 0.055(12) 0.068(13) -0.006(10) 0.009(9) -0.014(9)
C78 0.050(11) 0.065(13) 0.096(15) 0.024(11) -0.002(10) 0.030(10)
C51 0.079(13) 0.058(13) 0.107(16) 0.043(12) 0.014(11) 0.007(10)
C1 0.086(14) 0.053(12) 0.103(16) -0.039(12) -0.010(11) -0.007(10)
C47 0.100(16) 0.080(15) 0.089(16) 0.050(13) 0.006(12) 0.031(12)
C85 0.071(14) 0.060(13) 0.076(15) -0.006(11) 0.006(11) 0.001(11)
C10 0.054(12) 0.057(13) 0.107(16) -0.016(11) 0.004(10) -0.013(9)
C21 0.089(15) 0.072(15) 0.109(18) -0.002(14) 0.015(13) -0.029(12)
C45 0.080(14) 0.082(15) 0.083(15) -0.026(12) -0.035(11) -0.013(11)
C94 0.116(16) 0.050(12) 0.063(13) -0.012(11) -0.016(11) 0.011(11)
C39 0.090(18) 0.082(17) 0.098(19) 0.011(14) 0.010(14) -0.026(13)
C31 0.059(12) 0.048(12) 0.116(17) 0.001(11) 0.007(11) -0.006(9)
C67 0.088(16) 0.073(15) 0.13(2) -0.019(14) -0.026(14) -0.016(12)
 
_geom_special_details
;
 All esds (except the esd in the dihedral angle between two l.s. planes)
 are estimated using the full covariance matrix.  The cell esds are taken
 into account individually in the estimation of esds in distances, angles
 and torsion angles; correlations between esds in cell parameters are only
 used when they are defined by crystal symmetry.  An approximate (isotropic)
 treatment of cell esds is used for estimating esds involving l.s. planes.
;
 
loop_
 _geom_bond_atom_site_label_1
 _geom_bond_atom_site_label_2
 _geom_bond_distance
 _geom_bond_site_symmetry_2
 _geom_bond_publ_flag
O19 C16 1.242(16) . ?
O2 C52 1.211(17) . ?
O6 C63 1.226(15) . ?
O14 C5 1.348(17) . ?
O14 C2 1.454(17) . ?
O1 C52 1.325(18) . ?
O1 C50 1.449(17) . ?
O22 C32 1.238(15) . ?
O24 C40 1.248(17) . ?
O16 C11 1.218(16) . ?
O3 C58 1.238(16) . ?
O11 C87 1.258(17) . ?
O9 C79 1.249(16) . ?
O20 C22 1.213(17) . ?
O15 C5 1.214(18) . ?
N14 C73 1.296(16) . ?
N14 C74 1.430(17) . ?
N14 H31 0.8600 . ?
O23 C36 1.427(15) . ?
O23 C37 1.435(17) . ?
O8 C73 1.272(16) . ?
O7 C69 1.212(18) . ?
O21 C26 1.245(16) . ?
N6 C26 1.264(17) . ?
N6 C27 1.438(17) . ?
N6 H8 0.8600 . ?
N1 C5 1.322(18) . ?
N1 C6 1.435(16) . ?
N1 H18 0.8600 . ?
N12 C63 1.309(16) . ?
N12 C64 1.431(16) . ?
N12 H6 0.8600 . ?
N15 C79 1.331(17) . ?
N15 C96 1.431(16) . ?
N15 H29 0.8600 . ?
N8 C40 1.276(17) . ?
N8 C41 1.415(16) . ?
N8 H70 0.8600 . ?
N2 C11 1.325(17) . ?
N2 C12 1.434(16) . ?
N2 H30 0.8600 . ?
N10 C58 1.293(17) . ?
N10 C59 1.414(16) . ?
N10 H25 0.8600 . ?
N4 C16 1.301(16) . ?
N4 C17 1.446(16) . ?
N4 H28 0.8600 . ?
N7 C32 1.353(16) . ?
N7 C33 1.424(16) . ?
N7 H12 0.8600 . ?
N13 C69 1.299(18) . ?
N13 C70 1.457(17) . ?
N13 H23 0.8600 . ?
N5 C22 1.360(18) . ?
N5 C23 1.453(18) . ?
N5 H24 0.8600 . ?
O26 C46 1.343(19) . ?
O26 C47 1.449(18) . ?
N16 C87 1.314(17) . ?
N16 C88 1.455(16) . ?
N16 H26 0.8600 . ?
N9 C52 1.357(17) . ?
N9 C53 1.432(16) . ?
N9 H22 0.8600 . ?
O13 C93 1.301(18) . ?
O13 C94 1.491(18) . ?
O10 C84 1.390(16) . ?
O10 C83 1.417(16) . ?
N3 O17 1.169(18) . ?
N3 O18 1.206(17) . ?
N3 C15 1.46(2) . ?
C59 C60 1.493(18) . ?
C59 C63 1.525(19) . ?
C59 H59 0.9800 . ?
O25 C46 1.164(19) . ?
C73 C70 1.53(2) . ?
N11 O5 1.181(19) . ?
N11 O4 1.247(18) . ?
N11 C62 1.48(2) . ?
C87 C96 1.496(19) . ?
C74 C79 1.491(19) . ?
C74 C75 1.523(18) . ?
C74 H74 0.9800 . ?
C58 C53 1.49(2) . ?
C96 C81 1.538(17) . ?
C96 H96 0.9800 . ?
C60 C61 1.453(18) . ?
C60 H60A 0.9700 . ?
C60 H60B 0.9700 . ?
C75 C77 1.497(18) . ?
C75 H75A 0.9700 . ?
C75 H75B 0.9700 . ?
O12 C93 1.200(19) . ?
C32 C27 1.509(19) . ?
C34 C35 1.508(18) . ?
C34 C33 1.530(17) . ?
C34 H34A 0.9700 . ?
C34 H34B 0.9700 . ?
C61 C62 1.484(19) . ?
C61 H61A 0.9700 . ?
C61 H61B 0.9700 . ?
C13 C14 1.521(19) . ?
C13 C12 1.535(17) . ?
C13 H13A 0.9700 . ?
C13 H13B 0.9700 . ?
C12 C16 1.524(19) . ?
C12 H9 0.9800 . ?
C33 C40 1.522(19) . ?
C33 H33 0.9800 . ?
C26 C23 1.52(2) . ?
C28 C27 1.482(18) . ?
C28 C29 1.515(18) . ?
C28 H28A 0.9700 . ?
C28 H28B 0.9700 . ?
C46 C41 1.52(2) . ?
C29 C31 1.48(2) . ?
C29 C30 1.498(19) . ?
C29 H65 0.9800 . ?
C62 H62A 0.9700 . ?
C62 H62B 0.9700 . ?
C7 C6 1.540(18) . ?
C7 C8 1.54(2) . ?
C7 H7A 0.9700 . ?
C7 H7B 0.9700 . ?
C27 H27 0.9800 . ?
C6 C11 1.53(2) . ?
C6 H11 0.9800 . ?
C18 C17 1.500(19) . ?
C18 C19 1.58(2) . ?
C18 H18A 0.9700 . ?
C18 H18B 0.9700 . ?
C88 C93 1.46(2) . ?
C88 C89 1.53(2) . ?
C88 H88 0.9800 . ?
C17 C22 1.53(2) . ?
C17 H21 0.9800 . ?
C53 C54 1.536(18) . ?
C53 H53 0.9800 . ?
C50 C48 1.47(2) . ?
C50 C49 1.49(2) . ?
C50 C51 1.55(2) . ?
C64 C66 1.486(19) . ?
C64 C69 1.54(2) . ?
C64 H64 0.9800 . ?
C23 C25 1.50(2) . ?
C23 C24 1.52(2) . ?
C43 C45 1.53(2) . ?
C43 C42 1.53(2) . ?
C43 C44 1.56(2) . ?
C43 H43 0.9800 . ?
C41 C42 1.512(19) . ?
C41 H41 0.9800 . ?
C56 C55 1.56(2) . ?
C56 H56A 0.9600 . ?
C56 H56B 0.9600 . ?
C56 H56C 0.9600 . ?
C83 C82 1.547(18) . ?
C83 H83A 0.9700 . ?
C83 H83B 0.9700 . ?
C84 C86 1.50(2) . ?
C84 H84A 0.9700 . ?
C84 H84B 0.9700 . ?
C9 C8 1.481(19) . ?
C9 H20 0.9600 . ?
C9 H9B 0.9600 . ?
C9 H9C 0.9600 . ?
C82 C81 1.499(18) . ?
C82 H82A 0.9700 . ?
C82 H82B 0.9700 . ?
C54 C55 1.51(2) . ?
C54 H54A 0.9700 . ?
C54 H54B 0.9700 . ?
C90 C91 1.50(2) . ?
C90 C89 1.54(2) . ?
C90 C92 1.56(2) . ?
C90 H90 0.9800 . ?
C81 H81A 0.9700 . ?
C81 H81B 0.9700 . ?
C35 C36 1.581(18) . ?
C35 H35A 0.9700 . ?
C35 H35B 0.9700 . ?
C36 H36A 0.9700 . ?
C36 H36B 0.9700 . ?
C55 C57 1.506(19) . ?
C55 H55 0.9800 . ?
C4 C2 1.50(2) . ?
C4 H4A 0.9600 . ?
C4 H4B 0.9600 . ?
C4 H4C 0.9600 . ?
C19 C21 1.49(2) . ?
C19 C20 1.52(2) . ?
C19 H19 0.9800 . ?
C8 C10 1.56(2) . ?
C8 H3 0.9800 . ?
C65 C67 1.44(2) . ?
C65 C66 1.52(2) . ?
C65 C68 1.56(2) . ?
C65 H100 0.9800 . ?
C70 C72 1.51(2) . ?
C70 C71 1.523(19) . ?
C14 C15 1.56(2) . ?
C14 H14A 0.9700 . ?
C14 H14B 0.9700 . ?
C66 H66A 0.9700 . ?
C66 H66B 0.9700 . ?
C2 C3 1.50(2) . ?
C2 C1 1.58(2) . ?
C77 C78 1.50(2) . ?
C77 C76 1.51(2) . ?
C77 H77 0.9800 . ?
C86 C85 1.16(2) . ?
C30 H30A 0.9600 . ?
C30 H30B 0.9600 . ?
C30 H30C 0.9600 . ?
C42 H42A 0.9700 . ?
C42 H42B 0.9700 . ?
C15 H15A 0.9700 . ?
C15 H15B 0.9700 . ?
C49 H49A 0.9600 . ?
C49 H49B 0.9600 . ?
C49 H49C 0.9600 . ?
C71 H71A 0.9600 . ?
C71 H71B 0.9600 . ?
C71 H71C 0.9600 . ?
C89 H89A 0.9700 . ?
C89 H89B 0.9700 . ?
C38 C39 1.19(3) . ?
C38 C37 1.47(3) . ?
C92 H92A 0.9600 . ?
C92 H92B 0.9600 . ?
C92 H92C 0.9600 . ?
C57 H57A 0.9600 . ?
C57 H57B 0.9600 . ?
C57 H57C 0.9600 . ?
C48 H48A 0.9600 . ?
C48 H48B 0.9600 . ?
C48 H48C 0.9600 . ?
C3 H3A 0.9600 . ?
C3 H3B 0.9600 . ?
C3 H3C 0.9600 . ?
C24 H24A 0.9600 . ?
C24 H24B 0.9600 . ?
C24 H24C 0.9600 . ?
C20 H20A 0.9600 . ?
C20 H20B 0.9600 . ?
C20 H20C 0.9600 . ?
C76 H76A 0.9600 . ?
C76 H76B 0.9600 . ?
C76 H76C 0.9600 . ?
C37 H37A 0.9700 . ?
C37 H37B 0.9700 . ?
C72 H72A 0.9600 . ?
C72 H72B 0.9600 . ?
C72 H72C 0.9600 . ?
C25 H25A 0.9600 . ?
C25 H25B 0.9600 . ?
C25 H25C 0.9600 . ?
C68 H68A 0.9600 . ?
C68 H68B 0.9600 . ?
C68 H68C 0.9600 . ?
C44 H44A 0.9600 . ?
C44 H44B 0.9600 . ?
C44 H44C 0.9600 . ?
C91 H91A 0.9600 . ?
C91 H91B 0.9600 . ?
C91 H91C 0.9600 . ?
C78 H78A 0.9600 . ?
C78 H78B 0.9600 . ?
C78 H78C 0.9600 . ?
C51 H51A 0.9600 . ?
C51 H51B 0.9600 . ?
C51 H51C 0.9600 . ?
C1 H1A 0.9600 . ?
C1 H1B 0.9600 . ?
C1 H1C 0.9600 . ?
C47 H47A 0.9600 . ?
C47 H47B 0.9600 . ?
C47 H47C 0.9600 . ?
C85 H85 0.9300 . ?
C10 H10A 0.9600 . ?
C10 H10B 0.9600 . ?
C10 H10C 0.9600 . ?
C21 H21A 0.9600 . ?
C21 H21B 0.9600 . ?
C21 H21C 0.9600 . ?
C45 H45A 0.9600 . ?
C45 H45B 0.9600 . ?
C45 H45C 0.9600 . ?
C94 H94A 0.9600 . ?
C94 H94B 0.9600 . ?
C94 H94C 0.9600 . ?
C39 H39 0.9300 . ?
C31 H31A 0.9600 . ?
C31 H31B 0.9600 . ?
C31 H31C 0.9600 . ?
C67 H67A 0.9600 . ?
C67 H67B 0.9600 . ?
C67 H67C 0.9600 . ?
 
loop_
 _geom_angle_atom_site_label_1
 _geom_angle_atom_site_label_2
 _geom_angle_atom_site_label_3
 _geom_angle
 _geom_angle_site_symmetry_1
 _geom_angle_site_symmetry_3
 _geom_angle_publ_flag
C5 O14 C2 119.3(12) . . ?
C52 O1 C50 118.9(11) . . ?
C73 N14 C74 121.8(12) . . ?
C73 N14 H31 119.1 . . ?
C74 N14 H31 119.1 . . ?
C36 O23 C37 111.6(11) . . ?
C26 N6 C27 121.7(12) . . ?
C26 N6 H8 119.2 . . ?
C27 N6 H8 119.2 . . ?
C5 N1 C6 117.3(13) . . ?
C5 N1 H18 121.3 . . ?
C6 N1 H18 121.3 . . ?
C63 N12 C64 121.2(12) . . ?
C63 N12 H6 119.4 . . ?
C64 N12 H6 119.4 . . ?
C79 N15 C96 122.5(12) . . ?
C79 N15 H29 118.8 . . ?
C96 N15 H29 118.8 . . ?
C40 N8 C41 121.7(13) . . ?
C40 N8 H70 119.2 . . ?
C41 N8 H70 119.2 . . ?
C11 N2 C12 118.6(12) . . ?
C11 N2 H30 120.7 . . ?
C12 N2 H30 120.7 . . ?
C58 N10 C59 118.7(12) . . ?
C58 N10 H25 120.6 . . ?
C59 N10 H25 120.6 . . ?
C16 N4 C17 119.8(12) . . ?
C16 N4 H28 120.1 . . ?
C17 N4 H28 120.1 . . ?
C32 N7 C33 123.8(11) . . ?
C32 N7 H12 118.1 . . ?
C33 N7 H12 118.1 . . ?
C69 N13 C70 122.7(13) . . ?
C69 N13 H23 118.7 . . ?
C70 N13 H23 118.7 . . ?
C22 N5 C23 125.2(12) . . ?
C22 N5 H24 117.4 . . ?
C23 N5 H24 117.4 . . ?
C46 O26 C47 119.0(13) . . ?
C87 N16 C88 123.7(13) . . ?
C87 N16 H26 118.2 . . ?
C88 N16 H26 118.2 . . ?
C52 N9 C53 122.3(13) . . ?
C52 N9 H22 118.8 . . ?
C53 N9 H22 118.8 . . ?
C93 O13 C94 116.8(13) . . ?
C84 O10 C83 113.3(11) . . ?
O17 N3 O18 123.2(19) . . ?
O17 N3 C15 121.0(16) . . ?
O18 N3 C15 115.8(18) . . ?
N10 C59 C60 111.9(11) . . ?
N10 C59 C63 111.1(12) . . ?
C60 C59 C63 110.9(12) . . ?
N10 C59 H59 107.6 . . ?
C60 C59 H59 107.6 . . ?
C63 C59 H59 107.6 . . ?
O8 C73 N14 122.2(13) . . ?
O8 C73 C70 116.9(13) . . ?
N14 C73 C70 120.8(13) . . ?
O2 C52 O1 126.6(14) . . ?
O2 C52 N9 123.2(15) . . ?
O1 C52 N9 110.2(14) . . ?
O15 C5 N1 127.2(15) . . ?
O15 C5 O14 124.7(15) . . ?
N1 C5 O14 108.0(15) . . ?
O5 N11 O4 121.3(19) . . ?
O5 N11 C62 122.1(17) . . ?
O4 N11 C62 116.7(18) . . ?
O11 C87 N16 120.4(14) . . ?
O11 C87 C96 119.8(15) . . ?
N16 C87 C96 119.7(14) . . ?
N14 C74 C79 109.4(11) . . ?
N14 C74 C75 110.8(11) . . ?
C79 C74 C75 109.2(12) . . ?
N14 C74 H74 109.1 . . ?
C79 C74 H74 109.1 . . ?
C75 C74 H74 109.1 . . ?
O3 C58 N10 121.5(14) . . ?
O3 C58 C53 118.9(13) . . ?
N10 C58 C53 119.6(13) . . ?
N15 C96 C87 113.0(12) . . ?
N15 C96 C81 107.8(11) . . ?
C87 C96 C81 108.6(11) . . ?
N15 C96 H96 109.1 . . ?
C87 C96 H96 109.1 . . ?
C81 C96 H96 109.1 . . ?
C61 C60 C59 114.5(12) . . ?
C61 C60 H60A 108.6 . . ?
C59 C60 H60A 108.6 . . ?
C61 C60 H60B 108.6 . . ?
C59 C60 H60B 108.6 . . ?
H60A C60 H60B 107.6 . . ?
C77 C75 C74 118.0(12) . . ?
C77 C75 H75A 107.8 . . ?
C74 C75 H75A 107.8 . . ?
C77 C75 H75B 107.8 . . ?
C74 C75 H75B 107.8 . . ?
H75A C75 H75B 107.1 . . ?
O22 C32 N7 120.9(13) . . ?
O22 C32 C27 121.3(13) . . ?
N7 C32 C27 117.4(12) . . ?
C35 C34 C33 115.5(11) . . ?
C35 C34 H34A 108.4 . . ?
C33 C34 H34A 108.4 . . ?
C35 C34 H34B 108.4 . . ?
C33 C34 H34B 108.4 . . ?
H34A C34 H34B 107.5 . . ?
C60 C61 C62 115.1(13) . . ?
C60 C61 H61A 108.5 . . ?
C62 C61 H61A 108.5 . . ?
C60 C61 H61B 108.5 . . ?
C62 C61 H61B 108.5 . . ?
H61A C61 H61B 107.5 . . ?
O9 C79 N15 121.7(14) . . ?
O9 C79 C74 122.0(14) . . ?
N15 C79 C74 115.9(13) . . ?
C14 C13 C12 110.2(11) . . ?
C14 C13 H13A 109.6 . . ?
C12 C13 H13A 109.6 . . ?
C14 C13 H13B 109.6 . . ?
C12 C13 H13B 109.6 . . ?
H13A C13 H13B 108.1 . . ?
N2 C12 C16 109.7(11) . . ?
N2 C12 C13 111.0(11) . . ?
C16 C12 C13 109.2(11) . . ?
N2 C12 H9 109.0 . . ?
C16 C12 H9 109.0 . . ?
C13 C12 H9 109.0 . . ?
N7 C33 C40 113.7(13) . . ?
N7 C33 C34 109.0(11) . . ?
C40 C33 C34 108.2(11) . . ?
N7 C33 H33 108.6 . . ?
C40 C33 H33 108.6 . . ?
C34 C33 H33 108.6 . . ?
O21 C26 N6 121.6(14) . . ?
O21 C26 C23 118.5(14) . . ?
N6 C26 C23 119.8(13) . . ?
C27 C28 C29 117.6(13) . . ?
C27 C28 H28A 107.9 . . ?
C29 C28 H28A 107.9 . . ?
C27 C28 H28B 107.9 . . ?
C29 C28 H28B 107.9 . . ?
H28A C28 H28B 107.2 . . ?
O25 C46 O26 123.6(17) . . ?
O25 C46 C41 124.9(17) . . ?
O26 C46 C41 111.0(15) . . ?
O24 C40 N8 124.2(14) . . ?
O24 C40 C33 118.9(15) . . ?
N8 C40 C33 116.8(14) . . ?
C31 C29 C30 110.9(14) . . ?
C31 C29 C28 110.9(12) . . ?
C30 C29 C28 109.6(13) . . ?
C31 C29 H65 108.4 . . ?
C30 C29 H65 108.4 . . ?
C28 C29 H65 108.4 . . ?
N11 C62 C61 111.7(14) . . ?
N11 C62 H62A 109.3 . . ?
C61 C62 H62A 109.3 . . ?
N11 C62 H62B 109.3 . . ?
C61 C62 H62B 109.3 . . ?
H62A C62 H62B 107.9 . . ?
O6 C63 N12 123.3(13) . . ?
O6 C63 C59 119.5(13) . . ?
N12 C63 C59 117.2(13) . . ?
C6 C7 C8 113.6(12) . . ?
C6 C7 H7A 108.8 . . ?
C8 C7 H7A 108.8 . . ?
C6 C7 H7B 108.8 . . ?
C8 C7 H7B 108.8 . . ?
H7A C7 H7B 107.7 . . ?
N6 C27 C28 109.0(11) . . ?
N6 C27 C32 110.3(12) . . ?
C28 C27 C32 109.6(12) . . ?
N6 C27 H27 109.3 . . ?
C28 C27 H27 109.3 . . ?
C32 C27 H27 109.3 . . ?
N1 C6 C11 112.4(12) . . ?
N1 C6 C7 107.1(12) . . ?
C11 C6 C7 109.7(12) . . ?
N1 C6 H11 109.2 . . ?
C11 C6 H11 109.2 . . ?
C7 C6 H11 109.2 . . ?
C17 C18 C19 112.8(13) . . ?
C17 C18 H18A 109.0 . . ?
C19 C18 H18A 109.0 . . ?
C17 C18 H18B 109.0 . . ?
C19 C18 H18B 109.0 . . ?
H18A C18 H18B 107.8 . . ?
O16 C11 N2 121.0(15) . . ?
O16 C11 C6 119.0(13) . . ?
N2 C11 C6 120.0(13) . . ?
N16 C88 C93 111.8(13) . . ?
N16 C88 C89 110.2(12) . . ?
C93 C88 C89 108.4(13) . . ?
N16 C88 H88 108.8 . . ?
C93 C88 H88 108.8 . . ?
C89 C88 H88 108.8 . . ?
N4 C17 C18 111.9(12) . . ?
N4 C17 C22 111.8(12) . . ?
C18 C17 C22 106.7(12) . . ?
N4 C17 H21 108.8 . . ?
C18 C17 H21 108.8 . . ?
C22 C17 H21 108.8 . . ?
O12 C93 O13 123.8(16) . . ?
O12 C93 C88 123.7(17) . . ?
O13 C93 C88 112.1(16) . . ?
O19 C16 N4 120.1(14) . . ?
O19 C16 C12 121.8(13) . . ?
N4 C16 C12 117.8(14) . . ?
N9 C53 C58 113.5(12) . . ?
N9 C53 C54 111.7(12) . . ?
C58 C53 C54 109.4(13) . . ?
N9 C53 H53 107.3 . . ?
C58 C53 H53 107.3 . . ?
C54 C53 H53 107.3 . . ?
O1 C50 C48 112.6(14) . . ?
O1 C50 C49 113.4(13) . . ?
C48 C50 C49 112.3(14) . . ?
O1 C50 C51 100.7(12) . . ?
C48 C50 C51 107.4(14) . . ?
C49 C50 C51 109.8(14) . . ?
N12 C64 C66 113.5(12) . . ?
N12 C64 C69 113.1(12) . . ?
C66 C64 C69 110.5(13) . . ?
N12 C64 H64 106.4 . . ?
C66 C64 H64 106.4 . . ?
C69 C64 H64 106.4 . . ?
N5 C23 C25 110.1(12) . . ?
N5 C23 C24 109.2(13) . . ?
C25 C23 C24 112.4(14) . . ?
N5 C23 C26 107.1(12) . . ?
C25 C23 C26 108.4(14) . . ?
C24 C23 C26 109.6(12) . . ?
C45 C43 C42 109.3(14) . . ?
C45 C43 C44 110.4(13) . . ?
C42 C43 C44 113.0(13) . . ?
C45 C43 H43 108.0 . . ?
C42 C43 H43 108.0 . . ?
C44 C43 H43 108.0 . . ?
N8 C41 C42 111.5(12) . . ?
N8 C41 C46 111.5(13) . . ?
C42 C41 C46 109.0(12) . . ?
N8 C41 H41 108.2 . . ?
C42 C41 H41 108.2 . . ?
C46 C41 H41 108.2 . . ?
O20 C22 N5 121.3(15) . . ?
O20 C22 C17 120.5(15) . . ?
N5 C22 C17 117.7(14) . . ?
C55 C56 H56A 109.5 . . ?
C55 C56 H56B 109.5 . . ?
H56A C56 H56B 109.5 . . ?
C55 C56 H56C 109.5 . . ?
H56A C56 H56C 109.5 . . ?
H56B C56 H56C 109.5 . . ?
O10 C83 C82 105.4(11) . . ?
O10 C83 H83A 110.7 . . ?
C82 C83 H83A 110.7 . . ?
O10 C83 H83B 110.7 . . ?
C82 C83 H83B 110.7 . . ?
H83A C83 H83B 108.8 . . ?
O10 C84 C86 116.0(14) . . ?
O10 C84 H84A 108.3 . . ?
C86 C84 H84A 108.3 . . ?
O10 C84 H84B 108.3 . . ?
C86 C84 H84B 108.3 . . ?
H84A C84 H84B 107.4 . . ?
C8 C9 H20 109.5 . . ?
C8 C9 H9B 109.5 . . ?
H20 C9 H9B 109.5 . . ?
C8 C9 H9C 109.5 . . ?
H20 C9 H9C 109.5 . . ?
H9B C9 H9C 109.5 . . ?
C81 C82 C83 107.7(12) . . ?
C81 C82 H82A 110.2 . . ?
C83 C82 H82A 110.2 . . ?
C81 C82 H82B 110.2 . . ?
C83 C82 H82B 110.2 . . ?
H82A C82 H82B 108.5 . . ?
C55 C54 C53 117.5(12) . . ?
C55 C54 H54A 107.9 . . ?
C53 C54 H54A 107.9 . . ?
C55 C54 H54B 107.9 . . ?
C53 C54 H54B 107.9 . . ?
H54A C54 H54B 107.2 . . ?
C91 C90 C89 108.9(13) . . ?
C91 C90 C92 112.0(13) . . ?
C89 C90 C92 111.3(13) . . ?
C91 C90 H90 108.2 . . ?
C89 C90 H90 108.2 . . ?
C92 C90 H90 108.2 . . ?
C82 C81 C96 114.4(12) . . ?
C82 C81 H81A 108.7 . . ?
C96 C81 H81A 108.7 . . ?
C82 C81 H81B 108.7 . . ?
C96 C81 H81B 108.7 . . ?
H81A C81 H81B 107.6 . . ?
O7 C69 N13 125.9(16) . . ?
O7 C69 C64 119.6(16) . . ?
N13 C69 C64 114.4(15) . . ?
C34 C35 C36 110.7(11) . . ?
C34 C35 H35A 109.5 . . ?
C36 C35 H35A 109.5 . . ?
C34 C35 H35B 109.5 . . ?
C36 C35 H35B 109.5 . . ?
H35A C35 H35B 108.1 . . ?
O23 C36 C35 106.7(11) . . ?
O23 C36 H36A 110.4 . . ?
C35 C36 H36A 110.4 . . ?
O23 C36 H36B 110.4 . . ?
C35 C36 H36B 110.4 . . ?
H36A C36 H36B 108.6 . . ?
C57 C55 C54 107.8(13) . . ?
C57 C55 C56 110.5(13) . . ?
C54 C55 C56 110.2(13) . . ?
C57 C55 H55 109.4 . . ?
C54 C55 H55 109.4 . . ?
C56 C55 H55 109.4 . . ?
C2 C4 H4A 109.5 . . ?
C2 C4 H4B 109.5 . . ?
H4A C4 H4B 109.5 . . ?
C2 C4 H4C 109.5 . . ?
H4A C4 H4C 109.5 . . ?
H4B C4 H4C 109.5 . . ?
C21 C19 C20 113.1(15) . . ?
C21 C19 C18 112.8(14) . . ?
C20 C19 C18 107.3(14) . . ?
C21 C19 H19 107.8 . . ?
C20 C19 H19 107.8 . . ?
C18 C19 H19 107.8 . . ?
C9 C8 C7 114.7(13) . . ?
C9 C8 C10 108.5(13) . . ?
C7 C8 C10 105.5(12) . . ?
C9 C8 H3 109.3 . . ?
C7 C8 H3 109.3 . . ?
C10 C8 H3 109.3 . . ?
C67 C65 C66 113.3(15) . . ?
C67 C65 C68 111.2(16) . . ?
C66 C65 C68 109.7(14) . . ?
C67 C65 H100 107.5 . . ?
C66 C65 H100 107.5 . . ?
C68 C65 H100 107.5 . . ?
N13 C70 C72 108.3(12) . . ?
N13 C70 C71 109.6(13) . . ?
C72 C70 C71 112.6(14) . . ?
N13 C70 C73 107.7(12) . . ?
C72 C70 C73 105.8(13) . . ?
C71 C70 C73 112.6(12) . . ?
C13 C14 C15 110.8(12) . . ?
C13 C14 H14A 109.5 . . ?
C15 C14 H14A 109.5 . . ?
C13 C14 H14B 109.5 . . ?
C15 C14 H14B 109.5 . . ?
H14A C14 H14B 108.1 . . ?
C64 C66 C65 116.3(14) . . ?
C64 C66 H66A 108.2 . . ?
C65 C66 H66A 108.2 . . ?
C64 C66 H66B 108.2 . . ?
C65 C66 H66B 108.2 . . ?
H66A C66 H66B 107.4 . . ?
O14 C2 C4 112.2(13) . . ?
O14 C2 C3 109.8(14) . . ?
C4 C2 C3 114.9(14) . . ?
O14 C2 C1 99.7(12) . . ?
C4 C2 C1 109.8(14) . . ?
C3 C2 C1 109.3(14) . . ?
C75 C77 C78 111.0(13) . . ?
C75 C77 C76 110.0(13) . . ?
C78 C77 C76 110.3(14) . . ?
C75 C77 H77 108.5 . . ?
C78 C77 H77 108.5 . . ?
C76 C77 H77 108.5 . . ?
C85 C86 C84 175.9(19) . . ?
C29 C30 H30A 109.5 . . ?
C29 C30 H30B 109.5 . . ?
H30A C30 H30B 109.5 . . ?
C29 C30 H30C 109.5 . . ?
H30A C30 H30C 109.5 . . ?
H30B C30 H30C 109.5 . . ?
C41 C42 C43 113.6(13) . . ?
C41 C42 H42A 108.9 . . ?
C43 C42 H42A 108.9 . . ?
C41 C42 H42B 108.9 . . ?
C43 C42 H42B 108.9 . . ?
H42A C42 H42B 107.7 . . ?
N3 C15 C14 112.5(14) . . ?
N3 C15 H15A 109.1 . . ?
C14 C15 H15A 109.1 . . ?
N3 C15 H15B 109.1 . . ?
C14 C15 H15B 109.1 . . ?
H15A C15 H15B 107.8 . . ?
C50 C49 H49A 109.5 . . ?
C50 C49 H49B 109.5 . . ?
H49A C49 H49B 109.5 . . ?
C50 C49 H49C 109.5 . . ?
H49A C49 H49C 109.5 . . ?
H49B C49 H49C 109.5 . . ?
C70 C71 H71A 109.5 . . ?
C70 C71 H71B 109.5 . . ?
H71A C71 H71B 109.5 . . ?
C70 C71 H71C 109.5 . . ?
H71A C71 H71C 109.5 . . ?
H71B C71 H71C 109.5 . . ?
C88 C89 C90 114.0(13) . . ?
C88 C89 H89A 108.8 . . ?
C90 C89 H89A 108.8 . . ?
C88 C89 H89B 108.8 . . ?
C90 C89 H89B 108.8 . . ?
H89A C89 H89B 107.6 . . ?
C39 C38 C37 177(2) . . ?
C90 C92 H92A 109.5 . . ?
C90 C92 H92B 109.5 . . ?
H92A C92 H92B 109.5 . . ?
C90 C92 H92C 109.5 . . ?
H92A C92 H92C 109.5 . . ?
H92B C92 H92C 109.5 . . ?
C55 C57 H57A 109.5 . . ?
C55 C57 H57B 109.5 . . ?
H57A C57 H57B 109.5 . . ?
C55 C57 H57C 109.5 . . ?
H57A C57 H57C 109.5 . . ?
H57B C57 H57C 109.5 . . ?
C50 C48 H48A 109.5 . . ?
C50 C48 H48B 109.5 . . ?
H48A C48 H48B 109.5 . . ?
C50 C48 H48C 109.5 . . ?
H48A C48 H48C 109.5 . . ?
H48B C48 H48C 109.5 . . ?
C2 C3 H3A 109.5 . . ?
C2 C3 H3B 109.5 . . ?
H3A C3 H3B 109.5 . . ?
C2 C3 H3C 109.5 . . ?
H3A C3 H3C 109.5 . . ?
H3B C3 H3C 109.5 . . ?
C23 C24 H24A 109.5 . . ?
C23 C24 H24B 109.5 . . ?
H24A C24 H24B 109.5 . . ?
C23 C24 H24C 109.5 . . ?
H24A C24 H24C 109.5 . . ?
H24B C24 H24C 109.5 . . ?
C19 C20 H20A 109.5 . . ?
C19 C20 H20B 109.5 . . ?
H20A C20 H20B 109.5 . . ?
C19 C20 H20C 109.5 . . ?
H20A C20 H20C 109.5 . . ?
H20B C20 H20C 109.5 . . ?
C77 C76 H76A 109.5 . . ?
C77 C76 H76B 109.5 . . ?
H76A C76 H76B 109.5 . . ?
C77 C76 H76C 109.5 . . ?
H76A C76 H76C 109.5 . . ?
H76B C76 H76C 109.5 . . ?
O23 C37 C38 113.3(13) . . ?
O23 C37 H37A 108.9 . . ?
C38 C37 H37A 108.9 . . ?
O23 C37 H37B 108.9 . . ?
C38 C37 H37B 108.9 . . ?
H37A C37 H37B 107.7 . . ?
C70 C72 H72A 109.5 . . ?
C70 C72 H72B 109.5 . . ?
H72A C72 H72B 109.5 . . ?
C70 C72 H72C 109.5 . . ?
H72A C72 H72C 109.5 . . ?
H72B C72 H72C 109.5 . . ?
C23 C25 H25A 109.5 . . ?
C23 C25 H25B 109.5 . . ?
H25A C25 H25B 109.5 . . ?
C23 C25 H25C 109.5 . . ?
H25A C25 H25C 109.5 . . ?
H25B C25 H25C 109.5 . . ?
C65 C68 H68A 109.5 . . ?
C65 C68 H68B 109.5 . . ?
H68A C68 H68B 109.5 . . ?
C65 C68 H68C 109.5 . . ?
H68A C68 H68C 109.5 . . ?
H68B C68 H68C 109.5 . . ?
C43 C44 H44A 109.5 . . ?
C43 C44 H44B 109.5 . . ?
H44A C44 H44B 109.5 . . ?
C43 C44 H44C 109.5 . . ?
H44A C44 H44C 109.5 . . ?
H44B C44 H44C 109.5 . . ?
C90 C91 H91A 109.5 . . ?
C90 C91 H91B 109.5 . . ?
H91A C91 H91B 109.5 . . ?
C90 C91 H91C 109.5 . . ?
H91A C91 H91C 109.5 . . ?
H91B C91 H91C 109.5 . . ?
C77 C78 H78A 109.5 . . ?
C77 C78 H78B 109.5 . . ?
H78A C78 H78B 109.5 . . ?
C77 C78 H78C 109.5 . . ?
H78A C78 H78C 109.5 . . ?
H78B C78 H78C 109.5 . . ?
C50 C51 H51A 109.5 . . ?
C50 C51 H51B 109.5 . . ?
H51A C51 H51B 109.5 . . ?
C50 C51 H51C 109.5 . . ?
H51A C51 H51C 109.5 . . ?
H51B C51 H51C 109.5 . . ?
C2 C1 H1A 109.5 . . ?
C2 C1 H1B 109.5 . . ?
H1A C1 H1B 109.5 . . ?
C2 C1 H1C 109.5 . . ?
H1A C1 H1C 109.5 . . ?
H1B C1 H1C 109.5 . . ?
O26 C47 H47A 109.5 . . ?
O26 C47 H47B 109.5 . . ?
H47A C47 H47B 109.5 . . ?
O26 C47 H47C 109.5 . . ?
H47A C47 H47C 109.5 . . ?
H47B C47 H47C 109.5 . . ?
C86 C85 H85 180.0 . . ?
C8 C10 H10A 109.5 . . ?
C8 C10 H10B 109.5 . . ?
H10A C10 H10B 109.5 . . ?
C8 C10 H10C 109.5 . . ?
H10A C10 H10C 109.5 . . ?
H10B C10 H10C 109.5 . . ?
C19 C21 H21A 109.5 . . ?
C19 C21 H21B 109.5 . . ?
H21A C21 H21B 109.5 . . ?
C19 C21 H21C 109.5 . . ?
H21A C21 H21C 109.5 . . ?
H21B C21 H21C 109.5 . . ?
C43 C45 H45A 109.5 . . ?
C43 C45 H45B 109.5 . . ?
H45A C45 H45B 109.5 . . ?
C43 C45 H45C 109.5 . . ?
H45A C45 H45C 109.5 . . ?
H45B C45 H45C 109.5 . . ?
O13 C94 H94A 109.5 . . ?
O13 C94 H94B 109.5 . . ?
H94A C94 H94B 109.5 . . ?
O13 C94 H94C 109.5 . . ?
H94A C94 H94C 109.5 . . ?
H94B C94 H94C 109.5 . . ?
C38 C39 H39 180.0 . . ?
C29 C31 H31A 109.5 . . ?
C29 C31 H31B 109.5 . . ?
H31A C31 H31B 109.5 . . ?
C29 C31 H31C 109.5 . . ?
H31A C31 H31C 109.5 . . ?
H31B C31 H31C 109.5 . . ?
C65 C67 H67A 109.5 . . ?
C65 C67 H67B 109.5 . . ?
H67A C67 H67B 109.5 . . ?
C65 C67 H67C 109.5 . . ?
H67A C67 H67C 109.5 . . ?
H67B C67 H67C 109.5 . . ?
 
_refine_diff_density_max    0.291
_refine_diff_density_min   -0.286
_refine_diff_density_rms    0.065

_shelx_res_file
;

    data_a_a.res created by SHELXL-2014/7

TITL data_a_a.res in P2(1)
CELL  0.71073  14.8849  20.4720  18.0041   90.000   91.102   90.000
ZERR    1.000   0.0061   0.0071   0.0067    0.000    0.013    0.000
LATT -1
SYMM -X, 1/2+Y, -Z
SFAC C  H  N  O
UNIT 1  1  1  1
L.S. 4
ACTA
BOND $H
FMAP 2
PLAN 20
TEMP 23.000
WGHT    0.100000    0.560370
FVAR       0.32515
O19   4    0.560908    0.761365   -0.069371    11.00000    0.06169    0.02205 =
         0.04761   -0.00047    0.00234    0.01016
O2    4    0.988003    0.142795    0.679545    11.00000    0.04368    0.01941 =
         0.07080    0.00689   -0.00104    0.00393
O6    4    0.939237    0.237554    0.430196    11.00000    0.05953    0.01586 =
         0.05205    0.00570    0.00481    0.00132
O14   4    0.474750    0.953492    0.231939    11.00000    0.06053    0.02926 =
         0.05072   -0.01058    0.00289    0.00042
O1    4    1.025171    0.046136    0.733212    11.00000    0.06173    0.02791 =
         0.05772    0.01884    0.01452   -0.00371
O22   4    0.526908    0.510751   -0.069703    11.00000    0.05267    0.01989 =
         0.04569   -0.00427   -0.00026   -0.00010
O24   4    0.751769    0.513825   -0.144059    11.00000    0.05537    0.01747 =
         0.06603    0.00588    0.00604    0.00760
O16   4    0.393431    0.771049    0.041618    11.00000    0.05323    0.01303 =
         0.07427   -0.00081    0.01594    0.00473
O3    4    1.105449    0.228474    0.542136    11.00000    0.04896    0.01447 =
         0.06942    0.00406   -0.00826    0.00372
O11   4    0.747168    0.486117    0.356454    11.00000    0.06152    0.03021 =
         0.05723   -0.00097   -0.00307    0.00918
O9    4    0.973046    0.488704    0.430316    11.00000    0.05831    0.01675 =
         0.04983    0.00340    0.00992    0.00372
O20   4    0.686468    0.671435    0.060358    11.00000    0.07624    0.01924 =
         0.06833   -0.00780   -0.01376    0.00557
O15   4    0.511595    0.856615    0.179238    11.00000    0.06518    0.02116 =
         0.06680   -0.01053    0.00103    0.01028
N14   3    1.029443    0.360501    0.547932    11.00000    0.05324    0.01530 =
         0.03711    0.00015    0.00958   -0.00284
AFIX  43
H31   2    1.041440    0.319668    0.542872    11.00000   -1.20000
AFIX   0
O23   4    0.890412    0.713482   -0.262889    11.00000    0.05528    0.03128 =
         0.07195   -0.00624    0.03734   -0.00858
O8    4    0.965455    0.439190    0.616160    11.00000    0.08797    0.02459 =
         0.05109    0.00068    0.01856   -0.00051
O7    4    0.810673    0.327241    0.558912    11.00000    0.06673    0.02481 =
         0.07491    0.01437    0.02729    0.02066
O21   4    0.533210    0.561029    0.115165    11.00000    0.08570    0.02729 =
         0.04329    0.00806   -0.00467    0.00552
N6    3    0.468808    0.637910    0.048385    11.00000    0.05138    0.02270 =
         0.04170    0.00597   -0.00059    0.01093
AFIX  43
H8    2    0.454371    0.678431    0.044124    11.00000   -1.20000
AFIX   0
N1    3    0.373700    0.903161    0.165910    11.00000    0.04156    0.02791 =
         0.05287   -0.00830    0.00410   -0.00379
AFIX  43
H18   2    0.342306    0.938073    0.171097    11.00000   -1.20000
AFIX   0
N12   3    0.897285    0.172403    0.522611    11.00000    0.04986    0.01349 =
         0.05480    0.01062    0.00554   -0.00605
AFIX  43
H6    2    0.907612    0.137057    0.547138    11.00000   -1.20000
AFIX   0
N15   3    0.922641    0.384961    0.424631    11.00000    0.03914    0.02406 =
         0.03968   -0.00162   -0.00275   -0.01223
AFIX  43
H29   2    0.927718    0.345755    0.441344    11.00000   -1.20000
AFIX   0
N8    3    0.739194    0.556472   -0.030711    11.00000    0.04273    0.02521 =
         0.04280    0.00760    0.00320    0.01392
AFIX  43
H70   2    0.705529    0.578146   -0.001248    11.00000   -1.20000
AFIX   0
N2    3    0.424714    0.874716    0.018575    11.00000    0.04695    0.01074 =
         0.05187    0.00379    0.01341   -0.00203
AFIX  43
H30   2    0.422659    0.914928    0.032260    11.00000   -1.20000
AFIX   0
N10   3    1.074782    0.124819    0.518860    11.00000    0.04628    0.01736 =
         0.05084   -0.00063   -0.01312   -0.00236
AFIX  43
H25   2    1.077913    0.084534    0.532201    11.00000   -1.20000
AFIX   0
N4    3    0.602267    0.827367    0.021744    11.00000    0.04967    0.01666 =
         0.06606    0.00218    0.00177    0.00556
AFIX  43
H28   2    0.593660    0.862655    0.046527    11.00000   -1.20000
AFIX   0
N7    3    0.577880    0.614257   -0.076348    11.00000    0.03142    0.02491 =
         0.04588   -0.00621   -0.00185   -0.00267
AFIX  43
H12   2    0.572903    0.653577   -0.060126    11.00000   -1.20000
AFIX   0
N13   3    0.917163    0.273623    0.623646    11.00000    0.05891    0.01584 =
         0.06085   -0.00141    0.00676   -0.00188
AFIX  43
H23   2    0.941706    0.236120    0.631224    11.00000   -1.20000
AFIX   0
N5    3    0.580836    0.725075    0.123374    11.00000    0.06228    0.01188 =
         0.04975   -0.00781   -0.01756    0.01118
AFIX  43
H24   2    0.555372    0.762324    0.129656    11.00000   -1.20000
AFIX   0
O26   4    0.735645    0.508403    0.107348    11.00000    0.08457    0.05411 =
         0.06245    0.01871    0.01564    0.02125
N16   3    0.760771    0.442999    0.469967    11.00000    0.04512    0.01834 =
         0.05546    0.00275    0.00177    0.01030
AFIX  43
H26   2    0.794122    0.420921    0.500355    11.00000   -1.20000
AFIX   0
N9    3    1.125366    0.097640    0.666744    11.00000    0.06158    0.01397 =
         0.05230    0.00816   -0.00859    0.00003
AFIX  43
H22   2    1.157525    0.063244    0.673990    11.00000   -1.20000
AFIX   0
O13   4    0.763912    0.490649    0.606350    11.00000    0.09400    0.07431 =
         0.05631   -0.02062   -0.00169    0.02563
O10   4    0.609578    0.285734    0.237567    11.00000    0.05279    0.03572 =
         0.07983   -0.00364   -0.02134   -0.00839
N3    3    0.652140    0.988244   -0.174871    11.00000    0.07433    0.04013 =
         0.09326   -0.00181    0.02572   -0.00084
C59   1    1.028585    0.142925    0.452676    11.00000    0.04693    0.01354 =
         0.04357    0.00600   -0.00428   -0.00519
AFIX  13
H59   2    1.070984    0.166760    0.421727    11.00000   -1.20000
AFIX   0
O25   4    0.835885    0.433606    0.077722    11.00000    0.11783    0.03852 =
         0.11104    0.02452   -0.00013    0.04866
C73   1    0.984863    0.379493    0.605174    11.00000    0.06120    0.02283 =
         0.03144   -0.00123    0.00226   -0.00553
C52   1    1.040287    0.098737    0.692437    11.00000    0.03890    0.06145 =
         0.03491   -0.00570    0.01157   -0.00725
C5    1    0.457621    0.899657    0.190926    11.00000    0.06920    0.03749 =
         0.03610    0.00632   -0.00343   -0.01244
N11   3    0.848617    0.011788    0.324761    11.00000    0.07272    0.04537 =
         0.10619   -0.00665   -0.03557   -0.00487
C87   1    0.784315    0.445970    0.400102    11.00000    0.03228    0.02979 =
         0.05484   -0.00469    0.00209   -0.01871
C74   1    1.059232    0.405603    0.492947    11.00000    0.03443    0.02771 =
         0.05210   -0.00960    0.00018   -0.00174
AFIX  13
H74   2    1.089225    0.442501    0.517671    11.00000   -1.20000
AFIX   0
C58   1    1.112227    0.169993    0.558938    11.00000    0.03678    0.02375 =
         0.07436   -0.00350   -0.01260    0.00455
C96   1    0.852615    0.399134    0.371470    11.00000    0.03445    0.01550 =
         0.04278   -0.00280    0.00417   -0.00517
AFIX  13
H96   2    0.879233    0.417402    0.326646    11.00000   -1.20000
AFIX   0
C60   1    0.996960    0.084757    0.409562    11.00000    0.04855    0.02575 =
         0.03923    0.01142   -0.00326    0.00348
AFIX  23
H60A  2    1.047004    0.054883    0.404224    11.00000   -1.20000
H60B  2    0.951350    0.062476    0.437810    11.00000   -1.20000
AFIX   0
C75   1    1.124721    0.372974    0.440574    11.00000    0.04536    0.02439 =
         0.04613    0.01078    0.00446    0.00336
AFIX  23
H75A  2    1.098047    0.332160    0.423939    11.00000   -1.20000
H75B  2    1.130109    0.400685    0.397186    11.00000   -1.20000
AFIX   0
O12   4    0.663516    0.566057    0.576725    11.00000    0.12866    0.05808 =
         0.08037   -0.01054    0.00217    0.04808
C32   1    0.519892    0.568788   -0.051307    11.00000    0.04886    0.02894 =
         0.03247    0.00270    0.00307    0.00422
C34   1    0.694383    0.664537   -0.147374    11.00000    0.03440    0.01803 =
         0.06221    0.01499    0.00636    0.00039
AFIX  23
H34A  2    0.649627    0.695665   -0.164855    11.00000   -1.20000
H34B  2    0.721621    0.682191   -0.102300    11.00000   -1.20000
AFIX   0
C61   1    0.960084    0.099641    0.336163    11.00000    0.06280    0.03063 =
         0.04766   -0.00173    0.00556    0.00769
AFIX  23
H61A  2    1.005568    0.122352    0.308211    11.00000   -1.20000
H61B  2    0.909800    0.129275    0.341657    11.00000   -1.20000
AFIX   0
C79   1    0.980218    0.430187    0.449184    11.00000    0.04035    0.04343 =
         0.03548   -0.00789    0.02303   -0.00018
C13   1    0.503553    0.916841   -0.089468    11.00000    0.03503    0.02437 =
         0.06106    0.00595    0.01474    0.01268
AFIX  23
H13A  2    0.455372    0.948264   -0.096546    11.00000   -1.20000
H13B  2    0.550679    0.937295   -0.059662    11.00000   -1.20000
AFIX   0
C12   1    0.468018    0.856477   -0.048811    11.00000    0.04039    0.01535 =
         0.04194   -0.00999    0.00224   -0.00589
AFIX  13
H9    2    0.424543    0.833864   -0.081287    11.00000   -1.20000
AFIX   0
C33   1    0.646687    0.600762   -0.128019    11.00000    0.02332    0.02534 =
         0.07171   -0.01512   -0.00080    0.00631
AFIX  13
H33   2    0.618786    0.582960   -0.173420    11.00000   -1.20000
AFIX   0
O18   4    0.663466    1.045253   -0.188854    11.00000    0.08373    0.05821 =
         0.15580    0.00643    0.01186   -0.01589
C26   1    0.514630    0.619610    0.104432    11.00000    0.07096    0.01908 =
         0.05086    0.00316   -0.00272    0.00156
C28   1    0.375879    0.626012   -0.059654    11.00000    0.03911    0.02207 =
         0.05342   -0.00168    0.00935    0.00050
AFIX  23
H28A  2    0.369835    0.599658   -0.104244    11.00000   -1.20000
H28B  2    0.402281    0.667328   -0.074044    11.00000   -1.20000
AFIX   0
C46   1    0.797058    0.481381    0.063112    11.00000    0.05487    0.05050 =
         0.05266   -0.00606   -0.00077   -0.01166
C40   1    0.716927    0.552443   -0.099342    11.00000    0.04270    0.01877 =
         0.06291    0.00430    0.00084   -0.00716
C29   1    0.282399    0.639684   -0.031623    11.00000    0.05507    0.02869 =
         0.05451   -0.01001    0.01560    0.00035
AFIX  13
H65   2    0.287980    0.664647    0.014681    11.00000   -1.20000
AFIX   0
C62   1    0.929093    0.042211    0.292379    11.00000    0.07469    0.02542 =
         0.05981    0.00196   -0.00069   -0.01021
AFIX  23
H62A  2    0.915170    0.055774    0.241835    11.00000   -1.20000
H62B  2    0.977071    0.010211    0.290691    11.00000   -1.20000
AFIX   0
C63   1    0.950686    0.188826    0.468777    11.00000    0.04059    0.02079 =
         0.05019   -0.00098    0.00879   -0.00140
C7    1    0.238338    0.861790    0.109489    11.00000    0.05042    0.03696 =
         0.04680   -0.00036    0.01438   -0.00555
AFIX  23
H7A   2    0.236502    0.898985    0.076119    11.00000   -1.20000
H7B   2    0.207344    0.874040    0.154298    11.00000   -1.20000
AFIX   0
C27   1    0.440190    0.592692   -0.008454    11.00000    0.04144    0.02702 =
         0.04762    0.00485    0.01335   -0.00074
AFIX  13
H27   2    0.410400    0.555362    0.014625    11.00000   -1.20000
AFIX   0
C6    1    0.337077    0.846374    0.129750    11.00000    0.05930    0.01864 =
         0.04238    0.00091   -0.00376   -0.01549
AFIX  13
H11   2    0.339268    0.809448    0.164376    11.00000   -1.20000
AFIX   0
C18   1    0.745465    0.820049    0.089626    11.00000    0.06573    0.02425 =
         0.08284   -0.00835   -0.01350    0.01564
AFIX  23
H18A  2    0.792844    0.789537    0.103235    11.00000   -1.20000
H18B  2    0.715388    0.832709    0.134725    11.00000   -1.20000
AFIX   0
C11   1    0.387931    0.828288    0.059312    11.00000    0.04322    0.02838 =
         0.05864    0.00915    0.00497   -0.00416
C88   1    0.681388    0.474987    0.498814    11.00000    0.03515    0.04633 =
         0.04504   -0.00503    0.00534    0.01375
AFIX  13
H88   2    0.654118    0.501875    0.459394    11.00000   -1.20000
AFIX   0
C17   1    0.679256    0.786529    0.038668    11.00000    0.04166    0.02259 =
         0.05573   -0.00218   -0.01003   -0.00408
AFIX  13
H21   2    0.709131    0.775680   -0.007770    11.00000   -1.20000
AFIX   0
C93   1    0.703430    0.516844    0.562519    11.00000    0.06348    0.05238 =
         0.05055   -0.00563   -0.00327    0.00424
C16   1    0.546059    0.810543   -0.031105    11.00000    0.05211    0.03060 =
         0.04312    0.00282   -0.01252   -0.00813
C53   1    1.163504    0.151718    0.627993    11.00000    0.04435    0.02134 =
         0.06711    0.01725    0.00988   -0.01287
AFIX  13
H53   2    1.162220    0.189471    0.661423    11.00000   -1.20000
AFIX   0
C50   1    0.935621    0.035096    0.760782    11.00000    0.05982    0.03569 =
         0.04855    0.01456    0.01274    0.01273
O5    4    0.797783    0.041804    0.360975    11.00000    0.08378    0.08069 =
         0.25417   -0.08375    0.02079   -0.00254
C64   1    0.822038    0.212223    0.541365    11.00000    0.04152    0.02712 =
         0.06366    0.00831    0.02098    0.00244
AFIX  13
H64   2    0.791122    0.223066    0.494421    11.00000   -1.20000
AFIX   0
C23   1    0.544270    0.669490    0.162844    11.00000    0.07445    0.02254 =
         0.04413   -0.00972   -0.00382    0.01010
C43   1    0.916778    0.621831   -0.039039    11.00000    0.03641    0.04296 =
         0.07892    0.01549   -0.00387    0.00023
AFIX  13
H43   2    0.862793    0.640539   -0.062681    11.00000   -1.20000
AFIX   0
C41   1    0.817868    0.526192   -0.001819    11.00000    0.03922    0.03269 =
         0.06005   -0.00273   -0.00913    0.01284
AFIX  13
H41   2    0.844021    0.499730   -0.041280    11.00000   -1.20000
AFIX   0
C22   1    0.652119    0.722917    0.077280    11.00000    0.06173    0.02624 =
         0.05656   -0.01697   -0.00775    0.00267
C56   1    1.312801    0.256324    0.620023    11.00000    0.07824    0.02552 =
         0.08042    0.01670   -0.02508   -0.00979
AFIX 137
H56A  2    1.336551    0.246047    0.668579    11.00000   -1.50000
H56B  2    1.252527    0.272425    0.624135    11.00000   -1.50000
H56C  2    1.349558    0.289120    0.597600    11.00000   -1.50000
AFIX   0
O4    4    0.836407   -0.047376    0.311409    11.00000    0.08207    0.06806 =
         0.14430   -0.00990   -0.00506   -0.01164
C83   1    0.678217    0.276563    0.292211    11.00000    0.06138    0.02475 =
         0.05907   -0.00182   -0.01606    0.00347
AFIX  23
H83A  2    0.715708    0.239553    0.279719    11.00000   -1.20000
H83B  2    0.652526    0.268997    0.340565    11.00000   -1.20000
AFIX   0
C84   1    0.557258    0.230403    0.225414    11.00000    0.06177    0.03038 =
         0.08568    0.00130   -0.03081   -0.00370
AFIX  23
H84A  2    0.596916    0.194136    0.214758    11.00000   -1.20000
H84B  2    0.519845    0.237718    0.181494    11.00000   -1.20000
AFIX   0
C9    1    0.183721    0.744225    0.118016    11.00000    0.07113    0.02519 =
         0.07918   -0.01585    0.01325   -0.01438
AFIX 137
H20   2    0.163881    0.755138    0.166896    11.00000   -1.50000
H9B   2    0.242296    0.724703    0.121423    11.00000   -1.50000
H9C   2    0.142293    0.713927    0.095366    11.00000   -1.50000
AFIX   0
O17   4    0.701990    0.957658   -0.137905    11.00000    0.09005    0.09488 =
         0.16779    0.05927   -0.01089   -0.01072
C82   1    0.733564    0.340528    0.292352    11.00000    0.04358    0.03828 =
         0.05156    0.00282   -0.00060   -0.00415
AFIX  23
H82A  2    0.760532    0.347068    0.244299    11.00000   -1.20000
H82B  2    0.695033    0.377549    0.302522    11.00000   -1.20000
AFIX   0
C54   1    1.262197    0.139257    0.608968    11.00000    0.04440    0.02403 =
         0.07022    0.00001   -0.01694   -0.00655
AFIX  23
H54A  2    1.294474    0.128730    0.654732    11.00000   -1.20000
H54B  2    1.264363    0.100893    0.577435    11.00000   -1.20000
AFIX   0
C90   1    0.582375    0.376816    0.460993    11.00000    0.04930    0.03670 =
         0.07393   -0.01018    0.00107   -0.00797
AFIX  13
H90   2    0.636118    0.357803    0.439001    11.00000   -1.20000
AFIX   0
C81   1    0.805211    0.334540    0.351576    11.00000    0.04885    0.03316 =
         0.04980   -0.00868   -0.00239   -0.00386
AFIX  23
H81A  2    0.849892    0.303487    0.335204    11.00000   -1.20000
H81B  2    0.778483    0.316977    0.396049    11.00000   -1.20000
AFIX   0
C69   1    0.849378    0.277562    0.577331    11.00000    0.05482    0.04766 =
         0.04778    0.01143    0.01862   -0.00649
C35   1    0.765970    0.658977   -0.205156    11.00000    0.04693    0.01996 =
         0.07604   -0.00139    0.00697   -0.00382
AFIX  23
H35A  2    0.738121    0.649707   -0.253155    11.00000   -1.20000
H35B  2    0.805941    0.623068   -0.192526    11.00000   -1.20000
AFIX   0
C36   1    0.821911    0.724451   -0.209928    11.00000    0.06123    0.02794 =
         0.06621   -0.00997    0.03220   -0.00072
AFIX  23
H36A  2    0.783432    0.760286   -0.225730    11.00000   -1.20000
H36B  2    0.848430    0.735144   -0.161816    11.00000   -1.20000
AFIX   0
C55   1    1.312421    0.193564    0.570871    11.00000    0.05431    0.04341 =
         0.06058    0.00731   -0.00404    0.00406
AFIX  13
H55   2    1.283230    0.203132    0.522843    11.00000   -1.20000
AFIX   0
C4    1    0.632240    0.969636    0.199393    11.00000    0.08664    0.05284 =
         0.04240   -0.01370   -0.00021    0.00395
AFIX 137
H4A   2    0.650717    0.926550    0.185204    11.00000   -1.50000
H4B   2    0.683637    0.994037    0.216591    11.00000   -1.50000
H4C   2    0.605175    0.991340    0.157326    11.00000   -1.50000
AFIX   0
C19   1    0.788839    0.882763    0.053483    11.00000    0.04376    0.03030 =
         0.10417   -0.00425   -0.00545    0.00208
AFIX  13
H19   2    0.740835    0.914809    0.044936    11.00000   -1.20000
AFIX   0
C8    1    0.187878    0.804239    0.072301    11.00000    0.06815    0.02953 =
         0.06251   -0.00064    0.02237   -0.01298
AFIX  13
H3    2    0.215706    0.794033    0.024795    11.00000   -1.20000
AFIX   0
C65   1    0.710931    0.117824    0.553182    11.00000    0.05489    0.02740 =
         0.09411   -0.00470    0.01087    0.00058
AFIX  13
H100  2    0.758210    0.085405    0.545172    11.00000   -1.20000
AFIX   0
C70   1    0.953314    0.330152    0.663285    11.00000    0.07888    0.02402 =
         0.04085   -0.00390    0.00014    0.00360
C14   1    0.540377    0.897302   -0.164516    11.00000    0.06148    0.03715 =
         0.05354   -0.00302    0.01637    0.00474
AFIX  23
H14A  2    0.494095    0.874736   -0.193194    11.00000   -1.20000
H14B  2    0.590508    0.867570   -0.157195    11.00000   -1.20000
AFIX   0
C66   1    0.755249    0.177903    0.587604    11.00000    0.04464    0.04111 =
         0.07192    0.00182    0.00115    0.01833
AFIX  23
H66A  2    0.708424    0.208769    0.600005    11.00000   -1.20000
H66B  2    0.784820    0.164872    0.633743    11.00000   -1.20000
AFIX   0
C2    1    0.565481    0.964925    0.260303    11.00000    0.04939    0.05053 =
         0.05812   -0.01335   -0.00285    0.01123
C77   1    1.217570    0.358449    0.469457    11.00000    0.03891    0.04471 =
         0.05529    0.01425   -0.01049    0.00535
AFIX  13
H77   2    1.212813    0.333449    0.515634    11.00000   -1.20000
AFIX   0
C86   1    0.497780    0.210786    0.287725    11.00000    0.04733    0.04970 =
         0.06142   -0.00399   -0.00494   -0.01575
C30   1    0.231348    0.680120   -0.087454    11.00000    0.05038    0.05048 =
         0.07608   -0.00581   -0.00056    0.02008
AFIX 137
H30A  2    0.242648    0.664120   -0.136518    11.00000   -1.50000
H30B  2    0.250457    0.724805   -0.083680    11.00000   -1.50000
H30C  2    0.168222    0.677350   -0.077946    11.00000   -1.50000
AFIX   0
C42   1    0.886880    0.576169    0.023228    11.00000    0.03225    0.04432 =
         0.08648    0.00350   -0.00594    0.01280
AFIX  23
H42A  2    0.939139    0.553512    0.043371    11.00000   -1.20000
H42B  2    0.861897    0.602214    0.062820    11.00000   -1.20000
AFIX   0
C15   1    0.572077    0.958482   -0.208154    11.00000    0.06128    0.04341 =
         0.05691   -0.00992   -0.00129   -0.00628
AFIX  23
H15A  2    0.584619    0.945914   -0.258856    11.00000   -1.20000
H15B  2    0.523987    0.990457   -0.209749    11.00000   -1.20000
AFIX   0
C49   1    0.865342    0.030629    0.700610    11.00000    0.06008    0.05738 =
         0.06015    0.00554    0.00782    0.00373
AFIX 137
H49A  2    0.809182    0.017963    0.721642    11.00000   -1.50000
H49B  2    0.882989   -0.001319    0.664687    11.00000   -1.50000
H49C  2    0.858704    0.072374    0.676841    11.00000   -1.50000
AFIX   0
C71   1    0.881817    0.358222    0.713613    11.00000    0.09476    0.03696 =
         0.05447   -0.00335    0.03999    0.01732
AFIX 137
H71A  2    0.834079    0.376662    0.683760    11.00000   -1.50000
H71B  2    0.908017    0.391601    0.744584    11.00000   -1.50000
H71C  2    0.858300    0.324091    0.744209    11.00000   -1.50000
AFIX   0
C89   1    0.612781    0.423908    0.523227    11.00000    0.05948    0.03985 =
         0.07377   -0.00260    0.01820    0.01808
AFIX  23
H89A  2    0.560419    0.446300    0.541915    11.00000   -1.20000
H89B  2    0.638822    0.398619    0.563797    11.00000   -1.20000
AFIX   0
C38   1    1.000209    0.789803   -0.211999    11.00000    0.05770    0.05395 =
         0.08920    0.02171    0.04277    0.00699
C92   1    0.528401    0.413508    0.398433    11.00000    0.05332    0.07028 =
         0.07746    0.00891    0.00227   -0.00947
AFIX 137
H92A  2    0.470469    0.425656    0.416467    11.00000   -1.50000
H92B  2    0.520965    0.385364    0.356110    11.00000   -1.50000
H92C  2    0.560620    0.452038    0.384301    11.00000   -1.50000
AFIX   0
C57   1    1.406984    0.170330    0.558525    11.00000    0.04770    0.04981 =
         0.08039    0.00556   -0.00021   -0.02297
AFIX 137
H57A  2    1.437771    0.165589    0.605560    11.00000   -1.50000
H57B  2    1.438058    0.201625    0.528735    11.00000   -1.50000
H57C  2    1.405390    0.128968    0.533412    11.00000   -1.50000
AFIX   0
C48   1    0.911266    0.081893    0.819166    11.00000    0.07747    0.06846 =
         0.06771   -0.01487    0.00982    0.02313
AFIX 137
H48A  2    0.905376    0.124760    0.798011    11.00000   -1.50000
H48B  2    0.957319    0.082325    0.857231    11.00000   -1.50000
H48C  2    0.855226    0.069100    0.840315    11.00000   -1.50000
AFIX   0
C3    1    0.588239    0.916039    0.319721    11.00000    0.10664    0.06005 =
         0.07448    0.01579   -0.00067    0.01024
AFIX 137
H3A   2    0.542872    0.916873    0.356895    11.00000   -1.50000
H3B   2    0.645422    0.926748    0.342092    11.00000   -1.50000
H3C   2    0.590997    0.873186    0.298232    11.00000   -1.50000
AFIX   0
C24   1    0.617088    0.640107    0.212519    11.00000    0.11385    0.02865 =
         0.08511   -0.02120   -0.02516   -0.00526
AFIX 137
H24A  2    0.664995    0.624161    0.182520    11.00000   -1.50000
H24B  2    0.592457    0.604661    0.240484    11.00000   -1.50000
H24C  2    0.639914    0.672897    0.246003    11.00000   -1.50000
AFIX   0
C20   1    0.854385    0.911303    0.110191    11.00000    0.04132    0.04210 =
         0.12066   -0.00897   -0.01102   -0.00120
AFIX 137
H20A  2    0.905156    0.882711    0.115984    11.00000   -1.50000
H20B  2    0.825220    0.915946    0.156994    11.00000   -1.50000
H20C  2    0.874292    0.953329    0.093513    11.00000   -1.50000
AFIX   0
C76   1    1.266815    0.421281    0.486341    11.00000    0.04779    0.04890 =
         0.13088   -0.00944   -0.00933   -0.00660
AFIX 137
H76A  2    1.325643    0.411513    0.506123    11.00000   -1.50000
H76B  2    1.233997    0.446014    0.522101    11.00000   -1.50000
H76C  2    1.272142    0.446302    0.441545    11.00000   -1.50000
AFIX   0
C37   1    0.941982    0.771503   -0.275609    11.00000    0.06943    0.05315 =
         0.04840    0.01354    0.00986   -0.01270
AFIX  23
H37A  2    0.901224    0.807323   -0.286681    11.00000   -1.20000
H37B  2    0.978957    0.764803   -0.318731    11.00000   -1.20000
AFIX   0
C72   1    1.036986    0.309141    0.705740    11.00000    0.10304    0.03599 =
         0.04996    0.01816   -0.01583   -0.01473
AFIX 137
H72A  2    1.021447    0.277015    0.742151    11.00000   -1.50000
H72B  2    1.063513    0.346328    0.730127    11.00000   -1.50000
H72C  2    1.079151    0.290731    0.671911    11.00000   -1.50000
AFIX   0
C25   1    0.463141    0.690010    0.205595    11.00000    0.10079    0.04797 =
         0.06136    0.01003    0.03033   -0.00655
AFIX 137
H25A  2    0.479404    0.724665    0.239165    11.00000   -1.50000
H25B  2    0.441138    0.653471    0.233283    11.00000   -1.50000
H25C  2    0.417108    0.704990    0.171619    11.00000   -1.50000
AFIX   0
C68   1    0.643400    0.087717    0.608898    11.00000    0.04901    0.06013 =
         0.10722   -0.03076    0.01746   -0.02070
AFIX 137
H68A  2    0.597180    0.118968    0.619157    11.00000   -1.50000
H68B  2    0.674679    0.076504    0.654251    11.00000   -1.50000
H68C  2    0.616797    0.049160    0.587559    11.00000   -1.50000
AFIX   0
C44   1    0.970965    0.586025   -0.100039    11.00000    0.05291    0.06348 =
         0.08581   -0.01707    0.00085   -0.01043
AFIX 137
H44A  2    0.979018    0.614795   -0.141488    11.00000   -1.50000
H44B  2    0.938641    0.547846   -0.116194    11.00000   -1.50000
H44C  2    1.028619    0.573375   -0.080015    11.00000   -1.50000
AFIX   0
C91   1    0.528943    0.322665    0.494313    11.00000    0.06451    0.05483 =
         0.06822   -0.00564    0.00930   -0.01430
AFIX 137
H91A  2    0.566054    0.298935    0.529168    11.00000   -1.50000
H91B  2    0.508223    0.293691    0.455715    11.00000   -1.50000
H91C  2    0.478279    0.340631    0.519428    11.00000   -1.50000
AFIX   0
C78   1    1.268761    0.318472    0.414873    11.00000    0.04954    0.06508 =
         0.09624    0.02403   -0.00207    0.02987
AFIX 137
H78A  2    1.235983    0.279209    0.403590    11.00000   -1.50000
H78B  2    1.326528    0.307393    0.435902    11.00000   -1.50000
H78C  2    1.276572    0.343201    0.370156    11.00000   -1.50000
AFIX   0
C51   1    0.948082   -0.032406    0.798316    11.00000    0.07857    0.05761 =
         0.10711    0.04307    0.01400    0.00651
AFIX 137
H51A  2    0.999724   -0.031220    0.831061    11.00000   -1.50000
H51B  2    0.956599   -0.065138    0.760922    11.00000   -1.50000
H51C  2    0.895651   -0.042726    0.826242    11.00000   -1.50000
AFIX   0
C1    1    0.552220    1.034231    0.296921    11.00000    0.08559    0.05290 =
         0.10337   -0.03938   -0.00958   -0.00659
AFIX 137
H1A   2    0.536161    1.065424    0.259130    11.00000   -1.50000
H1B   2    0.607175    1.047530    0.321268    11.00000   -1.50000
H1C   2    0.505261    1.031888    0.332633    11.00000   -1.50000
AFIX   0
C47   1    0.714676    0.476403    0.176651    11.00000    0.10016    0.07985 =
         0.08905    0.04996    0.00596    0.03110
AFIX 137
H47A  2    0.698173    0.431821    0.167042    11.00000   -1.50000
H47B  2    0.665584    0.498615    0.199504    11.00000   -1.50000
H47C  2    0.766374    0.477564    0.209336    11.00000   -1.50000
AFIX   0
C85   1    0.450412    0.192366    0.333458    11.00000    0.07061    0.06004 =
         0.07580   -0.00603    0.00550    0.00123
AFIX 163
H85   2    0.412351    0.177565    0.370205    11.00000   -1.20000
AFIX   0
C10   1    0.090135    0.829266    0.057667    11.00000    0.05423    0.05667 =
         0.10692   -0.01580    0.00412   -0.01301
AFIX 137
H10A  2    0.055338    0.795578    0.033693    11.00000   -1.50000
H10B  2    0.091576    0.867135    0.026264    11.00000   -1.50000
H10C  2    0.063344    0.840485    0.104039    11.00000   -1.50000
AFIX   0
C21   1    0.830553    0.868892   -0.019126    11.00000    0.08901    0.07188 =
         0.10893   -0.00169    0.01514   -0.02860
AFIX 137
H21A  2    0.861194    0.907191   -0.036107    11.00000   -1.50000
H21B  2    0.784691    0.856831   -0.054754    11.00000   -1.50000
H21C  2    0.872733    0.833687   -0.013443    11.00000   -1.50000
AFIX   0
C45   1    0.972136    0.677890   -0.005550    11.00000    0.07981    0.08161 =
         0.08282   -0.02618   -0.03462   -0.01313
AFIX 137
H45A  2    0.940005    0.697184    0.034638    11.00000   -1.50000
H45B  2    0.982404    0.710286   -0.042992    11.00000   -1.50000
H45C  2    1.028737    0.661376    0.012717    11.00000   -1.50000
AFIX   0
C94   1    0.784445    0.525487    0.677385    11.00000    0.11615    0.05028 =
         0.06335   -0.01236   -0.01629    0.01114
AFIX 137
H94A  2    0.798946    0.570226    0.667054    11.00000   -1.50000
H94B  2    0.834610    0.504890    0.702165    11.00000   -1.50000
H94C  2    0.733000    0.523779    0.708678    11.00000   -1.50000
AFIX   0
C39   1    1.049695    0.806713   -0.162911    11.00000    0.08972    0.08241 =
         0.09805    0.01095    0.01004   -0.02602
AFIX 163
H39   2    1.088337    0.819917   -0.124580    11.00000   -1.20000
AFIX   0
C31   1    0.234138    0.577997   -0.015999    11.00000    0.05869    0.04795 =
         0.11566    0.00081    0.00687   -0.00613
AFIX 137
H31A  2    0.179584    0.587602    0.009407    11.00000   -1.50000
H31B  2    0.271517    0.550363    0.014615    11.00000   -1.50000
H31C  2    0.220063    0.556079   -0.061903    11.00000   -1.50000
AFIX   0
C67   1    0.668007    0.130600    0.482328    11.00000    0.08812    0.07310 =
         0.12707   -0.01906   -0.02629   -0.01568
AFIX 137
H67A  2    0.621052    0.162191    0.488389    11.00000   -1.50000
H67B  2    0.642850    0.090822    0.462824    11.00000   -1.50000
H67C  2    0.711496    0.147306    0.448522    11.00000   -1.50000
AFIX   0
HKLF 4

REM  data_a_a.res in P2(1)
REM R1 =  0.1140 for    6902 Fo > 4sig(Fo)  and  0.4006 for all   27312 data
REM   1253 parameters refined using      1 restraints

END

WGHT      0.0886      0.0000

REM Highest difference peak  0.291,  deepest hole -0.286,  1-sigma level  0.065
Q1    1   0.6858  0.2400  0.1763  11.00000  0.05    0.29
Q2    1   0.6959  0.4558  0.4077  11.00000  0.05    0.28
Q3    1   0.5826  0.4765  0.1827  11.00000  0.05    0.26
Q4    1   0.6288  0.4517  0.6042  11.00000  0.05    0.25
Q5    1   1.3353  0.2682  0.7301  11.00000  0.05    0.25
Q6    1   0.7047  0.9799  0.2484  11.00000  0.05    0.24
Q7    1   0.3185  0.6784  0.1841  11.00000  0.05    0.24
Q8    1   0.5087  1.0394  0.1828  11.00000  0.05    0.24
Q9    1   0.8828  0.3561  0.2822  11.00000  0.05    0.24
Q10   1   0.2619  0.8708  0.1679  11.00000  0.05    0.24
Q11   1   0.8360  0.8274 -0.1831  11.00000  0.05    0.23
Q12   1   0.7153  1.0051  0.1505  11.00000  0.05    0.23
Q13   1   0.6292  0.5306 -0.0068  11.00000  0.05    0.23
Q14   1   0.5218  0.8440  0.0665  11.00000  0.05    0.23
Q15   1   0.3532  0.5079 -0.0236  11.00000  0.05    0.23
Q16   1   0.7929  0.0786  0.2574  11.00000  0.05    0.23
Q17   1   0.8075  0.6271  0.5847  11.00000  0.05    0.22
Q18   1   0.8230  0.5394 -0.1001  11.00000  0.05    0.22
Q19   1   1.0367  0.5522  0.0628  11.00000  0.05    0.22
Q20   1   0.9575  0.5338  0.1041  11.00000  0.05    0.22
;
_shelx_res_checksum   17853

_shelx_hkl_file
;
   1   0   0    3.20    4.10
   1   0   0   -2.60    1.70
   1   0   0   -0.50    3.10
   1   0   0    3.60    3.30
   1   0   0    1.20    3.40
   1   0   0   -2.00    2.00
  -1   0   0   -2.00    0.80
  -1   0   0   -2.50    3.60
  -1   0   0   -0.20    3.50
  -1   0   0   -2.00    1.20
  -1   0   0   -1.30    2.90
  -1   0   0   -3.00    2.10
   2   0   0  605.34   67.29
   2   0   0  611.04   66.39
   2   0   0  715.43   65.79
   2   0   0  661.33   67.89
   2   0   0  682.73   67.19
   2   0   0  647.34   66.99
  -2   0   0  678.83   66.69
  -2   0   0  669.73   67.59
  -2   0   0  576.64   67.09
  -2   0   0  597.44   66.39
  -2   0   0  669.93   65.79
  -2   0   0  573.64   65.59
   3   0   0   -8.20   14.10
   3   0   0  -19.40   13.50
   3   0   0  -18.60   17.10
   3   0   0   -5.20   12.60
   3   0   0   -0.10    8.30
   3   0   0  -22.90   17.90
  -3   0   0    4.50   14.30
  -3   0   0  -19.40   14.60
  -3   0   0  -28.20   15.70
  -3   0   0  -15.10    8.20
  -3   0   0  -25.70   11.60
  -3   0   0   -4.00    8.60
  -3   0   0  -10.60   16.40
   4   0   0 1329.47  121.69
   4   0   0 1209.08  118.79
   4   0   0 1149.58  120.19
   4   0   0 1263.57  121.69
   4   0   0 1132.09  122.19
   4   0   0 1044.30  121.49
  -4   0   0 1180.68  122.19
  -4   0   0 1153.28  119.89
  -4   0   0 1164.28  118.79
  -4   0   0 1107.79  121.39
  -4   0   0 1138.19  120.69
  -4   0   0 1184.28  121.39
  -4   0   0 1062.29  118.59
   5   0   0   11.30   21.30
   5   0   0   -9.90   10.70
   5   0   0   -2.00   15.90
   5   0   0   32.50   18.00
   5   0   0  -28.50   17.90
  -5   0   0   12.30   22.20
  -5   0   0  -47.30   10.30
  -5   0   0  -34.50   13.30
  -5   0   0  -30.80   17.70
  -5   0   0    1.00   16.40
  -5   0   0   -0.20   18.60
   6   0   0  115.89   22.50
   6   0   0   19.00   18.00
   6   0   0   81.19   26.80
   6   0   0   78.99   14.80
   6   0   0  109.69   20.10
  -6   0   0   42.90   18.80
  -6   0   0   12.30   14.00
  -6   0   0   57.59   17.10
  -6   0   0   51.59   22.30
  -6   0   0   85.69   22.60
  -6   0   0   89.89   26.90
   7   0   0  -21.90   25.70
   7   0   0   -7.80   17.90
   7   0   0  -11.90   12.40
   7   0   0    9.60   19.80
  -7   0   0  -34.90   14.30
  -7   0   0    4.20   27.00
   8   0   0   18.80   14.00
   8   0   0   20.30   18.10
   8   0   0   14.10   21.00
   8   0   0   53.99   27.20
  -8   0   0   25.80   17.10
  -8   0   0   15.20   28.60
   9   0   0    5.60   27.90
   9   0   0   -6.20   21.80
   9   0   0   -1.30   18.30
   9   0   0  -16.30   13.90
  -9   0   0   -2.10   17.70
  -9   0   0   16.50   30.90
  10   0   0   91.09   24.10
  10   0   0   49.20   18.10
  10   0   0   69.69   26.80
  10   0   0   47.60   30.60
 -10   0   0   62.59   21.40
 -10   0   0   70.99   34.10
  11   0   0   -0.40   24.70
  11   0   0  -14.30   18.40
  11   0   0  -25.10   16.80
  11   0   0   -4.20   30.80
 -11   0   0  -20.30   34.40
 -11   0   0   17.10   19.60
  12   0   0   44.90   33.70
  12   0   0   -6.30   18.60
  12   0   0  -45.00   25.50
  12   0   0   -7.90   26.00
 -12   0   0  -20.60   35.30
 -12   0   0   13.70   20.60
  13   0   0   33.20   20.70
  13   0   0    1.90   32.70
  13   0   0   -8.60   29.10
 -13   0   0   39.20   41.50
 -13   0   0   25.60   22.20
  14   0   0   27.60   36.70
  14   0   0    7.90   32.60
 -14   0   0   57.79   44.40
 -14   0   0  105.69   25.20
  15   0   0  -18.10   32.90
  15   0   0    0.50   37.10
 -15   0   0  -22.80   46.30
  16   0   0   -4.70   41.80
  16   0   0  -10.50   35.30
 -16   0   0   -2.80   48.90
  17   0   0    8.10   37.80
  17   0   0   57.89   48.00
 -17   0   0  101.99   60.39
  18   0   0   -3.00   39.70
  18   0   0  -63.09   48.90
 -18   0   0   39.90   64.49
  19   0   0  -21.10   46.90
  19   0   0  -42.80   55.89
 -19   0   0  -41.30   75.19
 -19   0   1  -64.69   73.09
  19   0  -1   -9.80   59.99
  19   0  -1   -8.80   46.90
 -18   0   1  -94.29   57.39
  18   0  -1  -20.90   50.69
  18   0  -1  -24.90   39.40
 -17   0   1   54.29   56.89
  17   0  -1   24.90   39.90
  17   0  -1  121.59   49.80
 -16   0   1   51.79   53.59
  16   0  -1  115.39   50.39
  16   0  -1   15.30   36.90
 -15   0   1    7.50   47.00
  15   0  -1  -21.30   41.60
  15   0  -1   -3.30   33.00
 -14   0   1  -13.60   19.70
 -14   0   1   51.69   44.70
  14   0  -1    9.10   35.70
  14   0  -1  -27.70   21.20
  14   0  -1   32.80   32.40
 -13   0   1   62.89   41.40
 -13   0   1    8.70   20.70
  13   0  -1    3.40   21.20
  13   0  -1    9.90   30.20
  13   0  -1   15.30   34.80
 -12   0   1   50.89   38.40
 -12   0   1    9.30   20.00
  12   0  -1   54.19   31.00
  12   0  -1   26.80   21.10
  12   0  -1  -17.60   31.50
 -11   0   1   16.00   19.00
 -11   0   1   12.30   19.20
 -11   0   1   14.70   32.70
  11   0  -1   13.60   19.10
  11   0  -1   68.59   29.20
  11   0  -1   19.30   32.00
 -10   0   1  -13.10   16.20
 -10   0   1    8.10   22.10
 -10   0   1  -17.90   16.30
 -10   0   1    1.10   31.60
  10   0  -1   -8.70   17.00
  10   0  -1   43.60   25.80
  10   0  -1    6.80   29.80
  10   0  -1  -34.30   17.80
  -9   0   1   24.40   21.00
  -9   0   1  -27.30   15.20
  -9   0   1  -17.10   29.30
  -9   0   1  -63.79   15.00
   9   0  -1  -24.80   17.30
   9   0  -1   -0.10   22.40
   9   0  -1  -19.90   25.30
   9   0  -1  -28.30   15.30
  -8   0   1  169.28   33.60
  -8   0   1  269.27   43.50
  -8   0   1  249.18   34.00
  -8   0   1  337.27   38.80
   8   0  -1  257.77   34.00
   8   0  -1  326.27   37.50
   8   0  -1  239.68   38.90
   8   0  -1  350.96   45.10
  -7   0   1  -36.20   14.10
  -7   0   1   58.49   26.50
  -7   0   1  -11.20   15.60
  -7   0   1   50.19   20.40
   7   0  -1   53.29   18.60
   7   0  -1   40.50   25.70
   7   0  -1   37.40   15.40
   7   0  -1    5.60   21.30
  -6   0   1   41.50   21.20
  -6   0   1   74.39   23.30
  -6   0   1    5.00   21.60
  -6   0   1   61.09   22.40
  -6   0   1   -8.40   14.60
  -6   0   1   49.30   18.50
  -6   0   1  -24.20   13.30
   6   0  -1   -6.70   17.90
   6   0  -1    0.20   23.20
   6   0  -1   34.70   14.10
   6   0  -1   22.30   19.90
   6   0  -1   33.50   17.10
  -5   0   1   -4.00   15.70
  -5   0   1   22.20   12.60
  -5   0   1   22.70   19.60
  -5   0   1   15.90   17.60
  -5   0   1    9.30   14.20
  -5   0   1  -39.70   12.40
  -5   0   1  -14.40   13.10
  -5   0   1    6.00   16.30
   5   0  -1   10.50   19.30
   5   0  -1    0.20   18.00
   5   0  -1  -16.80   14.90
   5   0  -1    8.90   12.80
   5   0  -1   39.60   21.70
  -4   0   1  100.19   16.50
  -4   0   1  103.79   17.90
  -4   0   1   41.20   15.00
  -4   0   1   69.69   19.20
  -4   0   1   98.79   23.10
  -4   0   1   99.09   22.60
  -4   0   1  125.99   19.20
   4   0  -1  101.89   25.30
   4   0  -1  129.79   23.30
   4   0  -1   99.99   16.80
   4   0  -1   77.19   20.60
   4   0  -1   72.19   17.90
  -3   0   1 1145.69  110.29
  -3   0   1  970.00  108.99
  -3   0   1 1090.99  110.29
  -3   0   1  909.31  108.89
  -3   0   1 1146.69  108.99
   3   0  -1  931.21  110.59
   3   0  -1 1104.29  110.19
   3   0  -1 1133.39  108.99
   3   0  -1 1099.99  110.59
  -2   0   1   54.79   11.00
  -2   0   1   62.09   10.80
  -2   0   1   69.29   13.90
  -2   0   1   51.09   10.90
  -2   0   1   34.60   11.80
  -2   0   1   53.89   10.70
   2   0  -1   93.29   13.90
   2   0  -1   52.69   10.80
   2   0  -1   63.99   14.30
   2   0  -1   39.20   12.00
   2   0  -1   41.60   10.60
  -1   0   1 9065.99  917.51
  -1   0   1 8953.30  917.21
  -1   0   1 9756.62  917.41
   1   0  -1 9999.00  917.61
   1   0  -1 9039.40  917.31
   1   0  -1 8776.22  917.21
   1   0  -1 8316.87  917.51
   1   0  -1 8767.82  917.61
   0   0   1   -7.10    3.20
   0   0   1   -7.40    1.40
   0   0   1  -11.60    3.00
   0   0  -1   -5.10    2.40
   0   0  -1  -12.10    2.00
   0   0  -1  -15.00    3.40
   1   0   1 8935.51  899.41
   1   0   1 9689.63  899.81
   1   0   1 8275.67  899.71
   1   0   1 8903.21  899.61
  -1   0  -1 8789.92  899.81
  -1   0  -1 8309.47  899.41
  -1   0  -1 8476.85  899.61
  -1   0  -1 9892.41  899.91
   2   0   1   39.40   13.80
   2   0   1   52.49   12.00
   2   0   1    6.40    9.40
   2   0   1   54.49   10.80
   2   0   1   41.80   12.00
  -2   0  -1   34.50   11.90
  -2   0  -1   38.00   11.80
  -2   0  -1   69.19   15.50
  -2   0  -1   85.49   11.80
   3   0   1 1176.68  115.99
   3   0   1 1228.18  113.59
   3   0   1 1080.99  115.69
   3   0   1 1061.69  116.19
   3   0   1 1130.59  117.39
  -3   0  -1  980.30  116.79
  -3   0  -1 1050.09  116.69
  -3   0  -1 1019.10  116.69
  -3   0  -1 1184.38  115.99
  -3   0  -1 1185.48  116.19
   4   0   1  103.29   14.00
   4   0   1   81.99   21.00
   4   0   1   97.19   22.50
   4   0   1  126.39   21.10
   4   0   1  122.19   25.70
   4   0   1  114.09   22.80
  -4   0  -1   98.09   24.10
  -4   0  -1  111.09   23.80
  -4   0  -1  121.69   20.90
  -4   0  -1  111.69   28.40
  -4   0  -1  102.09   21.60
   5   0   1  -17.90   16.20
   5   0   1   11.80   17.60
   5   0   1   12.70   18.70
   5   0   1   18.40   23.10
   5   0   1   18.70   19.00
   5   0   1   24.00    9.10
  -5   0  -1   39.40   16.30
  -5   0  -1   11.00   19.70
  -5   0  -1   28.90   17.50
  -5   0  -1    1.50   24.10
  -5   0  -1   25.30   20.10
   6   0   1   35.40   22.60
   6   0   1   -5.40   24.20
   6   0   1   44.00   20.50
   6   0   1   -3.50    9.60
   6   0   1   -6.80   18.10
   6   0   1   19.80   19.20
  -6   0  -1   40.90   17.00
  -6   0  -1  -20.10   20.70
  -6   0  -1  -21.80   19.70
  -6   0  -1    3.20   16.00
  -6   0  -1   32.70   27.70
   7   0   1   41.30   25.60
   7   0   1    8.50   17.90
   7   0   1   22.70   11.70
   7   0   1   34.10   21.00
  -7   0  -1   70.09   19.80
  -7   0  -1   15.20   25.20
  -7   0  -1   76.59   29.00
   8   0   1  300.07   43.40
   8   0   1  285.37   36.50
   8   0   1  374.86   43.00
   8   0   1  414.06   49.00
  -8   0  -1  279.27   49.70
  -8   0  -1  313.57   41.70
   9   0   1  -23.30   25.80
   9   0   1   18.20   13.00
   9   0   1   -3.40   22.30
   9   0   1    6.80   19.10
  -9   0  -1   60.39   20.80
  -9   0  -1   10.00   31.70
  10   0   1   -8.60   21.90
  10   0   1   -9.40   18.50
  10   0   1  -12.80   27.10
  10   0   1  -12.30   13.60
 -10   0  -1   15.90   35.20
 -10   0  -1   21.10   20.40
  11   0   1   37.70   16.30
  11   0   1    8.30   31.20
  11   0   1   48.40   26.70
 -11   0  -1   44.10   22.70
 -11   0  -1    2.10   35.70
  12   0   1    8.80   16.30
  12   0   1  -57.79   30.00
  12   0   1   -3.80   27.00
 -12   0  -1   10.30   39.20
 -12   0  -1   43.90   24.70
  13   0   1  -37.10   34.90
  13   0   1   -5.10   27.70
 -13   0  -1   37.80   23.80
 -13   0  -1   21.00   41.00
  14   0   1   53.59   32.60
  14   0   1   -1.90   37.40
 -14   0  -1  -17.50   22.20
 -14   0  -1  -16.40   45.50
  15   0   1   14.70   37.40
  15   0   1    5.10   32.00
 -15   0  -1   23.50   48.00
  16   0   1   -1.60   40.70
  16   0   1  -33.20   34.90
 -16   0  -1  -60.19   49.70
  17   0   1    6.30   45.40
  17   0   1    1.80   36.20
 -17   0  -1  -32.60   51.19
  18   0   1  -34.70   37.10
  18   0   1   48.60   51.99
 -18   0  -1  116.59   70.99
  19   0   1  -74.39   39.40
  19   0   1  -31.20   59.39
 -19   0  -1  -10.20   71.89
 -19   0   2  -17.60   72.19
  19   0  -2 -129.09   54.09
  19   0  -2   32.80   50.29
 -18   0   2 -112.59   54.89
  18   0  -2   15.90   43.50
  18   0  -2   25.10   52.19
 -17   0   2   25.40   51.69
  17   0  -2    1.10   49.20
  17   0  -2  -19.50   37.90
 -16   0   2  -42.10   48.70
  16   0  -2   30.80   37.40
  16   0  -2   10.60   45.40
 -15   0   2    3.90   43.40
  15   0  -2   54.19   37.20
  15   0  -2   44.20   43.40
 -14   0   2   57.49   42.60
 -14   0   2   31.40   33.20
  14   0  -2  -20.80   31.80
  14   0  -2   80.09   42.50
  14   0  -2   17.00   24.80
 -13   0   2   22.30   19.50
 -13   0   2  -43.70   36.10
  13   0  -2   33.60   24.30
  13   0  -2    7.50   31.30
  13   0  -2   60.59   38.90
 -12   0   2  -14.40   34.40
 -12   0   2  -26.30   20.70
 -12   0   2  -17.40   17.10
  12   0  -2   -6.90   35.30
  12   0  -2    2.30   22.00
  12   0  -2  -37.50   27.20
 -11   0   2  -16.20   16.50
 -11   0   2    7.20   32.90
 -11   0   2  -25.20   19.50
  11   0  -2   28.80   27.50
  11   0  -2  -17.40   20.20
  11   0  -2    6.40   31.10
 -10   0   2   10.50   31.10
 -10   0   2   99.59   24.40
 -10   0   2   23.80   17.70
 -10   0   2   53.09   21.80
  10   0  -2   -0.60   19.50
  10   0  -2   34.60   29.80
  10   0  -2   59.99   27.00
  -9   0   2   28.70   21.00
  -9   0   2    0.40   15.90
  -9   0   2  -47.60   17.30
  -9   0   2    2.70   27.70
   9   0  -2    5.00   17.10
   9   0  -2   52.99   24.80
   9   0  -2   32.10   27.20
  -8   0   2   15.00   18.40
  -8   0   2   84.29   21.30
  -8   0   2   60.09   28.10
  -8   0   2   20.60   17.00
   8   0  -2   66.49   19.60
   8   0  -2   61.19   27.50
   8   0  -2   51.09   24.50
  -7   0   2   58.79   20.80
  -7   0   2  133.79   28.90
  -7   0   2  123.69   23.40
  -7   0   2   83.19   19.70
   7   0  -2  113.69   21.40
   7   0  -2   94.49   26.80
   7   0  -2  165.98   32.20
  -6   0   2  303.77   35.00
  -6   0   2  281.77   41.10
  -6   0   2  308.27   40.70
  -6   0   2  254.57   35.20
  -6   0   2  263.87   35.10
  -6   0   2  279.37   36.30
   6   0  -2  286.07   42.20
   6   0  -2  264.17   35.50
   6   0  -2  305.67   39.80
  -5   0   2   26.60   18.50
  -5   0   2  114.09   18.10
  -5   0   2  101.99   21.90
  -5   0   2  136.29   20.50
  -5   0   2   93.09   19.20
  -5   0   2   93.09   23.20
   5   0  -2  139.09   27.50
   5   0  -2   95.99   19.30
   5   0  -2   95.49   22.80
   5   0  -2   93.39   23.70
  -4   0   2   95.49   19.70
  -4   0   2  143.09   19.60
  -4   0   2  104.39   20.30
  -4   0   2  148.19   24.80
  -4   0   2   93.49   21.00
  -4   0   2   52.59   18.00
   4   0  -2   90.49   25.40
   4   0  -2  129.19   22.50
   4   0  -2   96.69   19.30
   4   0  -2  139.49   23.80
   4   0  -2   77.39   19.40
  -3   0   2  460.95   52.39
  -3   0   2  453.45   52.59
  -3   0   2  504.15   51.49
  -3   0   2  485.55   51.29
   3   0  -2  423.46   54.49
   3   0  -2  459.75   53.99
   3   0  -2  457.45   51.39
   3   0  -2  451.25   52.39
   3   0  -2  483.85   51.79
  -2   0   2  826.12   86.39
  -2   0   2  897.41   85.99
  -2   0   2  787.42   85.89
   2   0  -2  850.01   87.29
   2   0  -2  767.82   87.19
   2   0  -2  849.22   86.49
   2   0  -2  808.22   85.89
   2   0  -2  858.11   86.19
  -1   0   2  878.41   86.29
   1   0  -2  812.62   86.29
   1   0  -2  839.42   86.49
   1   0  -2  813.02   86.79
   0   0   2 5131.09  523.05
   0   0   2 5373.66  522.95
   0   0   2 5342.47  522.45
   0   0   2 4854.81  522.85
   0   0  -2 5391.96  523.15
   0   0  -2 5374.56  523.05
   0   0  -2 4915.61  522.95
   0   0  -2 4997.10  522.35
   1   0   2  850.61   83.69
   1   0   2  781.62   83.49
   1   0   2  746.93   82.79
   1   0   2  857.81   82.79
  -1   0  -2  848.22   82.79
  -1   0  -2  759.12   82.99
  -1   0  -2  811.22   83.79
  -1   0  -2  749.62   83.49
  -1   0  -2  877.51   84.19
   2   0   2  795.02   81.39
   2   0   2  850.41   82.79
   2   0   2  912.81   82.79
   2   0   2  806.32   82.19
  -2   0  -2  731.03   81.29
  -2   0  -2  739.03   82.99
  -2   0  -2  734.53   82.19
  -2   0  -2  784.42   79.89
  -2   0  -2  726.73   82.39
   3   0   2  383.26   52.19
   3   0   2  522.05   52.69
   3   0   2  497.25   51.79
   3   0   2  430.36   52.79
  -3   0  -2  434.66   53.89
  -3   0  -2  493.75   55.39
  -3   0  -2  462.45   51.49
  -3   0  -2  480.25   53.49
   4   0   2   -2.30   17.40
   4   0   2   95.59   18.30
   4   0   2   26.10   19.90
   4   0   2   52.39   22.50
   4   0   2   65.69   19.10
  -4   0  -2   80.99   25.70
  -4   0  -2   18.80   19.80
  -4   0  -2   77.99   20.10
  -4   0  -2   54.49   18.80
   5   0   2   46.70   24.20
   5   0   2   73.99   21.10
   5   0   2  133.29   23.30
   5   0   2  106.49   21.00
  -5   0  -2  102.69   22.20
  -5   0  -2   47.00   22.20
  -5   0  -2  112.09   30.30
  -5   0  -2   96.09   20.20
   6   0   2  279.27   36.50
   6   0   2  204.08   37.90
   6   0   2  245.58   34.30
   6   0   2  243.88   33.20
  -6   0  -2  261.57   42.70
  -6   0  -2  215.38   33.80
  -6   0  -2  231.18   35.80
   7   0   2  135.79   28.80
   7   0   2  104.19   26.30
   7   0   2  109.19   16.40
   7   0   2  181.38   26.20
   7   0   2  113.79   32.10
  -7   0  -2  140.09   31.10
  -7   0  -2  128.19   35.60
  -7   0  -2  164.78   26.80
   8   0   2   56.59   28.70
   8   0   2   18.20   19.30
   8   0   2   43.10   11.00
   8   0   2   42.80   22.70
  -8   0  -2   75.39   33.80
  -8   0  -2   56.39   21.60
   9   0   2   -0.40   26.20
   9   0   2    2.50    9.90
   9   0   2  -32.10   16.60
   9   0   2   44.20   23.20
  -9   0  -2   23.70   20.90
  -9   0  -2    7.50   33.30
  10   0   2   57.69   30.00
  10   0   2  102.29   27.60
 -10   0  -2   67.39   24.40
 -10   0  -2   43.40   36.20
  11   0   2   84.69   33.30
  11   0   2   10.60   24.70
 -11   0  -2   69.59   25.20
 -11   0  -2  -33.60   30.60
  12   0   2   17.00   33.60
  12   0   2    9.90   26.00
 -12   0  -2  -21.70   38.80
 -12   0  -2   -4.20   22.80
  13   0   2    0.70   27.90
  13   0   2  -15.50   32.60
 -13   0  -2   -8.70   23.00
 -13   0  -2   19.00   43.80
  14   0   2   15.90   36.50
  14   0   2  -11.70   29.60
 -14   0  -2   18.40   25.60
 -14   0  -2   54.09   46.30
  15   0   2   44.70   40.20
  15   0   2  -31.60   31.00
 -15   0  -2  -62.09   45.10
 -15   0  -2   25.30   28.00
  16   0   2  -32.00   32.30
  16   0   2  -35.40   39.20
 -16   0  -2   -5.40   49.90
  17   0   2   -4.30   35.60
  17   0   2   21.90   43.70
 -17   0  -2  -27.30   55.69
  18   0   2   -9.10   39.10
  18   0   2  -38.50   51.79
 -18   0  -2   70.89   69.59
  19   0   2    2.80   59.59
  19   0   2   57.09   46.60
 -19   0  -2   53.39   76.39
 -19   0   3   80.69   77.09
  19   0  -3    9.80   50.29
  19   0  -3  -91.89   69.09
 -18   0   3   25.20   57.79
  18   0  -3   -7.90   47.60
  18   0  -3   71.39   64.29
 -17   0   3  -10.30   49.99
  17   0  -3   32.60   43.30
  17   0  -3    2.10   48.80
 -16   0   3  -42.30   47.80
  16   0  -3  -10.80   44.70
  16   0  -3   21.70   38.60
 -15   0   3  -22.40   41.50
  15   0  -3    4.60   44.70
  15   0  -3   94.09   40.30
  15   0  -3   14.00   28.80
 -14   0   3   44.80   42.10
  14   0  -3   33.00   38.70
  14   0  -3  -26.20   32.80
  14   0  -3  -59.49   24.70
 -13   0   3   37.00   38.90
 -13   0   3    4.50   17.80
  13   0  -3  -45.70   30.60
  13   0  -3   37.00   36.30
  13   0  -3  -17.40   23.90
 -12   0   3   -5.40   26.00
 -12   0   3  -17.80   17.10
 -12   0   3  100.49   37.50
  12   0  -3   51.29   37.70
  12   0  -3   32.30   31.60
  12   0  -3   19.30   23.90
 -11   0   3  -26.20   16.10
 -11   0   3  -29.40   21.20
 -11   0   3    8.10   31.60
  11   0  -3   25.30   21.80
  11   0  -3   -6.60   31.50
  11   0  -3  -15.10   26.80
 -10   0   3    7.20   16.30
 -10   0   3   44.40   29.50
 -10   0   3  -46.00   19.20
 -10   0   3   27.00   20.70
  10   0  -3   54.29   30.80
  10   0  -3  -19.70   19.00
  10   0  -3   68.29   29.00
  -9   0   3   -2.30   19.20
  -9   0   3   14.10   27.30
  -9   0   3    1.20   19.70
  -9   0   3   -8.30   15.40
   9   0  -3  -13.90   23.80
   9   0  -3   28.20   27.50
   9   0  -3   22.40   19.00
  -8   0   3  130.89   24.30
  -8   0   3   90.99   21.30
  -8   0   3  110.59   31.20
  -8   0   3   80.09   23.50
   8   0  -3  171.68   30.80
   8   0  -3  125.39   24.60
   8   0  -3  188.78   35.60
  -7   0   3  251.97   46.20
  -7   0   3  315.07   41.20
  -7   0   3  357.96   41.50
  -7   0   3  320.67   42.00
  -7   0   3  346.57   43.00
   7   0  -3  382.26   50.29
   7   0  -3  377.26   43.80
   7   0  -3  372.86   47.10
   7   0  -3  353.46   47.20
  -6   0   3   25.00   16.20
  -6   0   3  -10.90   21.20
  -6   0   3   30.80   16.70
  -6   0   3   19.60   16.90
   6   0  -3   12.80   21.50
   6   0  -3   40.90   17.90
   6   0  -3   17.40   25.00
   6   0  -3   -8.50   20.10
  -5   0   3  381.96   43.60
  -5   0   3  372.76   43.50
  -5   0   3  375.86   45.80
  -5   0   3  338.17   45.10
  -5   0   3  343.37   44.80
  -5   0   3  393.66   43.20
   5   0  -3  340.97   44.30
   5   0  -3  388.26   47.50
   5   0  -3  381.26   49.40
   5   0  -3  346.77   44.40
   5   0  -3  386.56   44.60
  -4   0   3   85.09   19.10
  -4   0   3   52.79   19.90
  -4   0   3   70.19   18.10
  -4   0   3   54.19   15.60
   4   0  -3   64.19   17.60
   4   0  -3   75.59   21.00
   4   0  -3   40.00   17.70
   4   0  -3   90.59   20.10
   4   0  -3   51.19   23.50
  -3   0   3  855.31   87.09
  -3   0   3  810.02   87.39
  -3   0   3  872.81   88.19
   3   0  -3  835.42   87.69
   3   0  -3  788.72   87.59
   3   0  -3  820.72   87.49
   3   0  -3  779.92   89.69
   3   0  -3  903.51   90.29
  -2   0   3 1110.79  106.59
  -2   0   3 1062.29  106.69
  -2   0   3 1027.60  105.49
  -2   0   3  851.61  106.39
   2   0  -3 1075.39  107.49
   2   0  -3 1032.50  106.69
   2   0  -3 1054.59  108.19
  -1   0   3 1123.79  115.69
  -1   0   3 1119.49  115.49
   1   0  -3 1132.19  115.79
   1   0  -3 1131.59  116.29
   1   0  -3 1101.49  115.89
   0   0   3    2.90    8.40
   0   0   3   -1.60   11.80
   0   0   3    0.60   12.30
   0   0   3   -4.40    9.50
   0   0  -3    9.00   10.70
   0   0  -3  -11.90   12.60
   0   0  -3   -8.10    8.60
   0   0  -3  -10.10   12.50
   1   0   3 1231.08  114.69
   1   0   3 1068.09  115.39
   1   0   3 1210.48  115.19
  -1   0  -3 1040.80  116.19
  -1   0  -3 1031.30  115.19
  -1   0  -3 1136.59  114.79
  -1   0  -3 1087.49  115.59
   2   0   3 1083.79  112.99
   2   0   3 1225.68  112.29
   2   0   3 1067.89  113.99
   2   0   3 1188.98  114.79
   2   0   3 1078.69  114.59
  -2   0  -3 1057.49  114.89
  -2   0  -3  984.10  113.09
  -2   0  -3 1027.40  114.39
  -2   0  -3 1161.58  115.29
  -2   0  -3 1086.09  112.19
   3   0   3  863.41   84.39
   3   0   3  927.71   84.49
   3   0   3  807.32   81.99
   3   0   3  701.13   83.19
  -3   0  -3  830.42   84.39
  -3   0  -3  694.73   83.99
  -3   0  -3  755.62   85.09
  -3   0  -3  779.92   82.79
  -3   0  -3  724.83   79.59
   4   0   3   67.69   19.30
   4   0   3   80.09   19.70
   4   0   3  124.69   24.90
   4   0   3   45.90   17.10
  -4   0  -3   84.09   26.90
  -4   0  -3   19.10   19.80
  -4   0  -3   45.40   18.40
  -4   0  -3   79.09   21.90
   5   0   3  402.16   48.50
   5   0   3  401.66   49.60
   5   0   3  332.47   44.60
   5   0   3  367.66   44.20
   5   0   3  361.56   45.50
  -5   0  -3  327.77   46.20
  -5   0  -3  355.16   51.49
  -5   0  -3  340.77   46.20
  -5   0  -3  392.16   44.10
   6   0   3   14.20   23.10
   6   0   3   47.00   19.40
   6   0   3   45.60   20.90
   6   0   3   26.20   18.30
  -6   0  -3   29.00   22.00
  -6   0  -3   48.00   23.80
  -6   0  -3  -30.40   16.20
  -6   0  -3   55.29   29.30
   7   0   3  360.46   47.80
   7   0   3  345.27   47.40
   7   0   3  417.56   52.39
  -7   0  -3  385.36   49.60
  -7   0  -3  561.54   66.99
  -7   0  -3  284.97   54.59
   8   0   3  104.89   27.50
   8   0   3   95.29   30.50
   8   0   3  152.98   29.90
   8   0   3  101.29   25.40
  -8   0  -3  148.99   40.20
  -8   0  -3  159.38   29.70
   9   0   3    8.40   28.10
   9   0   3   13.60   25.80
  -9   0  -3   21.20   33.30
  -9   0  -3   28.60   23.40
  10   0   3   26.10   24.50
  10   0   3   55.79   31.40
 -10   0  -3   34.00   24.40
 -10   0  -3  -13.20   34.80
  11   0   3  -26.90   23.30
  11   0   3   -6.20   29.10
 -11   0  -3  -36.00   32.60
 -11   0  -3    2.50   24.30
  12   0   3   78.99   37.00
  12   0   3   13.40   27.20
 -12   0  -3   87.39   29.30
 -12   0  -3  110.49   45.10
  13   0   3   36.40   34.70
  13   0   3  -19.00   26.60
 -13   0  -3  -20.60   43.30
 -13   0  -3   20.90   26.80
  14   0   3   40.60   40.10
  14   0   3   -0.20   29.20
 -14   0  -3   10.90   46.80
 -14   0  -3   37.20   28.50
  15   0   3   53.49   40.20
  15   0   3   46.20   33.20
 -15   0  -3   -8.00   49.30
 -15   0  -3   40.50   28.30
  16   0   3    8.80   42.10
  16   0   3   -5.10   31.60
 -16   0  -3 -112.19   51.49
  17   0   3   36.00   36.60
  17   0   3   58.69   47.00
 -17   0  -3  125.69   66.79
  18   0   3  -31.10   51.59
  18   0   3   36.30   39.00
 -18   0  -3  -32.40   66.79
  19   0   3   -5.30   43.30
  19   0   3   59.09   61.79
 -19   0  -3  -26.20   81.39
 -19   0   4   91.69   69.39
  19   0  -4  103.59   57.49
  19   0  -4   -3.50   70.79
 -18   0   4  -26.60   58.99
  18   0  -4  -23.40   60.59
  18   0  -4  -35.30   46.20
 -17   0   4   49.00   53.79
  17   0  -4 -104.49   35.70
  17   0  -4   17.40   51.39
 -16   0   4   35.00   46.10
  16   0  -4   -6.10   38.00
  16   0  -4   61.69   49.30
 -15   0   4   13.80   40.90
  15   0  -4  -24.90   28.10
  15   0  -4   57.69   37.00
  15   0  -4   24.20   43.60
 -14   0   4   -0.90   38.70
  14   0  -4   54.49   35.80
  14   0  -4  -26.90   37.10
  14   0  -4   -3.50   28.30
 -13   0   4   73.49   40.00
 -13   0   4  -32.60   16.20
  13   0  -4   45.60   27.70
  13   0  -4   41.60   38.70
  13   0  -4  -17.00   31.50
 -12   0   4   27.10   32.20
 -12   0   4    3.60   16.70
  12   0  -4   15.50   24.90
  12   0  -4  -41.10   28.20
  12   0  -4   35.20   38.00
 -11   0   4   18.90   17.10
 -11   0   4   14.10   30.20
  11   0  -4   48.60   24.30
  11   0  -4    7.40   33.90
  11   0  -4   23.70   30.40
 -10   0   4   58.29   31.40
 -10   0   4   96.29   24.10
 -10   0   4   82.89   19.20
  10   0  -4   39.90   23.70
  10   0  -4  140.69   38.20
  10   0  -4   92.69   31.60
  -9   0   4   -6.70   22.00
  -9   0   4    1.90   16.30
  -9   0   4  -69.19   24.30
  -9   0   4   37.10   19.70
   9   0  -4   16.90   25.20
   9   0  -4  -32.80   26.90
   9   0  -4  -26.80   19.20
  -8   0   4   37.40   21.50
  -8   0   4  -13.70   24.80
  -8   0   4   57.99   20.00
  -8   0   4   57.69   18.50
   8   0  -4   36.80   25.00
   8   0  -4   31.40   20.80
   8   0  -4   10.80   28.10
  -7   0   4   47.70   21.00
  -7   0   4   41.70   24.20
  -7   0   4   81.39   19.80
  -7   0   4   56.59   19.90
   7   0  -4   10.00   19.70
   7   0  -4  105.29   30.70
   7   0  -4   54.09   24.60
   7   0  -4   26.10   21.30
  -6   0   4  303.47   42.60
  -6   0   4  312.27   38.80
  -6   0   4  289.97   39.80
  -6   0   4  269.37   38.40
   6   0  -4  248.08   39.80
   6   0  -4  311.27   43.30
   6   0  -4  323.27   40.00
   6   0  -4  377.26   43.40
   6   0  -4  423.76   49.30
  -5   0   4  718.33   70.99
  -5   0   4  601.94   72.19
  -5   0   4  617.94   72.09
  -5   0   4  612.64   72.29
  -5   0   4  680.33   71.99
   5   0  -4  653.93   75.39
   5   0  -4  658.13   72.09
   5   0  -4  679.03   72.29
   5   0  -4  674.23   72.69
   5   0  -4  604.64   75.49
  -4   0   4  354.46   44.30
  -4   0   4  395.66   45.90
  -4   0   4  342.27   44.80
   4   0  -4  407.16   45.60
   4   0  -4  347.17   46.20
   4   0  -4  513.35   51.69
   4   0  -4  398.76   45.70
   4   0  -4  392.96   48.10
  -3   0   4 1364.06  139.99
  -3   0   4 1399.66  140.49
  -3   0   4 1330.27  138.99
   3   0  -4 1300.97  140.29
   3   0  -4 1353.06  141.19
   3   0  -4 1398.56  142.29
  -2   0   4 1616.74  168.68
  -2   0   4 1756.92  170.48
  -2   0   4 1682.13  170.88
  -2   0   4 1712.23  171.08
   2   0  -4 1669.23  171.78
   2   0  -4 1620.04  171.28
   2   0  -4 1571.14  170.48
  -1   0   4 2792.92  267.77
  -1   0   4 2704.13  267.57
  -1   0   4 2341.27  265.57
  -1   0   4 2805.12  267.97
   1   0  -4 2579.84  267.87
   1   0  -4 2660.33  267.77
   1   0  -4 2576.54  267.97
   1   0  -4 2619.54  267.97
   0   0   4   11.60   13.80
   0   0   4    2.30   13.90
   0   0   4    7.70   11.30
   0   0   4   -0.20   17.10
   0   0   4   16.30   16.60
   0   0  -4   11.00   12.70
   0   0  -4   31.10   19.30
   0   0  -4    7.40   14.40
   0   0  -4    3.90   18.10
   1   0   4 2607.54  281.47
   1   0   4 2597.04  282.27
   1   0   4 3061.59  281.77
  -1   0  -4 2667.83  281.77
  -1   0  -4 2778.52  282.57
  -1   0  -4 2945.51  282.07
  -1   0  -4 2732.73  283.17
   2   0   4 1676.33  159.58
   2   0   4 1417.66  158.78
   2   0   4 1485.65  157.48
   2   0   4 1552.64  157.38
   2   0   4 1432.56  158.68
  -2   0  -4 1702.13  159.78
  -2   0  -4 1490.95  159.48
  -2   0  -4 1497.95  160.18
  -2   0  -4 1624.84  157.78
   3   0   4 1303.87  131.49
   3   0   4 1341.27  133.19
   3   0   4 1350.96  133.39
   3   0   4 1382.26  133.29
  -3   0  -4 1263.27  131.89
  -3   0  -4 1100.89  133.69
  -3   0  -4 1280.87  133.49
  -3   0  -4 1220.98  130.39
  -3   0  -4 1257.47  134.09
   4   0   4  365.66   42.00
   4   0   4  324.77   40.50
   4   0   4  318.87   38.70
   4   0   4  401.26   44.90
  -4   0  -4  274.57   34.40
  -4   0  -4  351.86   42.40
  -4   0  -4  348.47   43.90
  -4   0  -4  349.07   40.70
  -4   0  -4  300.47   45.50
   5   0   4  604.34   66.59
   5   0   4  522.25   64.29
   5   0   4  577.44   63.29
   5   0   4  625.94   64.99
  -5   0  -4  588.94   66.79
  -5   0  -4  462.55   65.39
  -5   0  -4  634.54   63.79
  -5   0  -4  521.95   66.69
   6   0   4  231.68   34.90
   6   0   4  260.97   36.80
   6   0   4  332.57   41.70
  -6   0  -4  357.56   40.90
  -6   0  -4  194.48   35.40
  -6   0  -4  195.98   41.30
  -6   0  -4  293.47   40.90
   7   0   4   51.39   24.50
   7   0   4   28.30   21.40
   7   0   4   -1.00   19.60
   7   0   4   62.29   25.40
  -7   0  -4   70.89   34.00
  -7   0  -4   34.80   23.60
   8   0   4   61.59   27.00
   8   0   4   24.00   22.10
   8   0   4    7.00   21.00
  -8   0  -4    0.40   22.90
  -8   0  -4   74.89   34.00
   9   0   4  -19.90   24.30
   9   0   4   49.00   27.80
   9   0   4   70.89   25.20
  -9   0  -4   65.69   26.20
  -9   0  -4   26.30   31.10
  10   0   4   75.89   30.60
  10   0   4   82.69   30.60
 -10   0  -4   71.29   35.40
 -10   0  -4  110.49   30.40
  11   0   4   17.30   30.00
  11   0   4   29.30   25.60
 -11   0  -4   -5.70   34.00
 -11   0  -4   11.60   26.10
  12   0   4   50.19   34.50
  12   0   4  -39.10   25.50
 -12   0  -4   -9.90   26.30
 -12   0  -4  -23.20   38.50
  13   0   4   60.49   31.50
  13   0   4   65.09   38.30
 -13   0  -4  -11.30   27.00
 -13   0  -4   37.00   45.40
  14   0   4   19.90   29.00
  14   0   4    2.80   37.30
 -14   0  -4   -2.10   28.80
 -14   0  -4  -84.19   45.60
  15   0   4   30.80   31.80
  15   0   4  -13.90   40.20
 -15   0  -4   20.70   51.79
 -15   0  -4   56.69   32.90
  16   0   4  -40.60   31.10
  16   0   4   -4.50   42.50
 -16   0  -4   52.89   56.09
  17   0   4   48.90   36.60
  17   0   4  -36.30   42.70
 -17   0  -4  -51.69   58.39
  18   0   4   11.60   49.20
  18   0   4   -2.60   39.60
 -18   0  -4  -17.90   72.79
  19   0   4  -39.70   42.40
  19   0   4  -87.99   54.19
 -19   0  -4  -40.10   81.89
 -19   0   5  -88.69   65.89
  19   0  -5   27.20   67.99
  19   0  -5  -38.30   56.49
 -18   0   5   56.39   60.89
  18   0  -5  -44.20   48.00
  18   0  -5  -19.80   58.59
 -17   0   5   26.50   47.30
  17   0  -5  -70.79   39.20
  17   0  -5  -10.40   50.89
 -16   0   5   77.59   45.50
  16   0  -5   -1.70   40.00
  16   0  -5   32.40   49.10
 -15   0   5   25.60   42.50
  15   0  -5   22.50   39.50
  15   0  -5   82.59   46.40
  15   0  -5  -14.90   32.00
 -14   0   5   70.59   40.40
  14   0  -5   44.60   46.70
  14   0  -5   40.90   31.30
  14   0  -5  -21.70   34.60
 -13   0   5   35.90   35.00
  13   0  -5    5.80   28.60
  13   0  -5    8.40   40.10
  13   0  -5   56.89   35.60
 -12   0   5  -28.80   30.20
 -12   0   5   -5.60   16.60
  12   0  -5   47.60   27.80
  12   0  -5   -5.40   30.00
  12   0  -5   89.79   40.90
 -11   0   5   31.30   17.20
 -11   0   5    1.00   31.80
  11   0  -5   21.90   25.70
  11   0  -5   77.99   39.40
  11   0  -5   46.90   31.80
 -10   0   5  132.09   25.40
 -10   0   5  151.78   38.10
 -10   0   5  197.08   30.00
  10   0  -5  148.29   35.60
  10   0  -5  161.68   32.40
  10   0  -5  120.09   40.50
  -9   0   5    1.00   18.30
  -9   0   5  -67.49   25.00
  -9   0   5  -14.80   16.60
   9   0  -5    5.40   25.90
   9   0  -5    1.30   21.30
   9   0  -5  -26.10   28.90
  -8   0   5    8.70   25.00
  -8   0   5   -4.40   18.10
  -8   0   5  -15.20   16.70
   8   0  -5   11.10   24.50
   8   0  -5   16.80   30.30
   8   0  -5  -10.60   20.30
  -7   0   5   18.10   21.20
  -7   0   5  -29.20   17.30
  -7   0   5    6.90   16.60
   7   0  -5   35.10   23.50
   7   0  -5   -3.00   20.30
   7   0  -5   -7.70   17.40
   7   0  -5    0.70   27.70
   7   0  -5   25.50   20.00
  -6   0   5  570.14   63.19
  -6   0   5  547.15   64.49
   6   0  -5  483.65   64.39
   6   0  -5  565.34   64.69
   6   0  -5  561.04   70.19
   6   0  -5  639.84   65.69
   6   0  -5  581.94   68.19
  -5   0   5  105.99   23.30
  -5   0   5  117.19   20.80
  -5   0   5   96.69   22.40
   5   0  -5   98.19   26.80
   5   0  -5   65.59   22.10
   5   0  -5   79.09   21.90
   5   0  -5  103.09   28.80
  -4   0   5 1355.16  143.09
  -4   0   5 1378.96  141.49
  -4   0   5 1379.16  142.29
   4   0  -5 1343.37  142.79
   4   0  -5 1315.67  143.79
   4   0  -5 1478.55  145.59
  -3   0   5  199.48   31.80
  -3   0   5  226.98   29.60
  -3   0   5  245.48   33.90
  -3   0   5  287.97   32.40
   3   0  -5  259.07   33.00
   3   0  -5  286.07   35.40
   3   0  -5  252.47   35.60
  -2   0   5  507.85   56.69
  -2   0   5  537.95   57.19
   2   0  -5  488.95   58.39
   2   0  -5  480.75   59.49
   2   0  -5  505.55   57.99
  -1   0   5  156.38   20.90
  -1   0   5  157.18   27.50
  -1   0   5  210.28   26.50
  -1   0   5  209.58   27.50
  -1   0   5  190.48   26.00
   1   0  -5  146.89   27.20
   1   0  -5  141.09   27.10
   1   0  -5  222.78   29.80
   0   0   5    9.40   19.00
   0   0   5   34.40   13.40
   0   0   5   27.10   16.60
   0   0   5    4.10   16.50
   0   0   5   40.90   18.50
   0   0  -5    2.40   20.10
   0   0  -5    4.00   22.50
   0   0  -5   35.10   17.50
   0   0  -5   41.80   15.30
   1   0   5  176.78   25.80
   1   0   5  209.78   30.70
   1   0   5  178.78   27.20
   1   0   5  204.48   28.90
  -1   0  -5  176.78   28.40
  -1   0  -5  163.08   26.50
  -1   0  -5  204.78   29.70
  -1   0  -5  199.08   32.30
   2   0   5  502.25   54.69
   2   0   5  516.55   52.09
   2   0   5  460.45   52.19
   2   0   5  450.65   54.99
  -2   0  -5  456.35   52.59
  -2   0  -5  499.15   56.29
  -2   0  -5  427.96   57.59
  -2   0  -5  504.85   56.19
   3   0   5  297.67   39.20
   3   0   5  310.77   34.20
   3   0   5  302.97   40.00
   3   0   5  293.27   38.30
   3   0   5  298.07   36.30
  -3   0  -5  324.67   41.60
  -3   0  -5  242.88   34.60
  -3   0  -5  348.17   38.40
  -3   0  -5  301.57   38.90
  -3   0  -5  321.47   42.80
   4   0   5 1348.57  129.09
   4   0   5 1312.17  130.59
   4   0   5 1135.69  130.99
  -4   0  -5 1303.27  131.59
  -4   0  -5 1213.78  132.39
  -4   0  -5 1291.77  129.89
  -4   0  -5 1160.18  127.39
  -4   0  -5 1214.98  132.09
   5   0   5   13.50   20.20
   5   0   5  104.99   23.40
   5   0   5  105.79   20.10
  -5   0  -5  119.49   25.60
  -5   0  -5   68.89   12.60
  -5   0  -5   88.59   27.40
  -5   0  -5  126.09   31.50
  -5   0  -5   93.29   21.00
   6   0   5  583.84   58.49
   6   0   5  494.05   59.29
  -6   0  -5  378.36   63.49
  -6   0  -5  520.35   61.49
  -6   0  -5  508.45   63.49
  -6   0  -5  497.85   58.69
   7   0   5  -49.20   19.50
   7   0   5   31.00   25.60
   7   0   5   17.90   18.90
  -7   0  -5   12.00   26.50
  -7   0  -5   -0.10   24.10
  -7   0  -5   15.30   30.90
   8   0   5   14.20   21.40
   8   0   5  -21.00   24.90
   8   0   5    4.00   20.00
  -8   0  -5   45.10   26.50
  -8   0  -5    2.10   32.60
   9   0   5    4.50   21.50
   9   0   5    9.20   26.40
   9   0   5  -20.90   21.10
  -9   0  -5   41.80   34.90
  -9   0  -5  -18.90   24.40
  10   0   5  169.08   36.00
  10   0   5  204.98   40.40
 -10   0  -5  145.59   45.10
 -10   0  -5  180.78   37.00
  11   0   5   20.50   31.20
  11   0   5   43.30   29.20
 -11   0  -5   11.80   39.30
 -11   0  -5  101.29   32.20
  12   0   5  -20.50   26.10
  12   0   5  -21.10   31.40
 -12   0  -5  -14.10   28.00
 -12   0  -5   41.70   43.00
  13   0   5  -20.00   26.90
  13   0   5   -9.30   36.10
 -13   0  -5   15.10   31.30
 -13   0  -5   89.59   49.70
  14   0   5  -11.20   29.70
  14   0   5   28.60   37.40
 -14   0  -5   62.69   34.00
 -14   0  -5   18.00   50.89
  15   0   5   -8.10   39.10
  15   0   5   23.30   29.50
 -15   0  -5  -55.59   51.79
 -15   0  -5   42.30   35.20
  16   0   5  -35.00   38.10
  16   0   5   -1.30   32.80
 -16   0  -5   76.99   59.39
 -16   0  -5   18.30   46.10
  17   0   5  -34.40   47.60
  17   0   5  -15.70   32.80
 -17   0  -5  -10.40   59.09
  18   0   5   77.89   57.99
  18   0   5  -71.69   33.90
 -18   0  -5  -45.90   70.59
  19   0   5   -6.90   59.89
  19   0   5  -22.60   43.90
 -19   0  -5  -76.19   85.89
 -19   0   6   80.59   71.69
  19   0  -6  -82.39   93.29
  19   0  -6   95.79   69.49
 -18   0   6   93.69   60.69
  18   0  -6   -7.80   50.79
  18   0  -6    2.30   63.89
 -17   0   6   55.89   52.59
  17   0  -6  -25.60   52.69
  17   0  -6  -11.10   44.40
 -16   0   6  -63.19   43.90
  16   0  -6  -56.39   32.40
  16   0  -6   18.90   43.10
  16   0  -6   23.60   51.69
 -15   0   6   14.40   37.50
  15   0  -6   39.30   34.00
  15   0  -6   57.39   48.00
  15   0  -6   53.89   41.50
 -14   0   6  -11.30   36.70
  14   0  -6  -13.40   30.30
  14   0  -6   23.20   42.10
  14   0  -6  -35.50   38.20
 -13   0   6   67.09   38.10
  13   0  -6   85.39   44.40
  13   0  -6   87.49   33.10
  13   0  -6   37.00   38.10
 -12   0   6  -11.50   16.10
 -12   0   6  -25.80   31.10
  12   0  -6   32.00   33.90
  12   0  -6   35.90   40.60
  12   0  -6  -10.50   27.90
 -11   0   6  -63.59   29.10
 -11   0   6   20.50   18.30
  11   0  -6    1.70   31.60
  11   0  -6   43.00   28.10
  11   0  -6   38.40   40.00
 -10   0   6   41.90   29.80
 -10   0   6   33.00   18.60
  10   0  -6  -12.20   28.40
  10   0  -6   62.19   36.00
  10   0  -6   17.40   24.90
  -9   0   6   35.60   20.10
  -9   0   6   15.70   27.80
  -9   0   6   12.20   20.70
   9   0  -6   34.50   24.50
   9   0  -6   41.00   32.00
   9   0  -6   63.39   28.90
  -8   0   6   33.30   19.70
  -8   0   6   10.20   18.00
  -8   0   6   -2.10   23.60
   8   0  -6  -23.10   28.40
   8   0  -6   39.00   26.30
   8   0  -6   -2.00   20.20
   8   0  -6   12.80   22.10
  -7   0   6   19.90   22.10
  -7   0   6  104.89   21.30
   7   0  -6   63.89   23.20
   7   0  -6   47.80   27.30
   7   0  -6   19.30   23.00
   7   0  -6  107.39   31.10
  -6   0   6   15.20   16.90
  -6   0   6   23.00   19.00
   6   0  -6   25.30   24.40
   6   0  -6    8.90   20.00
   6   0  -6   43.40   19.50
  -5   0   6 1483.45  155.28
  -5   0   6 1445.96  154.08
   5   0  -6 1517.65  156.08
   5   0  -6 1470.05  157.08
   5   0  -6 1580.74  159.38
  -4   0   6  137.19   25.10
  -4   0   6  161.18   23.80
  -4   0   6  184.38   25.90
   4   0  -6  138.29   28.80
   4   0  -6  156.48   27.00
   4   0  -6  165.58   31.60
  -3   0   6 2399.86  239.48
  -3   0   6 2257.67  242.48
  -3   0   6 2422.96  241.78
   3   0  -6 2158.08  243.08
   3   0  -6 2436.06  243.98
   3   0  -6 2448.75  242.68
  -2   0   6   16.00    9.40
  -2   0   6    0.30    8.10
  -2   0   6   43.00   18.50
  -2   0   6   -9.50   13.50
   2   0  -6   54.69   21.10
   2   0  -6   59.49   19.80
   2   0  -6   61.89   19.70
  -1   0   6   80.69   19.10
  -1   0   6   71.29   21.70
  -1   0   6  106.79   19.50
  -1   0   6   81.09   13.70
  -1   0   6   48.90   20.50
   1   0  -6  103.89   25.00
   1   0  -6  103.39   21.90
   0   0   6  114.19   21.00
   0   0   6   95.79   22.90
   0   0   6  127.99   20.30
   0   0   6  111.39   23.20
   0   0   6  137.59   18.40
   0   0  -6   84.19   25.40
   0   0  -6   85.69   18.90
   0   0  -6   91.69   21.80
   1   0   6   67.49   17.80
   1   0   6   71.89   16.70
   1   0   6   65.89   21.50
   1   0   6   80.19   20.00
  -1   0  -6   50.09   23.00
  -1   0  -6   44.00   19.70
  -1   0  -6   40.90   22.20
  -1   0  -6   49.80   17.70
   2   0   6   65.79   15.10
   2   0   6   82.99   16.40
   2   0   6   71.79   20.10
   2   0   6   69.89   19.50
  -2   0  -6   44.90   22.80
  -2   0  -6   62.29   17.80
  -2   0  -6   78.59   21.90
  -2   0  -6   52.09   24.00
   3   0   6 2372.66  230.88
   3   0   6 2077.19  230.28
   3   0   6 2303.07  228.78
   3   0   6 2138.69  228.78
  -3   0  -6 2283.27  231.08
  -3   0  -6 2326.37  229.38
  -3   0  -6 2133.69  231.18
  -3   0  -6 2351.66  232.78
   4   0   6  134.49   26.20
   4   0   6  114.19   21.30
   4   0   6  144.39   29.30
  -4   0  -6  111.39   30.60
  -4   0  -6  107.19   20.20
  -4   0  -6  190.18   26.10
  -4   0  -6  168.28   27.50
  -4   0  -6  158.58   30.90
   5   0   6 1527.05  143.99
   5   0   6 1494.35  141.99
  -5   0  -6 1445.26  144.79
  -5   0  -6 1234.58  145.19
  -5   0  -6 1504.25  142.89
  -5   0  -6 1208.08  139.89
  -5   0  -6 1194.68  145.59
   6   0   6  -12.10   16.70
   6   0   6  -17.30   18.80
  -6   0  -6    3.00   24.90
  -6   0  -6   14.50   19.40
  -6   0  -6   36.80   29.70
   7   0   6   48.80   21.70
   7   0   6   37.00   19.90
  -7   0  -6   20.10   23.30
  -7   0  -6   -5.50   30.90
  -7   0  -6   33.10   26.80
   8   0   6    6.90   19.90
   8   0   6  -28.10   25.00
   8   0   6   -6.60   21.20
  -8   0  -6   65.39   36.30
  -8   0  -6   26.40   26.90
   9   0   6   28.00   27.80
   9   0   6    3.70   21.90
   9   0   6    0.20   22.70
  -9   0  -6    7.00   26.30
  -9   0  -6    7.40   31.60
  10   0   6   14.20   23.40
  10   0   6  -39.40   27.70
 -10   0  -6   56.39   41.40
 -10   0  -6   35.20   30.40
  11   0   6   83.39   31.30
  11   0   6   47.00   34.80
 -11   0  -6   90.89   45.80
 -11   0  -6   12.50   31.70
  12   0   6   29.60   31.30
  12   0   6    0.00   34.10
 -12   0  -6   36.80   32.20
 -12   0  -6   32.60   45.50
  13   0   6  -27.10   35.40
  13   0   6   40.40   29.70
 -13   0  -6  -30.90   47.30
 -13   0  -6    8.80   35.00
  14   0   6   -8.20   28.30
  14   0   6  -44.70   37.00
 -14   0  -6   17.60   34.50
 -14   0  -6   47.60   53.39
  15   0   6   75.29   34.20
  15   0   6   16.60   40.30
 -15   0  -6  -23.40   53.39
 -15   0  -6   -4.40   36.20
  16   0   6   27.90   43.00
  16   0   6  -23.40   32.20
 -16   0  -6   -2.60   57.79
 -16   0  -6   27.40   38.90
  17   0   6  -64.69   42.70
  17   0   6    5.80   31.50
 -17   0  -6  -41.80   59.39
  18   0   6   46.20   39.50
  18   0   6  -56.79   52.79
 -18   0  -6   17.40   76.09
  19   0   6  -43.30   40.50
 -19   0  -6  103.49  116.49
 -18   0   7   95.09   64.29
  18   0  -7   80.69   59.29
  18   0  -7   72.29   69.49
 -17   0   7  -54.29   46.30
  17   0  -7  -35.20   49.40
  17   0  -7  -26.20   46.90
 -16   0   7   19.00   46.40
  16   0  -7   69.59   39.00
  16   0  -7   79.29   53.29
  16   0  -7   -4.00   45.30
 -15   0   7    2.40   41.10
  15   0  -7  -12.30   34.30
  15   0  -7   63.09   46.40
  15   0  -7  -93.69   38.40
 -14   0   7  -42.50   34.90
  14   0  -7  -10.60   41.80
  14   0  -7   10.40   32.40
  14   0  -7  -40.30   35.90
 -13   0   7  -24.00   32.60
  13   0  -7   -7.50   34.40
  13   0  -7    4.50   40.40
  13   0  -7   22.30   32.20
 -12   0   7    4.50   17.20
 -12   0   7    2.00   31.90
  12   0  -7   -5.30   39.20
  12   0  -7  -20.10   25.80
  12   0  -7  -17.80   33.30
 -11   0   7  -52.39   28.10
 -11   0   7   -5.70   18.20
  11   0  -7  -12.20   26.60
  11   0  -7   35.10   38.00
  11   0  -7   16.20   32.70
 -10   0   7   97.19   24.60
 -10   0   7   70.59   30.90
  10   0  -7   31.80   26.90
  10   0  -7   86.49   35.50
  10   0  -7   43.00   36.00
  -9   0   7  -10.60   24.10
  -9   0   7    5.40   20.90
   9   0  -7    4.40   29.00
   9   0  -7   30.40   31.80
   9   0  -7  -17.40   21.60
   9   0  -7   11.40   24.00
  -8   0   7  -22.40   17.70
  -8   0   7    0.40   22.30
   8   0  -7   -5.80   22.60
   8   0  -7  -28.40   25.30
   8   0  -7   -6.00   21.60
  -7   0   7  213.48   33.10
  -7   0   7  214.78   34.40
   7   0  -7  321.27   37.40
   7   0  -7  213.38   37.30
   7   0  -7  163.08   39.00
  -6   0   7   63.19   19.90
  -6   0   7   38.80   19.60
   6   0  -7   77.39   28.60
   6   0  -7   51.69   22.30
   6   0  -7   81.29   26.00
  -5   0   7  144.89   21.70
  -5   0   7   99.39   22.80
  -5   0   7  110.09   22.00
   5   0  -7  116.69   25.40
   5   0  -7   61.99   23.90
   5   0  -7  110.69   29.80
  -4   0   7  710.83   75.29
  -4   0   7  697.83   78.39
   4   0  -7  754.62   82.79
   4   0  -7  743.23   80.69
   4   0  -7  690.43   79.99
  -3   0   7  563.94   57.29
  -3   0   7  610.94   62.39
   3   0  -7  529.65   63.49
   3   0  -7  447.86   64.09
   3   0  -7  509.45   64.79
  -2   0   7  211.48   29.50
  -2   0   7  139.59   26.90
  -2   0   7  166.08   20.00
   2   0  -7  140.29   27.20
   2   0  -7  150.38   30.40
   2   0  -7  193.78   29.70
  -1   0   7  933.51   98.09
  -1   0   7  943.01   98.39
  -1   0   7  870.51   93.19
   1   0  -7  879.41   97.29
   1   0  -7  963.50   99.49
   0   0   7    8.10   17.30
   0   0   7   -1.40   15.00
   0   0   7   -2.50   18.90
   0   0   7    7.00   14.10
   0   0   7    0.10   12.20
   0   0  -7    7.90   18.20
   0   0  -7   13.60   14.30
   0   0  -7    1.60   23.00
   1   0   7  858.81   84.99
   1   0   7  746.33   87.59
   1   0   7  789.42   83.79
   1   0   7  814.72   86.59
  -1   0  -7  694.53   84.19
  -1   0  -7  799.52   86.09
  -1   0  -7  827.62   89.59
  -1   0  -7  840.12   87.69
   2   0   7  164.38   23.20
   2   0   7  183.68   27.50
   2   0   7  142.69   24.50
   2   0   7  175.88   28.90
  -2   0  -7  200.58   31.40
  -2   0  -7  198.08   31.40
  -2   0  -7  152.48   33.60
  -2   0  -7  164.18   26.60
   3   0   7  487.15   59.89
   3   0   7  542.45   57.29
   3   0   7  534.05   56.99
   3   0   7  553.74   60.69
  -3   0  -7  468.35   65.29
  -3   0  -7  510.55   62.69
  -3   0  -7  516.65   62.29
  -3   0  -7  510.05   58.29
   4   0   7  617.54   73.99
   4   0   7  701.63   75.29
   4   0   7  715.33   71.19
  -4   0  -7  701.73   78.09
  -4   0  -7  675.73   75.09
  -4   0  -7  648.84   71.09
  -4   0  -7  522.65   77.09
   5   0   7   87.69   19.60
   5   0   7   84.59   24.00
  -5   0  -7   75.89   32.10
  -5   0  -7  123.49   23.60
  -5   0  -7   95.09   17.90
  -5   0  -7   78.39   29.60
   6   0   7   61.59   18.70
   6   0   7   68.79   22.90
  -6   0  -7   29.60   26.90
  -6   0  -7   41.50   21.40
  -6   0  -7   41.80   13.50
  -6   0  -7   69.29   32.50
   7   0   7  183.08   31.40
   7   0   7  179.68   29.30
  -7   0  -7  199.08   42.50
  -7   0  -7  143.19   30.80
  -7   0  -7  183.48   38.80
   8   0   7   -2.90   20.00
   8   0   7    9.70   19.80
   8   0   7   13.00   27.20
  -8   0  -7    8.90   34.00
  -8   0  -7   63.19   29.10
   9   0   7   -7.60   23.30
   9   0   7   38.20   29.00
   9   0   7   16.30   22.30
  -9   0  -7   20.30   36.80
  -9   0  -7   -5.60   31.20
  10   0   7   11.70   24.80
  10   0   7   68.29   31.50
  10   0   7   90.29   28.20
 -10   0  -7    8.60   39.90
 -10   0  -7   61.59   34.10
  11   0   7   27.00   33.90
  11   0   7   21.60   27.20
 -11   0  -7  -22.60   43.20
 -11   0  -7  -17.50   33.10
  12   0   7   58.09   35.10
  12   0   7   -8.10   31.00
 -12   0  -7   46.10   49.00
 -12   0  -7   -9.60   33.90
  13   0   7  -10.80   35.80
  13   0   7   27.70   34.50
 -13   0  -7 -103.19   46.90
 -13   0  -7   40.60   37.40
  14   0   7    4.50   29.20
  14   0   7  -32.40   36.50
 -14   0  -7   14.80   53.39
 -14   0  -7   14.10   38.20
  15   0   7   49.80   32.30
  15   0   7   36.10   41.80
 -15   0  -7   42.90   39.10
 -15   0  -7  -14.60   56.49
  16   0   7   51.99   47.30
  16   0   7   21.50   34.50
 -16   0  -7   15.50   61.69
 -16   0  -7   59.59   42.90
  17   0   7   15.10   37.00
  17   0   7  -18.40   46.20
 -17   0  -7  -15.60   68.29
  18   0   7  -61.99   55.99
  18   0   7    6.20   37.50
 -18   0  -7   40.50   74.89
  19   0   7  -10.80   57.19
  18   0  -8   -6.40   62.99
  18   0  -8  -33.30   57.89
 -17   0   8   98.89   55.79
  17   0  -8  -14.20   54.89
  17   0  -8  -11.00   58.99
 -16   0   8   30.60   44.50
  16   0  -8   10.40   48.10
  16   0  -8  -41.90   36.70
  16   0  -8   29.90   52.99
 -15   0   8   24.70   40.10
  15   0  -8  -15.00   34.70
  15   0  -8   -7.30   41.70
  15   0  -8   71.09   49.80
 -14   0   8  -54.49   32.30
  14   0  -8   38.10   35.30
  14   0  -8  -22.40   38.90
  14   0  -8   21.90   45.30
 -13   0   8  -84.79   30.70
  13   0  -8  -59.49   35.80
  13   0  -8  -44.30   42.50
  13   0  -8  -24.10   29.50
 -12   0   8  -32.90   29.80
 -12   0   8   10.60   25.80
  12   0  -8   27.10   39.80
  12   0  -8   38.70   37.10
  12   0  -8   -2.00   29.00
 -11   0   8   13.40   21.30
 -11   0   8  -27.10   28.40
  11   0  -8   58.89   39.50
  11   0  -8   48.70   30.20
  11   0  -8   25.20   34.60
 -10   0   8   33.50   26.90
 -10   0   8    5.60   22.50
  10   0  -8  -15.80   24.80
  10   0  -8   23.30   33.10
  10   0  -8  -36.00   25.80
  -9   0   8   86.39   28.50
   9   0  -8  103.69   31.40
   9   0  -8  118.79   29.60
   9   0  -8   20.70   32.90
  -8   0   8  -31.50   20.60
  -8   0   8  -28.70   14.30
   8   0  -8   13.80   23.70
   8   0  -8   18.20   25.60
   8   0  -8   16.20   28.20
  -7   0   8  236.98   33.50
  -7   0   8  230.48   32.10
   7   0  -8  230.98   36.20
   7   0  -8  155.88   37.00
   7   0  -8  208.28   41.10
  -6   0   8  197.58   27.60
  -6   0   8  188.18   28.50
   6   0  -8  153.68   36.50
   6   0  -8  137.49   31.40
   6   0  -8  172.78   32.00
  -5   0   8  179.08   29.00
  -5   0   8  190.68   24.70
   5   0  -8  152.28   30.60
   5   0  -8  177.18   35.80
   5   0  -8  120.89   30.80
  -4   0   8   48.40   19.50
  -4   0   8   51.09   13.00
   4   0  -8   50.09   22.20
   4   0  -8   41.60   27.30
   4   0  -8   31.30   20.90
  -3   0   8   51.89   19.80
   3   0  -8   49.70   23.00
   3   0  -8   15.20   22.10
   3   0  -8   51.69   25.30
  -2   0   8  318.77   39.20
  -2   0   8  308.47   38.10
   2   0  -8  172.68   35.50
   2   0  -8  250.67   39.00
   2   0  -8  251.87   38.10
  -1   0   8  411.26   52.09
  -1   0   8  396.76   45.30
  -1   0   8  446.06   52.49
  -1   0   8  459.65   53.89
   1   0  -8  443.36   54.59
   1   0  -8  442.66   52.79
   0   0   8 1246.38  127.59
   0   0   8 1161.08  129.69
   0   0   8 1307.47  131.39
   0   0  -8 1221.28  131.19
   0   0  -8 1205.58  128.29
   0   0  -8 1322.37  133.09
   1   0   8  446.86   51.99
   1   0   8  412.16   46.80
  -1   0  -8  326.47   47.60
  -1   0  -8  514.65   55.59
  -1   0  -8  472.25   56.99
  -1   0  -8  376.36   49.70
   2   0   8  306.77   38.50
   2   0   8  267.97   36.60
   2   0   8  251.47   32.80
   2   0   8  264.77   34.80
  -2   0  -8  259.77   43.40
  -2   0  -8  304.77   43.60
  -2   0  -8  266.67   38.90
  -2   0  -8  266.17   36.80
   3   0   8   43.90   20.00
   3   0   8   15.60   13.90
   3   0   8   10.70   14.90
   3   0   8   48.50   20.50
  -3   0  -8   42.20   26.20
  -3   0  -8   28.90   18.40
  -3   0  -8   30.10   27.30
   4   0   8   27.60   15.20
   4   0   8   26.70   19.90
  -4   0  -8   20.80   27.70
  -4   0  -8   34.90   17.10
  -4   0  -8   22.40   28.30
   5   0   8  144.99   28.40
   5   0   8  157.08   23.20
  -5   0  -8  104.69   22.10
  -5   0  -8  145.89   37.60
  -5   0  -8  106.79   35.40
   6   0   8  121.29   24.30
   6   0   8  172.78   29.80
  -6   0  -8  131.19   22.10
  -6   0  -8  156.68   39.80
  -6   0  -8  160.38   28.90
  -6   0  -8  149.29   37.30
   7   0   8  204.78   33.30
   7   0   8  213.98   29.90
  -7   0  -8  208.78   43.70
  -7   0  -8  100.69   29.60
  -7   0  -8  215.68   41.20
   8   0   8   18.60   13.60
   8   0   8   -5.70   15.10
   8   0   8   -5.10   19.40
   8   0   8  -14.30   22.00
  -8   0  -8   -0.50   33.80
  -8   0  -8   57.19   33.60
   9   0   8   43.30   25.80
   9   0   8   65.79   32.50
   9   0   8   90.09   25.00
  -9   0  -8   51.09   40.90
  -9   0  -8   70.09   36.60
  10   0   8   33.90   25.40
  10   0   8   14.30   31.00
  10   0   8   59.49   26.60
 -10   0  -8  -74.49   39.90
 -10   0  -8    1.30   34.40
  11   0   8   20.30   33.90
  11   0   8   63.69   29.30
 -11   0  -8  -19.40   36.60
 -11   0  -8   77.39   48.60
  12   0   8   22.10   28.70
  12   0   8  -13.80   33.70
 -12   0  -8   32.80   48.50
 -12   0  -8  -33.50   35.50
  13   0   8    2.60   33.90
  13   0   8  -48.10   36.40
 -13   0  -8   24.40   39.50
 -13   0  -8  -16.70   51.59
  14   0   8   17.80   41.10
  14   0   8    8.50   36.20
  14   0   8  -11.40   31.10
 -14   0  -8  -23.20   53.49
 -14   0  -8  -16.00   38.20
  15   0   8  -40.00   39.30
  15   0   8   41.90   33.00
 -15   0  -8   18.00   41.80
 -15   0  -8  -64.89   53.99
  16   0   8   12.30   45.60
  16   0   8   48.80   35.20
 -16   0  -8  -20.70   40.90
 -16   0  -8    9.90   62.59
  17   0   8  -28.50   32.40
  17   0   8  -46.70   46.80
 -17   0  -8   61.59   75.39
  18   0   8   20.50   60.59
  18   0   8  -36.00   35.70
 -18   0  -8   47.00   86.19
  18   0  -9   87.39   73.69
  17   0  -9  108.59   60.59
  17   0  -9   -7.80   66.39
 -16   0   9    9.60   43.20
  16   0  -9   -6.40   51.49
  16   0  -9  -76.49   35.40
 -15   0   9  -42.90   34.80
  15   0  -9  -22.70   45.30
  15   0  -9   28.50   37.70
 -14   0   9  -34.90   34.80
  14   0  -9   -9.10   32.60
  14   0  -9  -33.20   42.00
 -13   0   9  -45.40   30.10
  13   0  -9   34.80   41.50
  13   0  -9   -1.40   31.90
 -12   0   9  -78.49   25.60
  12   0  -9  -51.89   28.40
  12   0  -9   20.80   40.00
 -11   0   9   10.20   24.00
 -11   0   9  -23.40   27.80
  11   0  -9   -8.30   35.90
  11   0  -9   -5.00   29.90
 -10   0   9   28.50   20.70
 -10   0   9  -18.80   24.90
 -10   0   9   19.80   24.60
  10   0  -9   40.00   28.90
  10   0  -9    1.30   33.60
  10   0  -9  102.69   33.30
  -9   0   9   31.10   23.90
  -9   0   9  -14.10   15.80
   9   0  -9  -13.00   26.30
   9   0  -9   10.60   27.60
   9   0  -9   15.70   32.40
  -8   0   9    3.60   17.30
  -8   0   9   12.00   21.20
   8   0  -9    1.30   25.70
   8   0  -9  -16.30   23.30
   8   0  -9   47.90   31.80
  -7   0   9  116.49   24.50
  -7   0   9   94.49   23.20
   7   0  -9  112.09   35.30
   7   0  -9  152.88   30.80
   7   0  -9  127.99   31.70
  -6   0   9   82.49   18.10
  -6   0   9   96.19   22.00
   6   0  -9   59.39   27.00
   6   0  -9   59.69   29.60
   6   0  -9   51.49   25.30
  -5   0   9  143.69   21.50
  -5   0   9  181.98   28.90
   5   0  -9  101.19   33.80
   5   0  -9  150.38   32.80
   5   0  -9  133.39   30.50
  -4   0   9  189.18   23.50
   4   0  -9  168.98   36.90
   4   0  -9  167.78   32.10
   4   0  -9  263.77   35.60
   3   0  -9   -0.10   21.90
   3   0  -9   19.20   22.60
   3   0  -9   19.50   24.00
  -2   0   9    5.80   20.10
   2   0  -9  -24.10   20.90
   2   0  -9   -6.80   20.50
  -1   0   9  260.87   29.80
  -1   0   9  276.87   38.80
   1   0  -9  244.38   39.50
   1   0  -9  224.48   38.50
   0   0   9   20.10   20.10
   0   0   9   -5.60   12.60
   0   0  -9    5.20   26.00
   0   0  -9    3.70   16.60
   0   0  -9   13.20   19.80
   1   0   9  282.57   35.30
   1   0   9  303.67   40.00
  -1   0  -9  297.67   44.10
  -1   0  -9  224.38   37.80
  -1   0  -9  278.67   37.60
   2   0   9   38.20   18.20
   2   0   9   38.80   20.20
   2   0   9  -16.30   14.20
  -2   0  -9   17.90   27.20
  -2   0  -9  -27.70   18.90
  -2   0  -9   20.60   21.80
   3   0   9   -0.60   13.10
   3   0   9   13.70   20.00
   3   0   9   -6.20   18.10
   3   0   9   28.80   13.90
  -3   0  -9  -12.90   26.60
  -3   0  -9   11.90   25.50
  -3   0  -9    8.60   19.00
   4   0   9  204.08   28.20
   4   0   9  217.58   34.70
  -4   0  -9  194.98   31.40
  -4   0  -9  185.88   39.40
  -4   0  -9  251.37   41.30
   5   0   9  145.39   29.10
   5   0   9  116.79   22.80
  -5   0  -9  138.79   25.10
  -5   0  -9  225.88   38.80
  -5   0  -9  125.39   36.20
   6   0   9   67.39   23.60
   6   0   9   33.30   17.30
  -6   0  -9   34.70   17.60
  -6   0  -9   33.70   31.50
  -6   0  -9   61.39   32.50
   7   0   9   71.89   21.30
   7   0   9  106.09   26.40
  -7   0  -9   18.50   23.20
  -7   0  -9  108.39   37.30
  -7   0  -9  108.59   39.80
  -7   0  -9   83.59   18.20
   8   0   9   10.20   20.10
   8   0   9  -19.40   13.90
   8   0   9    8.70   22.70
  -8   0  -9    3.70   36.40
  -8   0  -9   41.70   35.20
   9   0   9    0.80   24.60
   9   0   9   30.50   22.40
   9   0   9   -1.50   14.80
  -9   0  -9    5.40   36.00
  -9   0  -9   53.59   40.10
  10   0   9   11.30   24.10
  10   0   9    3.10   26.50
  10   0   9   31.90   34.50
 -10   0  -9   34.30   44.90
 -10   0  -9  -10.10   36.30
  11   0   9   -5.60   26.50
  11   0   9   34.80   33.50
 -11   0  -9   10.60   48.20
 -11   0  -9   -5.80   36.40
  12   0   9   47.00   29.20
  12   0   9  -12.50   34.00
 -12   0  -9   -4.20   36.20
 -12   0  -9  -39.60   47.50
  13   0   9   10.00   36.80
  13   0   9   57.79   31.80
 -13   0  -9    2.00   39.60
 -13   0  -9   37.00   53.19
  14   0   9  -54.79   35.50
  14   0   9   34.80   36.80
 -14   0  -9  -11.50   56.39
 -14   0  -9  -10.00   39.30
  15   0   9  -59.19   28.70
  15   0   9   29.00   43.70
  15   0   9  -14.70   39.10
 -15   0  -9   68.79   63.19
 -15   0  -9   55.19   45.50
  16   0   9  -20.40   33.30
  16   0   9    7.40   47.00
 -16   0  -9   67.39   49.80
 -16   0  -9  -19.80   62.69
  17   0   9  -12.70   50.29
  17   0   9    3.60   38.20
 -17   0  -9   57.89   75.29
  18   0   9  -49.60   38.10
  18   0   9  -83.49   60.89
 -18   0  -9  -31.30   85.49
  18   0 -10   58.89   90.79
  17   0 -10  -70.29   43.50
  17   0 -10  -32.90   57.29
  16   0 -10  -30.90   41.50
  16   0 -10   -5.50   52.59
 -15   0  10  -12.50   55.59
  15   0 -10    4.20   36.60
  15   0 -10    7.70   47.80
 -14   0  10  -54.09   31.50
  14   0 -10   23.40   36.30
  14   0 -10   -7.30   45.40
 -13   0  10  -40.50   30.10
  13   0 -10   -3.50   34.70
  13   0 -10    3.90   41.40
 -12   0  10  -16.30   28.90
  12   0 -10   91.59   36.00
  12   0 -10   -9.60   38.20
 -11   0  10   66.89   29.10
 -11   0  10   40.00   28.20
  11   0 -10   31.70   40.30
  11   0 -10  123.49   34.10
  11   0 -10   45.70   34.70
 -10   0  10   28.40   25.10
  10   0 -10   16.60   31.10
  10   0 -10   42.50   38.00
  10   0 -10   55.09   31.30
  -9   0  10   -6.20   22.70
   9   0 -10   24.30   35.40
   9   0 -10   13.10   30.30
   9   0 -10  -40.00   27.90
  -8   0  10   35.50   20.60
   8   0 -10   -5.70   26.70
   8   0 -10  -12.00   33.50
   8   0 -10   -5.30   25.10
  -7   0  10   80.19   20.50
   7   0 -10   54.79   31.10
   7   0 -10  105.29   29.80
   7   0 -10  101.19   36.40
  -6   0  10   11.50   14.40
   6   0 -10   -8.50   25.70
   6   0 -10  -23.40   27.70
   6   0 -10    9.10   24.60
  -5   0  10    0.20   11.00
   5   0 -10  -14.60   27.80
   5   0 -10  -28.90   23.90
   5   0 -10   21.00   24.10
   4   0 -10   60.19   24.40
   4   0 -10  115.29   28.50
   4   0 -10   48.50   30.00
  -3   0  10  515.85   66.39
   3   0 -10  571.54   66.79
   3   0 -10  484.05   66.89
   3   0 -10  566.94   67.59
  -2   0  10   27.40   21.00
   2   0 -10   -1.90   22.80
   2   0 -10   11.10   23.20
  -1   0  10   45.00   24.30
  -1   0  10   72.09   13.60
   1   0 -10   82.19   27.30
   1   0 -10   63.79   25.90
   0   0  10  -13.40   12.40
   0   0  10   37.60   20.90
   0   0 -10   -6.40   27.50
   0   0 -10    6.90   16.90
   0   0 -10   26.40   22.90
   1   0  10   68.69   24.60
   1   0  10  120.19   19.80
  -1   0 -10   65.99   31.70
  -1   0 -10   67.69   22.70
  -1   0 -10   68.79   24.80
   2   0  10   43.80   21.00
   2   0  10   11.50   17.10
  -2   0 -10   45.00   23.10
  -2   0 -10    5.60   20.50
  -2   0 -10   16.20   29.30
   3   0  10  456.25   53.99
   3   0  10  505.55   59.89
   3   0  10  457.15   57.49
  -3   0 -10  464.95   65.79
  -3   0 -10  491.65   58.39
  -3   0 -10  568.54   62.09
   4   0  10   98.79   19.40
   4   0  10  109.29   26.40
  -4   0 -10   77.29   31.90
  -4   0 -10  129.79   25.50
  -4   0 -10  103.89   35.50
   5   0  10    4.20   15.30
   5   0  10  -16.40   21.00
  -5   0 -10   31.10   32.00
  -5   0 -10   -9.10   29.70
  -5   0 -10  -11.50   18.70
   6   0  10    8.80   15.50
   6   0  10   65.19   24.50
  -6   0 -10    8.10   18.40
  -6   0 -10   15.00   33.30
  -6   0 -10  -18.90   31.10
   7   0  10   91.69   27.50
   7   0  10   35.20   19.30
  -7   0 -10   46.80   18.60
  -7   0 -10   58.19   38.10
  -7   0 -10  102.19   36.80
   8   0  10   43.80   21.40
   8   0  10    8.90   16.20
   8   0  10   40.70   26.00
  -8   0 -10   -5.10   34.50
  -8   0 -10   66.19   39.40
   9   0  10   -7.80   22.00
   9   0  10   35.50   19.30
   9   0  10    1.20   25.30
   9   0  10   18.90   16.40
  -9   0 -10  -16.70   34.30
  -9   0 -10   39.30   44.30
  10   0  10   43.00   25.30
  10   0  10    8.90   26.10
  10   0  10   39.80   33.60
 -10   0 -10    9.30   38.80
 -10   0 -10    7.70   44.00
  11   0  10   59.39   37.00
  11   0  10   -2.40   28.20
 -11   0 -10  -17.60   37.20
 -11   0 -10  -10.20   47.30
  12   0  10   -1.70   28.70
  12   0  10  -33.20   35.20
 -12   0 -10   32.30   53.59
 -12   0 -10   63.29   42.50
  13   0  10    6.60   30.50
  13   0  10  -36.20   33.90
 -13   0 -10  -36.50   53.19
 -13   0 -10   48.70   43.50
  14   0  10  -58.89   38.10
  14   0  10   37.00   37.30
 -14   0 -10    9.30   54.79
 -14   0 -10   -0.40   45.20
  15   0  10    6.40   40.00
  15   0  10  -47.20   41.20
 -15   0 -10   79.79   67.89
 -15   0 -10  -77.89   40.30
  16   0  10   47.50   52.69
  16   0  10    6.90   34.80
 -16   0 -10    1.50   47.10
 -16   0 -10    9.90   68.39
  17   0  10  -30.60   33.00
  17   0  10  -26.10   53.89
 -17   0 -10   64.09   77.29
 -17   0 -10   36.40   66.99
  18   0  10   25.10   45.70
  17   0 -11  -11.40   48.80
  17   0 -11  -98.29   58.59
  16   0 -11  -17.10   43.10
  16   0 -11   25.40   56.99
  15   0 -11  121.09   45.40
  15   0 -11   28.50   50.59
  14   0 -11   58.69   39.90
  14   0 -11  -56.69   44.00
 -13   0  11   14.50   37.20
  13   0 -11   98.09   48.30
  13   0 -11   89.09   40.90
 -12   0  11   16.80   29.30
  12   0 -11   28.20   35.60
  12   0 -11  -12.00   31.20
  12   0 -11  -15.70   41.00
 -11   0  11   36.10   27.20
  11   0 -11  -24.30   31.80
  11   0 -11  -22.40   38.90
  11   0 -11    1.70   30.60
 -10   0  11   28.40   24.10
  10   0 -11  -15.20   38.30
  10   0 -11   39.50   33.50
  10   0 -11   89.19   34.40
  -9   0  11   26.20   21.80
   9   0 -11  -10.40   35.60
   9   0 -11  -28.80   29.30
   9   0 -11  -15.20   29.20
  -8   0  11   -6.50   18.60
   8   0 -11   20.40   28.60
   8   0 -11   -3.20   34.90
   8   0 -11    4.10   30.30
  -7   0  11   20.70   16.10
   7   0 -11   -8.50   32.80
   7   0 -11   13.40   29.10
   7   0 -11   30.90   27.40
  -6   0  11  122.79   19.10
   6   0 -11   87.19   36.30
   6   0 -11  100.19   34.00
   6   0 -11   82.29   31.50
   5   0 -11    1.60   25.70
   5   0 -11   23.70   27.40
   5   0 -11  -32.60   29.10
   4   0 -11   -4.60   25.10
   4   0 -11   14.90   28.80
   4   0 -11   41.80   24.20
  -3   0  11   45.70   26.00
   3   0 -11   14.90   24.60
   3   0 -11   40.70   26.70
  -2   0  11  130.29   30.40
   2   0 -11  112.09   31.10
   2   0 -11  144.79   32.40
  -1   0  11  103.69   16.60
  -1   0  11   91.79   27.00
   1   0 -11  121.89   31.20
   1   0 -11  119.49   27.60
   0   0  11    7.30   20.90
   0   0  11   17.30   13.20
   0   0 -11    0.60   27.90
   0   0 -11   31.10   23.50
   0   0 -11   28.80   18.20
   1   0  11  123.59   28.60
   1   0  11  111.89   22.50
  -1   0 -11  116.79   29.30
  -1   0 -11  138.29   26.10
  -1   0 -11  170.78   36.20
   2   0  11   90.99   22.30
   2   0  11   92.29   25.90
  -2   0 -11   91.39   26.40
  -2   0 -11   57.39   33.10
  -2   0 -11  102.09   26.60
   3   0  11   46.60   22.40
   3   0  11   24.60   14.40
  -3   0 -11   47.10   26.50
  -3   0 -11    8.40   31.20
  -3   0 -11    5.70   21.90
   4   0  11   30.20   14.70
   4   0  11   21.30   22.30
  -4   0 -11  -10.80   27.60
  -4   0 -11    4.90   20.40
  -4   0 -11  -20.20   29.60
   5   0  11    3.30   21.90
   5   0  11   16.00   15.60
  -5   0 -11   18.00   33.00
  -5   0 -11   -8.10   20.40
  -5   0 -11   -7.00   32.00
   6   0  11   82.39   20.70
   6   0  11  142.79   30.80
  -6   0 -11   89.09   39.10
  -6   0 -11  103.29   25.10
  -6   0 -11  113.99   38.20
   7   0  11   12.80   17.60
   7   0  11  -18.50   23.10
  -7   0 -11   26.30   38.60
  -7   0 -11   39.40   36.90
  -7   0 -11  -18.50   18.20
   8   0  11  -31.20   18.10
   8   0  11    9.40   26.00
   8   0  11   22.40   20.80
  -8   0 -11   21.90   40.00
  -8   0 -11   20.20   37.20
   9   0  11   31.20   22.70
   9   0  11  -15.10   25.50
  -9   0 -11   15.70   38.10
  -9   0 -11   47.50   47.30
  10   0  11   21.00   28.80
  10   0  11    0.60   23.50
 -10   0 -11  -26.40   45.50
 -10   0 -11   20.30   39.70
  11   0  11   -1.70   36.60
  11   0  11  -73.79   25.60
 -11   0 -11    6.50   45.60
 -11   0 -11   13.80   41.30
  12   0  11  -80.19   33.50
  12   0  11   43.20   29.60
 -12   0 -11  111.09   55.69
 -12   0 -11   25.60   43.90
  13   0  11   46.60   32.90
  13   0  11   47.10   38.60
 -13   0 -11   39.80   45.30
 -13   0 -11   89.49   57.59
  14   0  11    2.70   42.40
  14   0  11  -26.00   29.70
 -14   0 -11  106.49   63.19
 -14   0 -11   -9.80   45.30
  15   0  11   48.30   41.40
  15   0  11   94.59   47.80
 -15   0 -11    4.40   46.80
 -15   0 -11    2.80   62.39
  16   0  11  -53.89   32.90
  16   0  11   17.90   51.99
  16   0  11   60.89   46.30
 -16   0 -11  -72.89   50.09
 -16   0 -11  116.99   75.69
  17   0  11   39.80   39.60
  17   0  11  -70.69   58.59
 -17   0 -11   52.79   82.79
 -17   0 -11  105.19   65.39
  17   0 -12   53.09   73.99
  17   0 -12 -107.59   50.89
  16   0 -12    2.70   45.90
  16   0 -12   -8.60   60.79
  15   0 -12  -25.50   54.29
  15   0 -12   -7.30   40.50
  14   0 -12  -10.70   38.50
  14   0 -12   -6.20   48.90
  13   0 -12  -28.10   46.80
  13   0 -12   -4.00   36.50
  12   0 -12   41.90   38.70
  12   0 -12   19.30   34.40
  12   0 -12  -45.40   41.40
 -11   0  12   -3.60   30.70
  11   0 -12   33.60   42.10
  11   0 -12   47.40   37.70
  11   0 -12   12.70   34.30
 -10   0  12  -10.70   21.60
  10   0 -12  -49.10   31.00
  10   0 -12 -126.09   32.50
  10   0 -12   -2.50   33.40
  -9   0  12   30.00   20.80
   9   0 -12   -5.00   37.90
   9   0 -12   88.09   34.80
   9   0 -12  102.19   38.10
  -8   0  12   18.40   17.10
   8   0 -12  -16.40   36.70
   8   0 -12  -61.49   28.40
   8   0 -12   63.19   34.10
  -7   0  12   -6.00   13.60
   7   0 -12   34.00   31.00
   7   0 -12   28.10   30.20
   7   0 -12  -19.50   34.60
   6   0 -12   43.00   33.60
   6   0 -12  -21.40   28.10
   6   0 -12   38.70   30.40
   5   0 -12   20.90   32.30
   5   0 -12   90.29   32.10
   5   0 -12   81.99   32.00
  -4   0  12  -35.20   23.70
   4   0 -12  -54.09   26.00
   4   0 -12    7.90   26.10
   4   0 -12  -18.70   29.30
  -3   0  12  -30.90   23.30
   3   0 -12   -1.00   25.60
   3   0 -12  -10.20   23.00
  -2   0  12   39.60   24.40
   2   0 -12   27.70   23.70
   2   0 -12   11.20   25.90
  -1   0  12  -16.90   10.20
  -1   0  12   -0.60   22.10
   1   0 -12   11.40   24.90
   1   0 -12  -42.70   23.90
   0   0  12   10.30   22.60
   0   0  12   40.60   14.90
   0   0 -12   12.70   29.60
   0   0 -12   51.49   20.10
   0   0 -12   -1.10   24.10
   1   0  12   15.60   22.10
   1   0  12   -8.50   15.30
  -1   0 -12   -3.00   31.20
  -1   0 -12  -13.20   19.60
  -1   0 -12  -43.50   23.90
   2   0  12   16.80   22.50
   2   0  12   18.10   17.80
  -2   0 -12   -9.20   22.70
  -2   0 -12   -7.00   28.90
  -2   0 -12   33.80   24.30
   3   0  12  -26.80   13.20
   3   0  12   -9.10   21.10
  -3   0 -12  -29.90   21.20
  -3   0 -12   -8.10   23.40
  -3   0 -12   58.59   32.90
   4   0  12    0.10   22.20
   4   0  12  -37.70   12.90
  -4   0 -12  -41.90   20.90
  -4   0 -12   15.30   33.80
  -4   0 -12  -10.10   26.90
   5   0  12   65.09   17.80
   5   0  12   35.50   24.60
  -5   0 -12   87.39   35.80
  -5   0 -12   42.00   34.70
  -5   0 -12   27.90   23.70
   6   0  12   -9.60   15.60
   6   0  12   -3.10   24.40
  -6   0 -12  -28.40   35.30
  -6   0 -12   21.70   35.30
  -6   0 -12   -9.70   21.90
   7   0  12    2.80   16.80
   7   0  12    8.20   25.80
  -7   0 -12   -1.80   21.10
  -7   0 -12   41.70   38.70
  -7   0 -12    7.00   36.20
   8   0  12   34.40   27.70
   8   0  12  -14.30   18.70
  -8   0 -12   -9.40   41.00
  -8   0 -12   25.40   19.90
  -8   0 -12   29.40   39.80
   9   0  12   73.69   23.60
   9   0  12   54.29   29.20
  -9   0 -12   11.10   38.50
  -9   0 -12   -1.00   46.60
  10   0  12   55.59   25.70
  10   0  12    2.50   28.50
 -10   0 -12   28.70   41.20
 -10   0 -12  -47.60   47.70
  11   0  12  -13.20   35.00
  11   0  12   31.10   31.90
 -11   0 -12    7.40   41.80
 -11   0 -12   58.59   53.09
  12   0  12    8.60   37.10
  12   0  12    8.60   30.70
 -12   0 -12   18.40   51.29
 -12   0 -12  -42.60   41.50
  13   0  12  -65.79   38.00
  13   0  12  -38.60   29.50
 -13   0 -12   27.30   47.00
 -13   0 -12   37.40   55.99
  14   0  12  -14.00   32.30
  14   0  12   42.50   43.10
 -14   0 -12  -40.20   58.49
 -14   0 -12   98.79   52.69
  15   0  12   36.90   40.60
  15   0  12  -34.60   44.30
 -15   0 -12  -21.50   50.29
 -15   0 -12  -26.50   66.89
  16   0  12    0.90   44.90
  16   0  12   18.20   50.79
 -16   0 -12   26.00   56.39
 -16   0 -12   35.00   77.19
  17   0  12   14.10   51.39
 -17   0 -12  -51.69   91.59
 -17   0 -12  143.19   75.69
  16   0 -13   65.79   68.39
  16   0 -13   54.79   52.79
  15   0 -13   57.19   48.70
  15   0 -13  120.09   63.79
  14   0 -13   11.50   42.90
  14   0 -13   58.79   57.99
  13   0 -13  -11.30   48.00
  13   0 -13   37.70   39.60
  12   0 -13   49.10   48.20
  12   0 -13  -36.70   39.30
  12   0 -13  -12.00   37.60
  11   0 -13   32.30   44.00
  11   0 -13   19.30   37.10
  11   0 -13   36.90   36.40
  10   0 -13   55.79   43.50
  10   0 -13  -28.40   33.00
  10   0 -13  -45.60   33.50
   9   0 -13  -25.20   38.80
   9   0 -13  -11.40   31.40
   9   0 -13   10.80   33.10
  -8   0  13   31.30   22.40
   8   0 -13  -18.10   30.00
   8   0 -13   43.30   33.90
   8   0 -13   35.20   39.30
   7   0 -13   18.40   32.00
   7   0 -13  -24.60   30.70
   7   0 -13   17.20   38.00
   6   0 -13   78.49   35.30
   6   0 -13   95.39   39.80
   6   0 -13   89.49   35.00
  -5   0  13   95.99   32.80
   5   0 -13   45.60   34.00
   5   0 -13   53.69   37.40
   5   0 -13  178.18   37.40
  -4   0  13   62.59   29.10
   4   0 -13   18.40   29.60
   4   0 -13   34.60   31.00
  -3   0  13   28.90   25.50
   3   0 -13   13.90   25.70
   3   0 -13  -40.60   27.40
  -2   0  13   12.10   24.50
   2   0 -13    0.40   26.50
   2   0 -13  -34.30   27.00
  -1   0  13   21.50   11.20
  -1   0  13  -19.70   23.20
   1   0 -13   21.70   29.20
   1   0 -13   -8.80   26.20
   0   0  13  -30.70   22.10
   0   0  13   10.70   13.40
   0   0 -13  -10.70   18.10
   0   0 -13  -10.60   27.70
   0   0 -13  -53.99   23.30
   1   0  13   17.50   16.20
   1   0  13    0.20   23.10
  -1   0 -13  -22.40   33.30
  -1   0 -13  -10.20   24.90
  -1   0 -13  -24.50   20.00
   2   0  13  -24.60   21.80
   2   0  13   -6.20   16.60
  -2   0 -13   21.20   33.80
  -2   0 -13    7.80   22.60
  -2   0 -13   39.10   27.30
   3   0  13   35.50   24.70
   3   0  13   21.70   15.00
  -3   0 -13  -15.00   32.70
  -3   0 -13   28.80   27.40
  -3   0 -13  -23.60   24.20
   4   0  13   10.90   23.40
   4   0  13   11.30   14.50
  -4   0 -13   43.70   25.70
  -4   0 -13   37.90   34.80
  -4   0 -13  -32.00   27.00
   5   0  13   59.59   19.20
   5   0  13  118.29   29.90
  -5   0 -13  146.39   38.10
  -5   0 -13   68.29   28.30
  -5   0 -13   68.69   39.30
   6   0  13   40.70   17.60
   6   0  13   51.69   27.90
  -6   0 -13   40.20   25.90
  -6   0 -13   13.40   37.00
  -6   0 -13   82.99   38.50
   7   0  13   25.60   18.40
   7   0  13   47.60   28.80
  -7   0 -13   66.79   43.20
  -7   0 -13   -0.20   23.60
  -7   0 -13   15.30   40.00
   8   0  13  -25.80   18.50
   8   0  13    8.00   29.00
  -8   0 -13   -2.70   43.70
  -8   0 -13   23.20   21.80
  -8   0 -13   -1.40   40.20
   9   0  13   59.79   30.70
   9   0  13   34.60   22.70
  -9   0 -13  -68.09   39.30
  -9   0 -13   -4.80   47.20
  10   0  13  -60.99   26.80
 -10   0 -13   -8.50   42.80
 -10   0 -13   29.40   50.89
  11   0  13   39.70   32.20
 -11   0 -13  -22.60   51.79
 -11   0 -13  -18.80   42.20
  12   0  13   62.39   44.60
  12   0  13  -11.00   30.50
 -12   0 -13   68.89   58.69
 -12   0 -13    8.40   46.20
  13   0  13  -43.00   37.00
  13   0  13  -18.40   31.40
 -13   0 -13    9.50   48.30
 -13   0 -13   -9.30   53.89
  14   0  13  -34.60   43.10
  14   0  13  -11.00   32.80
 -14   0 -13  101.19   65.69
 -14   0 -13   10.20   52.19
  15   0  13   77.99   38.30
  15   0  13   74.29   54.99
 -15   0 -13  -63.19   52.89
 -15   0 -13  -14.60   68.89
  16   0  13   23.90   58.69
 -16   0 -13   -1.50   62.69
 -16   0 -13  140.69   83.69
  16   0 -14   47.90   67.19
  16   0 -14   -7.80   79.39
  15   0 -14  -41.50   63.89
  15   0 -14  -79.59   46.30
  14   0 -14   30.90   57.39
  14   0 -14   53.99   45.50
  13   0 -14  -32.20   38.50
  13   0 -14   -5.60   51.99
  12   0 -14   54.39   41.50
  12   0 -14   43.30   49.70
  11   0 -14   22.30   40.00
  11   0 -14   81.39   49.10
  11   0 -14  -26.60   36.90
  10   0 -14  -87.29   33.60
  10   0 -14   20.80   46.20
  10   0 -14   41.10   37.30
   9   0 -14   -4.20   34.70
   9   0 -14   -8.30   31.70
   9   0 -14  -38.00   40.10
   8   0 -14   16.70   31.70
   8   0 -14   44.80   37.10
   8   0 -14   50.09   44.00
   7   0 -14   -9.40   28.70
   7   0 -14   35.00   40.50
   7   0 -14   -3.70   34.30
  -6   0  14   21.40   30.20
   6   0 -14    9.40   37.60
   6   0 -14   -8.70   32.10
   6   0 -14   52.49   34.60
  -5   0  14   -0.10   29.00
   5   0 -14   31.20   32.80
   5   0 -14   24.30   33.10
  -4   0  14   14.10   28.80
   4   0 -14   -7.20   31.00
   4   0 -14   -4.10   31.60
  -3   0  14  -49.80   24.60
   3   0 -14   38.40   31.40
   3   0 -14   14.60   31.60
  -2   0  14   41.70   26.80
   2   0 -14   28.60   30.90
   2   0 -14   12.30   30.30
  -1   0  14   -0.80   26.10
  -1   0  14   25.60   11.40
   1   0 -14  -77.29   25.40
   1   0 -14   29.80   31.00
   0   0  14   15.00   14.30
   0   0  14   13.70   25.00
   0   0 -14    8.40   30.30
   0   0 -14    4.00   27.70
   1   0  14  -23.70   23.20
   1   0  14  -18.90   16.20
  -1   0 -14  -33.10   21.20
  -1   0 -14   17.70   33.80
  -1   0 -14  -10.00   26.40
   2   0  14   51.39   27.30
   2   0  14  -18.50   15.40
   2   0  14    3.40   19.00
  -2   0 -14  -11.50   23.80
  -2   0 -14   11.60   34.60
  -2   0 -14   10.50   28.30
   3   0  14   41.00   26.40
   3   0  14   13.60   15.40
  -3   0 -14   43.60   36.90
  -3   0 -14   15.00   27.90
  -3   0 -14   34.00   29.10
   4   0  14  -26.50   24.20
   4   0  14    0.30   14.70
  -4   0 -14   16.80   38.00
  -4   0 -14   10.30   26.60
  -4   0 -14    4.80   30.80
   5   0  14  -10.00   25.70
   5   0  14   23.70   15.90
  -5   0 -14    7.80   38.60
  -5   0 -14  -19.30   25.70
  -5   0 -14   39.30   36.50
   6   0  14   16.70   28.50
   6   0  14  -11.70   16.10
  -6   0 -14  -19.80   39.80
  -6   0 -14    1.10   37.90
  -6   0 -14    4.60   25.70
   7   0  14   12.20   17.30
   7   0  14   40.00   29.70
  -7   0 -14   22.90   42.40
  -7   0 -14  -10.10   24.30
  -7   0 -14   27.70   38.50
   8   0  14   48.20   21.10
   8   0  14   97.69   32.50
  -8   0 -14  -17.70   45.60
  -8   0 -14   31.00   25.80
  -8   0 -14   50.09   42.90
   9   0  14  -38.10   27.30
   9   0  14    1.70   22.70
  -9   0 -14   13.20   43.60
  -9   0 -14   56.09   50.09
  10   0  14  -96.79   25.80
 -10   0 -14  -36.60   44.30
 -10   0 -14   23.70   53.49
  11   0  14  -17.90   31.30
 -11   0 -14   -4.70   48.70
 -11   0 -14   23.10   55.09
  12   0  14  -16.10   39.30
  12   0  14   37.80   34.60
 -12   0 -14   -5.00   49.20
 -12   0 -14   98.99   61.59
  13   0  14  -23.20   41.80
  13   0  14  -32.30   34.30
 -13   0 -14  -26.40   57.99
 -13   0 -14  -31.60   49.70
  14   0  14  -26.70   44.30
  14   0  14  -32.40   35.70
 -14   0 -14  -53.79   51.59
 -14   0 -14 -102.29   59.09
  15   0  14   -4.00   37.30
  15   0  14  -36.70   52.39
 -15   0 -14  -43.40   59.79
 -15   0 -14  -21.40   73.39
 -16   0 -14  -75.69   72.39
 -16   0 -14   70.99   96.79
  15   0 -15  -44.10   67.19
  15   0 -15   69.49   56.69
  14   0 -15  -25.20   47.00
  14   0 -15   88.09   65.79
  13   0 -15  -51.89   52.19
  13   0 -15  -39.30   39.70
  12   0 -15    0.40   41.60
  12   0 -15    3.10   52.19
  11   0 -15   25.50   40.70
  11   0 -15   29.20   39.80
  11   0 -15  -38.40   47.80
  10   0 -15   19.90   36.30
  10   0 -15   -1.00   38.10
  10   0 -15   88.49   49.99
   9   0 -15   75.99   41.20
   9   0 -15   28.60   47.00
   9   0 -15   99.19   43.00
   8   0 -15   -3.80   34.90
   8   0 -15  108.09   46.50
   8   0 -15   39.20   36.80
  -7   0  15   -5.70   33.00
   7   0 -15   26.10   32.50
   7   0 -15  -60.69   33.00
   7   0 -15   76.49   44.40
  -6   0  15   77.39   34.70
   6   0 -15   70.19   39.00
   6   0 -15   71.19   43.00
   6   0 -15   25.40   37.50
  -5   0  15   68.29   34.80
   5   0 -15   36.10   37.40
   5   0 -15   97.89   34.60
  -4   0  15   66.19   31.60
   4   0 -15  -17.90   32.30
   4   0 -15   53.99   36.00
  -3   0  15  -17.60   26.60
   3   0 -15  -25.60   32.80
   3   0 -15    9.00   32.60
  -2   0  15  -36.70   26.00
   2   0 -15   -1.30   31.60
   2   0 -15   15.00   32.90
  -1   0  15  -26.30   25.60
   1   0 -15  -33.80   31.30
   1   0 -15    1.20   29.60
   0   0  15  -13.70   14.00
   0   0  15   24.00   26.40
   0   0 -15    3.50   30.40
   0   0 -15    5.50   32.70
   1   0  15  -19.20   24.70
   1   0  15   20.90   17.50
  -1   0 -15   26.90   24.00
  -1   0 -15   17.70   31.10
   2   0  15   51.19   27.50
   2   0  15   21.20   17.20
  -2   0 -15   32.40   26.10
  -2   0 -15   31.20   39.90
  -2   0 -15    5.10   27.90
   3   0  15    7.60   27.00
   3   0  15    6.40   15.10
  -3   0 -15   38.80   41.30
  -3   0 -15   29.10   30.40
  -3   0 -15  -11.30   27.10
   4   0  15   28.70   15.50
   4   0  15    1.00   26.50
  -4   0 -15   -2.80   32.30
  -4   0 -15   29.20   29.60
  -4   0 -15   -8.80   38.90
   5   0  15   91.99   20.80
   5   0  15   87.69   32.20
  -5   0 -15  140.79   42.10
  -5   0 -15  112.89   34.60
  -5   0 -15  100.09   46.00
   6   0  15   54.59   32.30
   6   0  15   24.70   17.70
  -6   0 -15   74.19   31.70
  -6   0 -15   48.00   37.50
  -6   0 -15   40.50   43.80
   7   0  15  -57.89   28.20
  -7   0 -15   66.69   44.50
  -7   0 -15   13.90   43.40
  -7   0 -15  -16.00   27.10
   8   0  15   69.09   33.60
  -8   0 -15   69.89   46.50
  -8   0 -15   50.59   41.20
  -8   0 -15   13.30   45.10
   9   0  15   53.39   36.10
  -9   0 -15  108.69   52.59
  -9   0 -15   31.00   45.00
  10   0  15  -11.50   31.30
 -10   0 -15   -0.10   51.49
 -10   0 -15   35.90   49.60
  11   0  15  -64.89   32.00
 -11   0 -15   72.79   55.99
 -11   0 -15    5.30   48.20
  12   0  15    0.40   34.70
  12   0  15   20.00   43.20
 -12   0 -15   10.00   57.99
 -12   0 -15  -43.40   52.49
  13   0  15  -56.09   46.90
  13   0  15   33.80   36.90
 -13   0 -15  -34.60   52.89
 -13   0 -15   -7.30   60.59
  14   0  15   25.50   38.10
  14   0  15  -32.10   51.79
 -14   0 -15  -23.90   62.39
 -14   0 -15  -41.40   74.29
  15   0  15   -0.20   57.49
 -15   0 -15  225.98   91.89
 -15   0 -15   -4.80   68.79
  14   0 -16  -15.20   52.99
  14   0 -16 -125.39   61.49
  13   0 -16   14.60   61.19
  13   0 -16  -34.90   47.40
  12   0 -16   19.80   45.00
  12   0 -16  128.49   59.99
  11   0 -16   16.00   51.79
  11   0 -16  -25.90   36.80
  11   0 -16   20.40   47.80
  10   0 -16   16.60   42.00
  10   0 -16   -4.70   40.70
  10   0 -16    2.60   48.80
   9   0 -16  -22.50   38.90
   9   0 -16   -4.60   47.30
   9   0 -16   29.50   41.20
  -8   0  16   14.20   35.60
   8   0 -16   10.30   47.40
   8   0 -16   21.70   38.70
   8   0 -16    1.50   38.70
  -7   0  16    4.00   33.90
   7   0 -16   53.59   40.10
   7   0 -16  -33.30   43.70
   7   0 -16  -22.80   33.70
  -6   0  16  -11.30   32.80
   6   0 -16   24.70   37.70
   6   0 -16   70.59   38.40
  -5   0  16   28.30   33.10
   5   0 -16    3.80   30.70
   5   0 -16   33.40   36.30
  -4   0  16   31.50   33.50
   4   0 -16    3.30   34.80
   4   0 -16   58.19   38.60
  -3   0  16    6.30   29.30
   3   0 -16   -5.70   34.50
   3   0 -16   -9.80   32.90
  -2   0  16   31.50   29.90
   2   0 -16   13.70   30.90
   2   0 -16  -32.80   33.50
  -1   0  16   -4.50   28.70
   1   0 -16   -8.40   33.40
   1   0 -16  -13.60   31.50
   0   0  16   19.00   28.70
   0   0 -16  -21.30   29.70
   0   0 -16  -39.20   33.20
   1   0  16    6.60   27.80
  -1   0 -16   43.10   25.60
  -1   0 -16   16.70   30.30
  -1   0 -16   25.40   37.80
   2   0  16   27.80   17.30
   2   0  16   49.60   29.70
  -2   0 -16   32.70   27.90
  -2   0 -16   51.99   33.20
   3   0  16   -7.50   15.10
   3   0  16   26.30   28.40
  -3   0 -16   10.40   40.20
  -3   0 -16   66.79   32.00
  -3   0 -16   15.50   28.10
   4   0  16   53.99   29.40
  -4   0 -16   66.29   35.80
  -4   0 -16   11.60   42.60
  -4   0 -16   42.70   33.00
   5   0  16   40.40   30.20
  -5   0 -16   17.40   41.90
  -5   0 -16   19.90   31.80
  -5   0 -16   48.60   38.60
   6   0  16   14.80   32.00
  -6   0 -16  103.19   34.70
  -6   0 -16   45.80   45.70
  -6   0 -16   71.29   42.60
   7   0  16   25.40   30.00
  -7   0 -16   -9.50   29.80
  -7   0 -16   46.40   45.80
  -7   0 -16   50.29   46.40
   8   0  16   17.70   31.40
  -8   0 -16   23.70   45.50
  -8   0 -16   26.50   48.90
   9   0  16  -29.10   30.40
  -9   0 -16  -11.50   46.60
  -9   0 -16  -44.60   49.90
  10   0  16  -26.60   34.70
 -10   0 -16   44.30   56.09
 -10   0 -16  -36.90   47.60
  11   0  16   14.00   34.50
 -11   0 -16    2.00   54.19
 -11   0 -16   10.60   53.39
  12   0  16  -20.50   35.50
  12   0  16  -39.10   45.40
 -12   0 -16   -6.20   55.99
 -12   0 -16   64.09   61.19
  13   0  16   26.60   37.40
  13   0  16  -40.30   51.49
 -13   0 -16  162.58   72.29
 -13   0 -16   70.29   66.19
  14   0  16  -13.60   44.00
  14   0  16  -50.69   56.59
 -14   0 -16  -95.79   56.79
 -14   0 -16   59.69   77.69
  14   0 -17  -26.10   76.29
  14   0 -17  112.49   84.19
  13   0 -17   -7.20   53.39
  13   0 -17  -73.89   63.69
  12   0 -17   79.49   49.70
  12   0 -17   46.70   63.69
  11   0 -17   16.00   46.10
  11   0 -17   54.29   58.09
 -10   0  17   -1.40   40.80
  10   0 -17  -27.40   50.19
  10   0 -17  -78.89   39.10
  10   0 -17  -12.10   42.80
  -9   0  17    2.80   39.30
   9   0 -17  -67.29   39.70
   9   0 -17   -2.70   42.30
   9   0 -17  -27.90   47.20
  -8   0  17   11.30   37.60
   8   0 -17    6.00   42.30
   8   0 -17   35.90   41.20
  -7   0  17   69.89   40.00
   7   0 -17  100.09   42.30
   7   0 -17   45.60   40.70
  -6   0  17   84.79   38.30
   6   0 -17  -22.10   37.50
   6   0 -17   -5.30   38.50
  -5   0  17    7.70   33.20
   5   0 -17   20.40   36.70
   5   0 -17    1.80   36.90
  -4   0  17   -1.10   32.60
   4   0 -17   15.50   37.70
   4   0 -17   26.70   33.40
  -3   0  17   47.30   32.40
   3   0 -17   12.80   37.70
   3   0 -17   19.40   35.60
  -2   0  17   -3.90   29.40
   2   0 -17   18.80   37.50
   2   0 -17  -17.10   33.70
  -1   0  17   65.39   33.30
   1   0 -17   24.80   36.70
   1   0 -17   30.30   35.60
   0   0  17   -1.30   29.70
   0   0 -17    7.40   36.80
   0   0 -17  -31.70   33.20
   1   0  17   22.40   30.00
  -1   0 -17  -12.90   32.70
  -1   0 -17   58.19   38.60
   2   0  17   -5.80   28.90
  -2   0 -17   21.70   28.70
  -2   0 -17   62.39   37.00
   3   0  17  -16.50   28.50
  -3   0 -17   -4.80   30.00
  -3   0 -17   44.80   34.30
   4   0  17   29.70   28.90
  -4   0 -17  -28.30   42.00
  -4   0 -17   50.09   33.90
  -4   0 -17  -29.20   33.00
   5   0  17  -21.50   29.30
  -5   0 -17   21.30   46.30
  -5   0 -17   57.49   41.60
  -5   0 -17   24.80   34.20
   6   0  17   31.70   33.40
  -6   0 -17  -14.00   33.90
  -6   0 -17  -32.70   46.00
  -6   0 -17   27.10   43.00
   7   0  17   35.80   34.40
  -7   0 -17   44.40   33.80
  -7   0 -17   79.89   50.79
  -7   0 -17   66.89   47.20
   8   0  17   -0.60   33.50
  -8   0 -17   18.70   47.70
  -8   0 -17    2.60   51.09
   9   0  17   12.70   33.90
  -9   0 -17   61.29   51.39
  -9   0 -17  -62.29   46.80
  10   0  17  -87.49   33.30
 -10   0 -17  -65.69   47.80
 -10   0 -17  -32.50   48.10
  11   0  17   69.99   39.20
 -11   0 -17  -33.20   53.69
 -11   0 -17  -85.49   49.40
  12   0  17   38.70   38.90
 -12   0 -17  -60.09   55.79
 -12   0 -17  136.39   65.09
  13   0  17  -78.19   37.20
  13   0  17   61.29   60.49
 -13   0 -17  100.99   73.99
 -13   0 -17 -105.29   61.49
 -14   0 -17   22.20   98.29
 -14   0 -17  114.79   98.89
  13   0 -18  -17.40   64.19
  13   0 -18   57.89   79.59
 -12   0  18   16.60   54.59
  12   0 -18   37.00   55.59
  12   0 -18   35.90   66.59
 -11   0  18  -36.70   45.30
  11   0 -18    7.60   60.89
  11   0 -18   57.39   52.19
 -10   0  18   -3.80   45.10
  10   0 -18   68.29   49.50
  10   0 -18  -17.80   55.29
  10   0 -18    0.90   46.10
  -9   0  18  -51.29   37.90
   9   0 -18  -27.80   45.20
   9   0 -18  -29.40   44.30
  -8   0  18  -28.60   37.30
   8   0 -18   66.09   46.90
   8   0 -18   36.40   41.90
  -7   0  18   18.70   37.30
   7   0 -18   51.39   42.70
   7   0 -18  -15.00   42.30
  -6   0  18   -3.30   36.50
   6   0 -18   33.90   40.50
   6   0 -18   40.70   41.60
  -5   0  18   43.10   36.20
   5   0 -18   18.70   40.20
   5   0 -18   -3.10   39.60
  -4   0  18   -8.80   33.60
   4   0 -18    0.50   40.20
   4   0 -18   61.19   40.80
  -3   0  18  -26.60   32.10
   3   0 -18   -4.80   38.00
   3   0 -18   11.50   40.60
  -2   0  18   63.49   35.50
   2   0 -18   37.70   39.30
   2   0 -18   25.20   40.20
  -1   0  18  -40.60   29.50
   1   0 -18   12.60   36.70
   1   0 -18    8.60   37.20
   0   0  18  -15.50   29.30
   0   0 -18   65.89   39.20
   0   0 -18   91.49   42.30
   1   0  18   29.40   31.20
  -1   0 -18   32.70   39.50
  -1   0 -18   -3.80   38.40
   2   0  18   17.00   30.30
  -2   0 -18   49.20   41.20
  -2   0 -18   47.40   38.60
   3   0  18   -0.40   29.60
  -3   0 -18   26.60   36.90
  -3   0 -18   28.70   35.50
   4   0  18  -48.30   26.90
  -4   0 -18   51.29   38.60
  -4   0 -18   -3.90   34.20
   5   0  18   36.60   31.50
  -5   0 -18   51.69   38.10
  -5   0 -18  -77.59   41.70
  -5   0 -18  -38.40   32.70
   6   0  18  -18.20   33.40
  -6   0 -18   17.30   47.00
  -6   0 -18    6.50   35.40
  -6   0 -18   36.00   44.40
   7   0  18   45.40   34.30
  -7   0 -18  -65.39   41.90
  -7   0 -18  -36.70   48.50
   8   0  18  -43.80   32.20
  -8   0 -18  -36.10   46.50
  -8   0 -18   29.70   53.59
   9   0  18   21.80   38.20
  -9   0 -18  -80.59   47.10
  -9   0 -18   -9.60   55.89
  10   0  18   16.60   36.80
 -10   0 -18  -18.40   57.29
 -10   0 -18  -57.79   51.59
  11   0  18   44.50   39.30
 -11   0 -18   -2.70   66.29
 -11   0 -18   49.70   63.49
  12   0  18  -15.30   41.20
 -12   0 -18  -87.19   62.39
 -12   0 -18   -4.10   67.49
 -13   0 -18  -64.89   65.89
 -13   0 -18   65.49   84.39
 -12   0  19   45.80   82.39
  12   0 -19  -31.80   79.69
  12   0 -19   78.09   71.19
 -11   0  19  -37.10   52.29
  11   0 -19  -72.09   53.59
 -10   0  19  -14.10   47.10
  10   0 -19  -58.59   49.00
  -9   0  19   39.80   45.60
   9   0 -19   83.69   50.59
   9   0 -19  -56.69   45.80
  -8   0  19   20.20   42.30
   8   0 -19   65.79   46.90
   8   0 -19   72.39   43.20
  -7   0  19  -40.40   38.50
   7   0 -19   75.49   47.80
   7   0 -19   27.50   45.80
  -6   0  19   25.60   38.60
   6   0 -19    3.40   38.40
   6   0 -19  -48.90   41.40
  -5   0  19   -8.50   34.40
   5   0 -19   23.30   43.60
   5   0 -19  -17.30   42.60
  -4   0  19  -36.30   33.60
   4   0 -19   25.90   44.20
   4   0 -19  -25.50   40.90
  -3   0  19   29.70   35.60
   3   0 -19   26.30   42.90
   3   0 -19    3.50   42.70
  -2   0  19   81.29   37.30
   2   0 -19   12.60   40.40
   2   0 -19 -103.39   38.00
  -1   0  19  -35.00   30.90
   1   0 -19  -24.10   39.50
   1   0 -19    0.50   38.80
   0   0  19   22.70   32.40
   0   0 -19   44.60   38.90
   0   0 -19    6.90   41.50
   1   0  19   49.99   34.40
  -1   0 -19    3.50   42.40
  -1   0 -19   11.60   36.70
   2   0  19  -22.60   31.60
  -2   0 -19   11.70   43.90
  -2   0 -19   21.50   37.30
   3   0  19  -19.90   31.50
  -3   0 -19   44.90   45.90
  -3   0 -19   38.80   40.10
   4   0  19   40.70   32.40
  -4   0 -19   16.90   39.40
   5   0  19    9.60   33.70
  -5   0 -19   37.40   40.40
   6   0  19  -48.00   32.70
  -6   0 -19  -34.50   48.20
  -6   0 -19   -3.20   43.60
  -6   0 -19   53.09   41.40
   7   0  19   22.80   36.50
  -7   0 -19   36.40   55.79
  -7   0 -19   26.30   48.60
   8   0  19   19.90   38.00
  -8   0 -19  -94.59   47.80
  -8   0 -19  -31.30   50.59
   9   0  19   25.00   39.50
  -9   0 -19   55.79   59.49
  -9   0 -19  -22.10   53.49
  10   0  19  -18.60   38.50
 -10   0 -19   -5.50   61.39
 -10   0 -19   14.30   61.49
  11   0  19  -15.10   40.50
 -11   0 -19   93.99   69.29
 -11   0 -19  -26.10   66.29
  12   0  19   15.40   51.49
 -12   0 -19   66.29   76.89
 -12   0 -19  -98.09   69.09
 -11   0  20    2.50   88.29
  11   0 -20  173.08   89.59
 -10   0  20  -37.30   54.39
  10   0 -20   13.00   59.89
  -9   0  20  -35.40   47.00
   9   0 -20  -54.79   50.69
   9   0 -20   -6.60   53.99
  -8   0  20 -100.49   43.10
   8   0 -20  135.89   53.09
   8   0 -20   53.59   50.39
  -7   0  20   44.40   45.20
   7   0 -20  -37.30   44.60
   7   0 -20  -69.09   44.60
  -6   0  20    4.40   40.40
   6   0 -20  -66.79   40.60
   6   0 -20   13.00   46.80
  -5   0  20    7.50   38.00
   5   0 -20  -26.50   44.00
   5   0 -20   57.19   46.00
  -4   0  20   23.50   38.50
   4   0 -20  -45.50   40.70
   4   0 -20   60.19   46.20
  -3   0  20  -15.60   34.20
   3   0 -20  -15.50   44.00
   3   0 -20   59.19   43.30
  -2   0  20   -1.20   34.80
   2   0 -20  -31.40   41.90
   2   0 -20   30.20   42.30
  -1   0  20   19.90   35.60
   1   0 -20   15.60   42.30
   1   0 -20  -23.50   41.60
   0   0  20   53.29   35.60
   0   0 -20   27.00   40.50
   0   0 -20    8.30   45.00
   1   0  20   12.50   33.50
  -1   0 -20    6.70   40.80
  -1   0 -20  -20.00   43.40
   2   0  20   -9.40   34.00
  -2   0 -20    3.40   42.90
  -2   0 -20   -8.10   43.40
   3   0  20   -2.70   33.10
  -3   0 -20   81.09   48.80
  -3   0 -20  -32.10   37.80
   4   0  20   23.40   34.60
  -4   0 -20  -19.60   49.60
  -4   0 -20   75.09   42.90
   5   0  20   20.80   37.70
  -5   0 -20  -13.00   41.40
   6   0  20   19.30   37.10
   7   0  20   36.20   37.70
   8   0  20   48.30   41.80
   9   0  20  -27.70   39.40
  10   0  20   50.09   45.90
 -10   0 -20   62.59   72.09
 -10   0 -20   62.99   81.89
  11   0  20   -2.50   59.19
 -11   0 -20  -53.79   68.89
  -9   0  21    6.70   56.69
   9   0 -21   -8.80   63.19
   9   0 -21  -40.20   71.79
  -8   0  21  -41.10   50.09
   8   0 -21   15.00   53.69
   8   0 -21    0.10   53.89
  -7   0  21   29.10   47.90
   7   0 -21   11.70   53.39
   7   0 -21  -40.20   52.19
  -6   0  21  -39.40   41.00
   6   0 -21   90.89   56.99
   6   0 -21  -27.20   48.50
  -5   0  21   40.00   44.20
   5   0 -21   54.49   50.89
   5   0 -21   53.19   49.10
  -4   0  21    0.70   40.00
   4   0 -21  -19.10   45.80
   4   0 -21   62.59   49.70
  -3   0  21   60.29   41.20
   3   0 -21   33.50   48.60
   3   0 -21    5.50   45.00
  -2   0  21   11.70   36.60
   2   0 -21   -7.90   44.50
   2   0 -21  -13.60   45.50
  -1   0  21   -9.60   34.60
   1   0 -21   54.39   46.30
   1   0 -21   70.29   48.20
   0   0  21  -24.90   34.30
   0   0 -21  -59.19   43.50
   0   0 -21  102.19   52.09
   1   0  21  -52.09   32.90
  -1   0 -21    4.40   49.60
  -1   0 -21  -11.70   45.90
   2   0  21    7.50   35.60
  -2   0 -21   -0.10   44.20
  -2   0 -21   96.79   55.99
   3   0  21   36.60   37.00
  -3   0 -21  -34.40   48.00
  -3   0 -21   13.70   44.60
   4   0  21   -8.20   35.30
  -4   0 -21  -52.09   42.50
  -4   0 -21   36.40   52.89
   5   0  21  118.59   42.10
  -5   0 -21    1.80   55.89
  -5   0 -21  -14.80   54.79
   6   0  21   91.89   42.70
   7   0  21  -96.69   34.90
   8   0  21   59.19   46.60
   9   0  21  134.19   50.49
  -8   0  22  -41.90   73.99
   8   0 -22   44.60   71.69
   8   0 -22  -19.60   70.19
  -7   0  22   25.10   55.49
   7   0 -22   58.39   57.89
   7   0 -22  -19.30   62.19
  -6   0  22   25.20   52.39
   6   0 -22   71.99   58.29
   6   0 -22   -8.50   57.79
  -5   0  22   58.99   48.30
   5   0 -22   18.40   53.29
   5   0 -22  117.99   59.19
  -4   0  22   16.70   47.30
   4   0 -22   38.90   53.29
   4   0 -22   -3.40   55.39
  -3   0  22    5.70   43.20
   3   0 -22   33.50   52.29
   3   0 -22   36.40   54.59
  -2   0  22  -32.00   39.70
   2   0 -22  -32.50   49.00
   2   0 -22   33.60   53.19
  -1   0  22    4.40   38.50
   1   0 -22  -54.59   47.90
   1   0 -22    9.30   50.69
   0   0  22    5.90   37.10
   0   0 -22   26.40   50.79
   0   0 -22   -6.20   46.80
   1   0  22   19.10   38.50
  -1   0 -22    2.30   46.10
  -1   0 -22   43.50   53.69
   2   0  22  -47.00   35.60
  -2   0 -22   85.09   50.59
  -2   0 -22   -8.50   51.99
   3   0  22    9.40   39.20
  -3   0 -22   78.39   50.69
  -3   0 -22  -71.69   51.29
   4   0  22    0.30   37.60
  -4   0 -22  123.39   64.39
  -4   0 -22   -1.70   47.50
   5   0  22   38.40   42.50
  -5   0 -22  -23.80   60.49
   6   0  22  -11.90   42.70
  -6   0 -22   24.60   67.29
   7   0  22  -56.29   41.60
  -7   0 -22  -52.09   73.39
   8   0  22   33.00   57.29
  -6   0  23  118.79   97.09
   6   0 -23   10.00   74.19
   6   0 -23 -136.09   81.89
  -5   0  23    3.10   53.49
   5   0 -23  -47.90   63.59
   5   0 -23   18.50   59.59
  -4   0  23   39.70   52.19
   4   0 -23   36.10   59.89
   4   0 -23  -54.99   59.69
  -3   0  23  -64.99   43.90
   3   0 -23   -5.30   55.89
   3   0 -23  -53.89   59.69
  -2   0  23   16.00   44.60
   2   0 -23  -19.60   55.79
   2   0 -23   44.60   59.39
  -1   0  23   50.99   45.90
   1   0 -23   78.09   60.79
   1   0 -23   25.40   61.09
   0   0  23  -70.99   39.90
   0   0 -23  -72.69   50.09
   0   0 -23    3.80   57.49
   1   0  23  -51.89   39.20
  -1   0 -23   39.00   59.29
  -1   0 -23   -2.00   54.39
   2   0  23  -36.40   40.40
  -2   0 -23   -0.40   62.49
  -2   0 -23   -3.00   54.99
   3   0  23   36.00   41.40
  -3   0 -23  -76.79   62.19
  -3   0 -23 -152.68   50.09
   4   0  23  -41.00   41.30
  -4   0 -23   86.89   70.99
   5   0  23   68.49   47.00
  -5   0 -23    5.20   71.89
   6   0  23   17.20   63.99
  -6   0 -23 -137.89   89.19
  -2   0  24  -95.29   74.19
   2   0 -24   57.49   85.29
   2   0 -24    5.90   79.19
  -1   0  24  -32.50   61.09
   1   0 -24  -81.39   72.69
   1   0 -24  -51.79   64.59
   0   0  24  -91.09   50.59
   0   0 -24   13.40   76.59
   0   0 -24  179.28   67.19
   1   0  24   42.50   60.29
  -1   0 -24  -42.50   60.29
  -1   0 -24  -88.99   71.79
   2   0  24  -54.19   71.89
  -2   0 -24   65.79   93.69
  -2   0 -24  -96.79   63.99
  -2   1 -24   41.90   76.29
  -2   1 -24   11.80   88.89
  -1   1 -24   48.90   69.19
  -1   1 -24  -97.19   67.69
   1  -1  24  -84.09   52.69
   0   1 -24  127.59   70.89
   0   1 -24  -36.30   70.69
   0  -1  24  -17.00   54.69
   1   1 -24   29.80   73.79
   1   1 -24   95.09   76.39
  -1  -1  24   34.80   71.19
   2   1 -24  -12.30   95.59
   2   1 -24   -7.60   85.69
  -2  -1  24    1.50   82.49
  -6   1 -23  -77.09  101.89
   6  -1  23 -121.79   62.09
  -5   1 -23   74.89   73.79
   5  -1  23  -83.59   39.50
  -4   1 -23   66.89   75.79
   4  -1  23   35.10   44.30
  -3   1 -23  -48.30   59.59
  -3   1 -23   -6.40   55.49
   3  -1  23   40.90   44.10
  -2   1 -23  -23.90   61.19
  -2   1 -23  -17.70   50.29
   2  -1  23  -46.90   38.60
  -1   1 -23  -43.90   49.40
  -1   1 -23   17.30   62.59
   1  -1  23   39.90   44.70
   0   1 -23   59.79   61.39
   0   1 -23    8.30   53.09
   0  -1  23  -23.30   42.00
   1   1 -23  -58.29   52.79
   1   1 -23   39.50   57.59
  -1  -1  23  -23.50   43.20
   2   1 -23   -4.30   57.39
   2   1 -23  -58.99   53.69
  -2  -1  23   44.60   48.30
   3   1 -23  -25.80   57.29
   3   1 -23   -6.90   58.19
  -3  -1  23   33.90   48.50
   4   1 -23  -70.29   54.79
   4   1 -23  110.89   65.99
  -4  -1  23  -22.70   49.20
   5   1 -23    0.60   57.89
   5   1 -23   78.69   67.29
  -5  -1  23  -13.70   51.09
   6   1 -23 -138.39   97.59
   6   1 -23  157.38   85.59
   8  -1  22  136.39   61.09
   7  -1  22   20.40   42.30
   6  -1  22   45.50   46.30
  -5   1 -22   62.69   73.49
   5  -1  22   27.70   48.60
  -4   1 -22   92.89   63.79
  -4   1 -22  -30.40   45.50
   4  -1  22   93.39   43.40
  -3   1 -22  -61.59   53.89
  -3   1 -22   23.30   45.30
   3  -1  22   40.70   39.60
  -2   1 -22  -25.20   45.80
  -2   1 -22   -1.10   51.29
   2  -1  22   -0.70   36.70
  -1   1 -22  -61.69   46.00
  -1   1 -22    8.30   49.90
   1  -1  22   -5.10   37.40
   0   1 -22   32.50   52.89
   0   1 -22  -23.80   46.60
   0  -1  22   84.19   41.70
   1   1 -22   21.90   50.99
   1   1 -22    7.10   51.49
  -1  -1  22  -38.40   36.10
   2   1 -22   12.10   50.89
   2   1 -22  122.99   56.89
  -2  -1  22  -13.70   39.30
   3   1 -22  -74.59   47.20
   3   1 -22  -15.50   49.20
  -3  -1  22  -52.19   40.10
   4   1 -22   72.39   53.99
   4   1 -22  -23.90   50.99
  -4  -1  22  -26.50   43.50
   5   1 -22   85.19   55.99
   5   1 -22  -23.10   51.39
  -5  -1  22  -30.00   45.60
   6   1 -22   26.70   59.59
  -6  -1  22    7.10   49.20
   7   1 -22   25.40   58.79
   7   1 -22  176.78   71.19
  -7  -1  22  -35.70   51.59
   8   1 -22  -12.20   61.29
   8   1 -22 -113.29   72.79
  -8  -1  22  -55.49   77.49
  -9   1 -21    7.10   74.69
   9  -1  21  -20.60   44.10
  -8   1 -21   36.10   65.99
   8  -1  21   10.80   43.10
   7  -1  21  -27.40   39.00
   6  -1  21   83.39   42.10
  -5   1 -21    0.00   59.49
   5  -1  21   -6.10   36.00
  -4   1 -21   29.00   43.80
  -4   1 -21   18.30   56.29
   4  -1  21    1.40   35.10
  -3   1 -21    7.50   49.20
  -3   1 -21   20.70   44.40
   3  -1  21   45.60   39.20
  -2   1 -21   38.00   50.99
  -2   1 -21  -23.60   41.50
   2  -1  21   16.90   34.90
  -1   1 -21  -15.20   41.50
  -1   1 -21   16.60   50.09
   1  -1  21  -20.30   34.80
   0   1 -21  -35.60   40.50
   0   1 -21   40.20   48.30
   0  -1  21  -33.00   34.40
   1   1 -21  -33.20   43.30
   1   1 -21   46.20   47.20
  -1  -1  21  -44.50   32.80
   2   1 -21   -9.40   44.60
   2   1 -21  -16.40   41.30
  -2  -1  21  -77.49   32.70
   3   1 -21    2.10   47.90
   3   1 -21   94.49   49.50
  -3  -1  21   15.00   38.50
   4   1 -21  -14.20   47.30
   4   1 -21  -29.70   49.40
  -4  -1  21    9.20   39.10
   5   1 -21   62.89   53.09
   5   1 -21  -15.90   47.10
  -5  -1  21    1.90   43.10
   6   1 -21  -50.49   47.00
   6   1 -21  -86.89   45.50
  -6  -1  21   -9.10   44.50
   7   1 -21   -0.40   55.99
   7   1 -21   97.99   54.09
  -7  -1  21  -78.89   43.20
   8   1 -21 -105.69   47.60
   8   1 -21   -4.20   53.49
  -8  -1  21  -57.69   48.50
   9   1 -21   27.30   64.49
  -9  -1  21    0.30   56.29
 -11   1 -20  134.49  110.09
 -11   1 -20  -41.60  100.59
 -10   1 -20   61.19   78.69
  10  -1  20   44.30   46.10
  -9   1 -20   -5.90   68.69
   9  -1  20   -2.50   42.00
  -8   1 -20    6.20   65.99
   8  -1  20   32.10   40.50
  -7   1 -20  -46.70   54.59
   7  -1  20  -49.00   34.00
  -6   1 -20   10.20   54.99
   6  -1  20  -41.10   33.60
  -5   1 -20   84.59   56.29
  -5   1 -20  -20.60   38.60
   5  -1  20  -26.80   34.00
  -4   1 -20  -18.90   39.20
   4  -1  20   51.39   34.40
  -3   1 -20  -70.09   33.60
  -3   1 -20   67.19   50.89
   3  -1  20   38.90   35.60
  -2   1 -20  -22.50   40.00
  -2   1 -20    6.60   44.60
   2  -1  20  -40.00   31.40
  -1   1 -20   45.30   42.20
  -1   1 -20   24.60   44.50
   1  -1  20  -32.70   31.70
   0   1 -20   80.79   44.40
   0   1 -20   56.89   46.10
   0  -1  20  -36.50   31.60
   1   1 -20   -3.20   42.80
   1   1 -20  -31.80   40.00
  -1  -1  20   16.60   34.50
   2   1 -20  -11.40   41.80
   2   1 -20  -10.10   40.50
  -2  -1  20  -48.40   34.10
   3   1 -20  -69.79   40.90
   3   1 -20   51.79   45.70
  -3  -1  20    0.00   36.40
   4   1 -20   74.19   47.50
   4   1 -20   10.30   44.40
  -4  -1  20   77.29   41.20
   5   1 -20   28.60   45.80
   5   1 -20  -70.09   41.60
  -5  -1  20  -15.50   36.50
   6   1 -20  -14.70   45.80
   6   1 -20   40.90   49.30
  -6  -1  20   13.90   41.10
   7   1 -20   62.29   49.60
   7   1 -20  -24.30   46.20
  -7  -1  20  108.09   49.10
   8   1 -20  -35.30   48.10
   8   1 -20   65.29   52.59
  -8  -1  20   15.60   47.30
   9   1 -20    1.70   55.09
   9   1 -20   45.00   56.19
  -9  -1  20  -50.29   46.70
  10   1 -20   31.60   61.39
 -10  -1  20 -128.39   47.90
  11   1 -20  156.88   91.19
 -11  -1  20  -52.69   85.39
 -12   1 -19   35.70   78.89
 -12   1 -19 -115.79   66.99
 -11   1 -19   49.80   64.59
 -11   1 -19  -82.99   64.39
  11  -1  19  -30.40   39.80
 -10   1 -19  -64.09   53.19
 -10   1 -19  -77.09   63.39
  10  -1  19   17.50   40.10
  -9   1 -19 -150.78   48.40
  -9   1 -19  -57.99   49.20
   9  -1  19    3.40   38.80
  -8   1 -19  -72.59   50.69
  -8   1 -19  -43.20   48.60
   8  -1  19   62.09   38.60
  -7   1 -19  -57.89   43.70
  -7   1 -19   23.80   56.29
   7  -1  19   -9.60   34.40
  -6   1 -19  -50.29   37.30
  -6   1 -19    3.30   50.79
   6  -1  19   20.10   35.80
  -5   1 -19  -46.50   45.40
  -5   1 -19  -32.00   36.70
   5  -1  19   32.00   33.70
  -4   1 -19    7.80   39.20
  -4   1 -19   60.09   48.20
   4  -1  19  -42.50   30.30
  -3   1 -19   10.90   38.10
   3  -1  19  -26.70   29.50
  -2   1 -19   39.80   37.80
  -2   1 -19   89.29   48.50
   2  -1  19   46.30   34.40
  -1   1 -19    2.40   41.30
  -1   1 -19  -20.20   37.10
   1  -1  19   -5.90   32.20
   0   1 -19    2.60   40.40
   0   1 -19   13.90   36.80
   0  -1  19   15.50   32.00
   1   1 -19   33.00   41.10
   1   1 -19    5.90   41.10
  -1  -1  19  -14.50   30.50
   2   1 -19  -25.10   39.70
   2   1 -19   21.20   38.40
  -2  -1  19    6.40   34.60
   3   1 -19   -9.40   41.00
   3   1 -19  -21.00   37.90
  -3  -1  19   24.00   35.60
   4   1 -19   32.00   41.70
   4   1 -19    1.50   41.10
  -4  -1  19   23.20   35.40
   5   1 -19   78.19   44.70
   5   1 -19  -47.70   37.90
  -5  -1  19   -7.40   36.40
   6   1 -19  -76.39   40.60
   6   1 -19   39.80   45.70
  -6  -1  19  -31.00   37.00
   7   1 -19   -4.10   44.10
   7   1 -19   48.50   41.90
  -7  -1  19  -62.09   36.30
   8   1 -19  -34.70   43.70
   8   1 -19   15.20   46.60
  -8  -1  19   47.90   42.90
   9   1 -19   -1.90   45.50
   9   1 -19   85.79   53.29
  -9  -1  19  -46.00   41.80
  10   1 -19   69.79   56.09
 -10  -1  19  123.29   56.29
  11   1 -19   18.60   55.99
  11   1 -19   41.20   70.79
 -11  -1  19   75.49   55.69
  12   1 -19  -22.90   68.99
  12   1 -19 -127.09   76.29
 -12  -1  19  139.59   74.79
 -13   1 -18   36.00   74.59
 -13   1 -18   20.40   76.49
 -12   1 -18    4.70   70.79
 -12   1 -18   28.60   63.89
  12  -1  18   18.60   55.09
 -11   1 -18  -13.70   59.79
 -11   1 -18  -18.40   60.39
  11  -1  18   22.10   38.60
 -10   1 -18  -11.80   54.39
 -10   1 -18  -31.30   55.69
  10  -1  18  -26.20   35.60
  -9   1 -18   17.20   53.69
  -9   1 -18   55.09   52.29
   9  -1  18   35.60   38.50
  -8   1 -18   60.09   51.99
  -8   1 -18   59.09   54.19
   8  -1  18  -37.50   32.20
  -7   1 -18   68.89   47.20
  -7   1 -18  -37.40   45.50
   7  -1  18  -11.80   32.20
  -6   1 -18   46.20   35.40
  -6   1 -18   75.49   51.29
  -6   1 -18  -11.30   41.80
   6  -1  18  -43.70   31.80
  -5   1 -18  -65.09   41.90
  -5   1 -18   66.49   36.20
  -5   1 -18   51.69   39.90
   5  -1  18   19.70   32.40
  -4   1 -18   -8.30   33.20
  -4   1 -18   22.00   47.50
  -4   1 -18   16.70   33.20
   4  -1  18   27.80   32.40
  -3   1 -18   37.70   34.70
  -3   1 -18   12.90   47.70
   3  -1  18   12.20   30.10
  -2   1 -18   42.60   38.70
   2  -1  18   55.39   32.70
  -1   1 -18   18.40   35.60
  -1   1 -18  -27.50   36.10
   1  -1  18    6.60   30.20
   0   1 -18  -41.30   35.90
   0   1 -18   -3.80   34.90
   0  -1  18   14.00   32.10
   1   1 -18  -33.80   34.10
   1   1 -18   38.30   41.40
  -1  -1  18   23.20   32.60
   2   1 -18   79.29   42.40
   2   1 -18   73.99   41.80
  -2  -1  18   97.99   35.70
   3   1 -18   31.00   40.80
   3   1 -18   14.00   38.20
  -3  -1  18   34.40   34.00
   4   1 -18   26.90   39.70
   4   1 -18    9.60   39.40
  -4  -1  18   32.80   36.60
   5   1 -18   54.49   41.50
   5   1 -18  -54.49   39.40
  -5  -1  18  -19.30   34.60
   6   1 -18   28.80   41.90
   6   1 -18   47.20   39.30
  -6  -1  18  -20.70   36.10
   7   1 -18  -23.00   39.10
   7   1 -18   20.10   43.10
  -7  -1  18   12.30   36.70
   8   1 -18  -60.89   38.80
   8   1 -18   65.49   44.70
  -8  -1  18  -30.30   37.40
   9   1 -18 -102.19   40.00
   9   1 -18  -37.10   50.19
   9   1 -18   46.50   48.10
  -9  -1  18    2.80   40.00
  10   1 -18  -92.49   51.39
  10   1 -18   32.30   47.00
 -10  -1  18  -30.60   40.80
  11   1 -18  164.98   58.49
  11   1 -18   68.59   63.89
 -11  -1  18   17.40   49.30
  12   1 -18  -18.70   66.09
  12   1 -18   45.40   56.39
  13   1 -18  -12.90   77.49
  13   1 -18 -138.89   66.39
 -14   1 -17  -45.00   78.09
 -14   1 -17  155.68   92.79
 -13   1 -17  -62.29   67.19
 -13   1 -17   17.70   71.49
  13  -1  17  -47.80   56.69
 -12   1 -17   23.20   62.49
 -12   1 -17   77.79   66.99
  12  -1  17   46.00   38.30
 -11   1 -17   19.10   60.89
 -11   1 -17  -60.99   52.59
  11  -1  17   51.79   37.10
 -10   1 -17  -54.89   52.69
 -10   1 -17  -17.80   52.29
  10  -1  17   14.40   36.80
  -9   1 -17  -57.49   47.80
  -9   1 -17  -39.60   48.80
   9  -1  17   10.60   35.00
  -8   1 -17   34.10   45.60
  -8   1 -17  -51.69   45.00
   8  -1  17   17.40   33.50
  -7   1 -17   37.20   43.60
  -7   1 -17  -70.99   45.10
  -7   1 -17  -28.70   33.00
   7  -1  17  -10.90   30.60
  -6   1 -17  -36.40   39.90
  -6   1 -17  -54.79   29.80
  -6   1 -17   25.90   43.60
   6  -1  17   60.49   33.80
  -5   1 -17  -28.40   35.20
  -5   1 -17  -12.30   31.20
  -5   1 -17  -43.90   42.60
   5  -1  17   10.90   31.40
  -4   1 -17   -2.10   32.60
  -4   1 -17   18.20   33.40
  -4   1 -17   -2.60   42.50
   4  -1  17   30.20   31.00
  -3   1 -17    1.60   41.10
  -3   1 -17  -70.89   25.90
  -3   1 -17  -58.09   31.40
   3  -1  17   23.80   29.20
  -2   1 -17   25.60   32.60
  -2   1 -17   38.10   26.30
  -2   1 -17  -51.89   38.20
   2  -1  17   12.50   20.30
   2  -1  17   52.49   31.60
  -1   1 -17   60.99   37.30
   1  -1  17   78.39   32.30
   0   1 -17   23.70   34.80
   0   1 -17  -11.90   35.50
   0  -1  17  -23.70   27.60
   1   1 -17  162.98   44.00
   1   1 -17   84.09   39.30
  -1  -1  17  119.99   37.20
   2   1 -17    1.60   34.90
   2   1 -17    7.30   37.10
  -2  -1  17   32.00   32.00
   3   1 -17    1.10   34.60
   3   1 -17    7.00   36.50
  -3  -1  17   76.49   33.70
   4   1 -17   -8.60   34.60
   4   1 -17    2.20   37.70
  -4  -1  17   38.60   34.10
   5   1 -17  -13.80   35.80
   5   1 -17  -26.50   36.40
  -5  -1  17  -45.30   31.50
   6   1 -17  -25.40   34.90
   6   1 -17   17.70   38.30
  -6  -1  17   -4.20   32.30
   7   1 -17   46.60   40.70
   7   1 -17   40.10   41.20
  -7  -1  17  -23.60   35.30
   8   1 -17   26.80   48.40
   8   1 -17  -52.39   36.20
   8   1 -17   58.09   41.50
  -8  -1  17   45.60   37.70
   9   1 -17   34.70   42.00
   9   1 -17   97.29   46.80
   9   1 -17   25.30   52.49
  -9  -1  17  -97.09   33.80
  10   1 -17   69.69   45.20
  10   1 -17    1.10   42.20
  10   1 -17   -1.70   48.80
  11   1 -17  -52.49   51.79
  11   1 -17   -3.10   45.10
  12   1 -17   16.50   50.09
  12   1 -17   24.90   61.89
  13   1 -17  -36.90   64.79
  13   1 -17   13.00   50.19
  14   1 -17   34.40   97.49
  14   1 -17    8.70   90.79
 -14   1 -16  -45.10   65.69
 -14   1 -16   31.60   76.49
  14  -1  16    3.60   58.99
 -13   1 -16  -25.70   58.59
 -13   1 -16  -17.20   67.19
  13  -1  16  -37.40   52.19
  13  -1  16  -29.60   36.20
 -12   1 -16   46.70   66.19
 -12   1 -16   99.79   62.79
  12  -1  16    9.00   48.30
  12  -1  16  -51.29   33.10
 -11   1 -16  109.19   59.69
 -11   1 -16   78.59   61.99
  11  -1  16   48.00   35.90
 -10   1 -16   61.89   54.49
 -10   1 -16   45.30   49.60
  10  -1  16   53.09   37.10
  -9   1 -16   13.40   47.10
  -9   1 -16   24.30   52.49
   9  -1  16   12.80   32.70
  -8   1 -16   27.90   48.70
  -8   1 -16  -32.70   45.50
   8  -1  16  -73.89   27.90
  -7   1 -16   -6.10   29.90
  -7   1 -16   58.79   44.90
  -7   1 -16   94.89   47.90
   7  -1  16   40.40   32.40
  -6   1 -16   21.50   30.50
  -6   1 -16  103.39   41.50
  -6   1 -16  -37.10   41.60
   6  -1  16   -0.30   30.30
  -5   1 -16   -0.70   41.60
  -5   1 -16   12.80   34.70
  -5   1 -16   83.09   33.20
   5  -1  16  -29.90   28.70
   5  -1  16   23.00   26.90
  -4   1 -16  -46.10   27.90
  -4   1 -16   53.49   41.80
  -4   1 -16  -57.19   29.70
   4  -1  16   32.50   29.70
   4  -1  16   -5.60   17.10
  -3   1 -16   18.80   28.80
  -3   1 -16    4.80   30.00
  -3   1 -16   76.49   43.90
   3  -1  16   -0.20   26.10
   3  -1  16  -14.40   17.50
  -2   1 -16  -28.40   37.10
  -2   1 -16   39.80   33.20
  -2   1 -16   29.90   25.80
   2  -1  16   -7.90   27.10
   2  -1  16   48.70   20.60
  -1   1 -16    6.20   37.00
  -1   1 -16  -17.70   29.40
  -1   1 -16  -12.60   22.30
   1  -1  16    8.00   27.80
   0   1 -16   30.90   33.80
   0   1 -16   49.80   37.30
   0  -1  16   39.60   29.90
   1   1 -16    3.90   29.60
   1   1 -16   -4.10   33.80
  -1  -1  16  -35.60   27.20
   2   1 -16   15.50   35.10
   2   1 -16   44.10   35.60
  -2  -1  16   18.70   30.40
   3   1 -16   26.00   35.30
   3   1 -16   15.30   34.60
  -3  -1  16   16.40   29.90
   4   1 -16   13.10   35.30
   4   1 -16   31.50   38.00
  -4  -1  16   -5.30   31.40
   5   1 -16    8.80   35.00
   5   1 -16   29.20   35.00
  -5  -1  16    4.10   31.40
   6   1 -16   32.10   37.10
   6   1 -16  -29.80   34.30
  -6  -1  16   22.30   34.30
   7   1 -16  133.59   48.70
   7   1 -16   -5.50   36.00
   7   1 -16   26.10   37.70
  -7  -1  16   24.90   36.40
   8   1 -16  -58.29   42.10
   8   1 -16   20.10   38.20
   8   1 -16   -5.00   37.50
   9   1 -16   52.19   49.00
   9   1 -16  -49.40   35.70
   9   1 -16  -15.60   38.40
  10   1 -16  -46.00   38.70
  10   1 -16   45.00   42.40
  10   1 -16   66.89   50.39
  11   1 -16  -38.20   39.80
  11   1 -16  -70.09   49.00
  12   1 -16  -65.39   40.80
  12   1 -16    0.40   54.59
  13   1 -16   25.80   59.99
  13   1 -16  -72.39   45.00
  14   1 -16 -123.09   63.99
  14   1 -16   16.00   54.39
 -15   1 -15   41.60   81.89
 -15   1 -15  -32.90   60.69
  15  -1  15  -74.49   55.19
 -14   1 -15  -37.40   71.29
 -14   1 -15   50.09   61.79
  14  -1  15   73.79   59.39
  14  -1  15   42.20   55.69
 -13   1 -15  -18.30   56.99
 -13   1 -15  -33.40   59.29
  13  -1  15   -7.50   34.90
  13  -1  15   32.60   52.09
 -12   1 -15   -4.60   50.79
 -12   1 -15   11.20   62.59
  12  -1  15   67.39   35.00
  12  -1  15  -10.70   45.00
 -11   1 -15 -101.39   45.20
 -11   1 -15   57.29   59.19
  11  -1  15   30.00   34.40
 -10   1 -15 -113.99   38.80
 -10   1 -15   59.19   56.29
  10  -1  15   39.10   32.40
  -9   1 -15   48.10   46.50
  -9   1 -15  -46.50   46.00
   9  -1  15  -30.30   30.90
  -8   1 -15    3.00   47.70
  -8   1 -15   46.40   46.60
   8  -1  15   17.30   31.40
  -7   1 -15   52.99   42.60
  -7   1 -15    3.30   26.50
  -7   1 -15   -5.70   43.10
   7  -1  15  -17.00   28.20
   7  -1  15   -9.50   18.00
  -6   1 -15   71.29   43.80
  -6   1 -15    9.80   37.90
  -6   1 -15   28.80   28.40
   6  -1  15  -10.00   27.10
   6  -1  15   20.60   18.30
  -5   1 -15   33.70   43.10
  -5   1 -15   20.20   36.30
  -5   1 -15   -2.00   27.60
   5  -1  15   45.20   30.10
   5  -1  15   28.80   18.10
  -4   1 -15   23.20   30.50
  -4   1 -15   20.10   32.70
  -4   1 -15   46.00   41.90
   4  -1  15   48.90   18.10
   4  -1  15   26.20   27.80
  -3   1 -15  -51.29   26.40
  -3   1 -15  -26.90   28.60
  -3   1 -15   26.30   42.40
   3  -1  15   -7.80   25.60
   3  -1  15   -5.40   17.10
  -2   1 -15   43.60   29.70
  -2   1 -15   20.80   24.30
  -2   1 -15   21.00   37.60
   2  -1  15   13.60   19.90
   2  -1  15   -5.80   26.10
  -1   1 -15   62.49   33.80
  -1   1 -15   72.99   23.50
  -1   1 -15   19.30   39.30
   1  -1  15   55.79   28.30
   1  -1  15   30.30   18.90
   0   1 -15  124.29   36.50
   0  -1  15  174.08   37.30
   1   1 -15  -26.10   30.90
   1   1 -15  -11.60   30.70
  -1  -1  15   44.60   28.90
   2   1 -15    2.10   32.50
   2   1 -15  -19.50   30.60
  -2  -1  15   19.20   28.40
   3   1 -15   20.20   32.30
   3   1 -15   -3.80   32.60
  -3  -1  15   25.20   29.50
   4   1 -15   37.00   34.70
   4   1 -15   52.49   34.50
  -4  -1  15   18.90   30.50
   5   1 -15  -84.59   30.00
   5   1 -15   19.70   33.90
  -5  -1  15  -26.30   28.80
   6   1 -15  -24.50   39.40
   6   1 -15   25.80   35.60
   6   1 -15  -33.40   33.50
  -6  -1  15  -55.49   30.00
   7   1 -15   38.60   36.50
   7   1 -15   -5.60   39.90
   7   1 -15   22.30   34.60
   8   1 -15    2.90   32.20
   8   1 -15   32.60   44.40
   8   1 -15    0.60   35.90
   9   1 -15   29.70   38.40
   9   1 -15   33.40   43.20
   9   1 -15   32.90   37.90
  10   1 -15    6.80   36.30
  10   1 -15   27.50   40.50
  10   1 -15    1.10   46.10
  11   1 -15   78.99   50.09
  11   1 -15   74.29   42.40
  11   1 -15   42.50   53.79
  12   1 -15   22.30   38.80
  12   1 -15  -16.10   49.30
  13   1 -15  -43.90   54.99
  13   1 -15  -69.39   40.30
  14   1 -15  -26.00   59.19
  14   1 -15   54.09   48.80
  15   1 -15  116.49   60.19
  15   1 -15  -15.50   72.99
 -16   1 -14    4.80   78.19
 -16   1 -14 -192.98   85.49
 -15   1 -14  -25.40   64.89
 -15   1 -14   29.00   76.99
  15  -1  14   20.60   52.59
 -14   1 -14  -29.90   57.99
 -14   1 -14   79.19   72.69
  14  -1  14  -45.80   33.80
  14  -1  14  -42.90   48.30
 -13   1 -14  -50.89   47.80
 -13   1 -14   42.60   56.59
  13  -1  14   -8.70   32.80
  13  -1  14   43.60   47.50
 -12   1 -14   -2.90   47.10
 -12   1 -14  -28.10   58.89
  12  -1  14  -32.80   40.40
  12  -1  14   35.80   31.80
 -11   1 -14  -85.89   43.10
 -11   1 -14   -9.20   53.79
  11  -1  14   -7.60   30.30
 -10   1 -14   34.10   52.49
 -10   1 -14   26.90   47.90
  10  -1  14  -20.90   27.30
  10  -1  14   46.20   30.80
  -9   1 -14  -17.50   43.30
  -9   1 -14  -66.29   47.30
   9  -1  14  -16.00   30.00
   9  -1  14   -9.00   21.80
  -8   1 -14   11.90   43.30
  -8   1 -14    0.90   23.30
  -8   1 -14  -24.90   43.40
   8  -1  14   34.40   20.70
   8  -1  14   25.10   29.50
  -7   1 -14   30.80   42.50
  -7   1 -14   38.10   25.70
  -7   1 -14  -18.30   38.50
   7  -1  14   40.40   28.80
   7  -1  14   19.20   19.50
  -6   1 -14   16.70   38.70
  -6   1 -14   49.99   41.30
  -6   1 -14   47.50   26.90
   6  -1  14    9.60   28.40
   6  -1  14   14.50   19.30
  -5   1 -14   75.39   37.30
  -5   1 -14    7.00   37.60
  -5   1 -14  116.09   31.10
   5  -1  14   46.20   19.80
   5  -1  14   45.50   29.00
  -4   1 -14   15.30   26.80
  -4   1 -14  -50.89   35.40
  -4   1 -14   49.60   31.90
   4  -1  14   96.79   29.10
   4  -1  14   43.20   18.00
  -3   1 -14  -11.10   25.20
  -3   1 -14   -0.60   34.10
  -3   1 -14    4.10   27.60
   3  -1  14   14.50   17.10
   3  -1  14  -52.79   22.80
  -2   1 -14    0.40   26.90
  -2   1 -14   21.10   24.30
  -2   1 -14   64.39   39.70
   2  -1  14   16.60   25.50
   2  -1  14   -0.40   18.10
  -1   1 -14   79.19   38.20
  -1   1 -14   12.80   21.20
  -1   1 -14    8.20   27.20
   1  -1  14   16.20   25.30
   1  -1  14   26.70   16.40
   0   1 -14    4.00   28.00
   0   1 -14  -22.60   31.50
   0  -1  14   -4.70   13.20
   0  -1  14   -4.20   24.70
   1   1 -14   -6.20   30.10
   1   1 -14    8.30   25.90
  -1  -1  14   -0.30   25.30
   2   1 -14    0.70   28.90
   2   1 -14   45.40   31.40
  -2  -1  14    6.40   26.00
   3   1 -14   24.00   31.50
   3   1 -14    0.60   29.60
  -3  -1  14    4.40   26.50
   4   1 -14  -28.80   25.90
   4   1 -14  -26.60   31.00
  -4  -1  14   62.19   30.50
   5   1 -14   10.80   37.40
   5   1 -14   88.39   34.40
   5   1 -14   74.79   36.30
  -5  -1  14   55.69   32.10
   6   1 -14   59.09   33.80
   6   1 -14    0.80   32.10
   6   1 -14   11.30   37.90
   7   1 -14   16.50   38.80
   7   1 -14   16.30   33.30
   7   1 -14   67.59   32.50
   8   1 -14   10.70   38.60
   8   1 -14   20.10   31.40
   8   1 -14   21.50   34.40
   9   1 -14   87.89   38.70
   9   1 -14   31.40   43.60
   9   1 -14   27.60   35.60
  10   1 -14    4.70   45.70
  10   1 -14    1.50   34.70
  10   1 -14   59.19   40.00
  11   1 -14  -19.30   45.70
  11   1 -14    9.90   35.80
  11   1 -14  -17.90   36.40
  12   1 -14  -14.30   38.00
  12   1 -14   32.80   50.09
  13   1 -14  -67.19   37.00
  13   1 -14  116.09   55.99
  14   1 -14   -7.40   41.50
  14   1 -14  -31.00   55.99
  15   1 -14  -37.50   62.29
  15   1 -14  -26.90   46.00
  16   1 -14  -41.40   74.39
  16   1 -14   31.70   62.49
 -16   1 -13   78.89   83.39
 -16   1 -13 -132.09   56.19
  16  -1  13  -39.80   56.29
 -15   1 -13   26.70   74.29
 -15   1 -13  101.79   59.39
  15  -1  13  -36.70   44.70
  15  -1  13   25.20   52.59
 -14   1 -13   -5.20   57.49
 -14   1 -13  167.68   57.29
  14  -1  13    8.80   34.30
  14  -1  13   -6.20   43.10
 -13   1 -13  116.99   53.99
 -13   1 -13   49.10   61.79
  13  -1  13  -29.00   40.90
  13  -1  13   26.10   32.60
 -12   1 -13  -16.90   52.69
 -12   1 -13  -92.99   43.40
  12  -1  13  -24.10   31.50
  12  -1  13  -31.90   38.90
 -11   1 -13   30.70   53.29
 -11   1 -13    5.80   45.20
  11  -1  13   24.90   30.40
  11  -1  13   43.50   28.80
 -10   1 -13   -1.20   44.20
 -10   1 -13  -28.90   49.50
  10  -1  13   13.20   28.30
  10  -1  13   30.40   25.30
  -9   1 -13   12.30   42.80
  -9   1 -13   85.29   51.39
   9  -1  13   -8.00   28.10
   9  -1  13    3.20   23.10
  -8   1 -13   27.70   21.80
  -8   1 -13   53.19   42.80
  -8   1 -13   81.69   40.70
   8  -1  13   23.00   28.50
   8  -1  13   -1.30   20.20
  -7   1 -13   10.20   41.00
  -7   1 -13   59.79   40.70
  -7   1 -13   32.90   24.00
   7  -1  13   25.20   19.40
   7  -1  13   44.80   28.70
  -6   1 -13    7.90   23.30
  -6   1 -13  -11.00   37.30
  -6   1 -13   37.10   37.80
   6  -1  13   31.50   27.50
   6  -1  13   21.40   18.50
  -5   1 -13   57.39   27.00
  -5   1 -13    8.90   35.40
  -5   1 -13   42.70   35.60
   5  -1  13   73.49   28.10
   5  -1  13   32.90   18.50
  -4   1 -13   17.60   36.20
  -4   1 -13   16.50   25.20
  -4   1 -13  -48.80   27.30
   4  -1  13    8.30   16.90
   4  -1  13    0.80   23.20
  -3   1 -13   21.40   25.80
  -3   1 -13   15.50   25.60
  -3   1 -13   42.80   35.90
   3  -1  13  -18.70   22.20
   3  -1  13  -19.20   15.50
  -2   1 -13   14.20   32.90
  -2   1 -13    4.30   25.90
  -2   1 -13   31.40   23.80
   2  -1  13   18.00   22.70
   2  -1  13   -2.20   17.90
  -1   1 -13  -32.60   23.60
  -1   1 -13   18.20   31.90
  -1   1 -13   -3.10   18.50
   1  -1  13    0.20   22.70
   1  -1  13   41.10   16.30
   0   1 -13    2.00   32.60
   0   1 -13   36.20   18.00
   0   1 -13  -15.00   24.60
   0  -1  13  -10.60   22.70
   0  -1  13   13.00   13.30
   1   1 -13  -25.80   25.00
   1   1 -13    4.10   29.20
  -1  -1  13    4.20   24.00
   2   1 -13  -11.00   25.90
   2   1 -13  -22.70   27.10
  -2  -1  13    9.50   25.70
   3   1 -13    4.20   27.60
   3   1 -13  -16.80   26.60
  -3  -1  13   -5.40   24.40
   4   1 -13  -21.70   32.30
   4   1 -13  -28.80   26.70
   4   1 -13   13.80   29.50
  -4  -1  13    7.60   27.10
   5   1 -13   97.49   33.10
   5   1 -13   56.89   35.70
   5   1 -13   11.20   30.30
   6   1 -13   63.19   31.70
   6   1 -13   -3.30   27.60
   6   1 -13   10.20   34.40
   7   1 -13   76.69   33.50
   7   1 -13   68.29   40.90
   7   1 -13   24.80   32.40
   8   1 -13   26.50   31.80
   8   1 -13  -29.80   27.50
   8   1 -13   -4.10   39.30
   9   1 -13    6.30   41.70
   9   1 -13    8.80   32.80
   9   1 -13   13.40   31.50
  10   1 -13  -10.30   42.20
  10   1 -13  -27.30   34.00
  10   1 -13  -34.20   31.60
  11   1 -13    9.10   34.10
  11   1 -13  -53.99   39.70
  11   1 -13  -39.20   32.50
  12   1 -13   97.99   50.69
  12   1 -13  -30.20   36.60
  13   1 -13   28.00   40.60
  13   1 -13  -10.50   48.80
  14   1 -13   78.59   55.19
  14   1 -13   56.39   42.40
  15   1 -13  -42.60   56.89
  15   1 -13   25.10   43.20
  16   1 -13  118.49   71.19
  16   1 -13   18.20   47.40
 -17   1 -12 -128.99   94.99
 -17   1 -12   10.90   65.79
 -16   1 -12  114.99   77.49
 -16   1 -12   26.10   58.09
  16  -1  12   18.20   43.30
  16  -1  12   82.49   54.89
 -15   1 -12  -42.40   62.49
 -15   1 -12  -40.10   48.90
  15  -1  12   90.79   45.00
  15  -1  12  -68.79   47.10
 -14   1 -12   -0.50   63.19
 -14   1 -12   51.29   52.29
  14  -1  12  -47.10   31.10
  14  -1  12   -4.90   44.20
 -13   1 -12   54.49   50.79
 -13   1 -12   82.19   60.29
  13  -1  12   27.40   39.20
  13  -1  12  -15.30   29.70
 -12   1 -12   31.50   44.50
 -12   1 -12  -61.49   49.30
  12  -1  12   30.20   40.80
  12  -1  12   27.20   31.90
 -11   1 -12    2.10   43.10
 -11   1 -12   37.20   53.29
  11  -1  12   17.30   26.30
  11  -1  12   29.10   28.60
  11  -1  12   14.70   37.20
 -10   1 -12   11.10   48.00
 -10   1 -12   -2.50   38.60
  10  -1  12   -1.30   26.70
  10  -1  12   -5.60   23.60
  -9   1 -12  -25.30   44.10
  -9   1 -12   62.29   41.60
   9  -1  12   -7.00   21.60
   9  -1  12   24.50   28.20
  -8   1 -12   43.60   45.10
  -8   1 -12   17.90   20.20
  -8   1 -12   52.99   38.90
   8  -1  12   43.90   28.10
   8  -1  12   14.60   21.20
  -7   1 -12   -6.40   20.90
  -7   1 -12   10.10   37.70
  -7   1 -12   -9.80   36.40
   7  -1  12   36.80   20.20
   7  -1  12   -1.30   25.30
  -6   1 -12   51.89   23.80
  -6   1 -12   19.00   34.40
  -6   1 -12   33.10   37.30
   6  -1  12   47.20   26.30
   6  -1  12   56.89   20.20
  -5   1 -12   11.20   33.20
  -5   1 -12   50.39   35.90
  -5   1 -12   40.40   22.90
   5  -1  12   16.90   24.60
   5  -1  12   13.70   17.80
  -4   1 -12   60.59   24.30
  -4   1 -12   29.20   32.40
  -4   1 -12   -0.70   28.90
   4  -1  12    7.10   22.80
   4  -1  12  -10.70   15.30
  -3   1 -12   28.60   32.40
  -3   1 -12   53.99   27.40
  -3   1 -12   41.30   24.40
   3  -1  12   27.60   17.30
   3  -1  12   50.49   24.30
  -2   1 -12   31.20   24.00
  -2   1 -12   29.80   32.40
  -2   1 -12   38.30   23.40
   2  -1  12   41.10   18.70
   2  -1  12   71.29   24.60
  -1   1 -12  104.89   24.50
  -1   1 -12   82.79   35.00
  -1   1 -12   73.49   29.10
   1  -1  12  108.39   27.90
   1  -1  12  108.69   20.60
   0   1 -12   53.19   31.40
   0   1 -12   25.40   25.20
   0   1 -12   20.60   16.70
   0  -1  12   44.90   23.80
   0  -1  12   28.10   13.60
   1   1 -12   61.09   33.90
   1   1 -12  121.69   29.90
  -1  -1  12  118.59   28.60
   2   1 -12   48.20   28.70
   2   1 -12   51.49   27.30
  -2  -1  12   62.39   25.50
   3   1 -12  -27.40   25.60
   3   1 -12   20.00   25.60
  -3  -1  12   15.60   24.90
   4   1 -12    5.20   27.10
   4   1 -12  -40.70   23.80
   4   1 -12    9.80   30.70
   5   1 -12    7.80   27.20
   5   1 -12   78.49   35.10
   5   1 -12   62.29   26.90
   6   1 -12   60.69   36.20
   6   1 -12  100.19   33.70
   6   1 -12   66.09   31.40
   7   1 -12   11.00   35.50
   7   1 -12   33.50   30.90
   7   1 -12   32.30   30.50
   8   1 -12   56.89   31.90
   8   1 -12   52.79   39.50
   8   1 -12   27.70   29.60
  -8  -1  12   40.20   18.30
   9   1 -12   44.30   35.00
   9   1 -12  -19.50   37.50
   9   1 -12   28.60   31.60
  -9  -1  12   20.60   20.40
  10   1 -12  -60.79   38.10
  10   1 -12  -17.40   32.60
  10   1 -12    3.60   31.10
 -10  -1  12   51.19   23.30
  11   1 -12  -10.90   41.00
  11   1 -12  -11.00   34.50
  11   1 -12   -8.40   31.50
  12   1 -12   -2.50   43.50
  12   1 -12  -50.59   33.90
  13   1 -12   14.00   44.00
  13   1 -12  -21.60   37.30
  14   1 -12  -10.70   46.80
  14   1 -12   -3.40   41.10
  15   1 -12   63.79   56.19
  15   1 -12   12.40   43.20
  16   1 -12   10.80   47.10
  16   1 -12   49.40   61.49
  17   1 -12   -5.30   68.99
  17   1 -12    2.90   51.79
 -17   1 -11   37.00   61.69
 -17   1 -11    3.20   88.09
  17  -1  11  -62.39   57.79
  17  -1  11   25.30   59.19
 -16   1 -11   31.20   75.29
 -16   1 -11    4.60   52.69
  16  -1  11   58.29   53.59
  16  -1  11   17.60   34.70
 -15   1 -11    2.80   65.09
 -15   1 -11   -5.80   48.40
  15  -1  11  -23.30   43.70
  15  -1  11  -16.80   38.80
 -14   1 -11  -12.10   54.59
 -14   1 -11  -44.60   41.30
  14  -1  11  -13.40   40.90
  14  -1  11    2.30   31.00
 -13   1 -11   -0.10   43.20
 -13   1 -11  -12.60   53.49
  13  -1  11  -14.70   37.50
  13  -1  11  -59.39   26.50
 -12   1 -11   14.20   42.90
 -12   1 -11    7.50   51.39
  12  -1  11   14.10   29.00
  12  -1  11  -37.20   35.50
 -11   1 -11  -54.09   40.60
 -11   1 -11   73.59   50.49
  11  -1  11   30.70   28.20
  11  -1  11    8.70   26.90
  11  -1  11   10.30   34.60
 -10   1 -11   -8.90   46.30
 -10   1 -11  -66.69   38.60
  10  -1  11    9.20   24.10
  10  -1  11  -20.50   26.00
  -9   1 -11   84.69   40.80
  -9   1 -11   96.99   46.80
   9  -1  11   12.00   26.80
   9  -1  11    2.60   22.90
  -8   1 -11   83.29   21.50
  -8   1 -11  134.09   43.10
  -8   1 -11  104.39   45.40
   8  -1  11   67.79   20.40
   8  -1  11  112.59   25.70
   8  -1  11  122.09   31.30
  -7   1 -11   16.40   18.80
  -7   1 -11   54.49   38.20
  -7   1 -11   32.10   40.30
   7  -1  11   24.00   24.80
   7  -1  11   21.40   19.10
  -6   1 -11   77.39   22.30
  -6   1 -11   90.69   37.50
  -6   1 -11  105.29   39.40
   6  -1  11   94.79   26.60
   6  -1  11    2.40   19.00
  -5   1 -11   -5.20   30.40
  -5   1 -11    0.20   32.90
  -5   1 -11   10.70   20.80
   5  -1  11   27.10   17.30
   5  -1  11    9.70   22.50
  -4   1 -11   15.30   21.80
  -4   1 -11   72.79   30.50
  -4   1 -11   11.30   31.70
   4  -1  11   43.80   16.80
   4  -1  11   16.30   22.00
  -3   1 -11   76.79   25.40
  -3   1 -11  123.09   35.30
  -3   1 -11   34.80   28.50
   3  -1  11   84.79   20.20
   3  -1  11  120.19   26.30
   3  -1  11  127.59   25.30
  -2   1 -11  147.79   37.90
  -2   1 -11  108.69   26.50
  -2   1 -11  103.59   26.90
   2  -1  11  104.39   23.00
   2  -1  11  128.59   27.20
  -1   1 -11  100.09   22.90
  -1   1 -11   47.50   32.10
  -1   1 -11   66.89   25.60
   1  -1  11   78.69   25.00
   1  -1  11   86.49   19.30
   0   1 -11   88.29   33.20
   0   1 -11  124.29   27.50
   0   1 -11   64.19   18.30
   0  -1  11   66.49   15.80
   0  -1  11   48.60   23.90
   1   1 -11   82.99   27.50
   1   1 -11  130.89   32.90
  -1  -1  11   97.39   27.40
   2   1 -11   42.70   26.70
   2   1 -11   96.59   29.60
  -2  -1  11  159.08   29.80
   3   1 -11  120.29   30.50
   3   1 -11   88.49   32.80
   3   1 -11   70.99   29.50
  -3  -1  11  163.18   31.00
   4   1 -11   43.30   26.70
   4   1 -11  104.09   33.10
   4   1 -11   23.50   23.50
   5   1 -11   24.30   25.80
   5   1 -11   10.10   29.30
   5   1 -11   54.19   28.40
   6   1 -11   84.89   28.60
   6   1 -11   50.09   33.40
   6   1 -11   74.39   31.80
   7   1 -11  -49.60   24.50
   7   1 -11   35.70   29.60
   7   1 -11  -41.00   32.70
  -7  -1  11   26.00   15.00
   8   1 -11  109.59   41.90
   8   1 -11   64.79   32.50
   8   1 -11  160.58   36.80
  -8  -1  11  181.28   26.30
   9   1 -11   95.69   40.60
   9   1 -11   79.29   35.70
   9   1 -11   80.49   32.20
  -9  -1  11   71.99   23.40
  10   1 -11  -42.40   35.10
  10   1 -11    6.50   29.60
  10   1 -11  -13.80   30.60
 -10  -1  11  -34.40   21.20
  11   1 -11   58.59   31.60
  11   1 -11   16.40   33.90
  11   1 -11  -14.60   38.80
 -11  -1  11   21.30   26.70
  12   1 -11   22.70   40.90
  12   1 -11   34.80   34.90
 -12  -1  11  -34.90   27.40
  13   1 -11   56.39   38.70
  13   1 -11  -10.40   41.30
  14   1 -11  -18.00   45.50
  14   1 -11   79.39   40.20
  15   1 -11   -2.20   49.40
  15   1 -11   -3.30   39.50
  16   1 -11    6.10   55.79
  16   1 -11  -48.20   41.60
  17   1 -11  188.58   69.69
  17   1 -11   -7.10   43.90
 -17   1 -10    1.80   76.09
 -17   1 -10  -10.70   54.99
  17  -1  10  -20.50   52.09
  17  -1  10    8.30   38.40
 -16   1 -10  -91.79   66.69
 -16   1 -10   26.80   49.20
  16  -1  10  -40.20   32.20
  16  -1  10  -22.80   46.80
 -15   1 -10   58.79   63.09
 -15   1 -10    2.40   44.60
  15  -1  10  -20.10   31.00
  15  -1  10   26.90   41.90
  15  -1  10   16.90   41.50
 -14   1 -10   19.00   59.59
 -14   1 -10    4.50   45.20
  14  -1  10   46.10   41.10
  14  -1  10  -47.10   35.60
 -13   1 -10   -0.40   43.80
 -13   1 -10   76.99   59.19
  13  -1  10   37.00   30.50
  13  -1  10  -75.39   33.50
 -12   1 -10  -21.40   41.10
 -12   1 -10   -4.10   48.40
  12  -1  10    7.50   37.60
  12  -1  10  -30.40   26.30
 -11   1 -10  109.89   50.99
 -11   1 -10   54.79   44.40
  11  -1  10   47.70   29.90
  11  -1  10   86.89   31.10
  11  -1  10   67.29   40.40
 -10   1 -10  115.39   50.29
 -10   1 -10   88.29   40.90
  10  -1  10   65.59   29.70
  10  -1  10   74.49   27.70
  10  -1  10   54.89   36.00
  -9   1 -10   19.40   35.80
  -9   1 -10   28.60   42.90
   9  -1  10  -12.60   16.40
   9  -1  10   -5.20   23.60
   9  -1  10    6.70   25.20
  -8   1 -10   43.60   39.30
  -8   1 -10   77.29   36.90
  -8   1 -10   45.40   15.10
   8  -1  10   51.19   18.10
   8  -1  10   30.00   22.00
   8  -1  10  -11.30   24.50
  -7   1 -10   18.30   33.60
  -7   1 -10  -22.90   34.80
  -7   1 -10   64.89   17.80
   7  -1  10   67.49   20.70
   7  -1  10   -9.40   14.10
   7  -1  10   91.79   26.00
  -6   1 -10  124.29   24.60
  -6   1 -10   61.79   38.90
  -6   1 -10  127.89   40.00
   6  -1  10  113.29   24.60
   6  -1  10  136.39   25.10
   6  -1  10  179.58   30.50
  -5   1 -10   65.89   33.90
  -5   1 -10  100.49   34.40
  -5   1 -10   21.50   20.20
   5  -1  10   36.70   17.90
   5  -1  10   54.99   23.30
  -4   1 -10  -44.20   25.80
  -4   1 -10  -16.00   17.60
  -4   1 -10    2.80   29.60
   4  -1  10   10.00   15.60
   4  -1  10    7.60   20.20
  -3   1 -10   51.19   22.40
  -3   1 -10  100.99   28.40
  -3   1 -10   73.29   33.10
   3  -1  10   46.40   23.60
   3  -1  10   82.69   23.20
   3  -1  10  111.99   19.80
  -2   1 -10  250.07   38.00
  -2   1 -10  301.37   46.60
  -2   1 -10  234.98   37.60
   2  -1  10  239.48   35.20
   2  -1  10  270.87   38.20
  -1   1 -10   86.09   22.00
  -1   1 -10   87.59   30.10
  -1   1 -10  105.39   26.20
   1  -1  10   94.89   19.50
   1  -1  10  111.29   26.00
   0   1 -10   70.89   16.90
   0   1 -10   62.59   28.10
   0   1 -10   31.60   23.40
   0  -1  10   48.10   14.40
   0  -1  10   62.89   22.90
   1   1 -10  103.19   29.10
   1   1 -10  138.69   33.10
  -1  -1  10  126.99   27.80
   2   1 -10  261.97   41.20
   2   1 -10  223.08   39.30
  -2  -1  10  292.17   41.20
   3   1 -10   84.49   27.10
   3   1 -10   84.99   29.80
   3   1 -10   66.39   26.10
   4   1 -10   33.90   28.30
   4   1 -10   27.30   24.10
   4   1 -10   -2.90   23.40
   5   1 -10   35.50   27.00
   5   1 -10   70.89   26.40
   5   1 -10   79.69   31.00
   6   1 -10  157.48   40.00
   6   1 -10  109.99   34.70
   6   1 -10  208.78   35.30
  -6  -1  10  175.78   24.00
   7   1 -10   23.90   28.10
   7   1 -10  123.19   28.90
   7   1 -10   11.30   32.10
  -7  -1  10   64.59   22.60
  -7  -1  10   89.99   19.60
   8   1 -10   52.99   29.00
   8   1 -10   58.69   35.10
   8   1 -10   69.59   28.00
  -8  -1  10   60.89   21.30
  -8  -1  10   54.39   19.50
   9   1 -10   12.80   29.70
   9   1 -10   -0.70   27.50
   9   1 -10  -14.50   32.50
  -9  -1  10   -0.20   21.50
  -9  -1  10  -18.50   15.90
  10   1 -10   84.19   35.30
  10   1 -10  169.28   34.80
  10   1 -10   71.39   41.50
 -10  -1  10  104.39   29.20
  11   1 -10   51.49   33.90
  11   1 -10   64.69   40.10
  11   1 -10   70.59   30.80
 -11  -1  10   21.20   27.90
 -11  -1  10   98.19   29.80
  12   1 -10  -38.90   38.30
  12   1 -10   46.60   34.70
 -12  -1  10  -93.99   27.10
  13   1 -10  -15.60   38.70
  13   1 -10  -10.60   33.80
 -13  -1  10  -29.70   30.30
  14   1 -10   -0.80   43.80
  14   1 -10   51.29   36.90
 -14  -1  10   -7.10   33.60
  15   1 -10   39.80   38.40
  15   1 -10  -69.69   42.20
  16   1 -10   71.29   45.30
  16   1 -10   48.50   54.99
  17   1 -10   86.69   47.90
  17   1 -10  -35.20   59.39
  18   1 -10   66.79   94.29
 -18   1  -9  -20.60   84.59
  18  -1   9   31.60   70.19
  18  -1   9  -16.30   36.70
 -17   1  -9    7.20   55.49
 -17   1  -9 -192.58   67.09
  17  -1   9   17.30   34.00
  17  -1   9   10.20   52.79
 -16   1  -9    4.50   64.19
 -16   1  -9  -84.79   42.80
  16  -1   9  -16.30   31.70
  16  -1   9  -40.70   42.70
 -15   1  -9  -90.39   54.99
 -15   1  -9  -29.40   42.90
  15  -1   9  -34.80   29.50
  15  -1   9  -11.60   42.20
 -14   1  -9  104.19   58.09
 -14   1  -9  -27.30   39.80
  14  -1   9   36.00   36.20
  14  -1   9  -31.50   28.80
  14  -1   9  -38.80   36.30
 -13   1  -9   17.50   42.40
 -13   1  -9   -7.20   52.19
  13  -1   9   49.00   38.10
  13  -1   9   71.79   35.10
 -12   1  -9   -2.80   40.10
 -12   1  -9  -37.50   47.60
  12  -1   9   96.29   40.10
  12  -1   9   -9.70   26.00
 -11   1  -9   69.69   48.10
 -11   1  -9   43.00   41.00
  11  -1   9   38.10   28.90
  11  -1   9   42.30   28.40
  11  -1   9   20.00   34.70
 -10   1  -9   50.89   42.50
 -10   1  -9  -75.69   31.50
  10  -1   9   15.30   32.10
  10  -1   9   29.80   26.10
  10  -1   9   29.80   25.20
  -9   1  -9   33.20   36.70
  -9   1  -9  113.79   42.00
   9  -1   9   -8.70   22.00
   9  -1   9  -11.50   23.40
  -8   1  -9   54.39   35.30
  -8   1  -9   92.69   39.10
   8  -1   9   25.90   21.00
   8  -1   9   24.80   15.20
   8  -1   9   12.60   23.70
  -7   1  -9   40.10   34.10
  -7   1  -9   80.59   17.70
  -7   1  -9   54.59   34.80
   7  -1   9   95.89   25.80
   7  -1   9   62.79   17.60
   7  -1   9   64.59   21.50
  -6   1  -9   82.89   32.90
  -6   1  -9   16.00   31.60
  -6   1  -9   20.80   16.40
   6  -1   9   71.59   23.40
   6  -1   9   21.00   15.90
   6  -1   9   32.00   18.50
  -5   1  -9   19.60   17.60
  -5   1  -9   18.40   28.60
  -5   1  -9   29.50   30.90
   5  -1   9   30.00   21.20
   5  -1   9   32.90   17.80
  -4   1  -9   27.10   29.70
  -4   1  -9    1.60   26.40
  -4   1  -9   -3.00   17.50
   4  -1   9   10.10   15.50
   4  -1   9    5.50   18.70
  -3   1  -9   76.59   31.90
  -3   1  -9  111.89   28.70
  -3   1  -9   94.09   23.10
   3  -1   9   86.79   23.80
   3  -1   9   94.59   23.80
   3  -1   9  101.89   20.00
  -2   1  -9   61.09   24.00
  -2   1  -9   60.89   22.60
  -2   1  -9   55.79   29.20
   2  -1   9   79.99   19.90
   2  -1   9   74.59   22.40
  -1   1  -9   34.30   20.20
  -1   1  -9   31.30   18.30
  -1   1  -9   51.39   26.60
   1  -1   9   19.10   17.60
   1  -1   9    0.50   19.20
   1  -1   9    6.50   15.10
   0   1  -9   20.50   26.10
   0   1  -9   -0.10   14.50
   0   1  -9   14.10   19.90
   0  -1   9   11.20   19.80
   0  -1   9   11.00   12.40
   1   1  -9   34.90   25.40
   1   1  -9   -3.70   21.00
  -1  -1   9    3.90   20.30
   2   1  -9   80.89   25.50
   2   1  -9   65.89   23.50
   2   1  -9   38.60   25.20
  -2  -1   9   59.79   24.10
   3   1  -9   97.59   29.10
   3   1  -9  103.49   28.00
   3   1  -9  121.59   27.80
  -3  -1   9  104.99   28.50
   4   1  -9   12.00   25.90
   4   1  -9   21.20   22.20
   4   1  -9   43.20   21.60
  -4  -1   9   29.30   19.20
   5   1  -9   73.29   24.40
   5   1  -9   19.10   21.60
   5   1  -9   79.89   29.80
  -5  -1   9   34.20   13.00
  -5  -1   9   58.29   19.70
   6   1  -9   18.00   24.30
   6   1  -9   14.00   22.50
   6   1  -9    0.40   27.40
  -6  -1   9   42.40   16.00
  -6  -1   9   63.09   18.90
   7   1  -9   75.29   26.40
   7   1  -9   55.39   31.00
   7   1  -9    6.20   25.90
  -7  -1   9   67.89   20.20
  -7  -1   9   96.59   21.10
   8   1  -9   -1.10   23.10
   8   1  -9   35.20   31.10
   8   1  -9   21.50   26.00
  -8  -1   9   28.60   20.00
  -8  -1   9   48.30   17.20
   9   1  -9   40.10   26.40
   9   1  -9   40.40   27.60
   9   1  -9   63.99   34.50
  -9  -1   9   43.50   23.60
  -9  -1   9   13.40   15.50
  10   1  -9   42.60   26.10
  10   1  -9   -8.00   27.60
  10   1  -9  -16.00   33.60
 -10  -1   9   42.10   21.70
 -10  -1   9   20.10   25.50
  11   1  -9   16.40   31.20
  11   1  -9  111.39   39.70
 -11  -1   9   57.19   21.60
 -11  -1   9   30.90   29.60
  12   1  -9   24.40   33.00
  12   1  -9   36.30   40.60
 -12  -1   9  -49.30   26.90
  13   1  -9    6.80   34.00
  13   1  -9  -33.80   38.70
 -13  -1   9  -46.60   30.90
  14   1  -9  -39.70   41.50
  14   1  -9    7.90   33.10
 -14  -1   9  -67.99   33.60
  15   1  -9   15.10   35.90
  15   1  -9  -64.49   42.70
 -15  -1   9   -2.40   37.40
  16   1  -9  -32.00   46.40
  16   1  -9  -30.00   38.70
 -16  -1   9    9.20   46.00
  17   1  -9  -64.59   54.49
  17   1  -9  -31.20   52.99
  18   1  -9   54.59   69.09
 -18   1  -8  -32.20   79.79
  18  -1   8   25.70   39.10
  18  -1   8  -12.60   56.99
 -17   1  -8  -88.89   66.19
  17  -1   8   75.89   56.89
  17  -1   8  -25.20   33.70
 -16   1  -8   -6.60   61.29
 -16   1  -8   68.39   45.60
  16  -1   8   39.60   43.80
  16  -1   8  -18.40   32.80
 -15   1  -8   79.39   57.59
 -15   1  -8   50.49   43.70
  15  -1   8   11.50   32.40
  15  -1   8   41.40   41.10
 -14   1  -8  -10.50   39.70
 -14   1  -8   22.90   50.49
  14  -1   8  -64.79   34.50
  14  -1   8   44.70   31.10
 -13   1  -8   62.69   47.60
 -13   1  -8   31.40   40.40
  13  -1   8   -0.40   35.90
  13  -1   8   16.70   32.90
 -12   1  -8   18.20   43.40
 -12   1  -8   91.09   40.80
  12  -1   8   77.29   30.30
  12  -1   8   59.09   37.50
 -11   1  -8   66.29   44.60
 -11   1  -8  -42.60   34.40
  11  -1   8   60.19   29.10
  11  -1   8   -4.10   26.90
  11  -1   8    6.10   34.40
 -10   1  -8   31.00   33.80
 -10   1  -8   49.20   41.60
  10  -1   8   50.59   25.50
  10  -1   8   56.39   35.60
  10  -1   8   46.20   26.70
  -9   1  -8   54.89   35.90
  -9   1  -8  132.29   44.50
   9  -1   8   83.09   26.40
   9  -1   8   63.29   26.70
   9  -1   8   77.49   35.40
  -8   1  -8   91.09   34.10
  -8   1  -8   51.09   36.70
   8  -1   8   59.09   24.50
   8  -1   8   64.89   16.00
   8  -1   8   97.99   23.90
  -7   1  -8   52.99   29.60
  -7   1  -8   17.30   11.50
  -7   1  -8   -5.80   31.60
   7  -1   8   15.60   20.60
   7  -1   8   27.00   14.60
   7  -1   8   -6.50   20.90
  -6   1  -8   47.40   15.20
  -6   1  -8  -38.00   18.90
  -6   1  -8   38.40   31.00
  -6   1  -8  100.29   34.60
   6  -1   8   98.89   17.10
   6  -1   8   63.19   22.80
   6  -1   8   61.19   20.40
  -5   1  -8  261.77   35.40
  -5   1  -8  274.27   46.20
  -5   1  -8  280.87   47.30
   5  -1   8  320.07   40.30
   5  -1   8  294.77   37.20
  -4   1  -8   38.50   26.10
  -4   1  -8   34.10   16.40
  -4   1  -8   67.79   29.00
  -4   1  -8    9.10   24.30
   4  -1   8   36.10   16.70
   4  -1   8   14.90   19.70
   4  -1   8   41.20   24.70
  -3   1  -8   29.60   17.70
  -3   1  -8   16.20   23.70
  -3   1  -8   49.90   23.10
  -3   1  -8   -9.10   26.90
   3  -1   8   26.20   18.90
   3  -1   8   25.40   16.20
   3  -1   8   24.20   19.00
  -2   1  -8   78.79   23.10
  -2   1  -8   55.79   29.30
  -2   1  -8   67.29   20.70
  -2   1  -8   55.09   25.10
   2  -1   8   49.40   21.60
   2  -1   8   64.69   19.10
  -1   1  -8  130.49   24.00
  -1   1  -8  144.29   32.50
  -1   1  -8  112.99   25.30
   1  -1   8   57.89   21.20
   1  -1   8  145.49   21.70
   1  -1   8  177.98   27.10
   0   1  -8  215.58   35.90
   0   1  -8  178.08   24.80
   0   1  -8  149.59   29.80
   0  -1   8  172.68   30.40
   0  -1   8  187.38   24.10
   1   1  -8  132.79   28.10
   1   1  -8   86.59   25.00
  -1  -1   8   99.59   24.40
  -1  -1   8   47.40   18.60
  -1  -1   8  117.59   24.10
   2   1  -8   73.09   24.60
   2   1  -8   44.40   24.40
   2   1  -8  107.59   26.80
   2   1  -8   35.80   20.60
  -2  -1   8   63.59   20.80
   3   1  -8   50.89   22.00
   3   1  -8   28.70   22.40
   3   1  -8   37.00   25.10
  -3  -1   8   30.60   18.30
   4   1  -8  -11.50   21.80
   4   1  -8   57.39   26.30
   4   1  -8   17.80   20.70
  -4  -1   8   27.70   17.70
   5   1  -8  315.07   47.60
   5   1  -8  364.56   43.30
   5   1  -8  290.87   44.50
  -5  -1   8  350.16   40.80
  -5  -1   8  282.57   36.60
   6   1  -8   78.19   23.60
   6   1  -8   91.09   31.40
   6   1  -8   49.80   25.70
  -6  -1   8   95.19   19.90
  -6  -1   8   77.69   19.90
   7   1  -8   41.70   22.30
   7   1  -8   44.50   25.30
   7   1  -8    2.30   28.10
  -7  -1   8   30.90   16.40
  -7  -1   8   29.60   19.40
   8   1  -8   17.30   30.40
   8   1  -8   73.99   24.40
   8   1  -8   62.19   27.90
  -8  -1   8   58.29   23.00
  -8  -1   8   52.19   16.90
   9   1  -8   82.19   34.80
   9   1  -8  104.19   26.40
   9   1  -8   76.69   29.30
  -9  -1   8   32.80   16.90
  -9  -1   8   92.99   27.00
  10   1  -8  124.89   28.40
  10   1  -8   78.69   30.80
  10   1  -8   85.59   36.40
 -10  -1   8   36.40   27.70
 -10  -1   8   29.20   16.00
 -10  -1   8   71.69   22.70
  11   1  -8   55.19   31.40
  11   1  -8    2.90   33.60
 -11  -1   8   14.30   30.10
 -11  -1   8   38.10   17.30
  12   1  -8   65.99   42.90
  12   1  -8   77.59   32.20
  12   1  -8   54.89   39.60
 -12  -1   8  -40.50   32.20
  13   1  -8   37.30   40.80
  13   1  -8    4.10   31.30
  13   1  -8   -6.90   43.00
 -13  -1   8   25.80   33.60
  14   1  -8   17.00   42.60
  14   1  -8   -9.00   31.10
  14   1  -8  -21.40   39.70
 -14  -1   8  -34.80   34.10
  15   1  -8  -56.09   41.00
  15   1  -8    0.10   42.20
  15   1  -8   -8.40   34.50
 -15  -1   8  -36.90   36.00
  16   1  -8  -31.90   35.90
  16   1  -8   56.59   51.39
  16   1  -8   31.60   47.00
 -16  -1   8   19.30   43.50
  17   1  -8  -86.59   56.79
  17   1  -8  -80.29   46.80
 -17  -1   8   23.30   48.70
  18   1  -8  -42.90   58.79
  18   1  -8   55.29   70.79
  19  -1   7   94.79   66.89
 -18   1  -7 -130.59   72.99
  18  -1   7  -65.99   51.59
  18  -1   7  -32.30   37.20
 -17   1  -7   49.50   69.99
  17  -1   7  -10.90   33.70
  17  -1   7   41.20   52.69
 -16   1  -7   -6.10   40.40
 -16   1  -7  -18.30   57.79
  16  -1   7   36.90   32.80
  16  -1   7   -8.50   40.90
 -15   1  -7   11.50   51.69
 -15   1  -7    9.60   39.50
  15  -1   7  -14.40   31.60
  15  -1   7   52.59   44.20
 -14   1  -7    1.30   37.20
 -14   1  -7  -17.00   51.79
  14  -1   7  -71.89   38.00
  14  -1   7   -6.00   29.40
 -13   1  -7  -28.10   34.30
 -13   1  -7   57.39   51.49
  13  -1   7  -10.00   27.40
  13  -1   7  -42.00   32.60
  13  -1   7   -1.70   36.30
 -12   1  -7  -21.10   46.20
 -12   1  -7  -16.40   34.70
  12  -1   7   54.29   38.20
  12  -1   7   48.50   32.20
 -11   1  -7  100.69   37.80
 -11   1  -7  122.09   49.20
  11  -1   7   39.70   28.10
  11  -1   7  107.39   31.60
  11  -1   7   61.89   35.20
 -10   1  -7   74.19   35.00
 -10   1  -7   81.39   44.10
  10  -1   7   90.99   29.60
  10  -1   7  161.68   30.70
  10  -1   7   90.99   36.50
  -9   1  -7  167.68   38.00
  -9   1  -7  126.39   43.40
   9  -1   7  104.69   29.30
   9  -1   7  183.38   38.90
   9  -1   7  166.68   31.60
  -8   1  -7   35.10   33.50
  -8   1  -7   34.00   30.60
   8  -1   7   39.50   29.90
   8  -1   7   33.00   21.40
   8  -1   7   49.70   21.60
  -7   1  -7   33.80   30.80
  -7   1  -7   87.29   34.90
   7  -1   7   49.60   21.00
   7  -1   7   27.70   13.70
   7  -1   7   48.40   22.00
  -6   1  -7  225.98   37.70
  -6   1  -7  139.59   21.60
  -6   1  -7  158.38   38.50
   6  -1   7  163.38   29.60
   6  -1   7  158.38   23.80
   6  -1   7  179.58   27.70
  -5   1  -7    3.30   26.70
  -5   1  -7   23.00   28.00
  -5   1  -7   30.80   14.20
  -5   1  -7   43.50   21.90
  -5   1  -7   17.80   20.90
   5  -1   7   33.60   20.30
   5  -1   7   32.10   18.20
  -4   1  -7  582.44   65.59
  -4   1  -7  632.74   69.39
  -4   1  -7  589.24   72.29
  -4   1  -7  673.73   73.69
   4  -1   7  538.45   68.19
   4  -1   7  598.44   66.59
   4  -1   7  661.03   69.39
  -3   1  -7  225.88   33.90
  -3   1  -7  290.77   38.90
  -3   1  -7  277.97   40.10
  -3   1  -7  245.88   42.20
   3  -1   7  254.37   37.50
   3  -1   7  282.27   34.30
   3  -1   7  306.97   37.60
  -2   1  -7   56.59   23.80
  -2   1  -7   37.30   18.40
  -2   1  -7   85.99   23.80
  -2   1  -7   93.29   28.50
   2  -1   7   88.29   20.50
   2  -1   7   73.79   21.30
  -1   1  -7  408.46   44.60
  -1   1  -7  357.46   45.40
  -1   1  -7  396.96   49.60
  -1   1  -7  290.67   41.20
   1  -1   7  376.26   44.00
   1  -1   7  311.37   40.40
   1  -1   7  380.76   45.50
   0   1  -7   38.20   14.70
   0   1  -7   48.70   20.40
   0   1  -7   75.69   25.20
   0  -1   7   49.80   13.40
   0  -1   7   68.09   21.40
   0  -1   7   88.09   17.80
   0  -1   7   42.00   19.90
   1   1  -7  368.56   49.10
   1   1  -7  376.36   47.00
   1   1  -7  291.07   45.90
  -1  -1   7  438.46   47.50
  -1  -1   7  368.76   46.50
  -1  -1   7  387.86   45.60
   2   1  -7   71.89   23.30
   2   1  -7   36.50   20.90
   2   1  -7   49.80   22.10
   2   1  -7   72.29   20.60
  -2  -1   7   -8.70   13.80
  -2  -1   7   88.29   24.20
  -2  -1   7   88.49   19.90
   3   1  -7  261.07   40.00
   3   1  -7  189.08   36.00
   3   1  -7  250.77   37.00
  -3  -1   7  345.17   37.20
   4   1  -7  616.44   67.49
   4   1  -7  546.05   67.49
   4   1  -7  674.13   71.99
  -4  -1   7  613.24   65.69
  -4  -1   7  562.34   62.29
   5   1  -7   40.90   20.10
   5   1  -7   35.20   23.40
   5   1  -7   84.89   27.60
  -5  -1   7   42.50   17.00
  -5  -1   7   52.59   16.60
   6   1  -7  167.68   36.90
   6   1  -7  181.88   31.10
   6   1  -7  155.58   33.70
  -6  -1   7  199.48   27.90
  -6  -1   7  265.47   31.20
   7   1  -7   23.20   22.40
   7   1  -7   18.60   26.40
   7   1  -7   18.70   19.90
  -7  -1   7   18.00   13.90
  -7  -1   7   50.19   21.00
  -7  -1   7   47.20   18.30
   8   1  -7   25.30   21.30
   8   1  -7  -15.90   25.10
   8   1  -7   20.30   22.90
  -8  -1   7   22.50   18.00
  -8  -1   7   19.60   23.20
  -8  -1   7   -0.60   13.30
   9   1  -7  158.98   29.90
   9   1  -7  153.38   37.60
   9   1  -7  122.89   31.70
   9   1  -7  164.88   39.60
  -9  -1   7  153.08   22.30
  -9  -1   7  139.79   32.40
  -9  -1   7  144.69   26.80
  -9  -1   7  131.19   27.20
  10   1  -7  167.58   42.10
  10   1  -7   93.59   31.90
  10   1  -7  143.49   39.00
 -10  -1   7  149.09   22.80
 -10  -1   7   54.39   30.40
 -10  -1   7   53.29   23.60
 -10  -1   7  120.99   19.20
  11   1  -7  142.29   42.90
  11   1  -7   72.39   31.40
  11   1  -7   83.69   37.10
 -11  -1   7   44.40   32.40
 -11  -1   7   77.19   18.00
  12   1  -7   25.30   27.90
  12   1  -7  -28.30   32.00
  12   1  -7   92.89   43.90
 -12  -1   7   48.80   33.40
  13   1  -7   -4.70   38.80
  13   1  -7  -34.20   35.40
  13   1  -7   39.40   32.40
 -13  -1   7   10.30   34.40
  14   1  -7   42.40   40.50
  14   1  -7   52.09   44.30
  14   1  -7   32.00   33.20
 -14  -1   7   18.50   38.00
  15   1  -7   23.10   35.70
  15   1  -7  -68.69   37.20
  15   1  -7   13.90   44.10
 -15  -1   7  -13.10   37.20
  16   1  -7   26.10   46.50
  16   1  -7    1.10   36.30
  16   1  -7   69.79   46.80
 -16  -1   7    4.20   45.20
  17   1  -7   -0.70   56.19
  17   1  -7  -63.19   46.90
 -17  -1   7    3.10   48.20
  18   1  -7  -18.50   56.89
  18   1  -7  -10.00   57.99
 -18  -1   7   34.60   58.09
 -19   1  -6  -51.59  105.99
  19  -1   6  -99.59   39.70
 -18   1  -6  -95.99   67.49
  18  -1   6  -49.40   51.39
  18  -1   6   14.20   38.90
 -17   1  -6  -11.60   64.39
  17  -1   6   15.10   50.89
  17  -1   6   49.80   36.20
 -16   1  -6  -65.79   54.49
 -16   1  -6   12.80   39.10
  16  -1   6  -56.09   28.90
  16  -1   6   32.50   44.60
 -15   1  -6   27.30   37.30
 -15   1  -6  140.69   57.19
  15  -1   6  -33.80   40.90
  15  -1   6    0.90   30.40
 -14   1  -6   -2.60   50.89
 -14   1  -6  -11.10   34.40
  14  -1   6   14.80   38.20
  14  -1   6  -19.90   28.10
 -13   1  -6   -7.60   32.20
 -13   1  -6  -14.30   46.70
  13  -1   6   39.50   35.90
  13  -1   6   23.30   28.40
 -12   1  -6  111.79   48.20
 -12   1  -6   48.80   34.30
  12  -1   6  -15.70   30.70
  12  -1   6   19.00   32.50
  12  -1   6   57.09   27.60
 -11   1  -6   79.39   42.00
 -11   1  -6   65.89   35.00
  11  -1   6  110.79   32.40
  11  -1   6  -14.40   27.70
  11  -1   6   47.40   34.90
 -10   1  -6   69.49   38.40
 -10   1  -6  131.59   36.40
  10  -1   6   74.69   35.60
  10  -1   6  120.59   28.50
  10  -1   6   98.89   29.90
  -9   1  -6    3.00   29.10
  -9   1  -6   49.10   34.30
   9  -1   6   15.80   28.30
   9  -1   6   40.70   24.30
   9  -1   6   53.69   23.50
  -8   1  -6   47.00   28.30
  -8   1  -6   32.80   32.70
   8  -1   6   43.50   29.60
   8  -1   6   19.10   21.90
   8  -1   6    6.90   21.80
  -7   1  -6  252.77   47.60
  -7   1  -6  226.08   43.70
   7  -1   6  268.37   37.50
   7  -1   6  270.47   36.70
  -6   1  -6   82.09   24.40
  -6   1  -6   92.89   33.10
  -6   1  -6    2.70   18.20
  -6   1  -6   44.70   27.60
   6  -1   6   67.69   14.50
   6  -1   6   53.89   20.80
   6  -1   6   85.59   21.20
  -5   1  -6  189.98   31.90
  -5   1  -6  150.78   37.50
  -5   1  -6  236.08   40.80
  -5   1  -6  260.17   32.10
  -5   1  -6  176.98   24.10
   5  -1   6  185.58   25.80
   5  -1   6  168.58   28.90
   5  -1   6  220.78   31.50
  -4   1  -6  382.16   43.80
  -4   1  -6  412.26   48.80
  -4   1  -6  445.46   53.79
  -4   1  -6  404.46   48.70
  -4   1  -6  385.46   52.89
   4  -1   6  425.76   47.90
   4  -1   6  362.86   46.70
   4  -1   6  327.17   48.50
  -3   1  -6  537.45   69.99
  -3   1  -6  549.35   67.99
  -3   1  -6  587.74   64.89
  -3   1  -6  597.94   68.09
   3  -1   6  637.14   67.19
   3  -1   6  636.54   65.89
   3  -1   6  622.94   67.39
  -2   1  -6  240.18   34.30
  -2   1  -6  244.28   33.90
  -2   1  -6  261.77   37.70
  -2   1  -6  207.88   30.80
   2  -1   6  198.38   30.20
   2  -1   6  283.17   33.20
   2  -1   6  228.38   32.40
  -1   1  -6  329.07   43.40
  -1   1  -6  318.37   41.10
  -1   1  -6  380.06   47.10
  -1   1  -6  339.47   41.00
   1  -1   6  374.66   42.60
   1  -1   6  359.76   44.00
   1  -1   6  312.37   39.20
   0   1  -6   34.50   17.10
   0   1  -6   -0.40   12.30
   0   1  -6    2.40   20.40
   0  -1   6   12.30   14.80
   0  -1   6   14.70   10.90
   0  -1   6    2.20   17.60
   0  -1   6   -1.80   17.10
   1   1  -6  361.86   44.70
   1   1  -6  344.67   44.50
   1   1  -6  382.86   46.60
  -1  -1   6  358.66   42.00
  -1  -1   6  368.16   43.40
  -1  -1   6  342.77   44.70
   2   1  -6  210.48   33.60
   2   1  -6  246.68   32.70
   2   1  -6  246.98   32.50
   2   1  -6  175.98   32.50
  -2  -1   6  222.28   30.50
  -2  -1   6  246.38   31.80
   3   1  -6  688.53   66.89
   3   1  -6  633.54   69.39
   3   1  -6  604.64   68.09
  -3  -1   6  571.14   65.29
  -3  -1   6  549.15   66.49
  -3  -1   6  570.94   61.69
   4   1  -6  456.85   53.59
   4   1  -6  425.06   50.59
   4   1  -6  444.76   54.39
  -4  -1   6  389.36   48.30
  -4  -1   6  429.46   46.90
   5   1  -6  211.98   31.70
   5   1  -6  216.18   35.00
   5   1  -6  189.08   36.40
  -5  -1   6  225.18   29.60
  -5  -1   6  248.28   32.00
   6   1  -6   46.30   25.70
   6   1  -6   62.09   21.10
   6   1  -6   58.69   22.10
   6   1  -6   77.49   19.90
  -6  -1   6   47.00   18.00
  -6  -1   6   24.50   14.60
  -6  -1   6   40.20   20.20
   7   1  -6  207.98   41.20
   7   1  -6  295.57   46.00
   7   1  -6  270.07   41.70
   7   1  -6  385.26   41.50
   7   1  -6  333.77   49.40
  -7  -1   6  289.27   41.80
  -7  -1   6  314.07   38.50
   8   1  -6   75.39   31.10
   8   1  -6   42.30   20.60
   8   1  -6    5.20   25.10
   8   1  -6   46.20   22.80
  -8  -1   6   48.70   24.60
  -8  -1   6   39.80   18.70
  -8  -1   6   57.49   19.20
   9   1  -6    3.90   22.80
   9   1  -6   38.10   28.20
   9   1  -6   49.50   33.30
  -9  -1   6   -7.30   17.40
  -9  -1   6   -8.90   24.80
  -9  -1   6   43.10   17.00
  10   1  -6  152.68   39.80
  10   1  -6  105.99   34.20
  10   1  -6  123.99   31.30
 -10  -1   6   76.29   31.60
 -10  -1   6   96.99   19.40
 -10  -1   6  138.19   25.20
  11   1  -6   63.99   41.00
  11   1  -6   95.29   30.20
  11   1  -6   21.20   33.70
 -11  -1   6   32.10   20.70
 -11  -1   6   19.70   31.40
 -11  -1   6   39.60   14.70
  12   1  -6   37.80   34.10
  12   1  -6    6.70   27.70
  12   1  -6    4.50   38.20
 -12  -1   6    9.40   30.10
  13   1  -6   77.69   43.40
  13   1  -6   22.90   36.50
  13   1  -6    7.10   29.50
 -13  -1   6   24.60   37.10
  14   1  -6    6.60   30.50
  14   1  -6    6.70   37.00
  14   1  -6  -48.80   42.50
 -14  -1   6   23.90   38.80
  15   1  -6   22.10   41.20
  15   1  -6   96.69   49.20
  15   1  -6   19.80   35.00
 -15  -1   6   65.29   45.80
  16   1  -6   31.90   41.80
  16   1  -6  -21.10   34.80
  16   1  -6   45.60   49.00
 -16  -1   6    6.90   45.80
  17   1  -6   80.89   49.90
  17   1  -6  -24.70   55.69
 -17  -1   6  -12.60   48.40
  18   1  -6  160.58   68.49
  18   1  -6   77.09   55.29
 -18  -1   6   45.10   55.69
  19   1  -6   26.00   65.29
  19   1  -6  106.39   89.29
 -19  -1   6  -15.30   73.59
 -19   1  -5  121.49   89.59
  19  -1   5   10.70   67.89
  19  -1   5  -43.40   44.20
 -18   1  -5 -106.99   68.49
  18  -1   5  -23.90   54.29
  18  -1   5   94.99   43.00
 -17   1  -5  -53.99   57.69
  17  -1   5  -42.10   45.30
  17  -1   5    3.60   33.10
 -16   1  -5   73.59   37.80
 -16   1  -5   78.69   59.59
  16  -1   5   -5.10   31.70
  16  -1   5  -37.40   42.40
 -15   1  -5   21.40   49.00
 -15   1  -5   13.80   34.80
  15  -1   5  -37.30   39.70
  15  -1   5   -5.00   29.90
 -14   1  -5   56.19   34.60
 -14   1  -5   57.09   50.99
  14  -1   5   16.40   29.90
  14  -1   5  -11.00   38.50
 -13   1  -5   13.20   45.70
 -13   1  -5   42.90   33.70
  13  -1   5   27.60   35.40
  13  -1   5   12.20   28.30
 -12   1  -5   32.80   32.00
 -12   1  -5   13.50   41.90
  12  -1   5   35.80   33.50
  12  -1   5   44.20   27.00
 -11   1  -5   59.29   30.90
 -11   1  -5    4.80   39.20
  11  -1   5   22.00   24.60
  11  -1   5  -11.00   29.80
  11  -1   5   21.60   28.70
  11  -1   5   10.00   29.30
 -10   1  -5   94.49   32.20
 -10   1  -5   84.59   41.30
  10  -1   5   93.99   33.70
  10  -1   5   59.79   29.40
  10  -1   5   62.49   27.80
  -9   1  -5  -18.90   34.30
  -9   1  -5   -5.60   26.80
   9  -1   5  -27.00   28.00
   9  -1   5   24.70   23.00
   9  -1   5  -37.90   20.20
  -8   1  -5   35.30   26.40
  -8   1  -5   28.00   34.20
   8  -1   5   24.30   22.20
   8  -1   5   32.10   27.90
   8  -1   5   51.79   22.90
  -7   1  -5   47.90   33.20
  -7   1  -5   -5.70   26.60
   7  -1   5   66.99   26.90
   7  -1   5   14.50   20.90
   7  -1   5   44.90   20.30
  -6   1  -5   60.29   28.80
  -6   1  -5   18.60   17.80
  -6   1  -5   87.99   33.70
  -6   1  -5   53.29   23.70
   6  -1   5   69.79   21.20
   6  -1   5   23.40   19.80
  -5   1  -5  423.66   53.19
  -5   1  -5  463.55   56.19
  -5   1  -5  400.46   49.20
  -5   1  -5  401.16   48.70
  -5   1  -5  330.37   41.90
   5  -1   5  480.45   50.69
   5  -1   5  445.06   48.50
   5  -1   5  417.26   48.40
   5  -1   5  383.76   44.10
  -4   1  -5  176.08   31.50
  -4   1  -5  135.29   20.40
  -4   1  -5  148.09   26.70
  -4   1  -5  159.08   27.10
  -4   1  -5  185.88   33.80
   4  -1   5  188.08   25.80
   4  -1   5  141.49   25.80
   4  -1   5  170.88   30.20
  -3   1  -5  567.24   61.59
  -3   1  -5  501.85   58.19
  -3   1  -5  505.25   62.59
  -3   1  -5  575.44   61.49
  -3   1  -5  491.05   64.19
   3  -1   5  573.64   61.39
   3  -1   5  566.74   60.99
   3  -1   5  566.44   60.19
  -2   1  -5  646.94   71.89
  -2   1  -5  711.23   74.29
  -2   1  -5  702.23   74.19
  -2   1  -5  701.23   76.69
   2  -1   5  713.13   73.09
   2  -1   5  631.84   72.99
   2  -1   5  641.04   72.49
  -1   1  -5  397.86   50.59
  -1   1  -5  492.75   52.49
  -1   1  -5  443.36   54.29
  -1   1  -5  471.45   50.29
   1  -1   5  408.46   49.30
   1  -1   5  440.66   52.29
   1  -1   5  488.95   52.99
   0   1  -5   95.69   23.60
   0   1  -5  151.78   20.90
   0   1  -5  131.89   28.50
   0  -1   5  159.78   25.70
   0  -1   5  125.09   23.20
   0  -1   5  184.98   25.70
   0  -1   5  169.68   20.20
   1   1  -5  447.16   54.99
   1   1  -5  422.16   54.89
   1   1  -5  442.76   54.59
  -1  -1   5  537.85   54.29
  -1  -1   5  520.55   54.09
  -1  -1   5  489.25   54.69
   2   1  -5  707.83   74.69
   2   1  -5  695.23   73.69
   2   1  -5  612.94   73.19
   2   1  -5  698.23   75.49
  -2  -1   5  654.53   72.99
  -2  -1   5  705.63   73.29
   3   1  -5  618.34   66.89
   3   1  -5  611.14   64.99
   3   1  -5  573.84   67.89
  -3  -1   5  560.94   64.89
  -3  -1   5  590.54   61.89
  -3  -1   5  567.24   64.89
  -3  -1   5  597.14   64.09
   4   1  -5  184.38   33.10
   4   1  -5  204.18   28.60
   4   1  -5  152.38   29.60
   4   1  -5  209.08   28.80
  -4  -1   5  237.08   28.80
  -4  -1   5  237.28   32.60
  -4  -1   5  216.78   27.50
   5   1  -5  443.66   51.29
   5   1  -5  423.56   46.40
   5   1  -5  337.87   47.50
   5   1  -5  430.56   46.80
  -5  -1   5  422.26   46.10
  -5  -1   5  407.56   49.90
  -5  -1   5  356.86   45.00
  -5  -1   5  332.97   43.50
   6   1  -5   27.70   18.80
   6   1  -5   42.00   26.40
   6   1  -5   28.60   24.50
   6   1  -5   31.00   21.00
   6   1  -5   66.59   21.30
  -6  -1   5   53.09   22.20
  -6  -1   5   43.30   22.00
  -6  -1   5   69.49   17.50
   7   1  -5   48.50   21.60
   7   1  -5   41.10   28.90
   7   1  -5   10.80   19.20
   7   1  -5   15.70   23.30
   7   1  -5   42.10   18.70
  -7  -1   5   19.70   16.50
  -7  -1   5   33.10   22.80
  -7  -1   5   17.70   16.60
   8   1  -5   85.49   31.30
   8   1  -5   78.89   27.00
   8   1  -5   48.60   21.90
  -8  -1   5   35.70   17.20
  -8  -1   5  -27.10   22.80
  -8  -1   5   21.30   15.90
   9   1  -5   24.20   30.50
   9   1  -5   37.80   28.00
   9   1  -5  -31.50   20.70
  -9  -1   5   10.00   13.60
  -9  -1   5  -54.59   24.00
  -9  -1   5    3.10   16.70
  10   1  -5   91.19   32.10
  10   1  -5   70.29   35.10
  10   1  -5   84.89   27.00
 -10  -1   5   40.50   30.40
 -10  -1   5  109.19   22.30
 -10  -1   5   54.99   15.60
  11   1  -5  -11.00   23.60
  11   1  -5   37.90   37.90
  11   1  -5   31.90   30.90
 -11  -1   5   40.60   14.20
 -11  -1   5  -32.00   18.40
 -11  -1   5  -26.00   27.60
  12   1  -5   -6.90   32.20
  12   1  -5    5.10   25.40
  12   1  -5   65.69   37.80
 -12  -1   5   -3.60   13.20
 -12  -1   5   35.60   33.60
  13   1  -5   77.89   36.70
  13   1  -5   22.50   27.40
  13   1  -5   86.59   41.70
 -13  -1   5    8.80   37.70
  14   1  -5   85.19   31.50
  14   1  -5    2.10   43.20
  14   1  -5   35.40   36.00
 -14  -1   5   55.19   41.00
  15   1  -5    7.40   31.80
  15   1  -5  -34.70   36.50
  15   1  -5   43.10   47.20
 -15  -1   5  124.59   49.00
  16   1  -5   50.99   44.20
  16   1  -5   77.09   50.79
 -16  -1   5   -4.90   44.10
  17   1  -5  -33.00   47.50
  17   1  -5   25.30   45.50
 -17  -1   5    3.50   50.09
  18   1  -5  -90.09   56.09
  18   1  -5    3.20   49.60
 -18  -1   5  210.38   66.99
  19   1  -5  -46.90   55.69
  19   1  -5  100.39   76.19
 -19  -1   5  137.89   69.09
 -19   1  -4  -80.29   77.59
  19  -1   4   12.30   43.50
  19  -1   4 -104.99   60.19
 -18   1  -4   22.50   71.59
  18  -1   4   -4.10   56.59
  18  -1   4  -15.80   38.60
 -17   1  -4   84.69   62.99
  17  -1   4  -28.10   33.40
  17  -1   4   19.80   49.10
 -16   1  -4   83.89   44.70
 -16   1  -4   -7.60   56.09
  16  -1   4   42.80   34.30
  16  -1   4  -68.09   37.60
 -15   1  -4    4.90   49.50
 -15   1  -4   27.50   31.70
  15  -1   4   22.80   41.00
  15  -1   4   59.49   34.20
 -14   1  -4   28.20   48.40
 -14   1  -4   24.90   31.70
  14  -1   4   40.40   39.80
  14  -1   4   45.50   30.00
 -13   1  -4  -30.70   43.60
 -13   1  -4   38.20   30.40
  13  -1   4    4.50   34.90
  13  -1   4   42.20   28.60
 -12   1  -4  -74.99   37.70
 -12   1  -4   45.10   30.00
  12  -1   4  -21.10   25.20
  12  -1   4   69.39   37.50
 -11   1  -4   28.30   41.40
 -11   1  -4  116.79   31.60
  11  -1   4   19.10   31.20
  11  -1   4    4.10   24.50
 -10   1  -4   22.10   36.20
 -10   1  -4   45.80   28.20
  10  -1   4   -1.00   28.20
  10  -1   4   26.90   27.20
  10  -1   4    8.50   24.20
  10  -1   4  -40.20   21.40
  -9   1  -4    8.60   35.90
  -9   1  -4   31.50   26.40
   9  -1   4   25.50   22.50
   9  -1   4   30.50   29.10
   9  -1   4   41.40   25.50
  -8   1  -4   88.09   28.60
  -8   1  -4  132.59   38.00
   8  -1   4   16.00   22.60
   8  -1   4   59.49   27.80
   8  -1   4   45.50   22.50
  -7   1  -4  -28.50   30.00
  -7   1  -4   22.00   25.70
  -7   1  -4    8.20   22.60
   7  -1   4   36.80   20.90
   7  -1   4   43.40   26.80
   7  -1   4   56.79   20.90
  -6   1  -4 1010.00  111.29
  -6   1  -4 1075.59  109.59
  -6   1  -4  931.81  112.39
   6  -1   4 1068.59  108.79
   6  -1   4  970.00  110.89
   6  -1   4 1021.00  108.49
  -5   1  -4  499.05   63.49
  -5   1  -4  513.85   66.59
  -5   1  -4  638.44   63.09
  -5   1  -4  532.65   67.19
   5  -1   4  554.34   64.49
   5  -1   4  561.54   62.59
   5  -1   4  551.14   62.79
  -4   1  -4  253.87   33.30
  -4   1  -4  213.08   26.70
  -4   1  -4  213.88   32.90
  -4   1  -4  248.58   38.80
  -4   1  -4  213.98   36.90
   4  -1   4  254.97   32.40
   4  -1   4  258.17   35.10
   4  -1   4  231.08   33.70
   4  -1   4  265.57   29.30
   4  -1   4  268.07   32.90
  -3   1  -4  539.45   64.29
  -3   1  -4  621.94   68.09
  -3   1  -4  622.54   69.49
  -3   1  -4  659.13   67.89
  -3   1  -4  653.33   70.49
   3  -1   4  695.93   68.29
   3  -1   4  592.14   67.99
   3  -1   4  620.84   67.29
   3  -1   4  612.74   66.89
  -2   1  -4 1612.24  164.18
  -2   1  -4 1450.15  166.48
  -2   1  -4 1636.14  165.28
  -2   1  -4 1747.63  165.98
   2  -1   4 1560.64  164.98
   2  -1   4 1565.94  164.78
   2  -1   4 1806.82  165.58
   2  -1   4 1457.25  164.98
  -1   1  -4 1335.67  138.59
  -1   1  -4 1344.47  138.09
  -1   1  -4 1230.88  139.59
  -1   1  -4 1382.46  137.99
   1  -1   4 1302.17  137.69
   1  -1   4 1464.65  139.39
   1  -1   4 1317.07  138.49
   0   1  -4 1989.20  207.48
   0   1  -4 1955.70  206.78
   0   1  -4 1988.00  205.38
   0  -1   4 2261.67  206.88
   0  -1   4 1939.71  205.18
   0  -1   4 1974.80  206.88
   0  -1   4 2088.29  207.28
   1   1  -4 1450.15  146.49
   1   1  -4 1426.46  146.79
   1   1  -4 1371.66  146.49
  -1  -1   4 1391.06  145.99
  -1  -1   4 1444.66  146.19
   2   1  -4 1625.94  165.98
   2   1  -4 1655.83  166.58
   2   1  -4 1662.63  167.28
   2   1  -4 1485.25  165.48
  -2  -1   4 1589.94  166.28
  -2  -1   4 1578.14  163.78
  -2  -1   4 1748.82  166.68
  -2  -1   4 1615.54  165.28
   3   1  -4  627.34   68.89
   3   1  -4  596.94   66.79
   3   1  -4  624.24   67.79
   3   1  -4  675.53   71.19
  -3  -1   4  624.94   67.19
  -3  -1   4  649.83   69.49
  -3  -1   4  712.43   70.29
  -3  -1   4  601.94   66.69
  -3  -1   4  646.64   68.59
   4   1  -4  270.17   36.80
   4   1  -4  251.67   31.10
   4   1  -4  279.37   34.40
   4   1  -4  211.88   34.50
   4   1  -4  284.37   33.10
  -4  -1   4  221.48   29.10
  -4  -1   4  295.47   33.00
  -4  -1   4  203.08   30.00
  -4  -1   4  219.98   33.20
   5   1  -4  483.65   60.29
   5   1  -4  526.45   59.59
   5   1  -4  580.44   58.99
   5   1  -4  463.95   63.09
   5   1  -4  567.64   62.69
  -5  -1   4  454.15   60.79
  -5  -1   4  563.94   59.79
  -5  -1   4  560.04   61.99
  -5  -1   4  530.05   57.89
   6   1  -4  987.70  110.59
   6   1  -4  958.50  110.29
   6   1  -4 1052.39  113.19
   6   1  -4 1005.90  113.19
   6   1  -4 1106.99  109.29
  -6  -1   4 1047.00  108.49
  -6  -1   4 1028.50  110.99
  -6  -1   4 1094.09  107.89
  -6  -1   4  999.00  110.39
   7   1  -4   20.10   18.40
   7   1  -4    8.00   18.30
   7   1  -4   48.10   24.40
   7   1  -4   57.99   27.10
  -7  -1   4   36.20   16.30
  -7  -1   4   55.69   20.90
  -7  -1   4  -46.20   21.30
  -7  -1   4   49.20   15.40
   8   1  -4   17.30   24.70
   8   1  -4   35.90   19.90
   8   1  -4  134.59   32.60
  -8  -1   4   59.59   14.90
  -8  -1   4   52.89   17.90
  -8  -1   4   49.90   21.70
  -8  -1   4   -1.70   23.90
   9   1  -4   49.30   22.60
   9   1  -4  113.59   30.40
   9   1  -4  113.49   33.40
  -9  -1   4   55.19   15.30
  -9  -1   4   63.79   20.60
  -9  -1   4   32.70   26.90
  10   1  -4   31.10   28.40
  10   1  -4   66.99   34.70
  10   1  -4   46.80   23.00
 -10  -1   4    7.20   27.70
 -10  -1   4  -19.70   18.10
  11   1  -4   46.40   25.30
  11   1  -4   50.99   31.80
  11   1  -4   77.49   36.50
 -11  -1   4  186.18   37.80
 -11  -1   4   77.89   17.20
 -11  -1   4   72.19   23.50
  12   1  -4   50.99   37.70
  12   1  -4   32.70   25.70
  12   1  -4   16.70   31.40
 -12  -1   4  -37.70   13.40
 -12  -1   4    4.40   31.90
 -12  -1   4   13.90   25.50
  13   1  -4   52.89   34.50
  13   1  -4    0.30   41.80
  13   1  -4   -3.80   25.50
 -13  -1   4   44.70   37.80
  14   1  -4   16.50   40.80
  14   1  -4   -0.50   35.60
  14   1  -4   26.70   29.30
 -14  -1   4   37.10   39.40
  15   1  -4  -94.49   41.70
  15   1  -4  -11.50   35.50
  15   1  -4  -44.50   26.80
 -15  -1   4   30.90   43.60
  16   1  -4   72.99   49.10
  16   1  -4   37.80   40.40
 -16  -1   4   76.19   48.30
  17   1  -4   94.29   52.49
  17   1  -4    2.80   40.60
 -17  -1   4   66.49   54.39
  18   1  -4   26.50   48.20
  18   1  -4   61.39   59.09
 -18  -1   4   77.99   57.89
  19   1  -4  147.09   68.29
  19   1  -4  -28.10   53.19
 -19  -1   4   21.90   69.19
 -19   1  -3  -34.50   73.79
  19  -1   3    2.60   42.00
  19  -1   3  -61.79   62.09
 -18   1  -3   -6.90   64.89
  18  -1   3    4.70   38.00
  18  -1   3   -1.20   51.29
 -17   1  -3  -16.00   59.29
  17  -1   3   -7.00   35.10
  17  -1   3   41.20   44.30
 -16   1  -3  -15.10   50.29
  16  -1   3  -38.70   30.70
  16  -1   3   38.20   41.70
 -15   1  -3   30.40   29.30
 -15   1  -3  -24.30   47.70
  15  -1   3   16.70   41.60
  15  -1   3   14.70   31.20
 -14   1  -3   39.10   29.50
 -14   1  -3   39.00   42.10
  14  -1   3   18.80   29.80
  14  -1   3   62.49   42.00
 -13   1  -3    8.70   26.40
 -13   1  -3    2.50   43.50
  13  -1   3   16.90   26.90
  13  -1   3  -27.50   32.90
 -12   1  -3   62.59   28.30
 -12   1  -3   21.50   41.60
  12  -1   3   32.00   27.70
  12  -1   3   -3.70   32.80
 -11   1  -3  130.79   30.20
 -11   1  -3    1.90   39.70
  11  -1   3   64.29   27.10
  11  -1   3  111.59   37.30
 -10   1  -3   72.49   36.40
 -10   1  -3  113.49   29.20
  10  -1   3  113.39   29.00
  10  -1   3   52.79   25.60
  10  -1   3   49.50   31.70
  -9   1  -3   28.80   25.00
  -9   1  -3   -6.10   33.30
   9  -1   3   12.90   21.80
   9  -1   3    8.00   22.70
   9  -1   3   39.00   27.50
  -8   1  -3   12.90   28.70
  -8   1  -3   33.20   23.10
   8  -1   3  -15.70   21.40
   8  -1   3   21.40   22.00
   8  -1   3   -0.70   26.40
  -7   1  -3   15.60   31.40
  -7   1  -3   40.10   23.30
  -7   1  -3   57.29   24.60
   7  -1   3   -1.60   17.00
   7  -1   3   66.69   26.70
   7  -1   3   35.40   22.20
   7  -1   3    5.20   21.00
  -6   1  -3  -23.00   15.80
  -6   1  -3   30.90   23.10
  -6   1  -3   31.70   26.00
  -6   1  -3    7.30   21.30
   6  -1   3   -6.10   18.40
   6  -1   3   -1.20   18.40
   6  -1   3   -6.00   24.70
   6  -1   3   15.70   18.90
  -5   1  -3  348.27   45.20
  -5   1  -3  367.76   51.49
  -5   1  -3  391.16   47.80
  -5   1  -3  363.16   44.40
   5  -1   3  350.76   47.90
   5  -1   3  371.06   44.60
   5  -1   3  362.26   45.00
   5  -1   3  328.37   46.70
   5  -1   3  350.96   45.00
  -4   1  -3  462.65   54.49
  -4   1  -3  446.66   56.19
  -4   1  -3  487.85   57.99
  -4   1  -3  504.65   55.09
   4  -1   3  455.75   54.19
   4  -1   3  461.15   54.19
   4  -1   3  496.55   54.79
   4  -1   3  470.75   55.89
  -3   1  -3 1261.57  140.59
  -3   1  -3 1258.37  140.39
  -3   1  -3 1278.47  138.89
  -3   1  -3 1344.97  139.29
   3  -1   3 1476.75  140.49
   3  -1   3 1363.76  139.09
   3  -1   3 1446.76  140.09
   3  -1   3 1359.56  137.29
   3  -1   3 1306.07  138.79
  -2   1  -3 1104.79  124.59
  -2   1  -3 1202.58  125.29
  -2   1  -3 1259.77  125.89
  -2   1  -3 1192.68  126.39
   2  -1   3 1124.79  124.79
   2  -1   3 1126.79  124.49
   2  -1   3 1255.87  125.79
   2  -1   3 1263.27  124.19
   2  -1   3 1361.06  125.79
  -1   1  -3  344.67   40.40
  -1   1  -3  316.77   38.20
  -1   1  -3  340.57   38.00
   1  -1   3  356.86   37.90
   1  -1   3  335.37   37.80
   1  -1   3  292.27   37.90
   0   1  -3 1520.35  157.78
   0   1  -3 1543.55  158.78
   0   1  -3 1590.64  159.38
   0   1  -3 1608.84  159.08
   0  -1   3 1507.85  157.78
   0  -1   3 1618.24  158.68
   0  -1   3 1510.55  159.18
   1   1  -3  318.77   38.00
   1   1  -3  333.87   37.20
   1   1  -3  333.47   37.90
  -1  -1   3  300.67   37.00
  -1  -1   3  325.17   36.80
   2   1  -3 1215.08  122.59
   2   1  -3 1253.27  123.79
   2   1  -3 1154.28  123.79
   2   1  -3 1140.29  121.59
  -2  -1   3 1114.39  123.59
  -2  -1   3 1217.78  123.29
  -2  -1   3 1158.18  123.79
  -2  -1   3 1202.98  121.59
  -2  -1   3 1246.18  122.19
   3   1  -3 1339.17  135.19
   3   1  -3 1188.78  134.79
   3   1  -3 1272.27  132.79
   3   1  -3 1324.87  134.19
   3   1  -3 1258.07  133.19
  -3  -1   3 1337.47  134.09
  -3  -1   3 1377.66  134.59
  -3  -1   3 1288.17  132.09
  -3  -1   3 1283.77  132.99
  -3  -1   3 1355.16  134.99
  -3  -1   3 1235.08  132.59
   4   1  -3  472.05   58.99
   4   1  -3  462.45   57.79
   4   1  -3  520.15   56.29
   4   1  -3  553.44   56.49
   4   1  -3  493.65   54.69
  -4  -1   3  511.55   56.99
  -4  -1   3  466.95   53.59
  -4  -1   3  464.55   57.89
  -4  -1   3  529.15   55.89
   5   1  -3  415.56   47.50
   5   1  -3  334.07   42.60
   5   1  -3  323.87   41.80
   5   1  -3  311.97   43.80
   5   1  -3  360.76   40.70
  -5  -1   3  351.96   42.50
  -5  -1   3  421.86   45.10
  -5  -1   3  297.37   39.00
  -5  -1   3  379.56   39.80
  -5  -1   3  262.67   41.20
   6   1  -3   16.60   26.50
   6   1  -3   28.60   17.20
   6   1  -3    1.10   20.20
   6   1  -3   43.10   20.50
  -6  -1   3   12.20   13.00
  -6  -1   3  -11.50   20.30
  -6  -1   3   32.20   18.00
  -6  -1   3   36.20   15.10
   7   1  -3   34.50   18.10
   7   1  -3   55.89   27.00
   7   1  -3   19.20   22.00
   7   1  -3   31.70   22.10
  -7  -1   3   50.29   17.30
  -7  -1   3   16.70   18.90
  -7  -1   3  -13.20   22.90
  -7  -1   3   25.70   12.90
   8   1  -3  -13.50   22.10
   8   1  -3  -14.40   16.80
   8   1  -3    2.00   26.10
  -8  -1   3   18.10   22.80
  -8  -1   3  -13.20   12.20
  -8  -1   3  -10.10   18.90
  -8  -1   3   -2.20   16.10
   9   1  -3  -17.20   26.70
   9   1  -3   45.80   25.80
   9   1  -3   12.10   18.80
  -9  -1   3  -21.00   19.50
  -9  -1   3   10.10   25.00
  -9  -1   3    5.10   17.50
  -9  -1   3   18.50   13.10
  10   1  -3   74.29   23.70
  10   1  -3   80.99   33.00
  10   1  -3   82.49   29.70
 -10  -1   3   38.80   16.20
 -10  -1   3   55.99   24.40
 -10  -1   3  138.99   32.70
 -10  -1   3   91.29   22.20
  11   1  -3  -26.00   26.50
  11   1  -3    0.90   20.40
  11   1  -3    7.00   32.10
 -11  -1   3  -27.70   13.60
 -11  -1   3   61.89   33.00
 -11  -1   3   26.90   20.40
 -11  -1   3   48.70   25.00
  12   1  -3   37.70   31.50
  12   1  -3   36.50   24.20
  12   1  -3   47.70   37.90
 -12  -1   3   13.80   23.90
 -12  -1   3   26.90   15.80
 -12  -1   3   54.09   34.30
  13   1  -3   72.59   38.50
  13   1  -3   32.20   25.30
  13   1  -3   -4.20   31.10
 -13  -1   3  -16.90   14.00
 -13  -1   3   -8.60   34.90
  14   1  -3   82.29   38.10
  14   1  -3  101.39   44.10
  14   1  -3   36.90   27.90
 -14  -1   3   64.79   46.30
  15   1  -3  -20.90   26.20
  15   1  -3   72.09   38.40
 -15  -1   3   24.30   45.70
  16   1  -3  -25.30   36.80
  16   1  -3   20.20   43.70
 -16  -1   3   89.59   52.79
  17   1  -3   28.30   46.40
  17   1  -3   28.10   41.50
 -17  -1   3  105.19   56.09
  18   1  -3  -36.60   57.69
  18   1  -3  -87.59   40.60
 -18  -1   3  -32.20   60.59
  19   1  -3  -18.80   48.50
  19   1  -3   20.00   67.79
 -19  -1   3   10.30   66.59
 -19   1  -2  103.89   78.79
  19  -1   2  126.79   47.40
  19  -1   2 -100.89   55.09
 -18   1  -2  -15.20   62.89
  18  -1   2   98.19   57.49
  18  -1   2  -21.70   37.20
 -17   1  -2   27.50   54.09
  17  -1   2   80.69   47.60
  17  -1   2  -22.00   34.50
 -16   1  -2  -29.30   50.49
  16  -1   2   -5.40   32.60
  16  -1   2  -69.39   39.90
 -15   1  -2   69.39   50.99
 -15   1  -2   54.79   29.70
  15  -1   2   21.30   33.10
  15  -1   2   25.20   44.00
 -14   1  -2  -17.70   26.40
 -14   1  -2   46.30   45.90
  14  -1   2    9.80   30.30
  14  -1   2  -30.60   37.50
 -13   1  -2   48.20   27.50
 -13   1  -2  -69.49   39.00
  13  -1   2   15.40   37.00
  13  -1   2  -12.00   27.60
 -12   1  -2   33.50   26.50
 -12   1  -2    9.30   37.30
  12  -1   2   33.40   27.20
  12  -1   2   44.30   36.80
 -11   1  -2    2.70   37.70
 -11   1  -2   51.89   25.40
  11  -1   2    5.60   24.20
  11  -1   2   -0.20   30.70
 -10   1  -2   77.49   25.60
 -10   1  -2   36.30   37.80
  10  -1   2   41.20   24.50
  10  -1   2  106.49   33.20
  -9   1  -2   69.99   25.50
  -9   1  -2   25.50   33.20
   9  -1   2   72.59   31.60
   9  -1   2   61.69   23.80
   9  -1   2   61.49   25.40
  -8   1  -2  392.16   54.39
  -8   1  -2  404.36   45.20
   8  -1   2  272.47   44.50
   8  -1   2  300.17   43.90
   8  -1   2  314.87   49.10
  -7   1  -2  260.27   38.80
  -7   1  -2  315.87   39.40
  -7   1  -2  319.47   47.10
   7  -1   2  247.28   37.10
   7  -1   2  226.88   37.40
   7  -1   2  236.08   40.80
   7  -1   2  251.07   37.90
  -6   1  -2  286.77   49.50
  -6   1  -2  388.06   46.70
  -6   1  -2  336.27   46.20
   6  -1   2  381.36   49.90
   6  -1   2  408.06   46.80
   6  -1   2  340.37   45.70
   6  -1   2  410.26   46.70
  -5   1  -2    0.50   17.50
  -5   1  -2   12.50   17.10
  -5   1  -2   40.80   20.80
  -5   1  -2   34.90   25.40
   5  -1   2   63.29   18.50
   5  -1   2   -1.70    8.30
   5  -1   2   32.20   18.00
   5  -1   2   44.20   19.20
   5  -1   2   -0.80   21.40
  -4   1  -2  270.77   37.90
  -4   1  -2  297.87   41.80
  -4   1  -2  311.47   40.10
  -4   1  -2  305.77   38.40
   4  -1   2  299.77   40.00
   4  -1   2  335.67   38.30
   4  -1   2  315.27   38.00
   4  -1   2  298.77   41.10
   4  -1   2  306.37   39.20
  -3   1  -2 1253.67  135.49
  -3   1  -2 1449.35  135.29
  -3   1  -2 1344.17  136.59
  -3   1  -2 1318.87  134.79
   3  -1   2 1292.77  135.19
   3  -1   2 1226.78  135.19
   3  -1   2 1339.47  134.79
   3  -1   2 1212.78  134.19
  -2   1  -2  632.74   62.29
  -2   1  -2  538.85   60.99
  -2   1  -2  506.35   60.19
  -2   1  -2  615.64   62.79
   2  -1   2  572.14   59.19
   2  -1   2  610.04   61.69
   2  -1   2  591.74   61.09
   2  -1   2  565.84   61.49
   2  -1   2  521.15   60.09
  -1   1  -2 1147.79  109.09
  -1   1  -2 1028.60  108.19
  -1   1  -2 1022.70  107.79
   1  -1   2 1149.78  108.39
   1  -1   2 1120.59  107.99
   1  -1   2  977.50  107.59
   1  -1   2  960.40  108.09
   0   1  -2  123.79   14.90
   0   1  -2   91.99   12.10
   0   1  -2   94.59   14.30
   0   1  -2   78.19   12.30
   0  -1   2  104.49   13.90
   0  -1   2   91.89   14.40
   0  -1   2   79.89   12.20
   1   1  -2 1034.70  107.59
   1   1  -2 1035.50  108.19
   1   1  -2 1028.50  106.99
  -1  -1   2 1065.19  108.09
  -1  -1   2 1125.39  106.99
  -1  -1   2 1039.90  108.49
  -1  -1   2 1035.60  107.59
   2   1  -2  425.46   55.79
   2   1  -2  567.64   56.49
   2   1  -2  530.85   53.69
   2   1  -2  524.35   54.49
   2   1  -2  567.84   55.29
  -2  -1   2  533.15   53.29
  -2  -1   2  495.35   55.29
  -2  -1   2  484.05   53.49
  -2  -1   2  508.45   54.59
  -2  -1   2  473.05   56.29
  -2  -1   2  523.35   56.39
   3   1  -2 1350.86  129.69
   3   1  -2 1233.98  128.19
   3   1  -2 1192.98  130.49
   3   1  -2 1209.98  130.29
   3   1  -2 1270.57  129.39
  -3  -1   2 1213.98  129.89
  -3  -1   2 1196.18  130.29
  -3  -1   2 1262.27  129.49
  -3  -1   2 1310.77  128.09
   4   1  -2  298.77   36.20
   4   1  -2  331.07   40.10
   4   1  -2  285.47   37.10
   4   1  -2  300.77   34.90
  -4  -1   2  213.78   31.50
  -4  -1   2  306.67   37.60
  -4  -1   2  368.56   38.90
  -4  -1   2  244.48   35.30
  -4  -1   2  310.67   35.30
  -4  -1   2  279.87   33.20
   5   1  -2   43.10   16.30
   5   1  -2   63.19   23.10
   5   1  -2   58.39   19.60
   5   1  -2    6.10   18.10
  -5  -1   2   -1.30   18.20
  -5  -1   2   40.30   13.60
  -5  -1   2   28.40   19.50
  -5  -1   2   -9.60   11.40
  -5  -1   2   50.39   16.60
  -5  -1   2    9.70   18.10
   6   1  -2  391.96   45.00
   6   1  -2  225.88   42.90
   6   1  -2  434.16   48.30
   6   1  -2  311.57   40.10
  -6  -1   2  381.46   46.30
  -6  -1   2  306.27   37.70
  -6  -1   2  359.46   43.10
  -6  -1   2  322.07   40.10
  -6  -1   2  381.26   57.59
   7   1  -2  301.97   40.30
   7   1  -2  345.37   43.90
   7   1  -2  229.18   33.80
  -7  -1   2  231.08   34.30
  -7  -1   2  235.28   31.80
  -7  -1   2  309.97   42.10
  -7  -1   2  305.17   36.10
   8   1  -2  297.17   40.70
   8   1  -2  461.85   51.19
   8   1  -2  322.97   46.70
  -8  -1   2  315.67   40.90
  -8  -1   2  286.57   38.10
  -8  -1   2  352.46   48.50
  -8  -1   2  361.06   42.40
   9   1  -2   43.20   19.80
   9   1  -2   91.89   27.50
   9   1  -2   94.39   31.40
  -9  -1   2   84.49   21.30
  -9  -1   2  139.39   32.00
  -9  -1   2   93.29   22.50
  -9  -1   2   18.60   15.20
  10   1  -2  106.29   33.20
  10   1  -2   51.09   20.50
  10   1  -2   54.89   27.20
 -10  -1   2   63.99   21.80
 -10  -1   2   28.20   20.60
 -10  -1   2   71.39   31.10
 -10  -1   2  -14.80   14.90
  11   1  -2  -21.50   27.00
  11   1  -2   87.29   32.80
  11   1  -2  -17.40   19.30
 -11  -1   2  -15.40   15.00
 -11  -1   2   96.69   34.50
 -11  -1   2   18.80   21.90
 -11  -1   2   14.00   21.30
  12   1  -2   -0.10   22.10
  12   1  -2   33.40   35.20
  12   1  -2   -6.70   30.10
 -12  -1   2  -13.10   22.80
 -12  -1   2   23.10   34.90
 -12  -1   2  -24.90   15.30
 -12  -1   2   27.00   34.70
  13   1  -2   22.80   23.40
  13   1  -2   16.40   36.20
  13   1  -2  -29.60   29.80
 -13  -1   2   18.30   38.90
 -13  -1   2    3.30   16.30
  14   1  -2  -47.60   31.10
  14   1  -2  -43.50   21.70
  14   1  -2  -87.89   34.40
 -14  -1   2   51.69   45.10
  15   1  -2   71.69   38.40
  15   1  -2   76.09   42.40
 -15  -1   2   58.39   47.50
  16   1  -2   29.10   42.60
  16   1  -2   31.00   38.20
 -16  -1   2   29.20   51.79
  17   1  -2  -44.90   38.80
  17   1  -2   32.90   49.10
 -17  -1   2  -22.10   50.09
  18   1  -2    3.20   55.89
  18   1  -2   -7.60   45.40
 -18  -1   2  -63.49   62.09
  19   1  -2   30.30   50.59
  19   1  -2   51.69   60.39
 -19  -1   2  -13.40   69.99
 -19   1  -1  -13.60   77.79
  19  -1   1  -55.39   61.29
  19  -1   1    2.20   45.00
 -18   1  -1 -103.59   58.29
  18  -1   1  -46.10   37.10
  18  -1   1  -39.40   50.79
 -17   1  -1   39.40   59.09
  17  -1   1   37.60   38.70
  17  -1   1   27.10   43.50
 -16   1  -1   49.30   52.69
  16  -1   1  -33.20   32.30
  16  -1   1   -5.10   43.50
 -15   1  -1   12.80   25.40
 -15   1  -1   55.59   48.20
  15  -1   1   16.10   41.70
  15  -1   1   -6.20   32.20
 -14   1  -1   52.09   27.10
 -14   1  -1  -36.90   43.50
  14  -1   1   96.39   39.00
  14  -1   1   -1.90   31.30
 -13   1  -1   29.20   25.70
 -13   1  -1  -11.90   42.20
  13  -1   1   10.60   33.60
  13  -1   1   -0.60   28.60
 -12   1  -1    0.10   39.10
 -12   1  -1   -7.90   23.60
  12  -1   1   26.60   34.20
  12  -1   1  -10.40   25.60
 -11   1  -1   12.90   38.00
 -11   1  -1   69.39   24.60
  11  -1   1    8.80   14.90
  11  -1   1   10.70   24.50
  11  -1   1   28.00   33.60
 -10   1  -1   83.99   24.60
 -10   1  -1  150.48   41.80
  10  -1   1   78.59   26.80
  10  -1   1   57.39   17.00
  10  -1   1   63.09   33.20
  -9   1  -1   63.59   30.60
  -9   1  -1   12.40   20.20
   9  -1   1    1.70   27.90
   9  -1   1   -5.20   18.00
   9  -1   1    5.20   13.20
   9  -1   1  -23.00   19.60
  -8   1  -1   35.50   19.90
  -8   1  -1   38.70   29.30
   8  -1   1   -9.60   19.00
   8  -1   1  -25.10   25.20
   8  -1   1    9.10   21.70
   8  -1   1   10.40   13.20
   8  -1   1    4.20   19.90
  -7   1  -1  324.17   40.10
  -7   1  -1  200.98   44.60
  -7   1  -1  266.77   41.40
   7  -1   1  333.97   40.80
   7  -1   1  282.97   40.80
   7  -1   1  281.07   39.90
   7  -1   1  359.56   46.30
   7  -1   1  295.77   34.70
  -6   1  -1  122.39   24.70
  -6   1  -1   10.30   23.10
  -6   1  -1  113.19   17.90
  -6   1  -1  138.89   30.50
  -6   1  -1  145.39   27.30
   6  -1   1  147.79   25.00
   6  -1   1  165.18   25.90
   6  -1   1  162.98   26.20
   6  -1   1  157.48   31.00
   6  -1   1  136.89   18.70
   6  -1   1  174.48   32.20
  -5   1  -1  219.18   25.90
  -5   1  -1  191.88   31.70
  -5   1  -1  193.18   32.20
  -5   1  -1  247.58   31.70
  -5   1  -1  275.97   40.20
   5  -1   1  212.28   30.80
   5  -1   1  238.88   32.80
   5  -1   1  229.48   26.70
   5  -1   1  233.58   32.30
   5  -1   1  226.48   35.50
  -4   1  -1  168.88   19.50
  -4   1  -1  124.39   25.40
  -4   1  -1  161.78   26.30
  -4   1  -1  159.48   29.30
  -4   1  -1  162.78   25.50
   4  -1   1  109.49   22.00
   4  -1   1  139.19   25.50
   4  -1   1  174.98   26.00
   4  -1   1  150.48   25.90
   4  -1   1  178.08   19.90
   4  -1   1  173.38   29.80
   4  -1   1  138.09   24.10
  -3   1  -1  131.99   24.70
  -3   1  -1  207.98   30.60
  -3   1  -1  161.78   24.30
  -3   1  -1   99.09   22.80
  -3   1  -1  165.48   19.20
   3  -1   1  163.48   24.70
   3  -1   1  149.69   23.30
   3  -1   1  201.48   24.60
   3  -1   1  204.98   28.10
  -2   1  -1   94.79   14.90
  -2   1  -1   61.59   12.90
  -2   1  -1   90.19   18.10
  -2   1  -1   51.49   15.40
   2  -1   1   75.99   15.50
   2  -1   1   47.00   12.70
   2  -1   1  139.79   17.20
   2  -1   1   99.79   15.10
   2  -1   1   60.39   16.80
  -1   1  -1  324.67   32.30
  -1   1  -1  316.87   32.30
  -1   1  -1  273.97   31.30
  -1   1  -1  279.37   32.50
  -1   1  -1  260.17   30.70
   1  -1   1  279.27   30.70
   1  -1   1  329.67   32.30
   1  -1   1  310.07   31.40
   1  -1   1  299.97   32.10
   0   1  -1   93.99   12.40
   0   1  -1   94.79   11.40
   0   1  -1   93.29   12.80
   0  -1   1  109.89   12.80
   0  -1   1  120.99   11.50
   1   1  -1  312.37   31.30
   1   1  -1  295.17   32.30
   1   1  -1  292.87   31.80
   1   1  -1  289.97   30.50
  -1  -1   1  290.97   30.50
  -1  -1   1  242.78   31.50
  -1  -1   1  321.47   31.30
  -1  -1   1  300.27   32.20
  -1  -1   1  288.47   31.60
   2   1  -1   43.60   15.50
   2   1  -1   89.69   14.40
   2   1  -1  138.89   16.00
   2   1  -1   65.89   15.20
  -2  -1   1  104.39   16.40
  -2  -1   1  104.79   14.70
  -2  -1   1   64.29   15.80
   3   1  -1  169.38   22.00
   3   1  -1  140.99   18.10
   3   1  -1  204.48   26.30
   3   1  -1  166.58   25.80
   3   1  -1  143.09   23.80
   3   1  -1  178.78   21.50
  -3  -1   1  165.28   25.70
  -3  -1   1  202.48   25.90
  -3  -1   1  152.18   21.70
  -3  -1   1  140.49   17.80
  -3  -1   1  135.19   22.40
  -3  -1   1  107.99   19.20
   4   1  -1  154.28   22.30
   4   1  -1  215.48   29.40
   4   1  -1  198.88   30.20
   4   1  -1  141.79   26.40
   4   1  -1  151.78   23.60
  -4  -1   1  204.68   29.50
  -4  -1   1  171.28   21.30
  -4  -1   1  183.28   24.30
  -4  -1   1  154.58   22.90
  -4  -1   1  181.68   28.70
  -4  -1   1  170.38   29.50
   5   1  -1  238.88   29.80
   5   1  -1  249.68   30.20
   5   1  -1  229.18   33.80
   5   1  -1  265.77   36.90
   5   1  -1  238.08   34.10
  -5  -1   1  252.47   35.90
  -5  -1   1  238.48   30.70
  -5  -1   1  214.88   28.30
  -5  -1   1  266.47   36.20
  -5  -1   1  235.78   35.10
   6   1  -1  156.98   30.20
   6   1  -1  103.29   18.70
   6   1  -1  145.89   20.40
   6   1  -1  117.49   25.10
   6   1  -1    7.40   21.00
  -6  -1   1  123.89   26.40
  -6  -1   1   61.89   17.20
  -6  -1   1  157.18   27.10
  -6  -1   1   88.59   26.90
  -6  -1   1  113.69   20.60
  -6  -1   1  175.78   28.90
   7   1  -1  332.57   44.20
   7   1  -1  322.27   37.20
   7   1  -1  327.37   42.10
   7   1  -1  292.37   36.10
  -7  -1   1  249.58   34.80
  -7  -1   1  346.87   37.20
  -7  -1   1  238.88   37.30
  -7  -1   1  249.18   42.70
   8   1  -1    8.10   25.10
   8   1  -1   27.80   22.10
   8   1  -1   10.40   15.30
   8   1  -1  -13.10   16.80
  -8  -1   1    4.80   17.00
  -8  -1   1    7.00   19.30
  -8  -1   1   61.29   26.90
  -8  -1   1  -21.80   13.20
   9   1  -1  -48.30   24.90
   9   1  -1  -23.20   21.10
   9   1  -1   -8.80   17.20
   9   1  -1   -9.90   15.10
  -9  -1   1   -3.40   27.30
  -9  -1   1  -21.90   13.60
  -9  -1   1   -1.80   17.70
  -9  -1   1    9.40   19.50
  10   1  -1  118.89   33.90
  10   1  -1   51.79   19.30
  10   1  -1   85.09   28.00
  10   1  -1   95.59   21.80
 -10  -1   1   48.90   22.70
 -10  -1   1   88.39   32.80
 -10  -1   1   40.70   18.10
 -10  -1   1   29.40   21.40
  11   1  -1   19.80   27.10
  11   1  -1  -15.20   17.40
  11   1  -1   63.89   33.40
 -11  -1   1   35.40   22.80
 -11  -1   1   29.80   17.60
 -11  -1   1   40.90   33.60
 -11  -1   1  -14.70   20.00
  12   1  -1   55.29   34.70
  12   1  -1   35.20   29.40
  12   1  -1   -0.10   20.10
 -12  -1   1   33.40   22.70
 -12  -1   1   58.49   19.30
 -12  -1   1   49.70   38.20
  13   1  -1   36.00   21.60
  13   1  -1  -19.00   35.10
  13   1  -1  -14.70   30.40
 -13  -1   1   43.90   19.10
 -13  -1   1   24.40   40.00
  14   1  -1   -2.10   31.40
  14   1  -1   24.30   23.20
  14   1  -1   23.20   37.00
 -14  -1   1   25.80   42.00
  15   1  -1    6.90   33.70
  15   1  -1   -8.90   38.00
 -15  -1   1  -10.70   45.90
  16   1  -1   15.70   42.40
  16   1  -1   19.30   36.10
 -16  -1   1   69.89   56.09
  17   1  -1  -66.19   34.10
  17   1  -1   42.30   47.90
 -17  -1   1  122.89   59.39
  18   1  -1   -9.90   44.00
  18   1  -1   75.49   51.59
 -18  -1   1  -12.20   65.89
  19   1  -1   45.20   61.99
  19   1  -1  -93.39   42.90
 -19  -1   1  -76.09   68.59
 -19   1   0    4.20   72.99
  19  -1   0   15.80   48.20
  19  -1   0    7.30   61.69
 -18   1   0   93.89   69.99
  18  -1   0   -8.90   39.40
  18  -1   0   71.09   52.69
 -17   1   0   87.39   57.89
  17  -1   0  -78.29   36.00
  17  -1   0   43.90   45.70
 -16   1   0    9.80   49.00
  16  -1   0   52.49   37.90
  16  -1   0  -56.49   38.80
 -15   1   0   23.60   34.00
 -15   1   0  -72.89   41.70
  15  -1   0    1.40   39.90
  15  -1   0  -47.10   31.00
 -14   1   0   14.70   24.30
 -14   1   0   79.69   45.10
  14  -1   0   22.60   36.80
  14  -1   0  -23.30   29.50
 -13   1   0  147.79   31.10
 -13   1   0  148.09   48.70
  13  -1   0  115.69   37.20
  13  -1   0  116.19   26.60
  13  -1   0  192.88   45.50
 -12   1   0    8.60   22.80
 -12   1   0   22.20   39.80
  12  -1   0   -2.70   28.20
  12  -1   0  -19.20   32.00
  12  -1   0   49.60   20.30
 -11   1   0   87.69   40.80
 -11   1   0   90.59   24.80
  11  -1   0   79.09   21.50
  11  -1   0   41.40   27.80
  11  -1   0   83.29   36.50
 -10   1   0  182.78   29.10
 -10   1   0  102.79   40.20
  10  -1   0  129.79   25.00
  10  -1   0  126.59   31.40
  10  -1   0  178.48   38.60
  -9   1   0  104.49   23.80
  -9   1   0  126.39   35.60
   9  -1   0   60.09   19.40
   9  -1   0   87.49   26.60
   9  -1   0  128.89   26.60
   9  -1   0  109.69   33.50
  -8   1   0   17.10   28.20
   8  -1   0   30.70   15.50
   8  -1   0   37.00   28.30
   8  -1   0   -2.70   19.40
   8  -1   0   21.80   20.90
  -7   1   0  -22.80   17.10
  -7   1   0  -57.29   18.90
  -7   1   0   -4.80   26.40
  -7   1   0   19.40   13.30
   7  -1   0   12.80   19.70
   7  -1   0   12.10   21.40
   7  -1   0   10.40   27.30
   7  -1   0    1.30   13.90
   7  -1   0   28.80   19.40
  -6   1   0  413.66   60.79
  -6   1   0  525.85   61.09
  -6   1   0  517.15   58.09
  -6   1   0  574.84   65.49
  -6   1   0  548.25   62.29
   6  -1   0  612.64   62.89
   6  -1   0  562.74   62.19
   6  -1   0  612.34   58.79
   6  -1   0  545.85   65.69
   6  -1   0  527.15   62.89
  -5   1   0  669.53   76.69
  -5   1   0  695.13   75.69
  -5   1   0  693.93   78.69
  -5   1   0  577.84   75.49
  -5   1   0  749.03   73.39
   5  -1   0  680.43   76.59
   5  -1   0  685.33   76.49
   5  -1   0  766.92   73.69
   5  -1   0  713.23   78.89
   5  -1   0  700.03   77.19
   5  -1   0  715.93   76.59
  -4   1   0  148.99   27.60
  -4   1   0  191.68   28.50
  -4   1   0  159.78   28.00
  -4   1   0  204.58   24.70
  -4   1   0  214.88   32.10
   4  -1   0  222.08   29.90
   4  -1   0  222.78   25.90
   4  -1   0  283.27   33.40
   4  -1   0  208.78   29.50
   4  -1   0  182.58   27.90
   4  -1   0  207.38   32.90
  -3   1   0  208.58   22.80
  -3   1   0  239.58   25.50
  -3   1   0  162.98   23.90
  -3   1   0   93.39   23.80
  -3   1   0  191.78   29.40
  -3   1   0  132.99   25.10
   3  -1   0  215.58   26.40
   3  -1   0  245.38   29.90
   3  -1   0  172.88   26.50
   3  -1   0  181.58   24.60
   3  -1   0  206.68   28.90
   3  -1   0  196.98   22.50
  -2   1   0  131.89   19.40
  -2   1   0  116.99   14.30
  -2   1   0   99.19   15.40
  -2   1   0   93.39   17.70
  -2   1   0  111.19   18.10
   2  -1   0  103.19   15.30
   2  -1   0  113.59   17.30
   2  -1   0   86.59   17.10
   2  -1   0  130.09   14.60
   2  -1   0  112.09   17.00
   2  -1   0  106.79   18.60
  -1   1   0 1554.04  165.88
  -1   1   0 1782.02  165.98
  -1   1   0 1424.36  166.18
   1  -1   0 1682.53  166.28
   1  -1   0 1701.43  165.98
   1  -1   0 1626.24  166.28
   1  -1   0 1692.43  165.98
   0   1   0    2.20    2.70
   0   1   0   -3.60    3.10
   0   1   0   -3.90    4.60
   0  -1   0   -5.40    4.70
   0  -1   0   -1.00    0.60
   0  -1   0   -1.70    2.50
   1   1   0 1612.54  159.38
   1   1   0 1580.84  159.18
   1   1   0 1554.04  159.08
  -1  -1   0 1587.24  159.18
  -1  -1   0 1641.54  159.38
  -1  -1   0 1442.86  158.98
   2   1   0  103.19   15.00
   2   1   0  121.19   13.80
   2   1   0  139.89   18.60
   2   1   0   98.39   17.20
   2   1   0   98.39   17.40
  -2  -1   0   71.79   17.50
  -2  -1   0  164.68   19.50
  -2  -1   0  103.09   15.20
  -2  -1   0  110.19   13.80
  -2  -1   0   84.09   17.30
   3   1   0  190.88   23.10
   3   1   0  194.98   23.30
   3   1   0  182.58   27.80
   3   1   0  194.58   28.20
   3   1   0  202.58   28.20
  -3  -1   0  207.78   28.90
  -3  -1   0  228.78   29.50
  -3  -1   0  149.99   27.60
  -3  -1   0  195.88   23.80
  -3  -1   0  165.48   22.60
   4   1   0  179.28   24.40
   4   1   0  192.98   24.80
   4   1   0  192.48   29.80
   4   1   0  228.58   26.00
   4   1   0  220.18   33.00
   4   1   0  225.98   31.80
  -4  -1   0  224.38   31.90
  -4  -1   0  193.38   32.20
  -4  -1   0  189.18   25.80
  -4  -1   0  203.88   30.90
  -4  -1   0  187.68   24.90
  -4  -1   0  198.78   29.50
   5   1   0  663.03   78.19
   5   1   0  802.32   79.49
   5   1   0  727.63   75.79
   5   1   0  778.62   80.49
   5   1   0  746.13   74.79
  -5  -1   0  680.43   75.79
  -5  -1   0  693.13   79.19
  -5  -1   0  767.62   79.69
  -5  -1   0  639.24   74.89
  -5  -1   0  649.54   78.19
  -5  -1   0  769.52   77.99
   6   1   0  573.54   68.49
   6   1   0  590.74   66.49
   6   1   0  570.74   62.69
   6   1   0  565.24   61.09
  -6  -1   0  563.54   66.99
  -6  -1   0  553.74   67.39
  -6  -1   0  560.74   61.69
  -6  -1   0  592.24   62.59
   7   1   0   10.30   12.60
   7   1   0  -17.10   20.10
   7   1   0   16.90   16.60
   7   1   0  -33.50   23.90
  -7  -1   0    9.10   14.60
  -7  -1   0   49.70   27.10
  -7  -1   0    1.70   15.10
   8   1   0   23.00   13.80
   8   1   0   23.70   22.70
   8   1   0  -24.90   17.10
   8   1   0    0.90   24.50
  -8  -1   0   22.50   16.00
  -8  -1   0   36.00   28.70
  -8  -1   0   36.00   16.40
   9   1   0  105.59   23.60
   9   1   0  103.69   19.90
   9   1   0  128.19   34.40
   9   1   0   74.09   27.10
  -9  -1   0  142.39   21.90
  -9  -1   0  102.59   21.60
  -9  -1   0   17.00   32.20
  10   1   0  218.98   38.80
  10   1   0  196.48   28.90
  10   1   0  119.69   31.80
  10   1   0  130.59   24.00
 -10  -1   0  134.79   39.80
 -10  -1   0  148.99   26.30
  11   1   0  105.99   25.20
  11   1   0   42.30   30.70
  11   1   0  110.49   30.10
  11   1   0   68.09   19.70
 -11  -1   0   68.69   20.90
 -11  -1   0   77.09   39.30
 -11  -1   0   79.39   19.80
  12   1   0   65.09   36.10
  12   1   0   13.30   18.30
  12   1   0   15.50   20.10
  12   1   0   13.30   28.50
 -12  -1   0   36.30   19.90
 -12  -1   0    5.40   38.50
  13   1   0   75.09   38.00
  13   1   0   86.99   34.20
  13   1   0  142.39   25.10
 -13  -1   0   81.49   25.00
 -13  -1   0  116.19   45.60
  14   1   0  -21.20   30.90
  14   1   0  -50.09   36.30
 -14  -1   0    4.20   45.40
 -14  -1   0   52.89   21.80
  15   1   0   28.00   34.70
  15   1   0   53.09   39.50
 -15  -1   0   -8.10   48.00
  16   1   0  -23.20   35.30
  16   1   0  -21.00   40.90
 -16  -1   0  -83.59   50.49
  17   1   0   33.80   42.60
  17   1   0   51.29   39.20
 -17  -1   0  -73.39   52.89
  18   1   0   91.49   55.29
  18   1   0   26.80   42.80
 -18  -1   0  105.89   70.99
  19   1   0   82.79   57.89
  19   1   0   20.90   46.10
 -19  -1   0   94.39   75.09
 -19   1   1  -45.10   69.79
  19  -1  -1    6.40   48.70
  19  -1  -1  -50.29   55.79
 -18   1   1   21.40   65.09
  18  -1  -1  -64.99   49.50
  18  -1  -1    5.90   39.80
 -17   1   1   95.39   56.29
  17  -1  -1  -15.10   44.80
  17  -1  -1  -27.80   35.20
 -16   1   1   28.50   49.70
  16  -1  -1  -57.39   33.30
  16  -1  -1   17.00   42.10
 -15   1   1  -33.10   43.50
  15  -1  -1   19.20   39.00
  15  -1  -1    4.20   33.90
 -14   1   1   32.00   43.90
 -14   1   1   28.20   22.80
  14  -1  -1   41.00   24.00
  14  -1  -1  -28.20   30.70
  14  -1  -1   26.90   39.80
 -13   1   1   66.09   23.80
 -13   1   1   -6.30   41.80
  13  -1  -1   15.00   22.70
  13  -1  -1   -3.10   35.50
  13  -1  -1  -32.40   28.80
 -12   1   1   38.30   22.00
 -12   1   1  -14.90   18.30
 -12   1   1   47.90   41.30
  12  -1  -1   -4.50   21.40
  12  -1  -1   25.40   33.80
  12  -1  -1   -3.30   27.10
 -11   1   1  -53.39   15.90
 -11   1   1  -13.00   19.00
 -11   1   1   -3.40   33.70
  11  -1  -1   20.90   25.60
  11  -1  -1   -5.60   29.70
  11  -1  -1   -7.90   18.80
 -10   1   1   -8.40   17.20
 -10   1   1   31.40   20.30
 -10   1   1    3.10   31.40
  10  -1  -1   43.70   30.50
  10  -1  -1   54.69   20.00
  10  -1  -1   67.39   27.00
  10  -1  -1   69.39   22.30
  -9   1   1   23.80   22.40
  -9   1   1  -32.70   25.90
  -9   1   1  -19.60   17.50
  -9   1   1  -67.69   14.10
   9  -1  -1   -9.60   26.00
   9  -1  -1   -8.20   18.40
   9  -1  -1  -16.40   16.40
   9  -1  -1  -27.60   21.90
  -8   1   1    6.00   21.10
  -8   1   1   -9.90   14.70
  -8   1   1   47.50   27.10
  -8   1   1  -40.30   13.70
  -8   1   1  -41.20   17.20
   8  -1  -1    5.80   21.70
   8  -1  -1   33.20   18.30
   8  -1  -1   34.30   27.00
   8  -1  -1    6.20   16.30
  -7   1   1  274.27   36.40
  -7   1   1  289.37   41.40
  -7   1   1  264.27   39.00
  -7   1   1  275.07   37.10
  -7   1   1  346.67   46.30
  -7   1   1  360.16   47.30
   7  -1  -1  322.27   46.90
   7  -1  -1  270.67   41.60
   7  -1  -1  359.96   41.50
   7  -1  -1  360.26   38.40
  -6   1   1  147.29   25.50
  -6   1   1  129.59   20.70
  -6   1   1  111.09   23.20
  -6   1   1  132.69   30.70
  -6   1   1  128.99   23.60
   6  -1  -1  155.08   28.10
   6  -1  -1  114.39   24.60
   6  -1  -1   78.69   29.20
   6  -1  -1  125.49   25.90
   6  -1  -1  134.59   21.30
  -5   1   1  260.27   37.80
  -5   1   1  223.48   33.50
  -5   1   1  270.27   33.60
  -5   1   1  280.57   31.40
  -5   1   1  234.38   34.00
   5  -1  -1  279.17   35.90
   5  -1  -1  278.07   37.30
   5  -1  -1  243.48   34.40
   5  -1  -1  325.67   40.40
   5  -1  -1  240.08   31.40
   5  -1  -1  215.98   33.60
  -4   1   1  182.68   25.70
  -4   1   1  191.48   29.40
  -4   1   1  179.68   23.00
  -4   1   1  179.58   25.80
  -4   1   1  150.98   26.30
   4  -1  -1  155.28   23.60
   4  -1  -1  156.88   25.70
   4  -1  -1  154.88   27.10
   4  -1  -1  146.29   30.50
   4  -1  -1  232.58   31.00
   4  -1  -1  194.38   27.00
  -3   1   1  168.18   20.70
  -3   1   1  142.99   22.10
  -3   1   1  110.89   23.60
  -3   1   1  110.69   20.20
  -3   1   1  136.69   24.40
  -3   1   1  197.78   26.00
  -3   1   1  151.18   23.00
   3  -1  -1  150.98   26.40
   3  -1  -1  147.69   20.70
   3  -1  -1  196.18   24.70
   3  -1  -1  143.29   23.10
   3  -1  -1  201.08   26.80
  -2   1   1  116.29   16.10
  -2   1   1  110.49   14.60
  -2   1   1  137.89   18.20
  -2   1   1   53.29   15.30
  -2   1   1   95.79   14.70
  -2   1   1   77.49   17.40
   2  -1  -1   95.39   15.90
   2  -1  -1   96.99   15.30
   2  -1  -1   61.59   17.20
   2  -1  -1  107.59   14.70
   2  -1  -1   72.59   15.40
  -1   1   1  275.37   31.40
  -1   1   1  280.77   31.00
  -1   1   1  298.97   31.40
  -1   1   1  283.67   31.10
  -1   1   1  327.07   31.10
   1  -1  -1  301.77   31.00
   1  -1  -1  276.27   31.60
   1  -1  -1  328.77   31.40
   1  -1  -1  245.98   31.00
   1  -1  -1  258.87   31.20
   0   1   1   79.09   10.80
   0   1   1  100.09   10.10
   0   1   1  110.59   11.90
   0  -1  -1   76.09   10.00
   0  -1  -1   82.79   11.30
   1   1   1  230.68   25.90
   1   1   1  261.67   26.90
   1   1   1  216.88   26.00
   1   1   1  296.37   26.50
  -1  -1  -1  244.48   26.50
  -1  -1  -1  273.97   26.40
  -1  -1  -1  167.78   25.90
  -1  -1  -1  215.48   25.90
   2   1   1   71.29   15.90
   2   1   1   96.49   14.10
   2   1   1   89.59   16.60
   2   1   1   62.19   12.30
  -2  -1  -1  108.49   14.60
  -2  -1  -1  116.79   19.20
  -2  -1  -1   66.29   12.70
  -2  -1  -1   82.99   16.50
   3   1   1  127.69   22.70
   3   1   1  174.38   25.40
   3   1   1  147.79   19.30
   3   1   1  162.08   21.70
   3   1   1  165.68   25.70
  -3  -1  -1  111.79   19.40
  -3  -1  -1  142.49   25.50
  -3  -1  -1  166.28   22.70
  -3  -1  -1  168.58   21.30
  -3  -1  -1  149.79   26.10
  -3  -1  -1  146.89   25.20
   4   1   1  194.48   24.50
   4   1   1  192.68   28.40
   4   1   1  165.18   21.00
   4   1   1  195.18   28.70
   4   1   1  176.08   29.50
  -4  -1  -1  134.49   28.50
  -4  -1  -1  181.48   24.10
  -4  -1  -1  114.49   28.40
  -4  -1  -1  136.29   21.70
  -4  -1  -1  213.58   32.80
  -4  -1  -1  192.48   26.60
   5   1   1  250.57   31.70
   5   1   1  210.78   27.30
   5   1   1  249.48   35.30
   5   1   1  260.47   36.70
   5   1   1  196.58   28.50
  -5  -1  -1  270.17   32.70
  -5  -1  -1  329.77   41.10
  -5  -1  -1  286.57   32.20
  -5  -1  -1  228.78   35.40
  -5  -1  -1  250.27   35.50
   6   1   1  172.28   32.00
   6   1   1  107.19   23.10
   6   1   1  150.98   29.70
   6   1   1  131.99   18.10
   6   1   1  139.29   28.10
  -6  -1  -1  167.18   33.80
  -6  -1  -1  150.68   22.80
  -6  -1  -1   53.69   25.10
  -6  -1  -1  149.49   29.20
   7   1   1  354.06   46.30
   7   1   1  264.87   42.20
   7   1   1  319.47   39.90
   7   1   1  289.37   35.10
  -7  -1  -1  280.77   47.80
  -7  -1  -1  360.66   39.60
   8   1   1   64.09   18.00
   8   1   1  -17.70   21.20
   8   1   1   16.60   11.80
   8   1   1   19.00   25.30
  -8  -1  -1   55.69   18.40
  -8  -1  -1   24.20   28.90
   9   1   1   54.49   28.10
   9   1   1  -31.50   17.20
   9   1   1   -3.00   21.50
   9   1   1   14.90   12.20
  -9  -1  -1   25.80   31.00
  -9  -1  -1   29.70   18.90
  10   1   1   92.39   23.50
  10   1   1  111.79   32.80
  10   1   1   77.09   28.40
  10   1   1   87.89   18.00
 -10  -1  -1   93.99   36.30
 -10  -1  -1   94.89   22.90
  11   1   1  -16.50   24.20
  11   1   1   18.50   14.60
  11   1   1   28.50   20.00
  11   1   1   37.20   31.10
 -11  -1  -1  -13.20   34.30
 -11  -1  -1   26.70   20.00
  12   1   1  -14.50   31.30
  12   1   1   -1.50   15.80
  12   1   1    0.40   26.60
 -12  -1  -1   20.60   20.30
 -12  -1  -1   22.00   39.70
  13   1   1  -12.80   36.00
  13   1   1   -1.30   29.30
  13   1   1   29.20   17.20
 -13  -1  -1   55.69   22.60
 -13  -1  -1   25.50   44.10
  14   1   1  -18.10   34.60
  14   1   1   39.80   32.40
 -14  -1  -1   61.09   48.80
 -14  -1  -1   40.30   23.30
  15   1   1   49.70   39.30
  15   1   1   24.10   32.70
 -15  -1  -1  -48.90   47.00
  16   1   1  -38.40   39.40
  16   1   1    3.20   34.10
 -16  -1  -1   28.50   52.69
  17   1   1  -61.29   41.80
  17   1   1  -23.60   36.50
 -17  -1  -1   36.50   60.89
  18   1   1   33.80   41.50
  18   1   1  -57.69   43.60
 -18  -1  -1  -48.60   59.39
  19   1   1   23.70   59.79
  19   1   1  -56.19   43.20
 -19  -1  -1   33.00   77.09
 -19   1   2   51.49   69.49
  19  -1  -2  -61.79   63.59
  19  -1  -2   17.20   50.59
 -18   1   2  -20.30   60.39
  18  -1  -2  -41.40   39.60
  18  -1  -2  -23.20   52.49
 -17   1   2   45.10   54.29
  17  -1  -2   50.29   46.70
  17  -1  -2  -41.60   37.00
 -16   1   2   42.30   48.70
  16  -1  -2  -13.30   35.80
  16  -1  -2   46.20   44.20
 -15   1   2   21.80   43.70
  15  -1  -2   99.39   39.10
  15  -1  -2   52.59   42.60
 -14   1   2  -26.20   40.60
 -14   1   2   21.10   21.70
  14  -1  -2   36.90   40.50
  14  -1  -2  -58.69   23.30
  14  -1  -2  -15.70   31.80
 -13   1   2   23.30   20.90
 -13   1   2   49.80   42.70
  13  -1  -2  -10.10   31.40
  13  -1  -2  -46.20   22.00
  13  -1  -2   45.10   38.10
 -12   1   2    1.90   21.30
 -12   1   2    3.80   36.90
 -12   1   2  -38.90   19.00
  12  -1  -2   -2.20   23.20
  12  -1  -2   56.69   30.60
  12  -1  -2  -19.00   31.60
 -11   1   2  -30.20   18.50
 -11   1   2  -59.89   18.40
 -11   1   2  -36.50   32.30
  11  -1  -2  -14.30   21.10
  11  -1  -2    6.50   30.30
  11  -1  -2   15.00   27.20
 -10   1   2   23.10   30.70
 -10   1   2  -44.60   18.10
 -10   1   2   33.20   19.80
  10  -1  -2   48.50   21.20
  10  -1  -2   49.40   26.60
  10  -1  -2    9.50   30.90
  -9   1   2   53.29   19.40
  -9   1   2   22.60   19.00
  -9   1   2   47.50   28.60
  -9   1   2   78.49   23.90
  -9   1   2    7.80   18.60
   9  -1  -2   23.20   29.40
   9  -1  -2   74.49   25.50
   9  -1  -2   69.69   20.70
  -8   1   2  263.67   39.60
  -8   1   2  292.77   40.90
  -8   1   2  360.66   40.80
  -8   1   2  396.06   50.09
  -8   1   2  314.27   42.90
   8  -1  -2  386.36   50.49
   8  -1  -2  328.27   41.10
   8  -1  -2  297.57   44.60
  -7   1   2  283.17   34.70
  -7   1   2  252.67   36.90
  -7   1   2  250.07   35.60
  -7   1   2  255.37   40.40
   7  -1  -2  318.17   43.50
   7  -1  -2  240.08   34.30
   7  -1  -2  233.18   38.60
  -6   1   2  358.86   44.30
  -6   1   2  348.37   46.70
  -6   1   2  362.46   44.40
  -6   1   2  357.36   41.80
  -6   1   2  398.36   46.00
   6  -1  -2  307.37   42.70
   6  -1  -2  338.97   46.20
   6  -1  -2  396.56   49.70
  -5   1   2   30.40   20.50
  -5   1   2    3.20   15.70
  -5   1   2   18.50   16.50
  -5   1   2   37.30   17.90
  -5   1   2   45.90   15.20
  -5   1   2   27.40   13.00
  -5   1   2   -1.70    7.40
   5  -1  -2   33.70   15.90
   5  -1  -2   36.60   24.30
   5  -1  -2   40.60   19.40
   5  -1  -2   50.39   20.70
  -4   1   2  306.57   36.30
  -4   1   2  293.27   35.40
  -4   1   2  191.48   35.00
  -4   1   2  256.97   33.10
  -4   1   2  327.97   38.40
  -4   1   2  291.87   35.40
  -4   1   2  268.07   35.50
   4  -1  -2  314.07   39.20
   4  -1  -2  242.08   35.90
   4  -1  -2  271.47   34.40
   4  -1  -2  341.17   39.10
   4  -1  -2  287.37   35.90
  -3   1   2 1379.16  133.39
  -3   1   2 1320.97  133.59
  -3   1   2 1086.29  133.39
  -3   1   2 1293.57  133.59
  -3   1   2 1301.27  133.59
  -3   1   2 1334.07  132.89
   3  -1  -2 1323.57  134.19
   3  -1  -2 1389.36  133.29
   3  -1  -2 1259.17  134.09
   3  -1  -2 1223.28  134.49
   3  -1  -2 1247.98  133.49
  -2   1   2  522.75   57.49
  -2   1   2  463.35   57.59
  -2   1   2  599.94   57.49
  -2   1   2  525.15   57.79
  -2   1   2  536.25   57.19
   2  -1  -2  543.15   57.59
   2  -1  -2  549.95   58.19
   2  -1  -2  522.75   57.79
   2  -1  -2  578.94   57.39
   2  -1  -2  471.75   58.19
  -1   1   2 1151.98  107.89
  -1   1   2  992.70  107.09
   1  -1  -2  981.00  107.69
   1  -1  -2 1047.00  108.09
   1  -1  -2 1030.30  107.29
   1  -1  -2 1103.49  107.79
   0   1   2   97.19   10.70
   0   1   2   99.29   13.70
   0   1   2   92.69   13.90
   0   1   2   96.89   14.10
   0  -1  -2   75.99   14.20
   0  -1  -2   69.99   13.50
   0  -1  -2   96.69   13.60
   1   1   2  972.30  100.49
   1   1   2 1072.39  101.49
   1   1   2  945.51  101.39
   1   1   2  999.90  101.49
  -1  -1  -2 1094.79  101.89
  -1  -1  -2  915.21  101.39
  -1  -1  -2  935.71  101.49
  -1  -1  -2  945.11  100.49
   2   1   2  570.64   58.59
   2   1   2  470.45   58.09
   2   1   2  524.25   56.29
   2   1   2  583.04   57.79
   2   1   2  501.05   55.29
  -2  -1  -2  605.24   58.39
  -2  -1  -2  474.55   58.59
  -2  -1  -2  532.35   56.09
  -2  -1  -2  556.24   59.19
   3   1   2 1227.38  131.79
   3   1   2 1301.77  132.29
   3   1   2 1237.08  130.89
   3   1   2 1191.38  129.49
  -3  -1  -2 1329.67  132.49
  -3  -1  -2 1310.17  130.49
  -3  -1  -2 1369.66  133.19
  -3  -1  -2 1217.38  131.19
   4   1   2  293.97   35.90
   4   1   2  279.27   37.60
   4   1   2  250.27   32.50
   4   1   2  339.77   39.80
  -4  -1  -2  288.37   36.00
  -4  -1  -2  319.57   42.60
  -4  -1  -2  304.57   36.60
  -4  -1  -2  255.17   38.80
   5   1   2   -2.50    6.70
   5   1   2   29.60   19.70
   5   1   2   13.60    7.00
   5   1   2   31.10   21.90
   5   1   2   32.90   16.60
  -5  -1  -2   76.09   18.10
  -5  -1  -2   32.50   21.00
  -5  -1  -2   42.00   17.00
  -5  -1  -2   43.50   26.40
   6   1   2  355.16   44.80
   6   1   2  330.57   40.80
   6   1   2  293.47   34.30
   6   1   2  359.46   43.50
  -6  -1  -2  303.37   47.20
  -6  -1  -2  339.57   41.40
  -6  -1  -2  348.27   44.40
   7   1   2  222.68   28.60
   7   1   2  328.27   40.10
   7   1   2  287.47   35.20
   7   1   2  302.67   42.60
  -7  -1  -2  266.27   36.00
  -7  -1  -2  238.88   42.80
   8   1   2  379.36   42.80
   8   1   2  307.27   36.40
   8   1   2  368.06   50.09
   8   1   2  360.36   47.50
  -8  -1  -2  279.37   52.09
  -8  -1  -2  344.87   43.50
   9   1   2   66.09   26.00
   9   1   2   65.49   12.70
   9   1   2   88.59   30.00
   9   1   2   13.30   18.60
  -9  -1  -2   54.39   33.20
  -9  -1  -2   69.79   22.10
  10   1   2   22.30   20.20
  10   1   2   51.09   25.50
  10   1   2   81.99   31.40
  10   1   2   53.19   12.90
 -10  -1  -2   43.50   32.70
 -10  -1  -2   35.90   21.50
  11   1   2   26.10   25.30
  11   1   2   25.00   12.40
  11   1   2    4.70   29.30
 -11  -1  -2   13.70   21.10
 -11  -1  -2   -4.40   36.60
  12   1   2    5.80   27.30
  12   1   2  -33.30   31.00
  12   1   2    9.00   11.80
 -12  -1  -2  -53.29   37.70
 -12  -1  -2   28.10   22.80
  13   1   2  -15.60   33.80
  13   1   2   21.70   29.30
 -13  -1  -2    9.30   23.00
 -13  -1  -2   13.90   39.60
  14   1   2  -15.10   29.40
  14   1   2   -3.40   36.40
 -14  -1  -2   52.69   47.30
 -14  -1  -2    4.60   24.20
  15   1   2   73.39   34.20
  15   1   2   62.69   39.40
 -15  -1  -2  -57.69   47.90
  16   1   2  -30.20   39.40
  16   1   2   12.80   33.50
 -16  -1  -2  -36.00   53.09
  17   1   2   -9.20   44.50
  17   1   2  -15.50   35.00
 -17  -1  -2   23.00   60.79
  18   1   2   -4.10   41.40
  18   1   2    1.60   50.99
 -18  -1  -2   78.99   67.09
  19   1   2   76.89   48.30
  19   1   2  -89.99   53.49
 -19  -1  -2  -54.69   76.29
 -19   1   3    2.00   67.49
  19  -1  -3   60.49   67.69
  19  -1  -3 -117.09   47.70
 -18   1   3  -23.10   57.69
  18  -1  -3  -51.09   51.89
  18  -1  -3   47.80   45.90
 -17   1   3   75.49   56.99
  17  -1  -3   49.30   42.10
  17  -1  -3   -4.10   46.40
 -16   1   3  -31.60   41.10
  16  -1  -3  112.09   42.00
  16  -1  -3  -17.50   41.60
 -15   1   3   88.19   46.10
  15  -1  -3    5.40   41.60
  15  -1  -3   -7.70   29.00
  15  -1  -3   39.90   36.20
 -14   1   3   26.00   41.10
 -14   1   3   23.70   24.90
  14  -1  -3   52.89   41.50
  14  -1  -3   59.59   29.80
  14  -1  -3   12.80   35.60
 -13   1   3  -25.20   19.20
 -13   1   3   32.10   39.30
  13  -1  -3  -20.10   30.80
  13  -1  -3   37.30   39.70
  13  -1  -3   12.50   25.90
 -12   1   3  -40.70   22.30
 -12   1   3    4.70   34.80
 -12   1   3  -15.00   19.00
  12  -1  -3   50.69   35.70
  12  -1  -3   24.80   30.80
  12  -1  -3   79.19   27.10
 -11   1   3   42.20   33.20
 -11   1   3  -11.30   19.20
 -11   1   3  -69.39   19.60
  11  -1  -3  -53.39   29.50
  11  -1  -3  -18.60   26.90
  11  -1  -3   21.30   23.00
 -10   1   3   67.89   30.50
 -10   1   3  -16.60   20.40
 -10   1   3   64.59   21.00
  10  -1  -3   93.69   30.00
  10  -1  -3   76.89   23.40
  10  -1  -3  107.19   33.60
  -9   1   3   24.00   18.90
  -9   1   3   11.70   24.90
  -9   1   3   11.10   21.40
   9  -1  -3   11.50   24.30
   9  -1  -3    0.30   18.40
   9  -1  -3  -46.40   27.60
  -8   1   3   29.70   23.70
  -8   1   3   29.00   19.10
  -8   1   3  -10.90   16.30
  -8   1   3    8.20   19.20
   8  -1  -3   28.40   27.60
   8  -1  -3   -4.00   18.30
   8  -1  -3   -0.20   22.90
  -7   1   3   27.70   24.00
  -7   1   3   67.99   20.40
  -7   1   3   24.50   17.20
  -7   1   3   38.50   19.20
   7  -1  -3   45.20   19.70
   7  -1  -3   51.69   23.90
   7  -1  -3   25.60   27.10
  -6   1   3   18.90   23.30
  -6   1   3   44.30   18.20
  -6   1   3   30.40   20.00
  -6   1   3    9.90   15.30
   6  -1  -3   26.90   20.40
   6  -1  -3   12.80   24.90
   6  -1  -3   58.19   19.00
   6  -1  -3   16.10   20.60
  -5   1   3  335.67   44.20
  -5   1   3  344.27   44.10
  -5   1   3  363.76   42.70
  -5   1   3  364.06   46.40
  -5   1   3  361.76   45.20
  -5   1   3  361.76   44.40
   5  -1  -3  376.96   45.30
   5  -1  -3  355.46   44.30
   5  -1  -3  406.56   49.30
   5  -1  -3  350.86   46.50
   5  -1  -3  374.56   44.70
  -4   1   3  540.05   56.89
  -4   1   3  433.16   55.99
  -4   1   3  518.55   56.69
  -4   1   3  496.75   55.29
  -4   1   3  524.35   56.19
  -4   1   3  440.16   56.19
   4  -1  -3  521.05   58.99
   4  -1  -3  464.35   59.29
   4  -1  -3  498.35   56.99
   4  -1  -3  531.15   57.29
  -3   1   3 1255.57  137.79
  -3   1   3 1348.86  138.79
  -3   1   3 1374.96  138.49
  -3   1   3 1372.96  137.79
  -3   1   3 1338.37  137.89
  -3   1   3 1355.06  137.59
   3  -1  -3 1319.87  138.79
   3  -1  -3 1277.77  139.19
   3  -1  -3 1312.47  138.19
   3  -1  -3 1357.66  138.29
  -2   1   3 1076.59  122.89
  -2   1   3 1298.47  122.79
  -2   1   3 1224.58  122.69
  -2   1   3 1150.88  122.49
   2  -1  -3 1148.19  123.69
   2  -1  -3 1218.68  122.99
   2  -1  -3 1167.98  123.09
  -1   1   3  318.67   36.10
  -1   1   3  263.47   36.10
   1  -1  -3  312.97   35.70
   1  -1  -3  303.97   36.10
   1  -1  -3  302.37   37.20
   0   1   3 1456.55  149.99
   0   1   3 1406.66  150.78
   0   1   3 1660.33  150.58
   0   1   3 1495.65  150.88
   0  -1  -3 1409.86  150.18
   0  -1  -3 1456.75  150.88
   0  -1  -3 1291.37  150.68
   0  -1  -3 1580.94  150.68
   1   1   3  315.07   35.10
   1   1   3  274.87   35.50
   1   1   3  292.27   33.30
   1   1   3  247.28   33.60
  -1  -1  -3  313.37   37.10
  -1  -1  -3  280.77   36.00
  -1  -1  -3  319.77   36.30
  -1  -1  -3  323.67   34.00
   2   1   3 1199.48  118.29
   2   1   3 1270.37  120.59
   2   1   3 1277.57  120.79
   2   1   3 1085.79  120.49
   2   1   3 1120.99  117.99
  -2  -1  -3 1114.39  120.79
  -2  -1  -3 1118.59  120.69
  -2  -1  -3 1073.49  118.19
  -2  -1  -3 1112.29  118.59
  -2  -1  -3 1233.78  121.59
   3   1   3 1289.17  132.39
   3   1   3 1321.97  133.29
   3   1   3 1313.67  130.69
   3   1   3 1281.17  129.59
   3   1   3 1227.18  132.89
  -3  -1  -3 1232.98  130.89
  -3  -1  -3 1297.37  134.19
  -3  -1  -3 1225.18  133.09
  -3  -1  -3 1256.07  133.29
   4   1   3  462.15   55.89
   4   1   3  470.25   50.29
   4   1   3  446.26   53.49
   4   1   3  453.05   52.59
   4   1   3  472.15   54.69
  -4  -1  -3  551.54   55.29
  -4  -1  -3  423.66   55.89
  -4  -1  -3  467.65   52.49
  -4  -1  -3  438.96   57.49
   5   1   3  346.37   42.20
   5   1   3  306.57   41.00
   5   1   3  383.76   45.70
   5   1   3  340.47   46.90
   5   1   3  314.67   43.10
  -5  -1  -3  365.26   45.30
  -5  -1  -3  312.67   42.70
  -5  -1  -3  345.47   47.70
  -5  -1  -3  325.07   41.10
   6   1   3   -1.80   19.80
   6   1   3   11.30   22.90
   6   1   3   27.60   17.20
  -6  -1  -3   32.70   19.90
  -6  -1  -3   17.90   24.20
  -6  -1  -3   18.30   28.40
  -6  -1  -3   49.80   18.80
   7   1   3   12.00   21.00
   7   1   3   51.39   19.90
   7   1   3   43.90   26.80
  -7  -1  -3   26.60   21.70
  -7  -1  -3   15.90   29.90
   8   1   3    0.40   21.90
   8   1   3  -53.59   21.80
   8   1   3    0.30   16.20
  -8  -1  -3   -2.40   30.40
  -8  -1  -3   34.60   20.90
   9   1   3   57.39   29.00
   9   1   3  -19.40   24.40
  -9  -1  -3   12.80   20.50
  -9  -1  -3  -15.50   31.40
  10   1   3  122.79   29.60
  10   1   3   77.89   30.50
  10   1   3   60.69   29.90
 -10  -1  -3   73.69   25.00
 -10  -1  -3   42.50   38.80
  11   1   3   11.00   29.50
  11   1   3   45.50   27.20
 -11  -1  -3  -35.20   37.00
 -11  -1  -3   36.90   24.00
  12   1   3   13.30   27.50
  12   1   3   25.40   32.70
 -12  -1  -3   47.40   26.20
 -12  -1  -3   52.19   44.30
  13   1   3    0.50   35.90
  13   1   3   19.50   29.30
 -13  -1  -3   13.00   26.10
 -13  -1  -3   21.30   48.10
  14   1   3   49.99   32.30
  14   1   3   -2.60   35.50
 -14  -1  -3   28.40   27.40
 -14  -1  -3   45.60   49.40
  15   1   3  -12.70   37.10
  15   1   3   29.80   31.50
 -15  -1  -3   53.09   29.10
 -15  -1  -3   25.00   53.49
  16   1   3  -53.99   37.70
  16   1   3   26.20   34.70
 -16  -1  -3  -39.40   53.19
  17   1   3   30.00   36.90
  17   1   3  -22.00   41.30
 -17  -1  -3   55.79   63.59
  18   1   3  -21.30   38.70
  18   1   3    3.70   48.00
 -18  -1  -3   -8.60   67.09
  19   1   3  -15.60   44.60
  19   1   3   61.29   59.39
 -19  -1  -3   30.70   75.29
 -19   1   4   90.29   73.69
  19  -1  -4  -99.19   52.49
  19  -1  -4  128.19   79.09
 -18   1   4   22.10   60.49
  18  -1  -4    1.80   46.90
  18  -1  -4  -44.90   59.69
 -17   1   4   48.70   53.39
  17  -1  -4   64.69   57.49
  17  -1  -4   56.99   44.80
 -16   1   4   19.40   43.70
  16  -1  -4  -21.90   45.20
  16  -1  -4  108.39   45.80
 -15   1   4   -8.30   38.50
  15  -1  -4   25.30   36.80
  15  -1  -4   23.00   41.30
  15  -1  -4   24.60   30.90
 -14   1   4   30.20   39.20
  14  -1  -4  -23.10   41.80
  14  -1  -4    6.50   30.10
  14  -1  -4   61.39   36.40
 -13   1   4  -18.20   19.40
 -13   1   4   41.50   38.90
  13  -1  -4  -38.60   35.60
  13  -1  -4  -20.00   25.90
  13  -1  -4   57.09   36.30
 -12   1   4  -11.70   19.70
 -12   1   4   88.69   35.00
  12  -1  -4   30.50   26.10
  12  -1  -4   -4.30   36.90
  12  -1  -4    8.50   30.90
 -11   1   4  110.49   36.40
 -11   1   4   47.00   21.40
  11  -1  -4   84.99   27.20
  11  -1  -4   80.69   32.20
  11  -1  -4   85.19   38.60
 -10   1   4  -12.20   18.60
 -10   1   4  -16.60   28.60
  10  -1  -4   32.90   33.60
  10  -1  -4   33.90   27.30
  10  -1  -4    7.80   21.80
  -9   1   4   34.70   22.10
  -9   1   4   -0.60   25.50
  -9   1   4   46.10   20.50
  -9   1   4   32.00   22.40
   9  -1  -4   20.20   21.90
   9  -1  -4   98.69   28.40
   9  -1  -4   48.70   31.50
  -8   1   4   42.30   26.90
  -8   1   4   61.49   21.90
  -8   1   4   70.79   22.00
   8  -1  -4   69.59   23.10
   8  -1  -4   35.50   24.60
   8  -1  -4   52.09   29.20
  -7   1   4   56.29   21.60
  -7   1   4   30.00   24.40
  -7   1   4   24.80   19.50
   7  -1  -4   46.30   28.90
   7  -1  -4   19.50   19.60
   7  -1  -4   54.29   24.10
   7  -1  -4   51.09   24.10
  -6   1   4 1006.60  112.19
  -6   1   4 1035.00  112.69
  -6   1   4 1076.99  112.99
  -6   1   4 1076.49  113.79
   6  -1  -4 1177.98  113.79
   6  -1  -4  953.10  112.89
   6  -1  -4 1164.38  116.49
   6  -1  -4 1040.90  115.09
  -5   1   4  478.05   62.19
  -5   1   4  493.75   62.09
  -5   1   4  559.34   61.19
  -5   1   4  509.95   66.39
  -5   1   4  592.54   61.09
  -5   1   4  558.34   61.49
   5  -1  -4  504.75   63.39
   5  -1  -4  598.34   62.69
   5  -1  -4  543.95   65.99
   5  -1  -4  520.45   61.99
  -4   1   4  310.27   34.10
  -4   1   4  235.58   33.20
  -4   1   4  205.38   32.50
  -4   1   4  246.98   32.10
  -4   1   4  267.87   35.00
  -4   1   4  257.27   34.20
   4  -1  -4  243.48   37.40
   4  -1  -4  235.98   33.10
   4  -1  -4  211.88   34.70
   4  -1  -4  231.98   34.00
  -3   1   4  654.33   68.59
  -3   1   4  646.64   69.99
  -3   1   4  611.24   69.69
  -3   1   4  644.94   69.39
  -3   1   4  639.24   69.79
   3  -1  -4  619.64   70.49
   3  -1  -4  655.63   69.99
   3  -1  -4  620.84   71.19
  -2   1   4 1635.34  165.98
  -2   1   4 1694.03  166.18
   2  -1  -4 1585.34  166.88
   2  -1  -4 1602.64  167.08
   2  -1  -4 1537.35  166.38
  -1   1   4 1462.05  144.59
  -1   1   4 1493.25  144.69
  -1   1   4 1479.55  144.09
  -1   1   4 1277.27  144.49
   1  -1  -4 1382.86  144.89
   1  -1  -4 1384.16  145.19
   1  -1  -4 1291.37  144.79
   0   1   4 1972.80  206.88
   0   1   4 2092.49  207.08
   0   1   4 2087.59  206.38
   0   1   4 1943.61  205.48
   0  -1  -4 2070.19  206.68
   0  -1  -4 2030.40  206.98
   0  -1  -4 1948.61  205.98
   1   1   4 1353.26  134.29
   1   1   4 1358.76  133.69
   1   1   4 1291.37  135.39
  -1  -1  -4 1272.07  135.79
  -1  -1  -4 1275.57  134.59
  -1  -1  -4 1177.48  135.79
  -1  -1  -4 1331.57  134.19
   2   1   4 1503.05  156.08
   2   1   4 1559.94  158.48
   2   1   4 1693.03  159.38
   2   1   4 1720.93  156.98
   2   1   4 1505.05  158.88
  -2  -1  -4 1493.15  157.08
  -2  -1  -4 1558.94  159.28
  -2  -1  -4 1585.84  156.38
  -2  -1  -4 1428.96  158.98
  -2  -1  -4 1255.37  158.98
   3   1   4  682.13   66.59
   3   1   4  613.64   63.39
   3   1   4  602.04   62.59
   3   1   4  551.34   66.99
   3   1   4  633.74   67.39
  -3  -1  -4  558.34   63.09
  -3  -1  -4  593.14   67.69
  -3  -1  -4  600.64   67.69
  -3  -1  -4  597.44   68.99
  -3  -1  -4  581.54   64.19
   4   1   4  230.78   26.40
   4   1   4  242.08   36.60
   4   1   4  276.47   34.20
   4   1   4  235.48   29.80
   4   1   4  214.18   33.40
  -4  -1  -4  283.77   35.90
  -4  -1  -4  231.28   31.00
  -4  -1  -4  268.97   40.50
  -4  -1  -4  204.68   34.40
   5   1   4  528.05   61.29
   5   1   4  542.35   54.99
   5   1   4  485.75   59.59
   5   1   4  509.95   58.79
   5   1   4  530.25   57.39
  -5  -1  -4  431.56   60.19
  -5  -1  -4  432.16   60.89
  -5  -1  -4  523.25   61.49
  -5  -1  -4  538.15   57.49
   6   1   4 1010.70  109.09
   6   1   4 1035.00  110.29
   6   1   4  991.10  107.39
  -6  -1  -4 1037.60  110.49
  -6  -1  -4  984.00  112.29
  -6  -1  -4  935.91  109.19
  -6  -1  -4 1090.19  107.79
   7   1   4   37.40   18.20
   7   1   4   -3.00   23.40
   7   1   4   26.40   21.50
  -7  -1  -4   25.50   22.20
  -7  -1  -4   26.10   31.30
  -7  -1  -4    3.90   20.20
   8   1   4   53.79   24.00
   8   1   4   57.19   26.80
  -8  -1  -4   48.00   24.10
  -8  -1  -4   35.20   31.10
   9   1   4   67.59   27.60
   9   1   4   46.10   24.70
  -9  -1  -4   58.39   36.10
  -9  -1  -4   64.49   25.70
  10   1   4  -53.29   25.70
  10   1   4   18.30   28.80
 -10  -1  -4  -33.10   35.20
 -10  -1  -4   37.30   25.20
  11   1   4    2.30   30.80
  11   1   4   64.29   31.20
 -11  -1  -4   61.39   28.40
 -11  -1  -4  122.69   46.10
  12   1   4    8.30   32.80
  12   1   4  -20.10   27.30
 -12  -1  -4   30.70   43.50
 -12  -1  -4    4.50   28.20
  13   1   4   58.29   30.20
  13   1   4   33.70   38.00
 -13  -1  -4   33.60   28.40
 -13  -1  -4   10.20   46.30
  14   1   4   52.29   32.20
  14   1   4   20.50   38.30
 -14  -1  -4  -24.40   49.90
 -14  -1  -4   41.00   29.90
  15   1   4   -5.00   32.20
  15   1   4   22.10   39.30
 -15  -1  -4   17.80   30.00
 -15  -1  -4  -48.40   51.09
  16   1   4  -35.80   30.10
  16   1   4  -73.39   39.10
 -16  -1  -4   30.40   58.59
  17   1   4   14.80   36.40
  17   1   4    1.50   45.70
 -17  -1  -4   58.99   64.69
  18   1   4   13.20   52.39
  18   1   4   40.40   40.20
 -18  -1  -4  -43.90   68.09
  19   1   4  -31.30   44.80
  19   1   4  -27.80   61.79
 -19  -1  -4   -5.90   83.79
 -19   1   5   69.29   68.39
  19  -1  -5 -101.29   56.69
  19  -1  -5  -91.49   69.99
 -18   1   5  -78.59   52.69
  18  -1  -5  -24.10   48.40
  18  -1  -5  -55.89   60.89
 -17   1   5  110.19   52.19
  17  -1  -5 -120.09   50.79
  17  -1  -5   -7.00   44.90
 -16   1   5  -26.20   39.50
  16  -1  -5   10.30   42.50
  16  -1  -5  -62.89   43.90
 -15   1   5   44.00   41.50
  15  -1  -5   11.70   33.80
  15  -1  -5  -16.10   37.00
  15  -1  -5  -20.20   46.60
 -14   1   5   91.99   41.90
  14  -1  -5   49.70   32.50
  14  -1  -5   44.60   39.10
  14  -1  -5   59.89   45.30
 -13   1   5   46.70   37.10
 -13   1   5    1.20   20.10
  13  -1  -5   62.99   45.00
  13  -1  -5   72.09   36.40
  13  -1  -5   40.30   29.80
 -12   1   5   11.10   19.50
 -12   1   5   46.00   36.30
  12  -1  -5   39.10   41.50
  12  -1  -5   48.20   29.00
  12  -1  -5   39.30   34.30
 -11   1   5  -26.20   31.50
 -11   1   5    9.30   20.00
  11  -1  -5   49.60   38.60
  11  -1  -5   26.90   26.60
  11  -1  -5   13.10   30.50
 -10   1   5   26.90   30.70
 -10   1   5   63.49   22.50
  10  -1  -5  110.19   38.30
  10  -1  -5   30.80   30.30
  10  -1  -5  100.59   27.50
  -9   1   5   17.00   20.60
  -9   1   5   -8.10   23.50
   9  -1  -5   25.40   23.50
   9  -1  -5   27.90   30.70
   9  -1  -5  -35.50   24.60
  -8   1   5   40.00   22.20
  -8   1   5   98.39   28.20
  -8   1   5   65.09   21.80
   8  -1  -5  101.09   32.20
   8  -1  -5   46.10   26.70
   8  -1  -5    4.90   22.70
  -7   1   5   25.20   23.80
  -7   1   5   73.79   22.00
  -7   1   5   65.39   20.60
   7  -1  -5   73.39   29.40
   7  -1  -5   39.30   22.20
   7  -1  -5  -15.90   20.80
   7  -1  -5   53.59   26.30
  -6   1   5   90.89   19.70
  -6   1   5   39.60   22.90
   6  -1  -5    8.20   27.00
   6  -1  -5   38.10   20.80
   6  -1  -5   50.39   24.50
   6  -1  -5   30.00   22.50
  -5   1   5  392.26   51.39
  -5   1   5  373.76   49.50
  -5   1   5  390.56   49.99
   5  -1  -5  440.16   51.89
   5  -1  -5  439.86   54.39
   5  -1  -5  525.65   56.79
   5  -1  -5  443.86   51.89
  -4   1   5  206.68   30.10
  -4   1   5  207.08   30.60
  -4   1   5  172.88   28.40
  -4   1   5  215.58   31.80
  -4   1   5  228.78   29.40
   4  -1  -5  189.48   30.50
   4  -1  -5  191.18   32.40
   4  -1  -5  158.08   30.10
  -3   1   5  571.64   67.49
  -3   1   5  679.73   67.19
  -3   1   5  593.24   67.29
   3  -1  -5  608.74   69.49
   3  -1  -5  606.34   68.79
   3  -1  -5  579.24   68.29
  -2   1   5  670.73   72.39
  -2   1   5  701.73   72.99
   2  -1  -5  672.13   73.19
   2  -1  -5  685.33   74.39
   2  -1  -5  606.14   73.59
  -1   1   5  323.97   46.20
  -1   1   5  400.56   51.09
  -1   1   5  453.95   48.30
  -1   1   5  465.75   49.80
  -1   1   5  444.06   50.09
   1  -1  -5  483.35   50.49
   1  -1  -5  490.85   51.89
   0   1   5  185.18   27.00
   0   1   5  140.59   27.80
   0   1   5  195.98   25.20
   0   1   5  160.78   24.20
   0  -1  -5  151.58   28.10
   0  -1  -5  136.19   25.40
   0  -1  -5  110.99   25.30
   1   1   5  409.46   49.30
   1   1   5  455.15   48.30
   1   1   5  429.56   51.39
  -1  -1  -5  494.25   53.69
  -1  -1  -5  383.06   50.19
  -1  -1  -5  414.66   48.70
  -1  -1  -5  460.95   53.89
   2   1   5  570.14   70.99
   2   1   5  657.63   67.89
   2   1   5  720.23   69.39
   2   1   5  678.63   72.49
   2   1   5  666.33   71.29
  -2  -1  -5  619.14   73.59
  -2  -1  -5  607.84   73.09
  -2  -1  -5  666.13   69.89
  -2  -1  -5  657.53   73.29
   3   1   5  507.75   59.89
   3   1   5  508.35   56.09
   3   1   5  543.55   60.79
   3   1   5  485.25   60.09
   3   1   5  564.74   56.29
  -3  -1  -5  511.75   62.19
  -3  -1  -5  537.15   62.19
  -3  -1  -5  474.65   56.79
  -3  -1  -5  562.54   57.29
  -3  -1  -5  572.54   61.49
   4   1   5  160.68   28.00
   4   1   5  222.08   32.60
   4   1   5  169.28   23.30
   4   1   5  171.78   21.00
  -4  -1  -5  140.09   22.30
  -4  -1  -5  134.69   24.90
  -4  -1  -5  185.48   30.10
  -4  -1  -5  174.28   32.40
  -4  -1  -5  191.98   35.50
   5   1   5  426.26   48.50
   5   1   5  313.17   39.90
   5   1   5  433.66   44.90
  -5  -1  -5  410.86   51.49
  -5  -1  -5  429.36   54.49
  -5  -1  -5  443.96   50.49
  -5  -1  -5  403.86   46.20
   6   1   5   68.49   15.00
   6   1   5   56.79   22.50
   6   1   5   77.29   19.20
  -6  -1  -5   50.89   32.50
  -6  -1  -5   38.00   20.30
  -6  -1  -5   72.69   26.80
   7   1   5    1.00   22.10
   7   1   5   52.29   20.00
   7   1   5   22.40   24.90
  -7  -1  -5   19.40   18.70
  -7  -1  -5   31.20   33.30
  -7  -1  -5   36.10   25.00
   8   1   5   17.10   27.20
   8   1   5   29.00   23.30
  -8  -1  -5   94.19   36.20
  -8  -1  -5   25.80   24.90
   9   1   5   40.20   29.60
   9   1   5   31.40   23.70
  -9  -1  -5    6.40   25.60
  -9  -1  -5   49.60   37.70
  10   1   5   88.19   31.40
  10   1   5   35.20   26.20
 -10  -1  -5   42.60   28.20
 -10  -1  -5   90.69   37.70
  11   1   5  -22.80   28.70
  11   1   5   24.40   32.30
 -11  -1  -5   58.09   44.80
 -11  -1  -5   57.79   30.20
  12   1   5  -23.80   29.70
  12   1   5   14.40   35.30
 -12  -1  -5   30.10   45.80
 -12  -1  -5   -1.40   29.10
  13   1   5   38.00   33.40
  13   1   5   43.30   30.50
 -13  -1  -5   49.30   33.80
 -13  -1  -5   57.19   50.19
  14   1   5   33.30   38.00
  14   1   5    3.80   30.50
 -14  -1  -5  -35.80   48.10
 -14  -1  -5   46.00   32.90
  15   1   5  -32.80   39.10
  15   1   5  -28.70   30.20
 -15  -1  -5   40.00   33.60
 -15  -1  -5   34.80   54.59
  16   1   5   -4.30   33.20
  16   1   5  -34.70   41.20
 -16  -1  -5   12.20   58.79
  17   1   5   32.60   35.50
  17   1   5   27.40   44.40
 -17  -1  -5  162.98   70.19
  18   1   5   20.10   51.89
  18   1   5  -45.80   36.40
 -18  -1  -5   -1.90   72.79
  19   1   5   17.00   66.49
  19   1   5  -21.00   42.60
 -19  -1  -5  -88.49   79.89
 -19   1   6   49.10   78.49
  19  -1  -6   -5.60   67.09
  19  -1  -6 -118.29   78.99
 -18   1   6   61.39   59.49
  18  -1  -6   -8.20   57.29
  18  -1  -6    5.40   60.49
 -17   1   6  146.19   55.29
  17  -1  -6  -27.80   43.90
  17  -1  -6   41.10   58.09
 -16   1   6   22.00   45.30
  16  -1  -6  -44.90   36.80
  16  -1  -6   54.49   49.60
  16  -1  -6    6.70   43.50
 -15   1   6   -8.50   40.80
  15  -1  -6  -12.40   40.00
  15  -1  -6  -65.69   32.10
  15  -1  -6  -18.10   46.90
 -14   1   6  -13.30   38.40
  14  -1  -6  -62.19   29.30
  14  -1  -6   -7.20   38.50
  14  -1  -6   31.80   43.10
 -13   1   6  -21.10   23.00
 -13   1   6  -15.70   36.60
  13  -1  -6   -1.60   36.20
  13  -1  -6  -13.30   28.80
  13  -1  -6  -67.39   37.10
 -12   1   6  -46.90   32.80
 -12   1   6   10.80   19.40
  12  -1  -6    2.50   28.70
  12  -1  -6  -15.40   32.20
  12  -1  -6   79.59   41.00
 -11   1   6   30.70   21.00
 -11   1   6  -47.20   31.40
  11  -1  -6   84.69   30.10
  11  -1  -6   64.59   40.40
  11  -1  -6   36.40   33.40
 -10   1   6   82.59   34.70
 -10   1   6  155.88   28.30
  10  -1  -6   94.49   31.40
  10  -1  -6  149.29   41.90
  10  -1  -6  144.29   37.40
  -9   1   6   10.20   26.00
  -9   1   6   -6.20   22.90
   9  -1  -6   30.60   23.70
   9  -1  -6   63.29   34.40
   9  -1  -6   48.90   30.00
  -8   1   6   68.89   23.10
  -8   1   6   63.29   25.60
  -8   1   6   75.39   27.80
   8  -1  -6   48.10   24.40
   8  -1  -6   52.09   27.50
   8  -1  -6   47.10   24.10
   8  -1  -6   99.49   33.00
  -7   1   6  346.87   43.80
  -7   1   6  297.67   40.60
   7  -1  -6  285.87   46.20
   7  -1  -6  332.27   43.20
   7  -1  -6  205.48   41.80
   7  -1  -6  368.46   49.20
  -6   1   6   72.59   22.20
  -6   1   6   52.29   19.70
   6  -1  -6   93.09   27.30
   6  -1  -6   75.79   24.80
   6  -1  -6   74.49   28.80
   6  -1  -6   41.50   22.30
  -5   1   6  296.37   33.20
  -5   1   6  211.08   31.70
   5  -1  -6  198.08   34.30
   5  -1  -6  162.98   33.00
   5  -1  -6  171.58   35.50
  -4   1   6  444.36   48.60
  -4   1   6  396.46   45.80
  -4   1   6  424.06   48.90
   4  -1  -6  455.15   49.90
   4  -1  -6  296.27   47.80
   4  -1  -6  347.07   51.19
  -3   1   6  650.93   67.79
  -3   1   6  625.84   67.09
  -3   1   6  576.34   67.29
   3  -1  -6  601.04   70.19
   3  -1  -6  558.04   67.89
   3  -1  -6  573.74   68.59
  -2   1   6  240.48   31.60
   2  -1  -6  190.38   32.80
   2  -1  -6  199.88   32.00
   2  -1  -6  222.38   33.10
  -1   1   6  359.46   42.90
  -1   1   6  299.77   37.70
  -1   1   6  314.77   38.90
  -1   1   6  356.66   41.80
  -1   1   6  359.56   42.80
   1  -1  -6  348.57   42.80
   1  -1  -6  329.27   42.70
   0   1   6   27.60   14.10
   0   1   6   33.90   18.20
   0   1   6   11.30   14.40
   0   1   6   11.20   18.20
   0  -1  -6   22.90   17.00
   0  -1  -6   21.20   18.00
   0  -1  -6   38.00   21.70
   1   1   6  340.17   43.60
   1   1   6  315.47   42.20
   1   1   6  373.96   41.00
   1   1   6  317.97   39.30
  -1  -1  -6  338.07   42.50
  -1  -1  -6  312.37   45.50
  -1  -1  -6  380.16   44.30
  -1  -1  -6  305.37   41.20
   2   1   6  273.47   34.00
   2   1   6  209.28   27.30
   2   1   6  227.68   29.60
   2   1   6  219.38   32.80
  -2  -1  -6  269.57   35.40
  -2  -1  -6  200.48   30.70
  -2  -1  -6  274.77   38.50
  -2  -1  -6  234.48   34.90
   3   1   6  616.64   60.79
   3   1   6  659.23   65.29
   3   1   6  547.35   64.89
   3   1   6  560.24   59.79
  -3  -1  -6  486.35   66.69
  -3  -1  -6  532.05   61.49
  -3  -1  -6  472.25   65.69
  -3  -1  -6  622.14   65.99
   4   1   6  344.47   50.79
   4   1   6  371.86   47.90
   4   1   6  389.86   42.90
   4   1   6  381.56   48.20
   4   1   6  350.66   41.70
  -4  -1  -6  416.96   48.80
  -4  -1  -6  358.56   51.39
  -4  -1  -6  356.16   43.00
  -4  -1  -6  424.46   45.00
  -4  -1  -6  358.86   50.89
   5   1   6  150.98   24.30
   5   1   6  158.88   21.00
   5   1   6  199.38   31.20
  -5  -1  -6  134.99   22.70
  -5  -1  -6  227.28   28.40
  -5  -1  -6  189.78   38.00
  -5  -1  -6  154.88   34.30
   6   1   6   61.69   19.00
   6   1   6   81.79   23.90
   6   1   6   71.09   17.50
  -6  -1  -6   82.49   21.40
  -6  -1  -6   41.90   33.40
  -6  -1  -6   74.79   29.20
   7   1   6  229.08   38.10
   7   1   6  229.58   35.30
   7   1   6  280.87   32.80
  -7  -1  -6  231.28   46.90
  -7  -1  -6  332.17   45.20
   8   1   6   18.80   28.30
   8   1   6   54.29   24.00
  -8  -1  -6    9.20   26.40
  -8  -1  -6   62.39   36.90
   9   1   6   35.40   25.20
   9   1   6   37.80   28.60
  -9  -1  -6   75.29   35.30
  -9  -1  -6  -14.90   26.10
  10   1   6  153.68   37.30
  10   1   6   97.79   30.20
 -10  -1  -6   93.09   34.60
 -10  -1  -6  182.38   47.80
  11   1   6   61.99   33.30
  11   1   6   55.39   29.30
 -11  -1  -6  123.59   35.00
 -11  -1  -6   58.09   45.50
  12   1   6    1.70   32.70
  12   1   6   16.00   32.40
 -12  -1  -6   54.59   47.40
 -12  -1  -6   29.10   32.50
  13   1   6   71.19   35.80
  13   1   6   68.19   32.00
  13   1   6  -36.90   33.80
 -13  -1  -6  -11.90   30.80
 -13  -1  -6   13.80   49.40
  14   1   6   38.90   36.30
  14   1   6  -10.60   28.80
 -14  -1  -6   48.30   51.29
 -14  -1  -6   80.69   37.20
  15   1   6   42.60   41.80
  15   1   6   28.30   32.20
 -15  -1  -6   28.70   35.70
 -15  -1  -6   -4.50   52.39
  16   1   6   -8.30   42.40
  16   1   6  -57.29   31.60
 -16  -1  -6 -146.09   50.89
 -16  -1  -6   27.30   52.49
  17   1   6  -35.80   46.40
  17   1   6  -38.40   33.30
 -17  -1  -6   54.39   68.39
  18   1   6  -34.50   49.30
  18   1   6  -13.20   35.90
 -18  -1  -6   69.39   80.79
  19   1   6   35.20   45.60
 -19  -1  -6  -22.20  114.49
 -18   1   7  105.99   62.49
  18  -1  -7   25.30   57.19
  18  -1  -7  107.89   67.39
 -17   1   7   94.09   53.89
  17  -1  -7   73.89   61.39
  17  -1  -7   38.30   49.80
 -16   1   7   51.59   44.30
  16  -1  -7   -5.10   47.00
  16  -1  -7   51.09   46.60
  16  -1  -7   13.50   37.90
 -15   1   7   -6.90   38.00
  15  -1  -7   -8.00   36.00
  15  -1  -7   87.29   45.00
  15  -1  -7   -2.00   47.30
 -14   1   7    6.30   36.30
  14  -1  -7   28.40   47.20
  14  -1  -7   40.70   34.80
  14  -1  -7   38.20   41.60
 -13   1   7  -59.79   31.20
  13  -1  -7  -34.90   43.00
  13  -1  -7  -19.50   30.20
  13  -1  -7  -21.00   35.30
 -12   1   7   16.20   35.60
 -12   1   7   22.70   21.00
  12  -1  -7   18.50   38.50
  12  -1  -7   52.49   29.90
  12  -1  -7  -12.10   32.90
 -11   1   7  191.18   29.30
 -11   1   7    3.30   34.90
  11  -1  -7  118.99   39.40
  11  -1  -7   90.49   32.80
  11  -1  -7  150.88   45.00
 -10   1   7  115.79   30.40
 -10   1   7  136.39   33.90
  10  -1  -7  182.68   44.20
  10  -1  -7   92.59   36.10
  10  -1  -7   92.49   31.90
  -9   1   7  180.18   35.20
  -9   1   7  246.78   34.60
   9  -1  -7  218.98   43.70
   9  -1  -7  112.19   38.00
   9  -1  -7  163.98   35.20
   9  -1  -7  170.98   35.30
  -8   1   7    2.30   22.40
   8  -1  -7  -20.60   26.40
   8  -1  -7  -11.90   22.40
   8  -1  -7    9.90   24.30
   8  -1  -7   14.90   31.10
  -7   1   7   29.20   22.10
   7  -1  -7   29.60   23.30
   7  -1  -7   49.10   28.40
   7  -1  -7   45.50   24.00
  -6   1   7  211.98   32.00
  -6   1   7  216.68   32.70
   6  -1  -7  192.08   37.10
   6  -1  -7  210.38   34.10
   6  -1  -7  193.28   36.30
  -5   1   7   40.00   19.60
  -5   1   7   53.89   19.00
   5  -1  -7   33.10   24.00
   5  -1  -7   62.79   22.70
   5  -1  -7   68.59   26.60
  -4   1   7  577.94   63.89
  -4   1   7  610.54   66.99
   4  -1  -7  571.44   67.89
   4  -1  -7  609.34   69.19
   4  -1  -7  586.44   71.89
  -3   1   7  306.57   37.40
   3  -1  -7  234.58   38.20
   3  -1  -7  252.27   37.50
   3  -1  -7  237.98   39.30
  -2   1   7   93.79   22.40
  -2   1   7   47.50   18.30
  -2   1   7   59.69   20.70
  -2   1   7   22.10   14.10
  -2   1   7   73.19   19.20
   2  -1  -7   86.59   23.00
   2  -1  -7   49.99   20.70
   2  -1  -7   52.49   23.70
  -1   1   7  348.67   45.70
  -1   1   7  458.55   47.30
  -1   1   7  298.77   40.40
   1  -1  -7  437.56   46.90
   1  -1  -7  355.36   46.50
   0   1   7   14.40   13.90
   0   1   7   62.19   20.40
   0   1   7   31.00   20.50
   0   1   7   -3.30   14.40
   0   1   7   37.20   15.50
   0  -1  -7   20.80   22.20
   0  -1  -7   53.79   19.10
   0  -1  -7   74.19   21.20
   1   1   7  391.96   44.60
   1   1   7  402.66   47.10
   1   1   7  327.97   41.50
   1   1   7  316.37   41.50
  -1  -1  -7  351.86   48.30
  -1  -1  -7  353.96   46.50
  -1  -1  -7  309.37   43.30
  -1  -1  -7  338.07   43.40
   2   1   7   89.79   22.30
   2   1   7   80.39   14.40
   2   1   7   72.59   21.60
   2   1   7   79.39   17.50
  -2  -1  -7   91.89   28.90
  -2  -1  -7   91.19   25.70
  -2  -1  -7   67.39   20.20
  -2  -1  -7   88.49   25.60
   3   1   7  251.07   32.30
   3   1   7  280.17   37.50
   3   1   7  264.77   38.20
   3   1   7  264.97   31.20
  -3  -1  -7  268.97   41.80
  -3  -1  -7  266.17   34.30
  -3  -1  -7  231.48   38.30
  -3  -1  -7  247.38   40.30
   4   1   7  568.94   60.49
   4   1   7  635.74   66.59
   4   1   7  545.65   60.59
   4   1   7  467.15   64.99
  -4  -1  -7  524.55   68.59
  -4  -1  -7  518.65   67.99
  -4  -1  -7  541.95   61.99
  -4  -1  -7  671.93   62.89
   5   1   7   58.39   13.30
   5   1   7   37.70   15.50
   5   1   7   10.30   21.10
  -5  -1  -7   48.20   20.00
  -5  -1  -7   73.09   16.70
  -5  -1  -7   17.50   29.10
  -5  -1  -7   57.49   27.90
   6   1   7  180.68   27.10
   6   1   7  186.58   32.30
  -6  -1  -7  201.58   42.70
  -6  -1  -7  112.89   35.90
  -6  -1  -7  216.38   29.90
   7   1   7   34.10   15.80
   7   1   7   -4.40   21.60
   7   1   7   40.10   19.00
  -7  -1  -7   65.69   30.20
  -7  -1  -7   58.39   35.80
  -7  -1  -7   -7.70   17.40
   8   1   7    1.00   26.00
   8   1   7   21.30   23.00
   8   1   7   42.00   19.90
  -8  -1  -7   27.80   29.20
  -8  -1  -7   -0.80   36.00
   9   1   7  119.89   34.30
   9   1   7  139.69   30.60
  -9  -1  -7   65.69   42.50
  -9  -1  -7  143.69   36.30
  10   1   7  133.19   31.50
  10   1   7   97.59   35.40
 -10  -1  -7  115.59   48.40
 -10  -1  -7  100.39   36.70
  11   1   7   98.29   35.80
  11   1   7   79.09   31.20
 -11  -1  -7   92.49   36.10
 -11  -1  -7  110.89   46.50
  12   1   7   28.40   34.20
  12   1   7   55.19   30.70
 -12  -1  -7   21.20   34.20
 -12  -1  -7    4.90   48.70
  13   1   7    8.00   37.10
  13   1   7  -10.60   34.50
 -13  -1  -7  -84.99   47.80
 -13  -1  -7   28.10   36.80
  14   1   7  -10.90   35.70
  14   1   7  -42.40   36.40
  14   1   7   20.80   31.60
 -14  -1  -7   -9.60   35.60
 -14  -1  -7    1.90   49.99
  15   1   7  -25.40   31.40
  15   1   7  -10.90   38.90
 -15  -1  -7   64.49   56.49
 -15  -1  -7  -32.30   35.60
  16   1   7    2.00   33.00
  16   1   7  -85.99   38.70
 -16  -1  -7   34.60   40.20
 -16  -1  -7   54.79   57.09
  17   1   7  104.29   54.09
  17   1   7   -1.70   34.50
 -17  -1  -7  100.49   65.49
  18   1   7  -22.10   52.19
 -18  -1  -7   11.50   77.59
  19   1   7  -13.20   69.39
 -18   1   8   13.10   71.09
  18  -1  -8   13.10   57.89
  18  -1  -8  -35.10   68.39
 -17   1   8   64.19   54.29
  17  -1  -8   92.69   60.89
  17  -1  -8  -20.50   52.79
 -16   1   8  -18.80   44.70
  16  -1  -8   13.60   46.60
  16  -1  -8   17.50   45.90
  16  -1  -8  -16.40   38.90
 -15   1   8   -9.60   40.70
  15  -1  -8   25.40   37.80
  15  -1  -8  -35.60   47.90
  15  -1  -8   -6.70   43.20
 -14   1   8  -59.59   33.30
  14  -1  -8   -5.70   40.40
  14  -1  -8   52.29   44.70
  14  -1  -8    8.80   34.70
 -13   1   8  -56.49   33.70
  13  -1  -8  -67.39   36.30
  13  -1  -8  -38.20   31.80
  13  -1  -8   28.90   41.80
 -12   1   8  -33.20   32.90
 -12   1   8   49.20   24.70
  12  -1  -8   79.39   34.60
  12  -1  -8   99.69   45.00
  12  -1  -8   38.10   40.20
 -11   1   8   37.00   25.50
 -11   1   8   40.70   31.30
  11  -1  -8   56.99   32.40
  11  -1  -8   21.60   37.70
  11  -1  -8   28.60   35.10
 -10   1   8   27.10   26.80
 -10   1   8   83.49   30.20
  10  -1  -8  144.59   41.80
  10  -1  -8   74.69   30.50
  10  -1  -8   16.30   29.10
  10  -1  -8  124.39   38.00
  -9   1   8   86.49   28.60
   9  -1  -8   81.39   30.80
   9  -1  -8  113.39   36.70
   9  -1  -8  103.09   30.10
  -8   1   8   84.79   24.80
   8  -1  -8   74.59   28.40
   8  -1  -8   52.59   27.00
   8  -1  -8   73.79   32.50
  -7   1   8   61.49   20.90
   7  -1  -8  -15.20   22.40
   7  -1  -8   29.80   29.10
   7  -1  -8    6.80   23.70
  -6   1   8   78.79   21.20
   6  -1  -8   75.29   26.60
   6  -1  -8  108.29   31.20
   6  -1  -8   76.99   27.60
  -5   1   8  276.37   36.90
  -5   1   8  295.67   40.50
   5  -1  -8  271.17   42.40
   5  -1  -8  331.57   43.70
   5  -1  -8  362.26   48.10
  -4   1   8   25.40   14.40
  -4   1   8   18.50   19.30
   4  -1  -8    2.00   23.70
   4  -1  -8   12.10   23.30
   4  -1  -8   41.40   22.10
  -3   1   8   40.10   19.60
   3  -1  -8   51.19   22.90
   3  -1  -8    7.10   23.40
   3  -1  -8   24.20   22.40
  -2   1   8   87.59   24.20
  -2   1   8  124.09   26.30
  -2   1   8   84.89   16.10
   2  -1  -8   75.69   25.30
   2  -1  -8   86.19   25.60
  -1   1   8   83.09   25.50
  -1   1   8  122.59   18.80
   1  -1  -8   82.99   26.50
   1  -1  -8   88.29   26.00
   0   1   8  151.18   24.00
   0   1   8  198.38   30.50
   0   1   8  151.08   24.90
   0   1   8  167.28   28.70
   0  -1  -8  168.88   28.60
   0  -1  -8   79.39   25.40
   1   1   8  127.39   25.10
   1   1   8   20.70   15.60
   1   1   8   92.19   20.60
  -1  -1  -8   94.69   23.00
  -1  -1  -8   97.79   23.70
  -1  -1  -8   99.09   30.10
   2   1   8   87.09   13.70
   2   1   8   58.99   22.10
   2   1   8   54.39   21.20
   2   1   8   50.09   17.00
  -2  -1  -8   71.39   27.40
  -2  -1  -8   30.20   19.40
  -2  -1  -8   42.90   23.80
   3   1   8   50.49   21.90
   3   1   8   49.99   12.80
   3   1   8    7.10   13.80
   3   1   8   23.00   20.70
  -3  -1  -8   43.70   26.90
  -3  -1  -8   -5.70   25.00
  -3  -1  -8    3.60   17.70
   4   1   8   33.40   12.60
   4   1   8   11.90   19.90
   4   1   8    4.80   12.70
  -4  -1  -8    6.70   25.10
  -4  -1  -8   35.40   17.70
  -4  -1  -8   47.40   29.80
   5   1   8  292.97   41.40
   5   1   8  290.57   35.00
   5   1   8  259.67   33.70
  -5  -1  -8  258.77   36.30
  -5  -1  -8  256.97   46.00
  -5  -1  -8  275.07   47.60
  -5  -1  -8  364.36   38.80
   6   1   8   66.99   24.80
   6   1   8   76.89   18.50
  -6  -1  -8   82.19   22.10
  -6  -1  -8   43.40   34.60
  -6  -1  -8   72.89   30.70
  -6  -1  -8   49.50   17.10
   7   1   8   25.10   17.10
   7   1   8   31.10   22.90
  -7  -1  -8  -10.50   27.90
  -7  -1  -8  -17.40   18.30
  -7  -1  -8   21.60   34.40
   8   1   8   49.60   25.30
   8   1   8   17.20   20.10
   8   1   8   26.50   16.40
  -8  -1  -8   83.69   33.10
  -8  -1  -8    9.00   36.60
   9   1   8   62.49   27.80
   9   1   8  133.79   35.40
  -9  -1  -8   56.19   34.40
  -9  -1  -8  105.99   43.20
  10   1   8    1.10   25.50
  10   1   8   77.79   34.60
 -10  -1  -8   13.20   33.60
 -10  -1  -8   44.00   43.30
  11   1   8   36.00   28.30
  11   1   8  -37.50   29.00
 -11  -1  -8   -4.10   34.60
 -11  -1  -8   16.80   46.50
  12   1   8   13.40   28.20
  12   1   8  -34.10   33.30
 -12  -1  -8   33.30   48.60
 -12  -1  -8   64.79   38.20
  13   1   8   -9.80   34.50
  13   1   8   37.80   34.70
 -13  -1  -8   21.50   38.10
 -13  -1  -8  -73.29   48.30
  14   1   8   20.10   38.50
  14   1   8  -15.10   36.10
 -14  -1  -8  -20.90   36.60
 -14  -1  -8   22.90   55.39
  15   1   8   38.90   41.70
  15   1   8   16.10   33.20
 -15  -1  -8   73.39   57.99
 -15  -1  -8   -2.10   40.00
  16   1   8   21.70   34.90
  16   1   8   31.50   45.30
 -16  -1  -8  -42.20   55.39
 -16  -1  -8   25.10   43.00
  17   1   8  -14.30   35.70
  17   1   8  -35.90   52.09
 -17  -1  -8   21.90   68.89
  18   1   8   -9.90   55.39
  18   1   8   18.40   40.70
 -18  -1  -8    1.00   79.39
  18  -1  -9  -95.29   60.49
  17  -1  -9   10.70   57.09
 -16   1   9  -28.90   44.10
  16  -1  -9   46.90   50.09
  16  -1  -9  -69.29   36.00
 -15   1   9   12.30   40.80
  15  -1  -9  -20.80   44.60
  15  -1  -9  -17.30   37.00
 -14   1   9  -13.00   36.50
  14  -1  -9   41.50   43.50
  14  -1  -9   15.00   36.30
 -13   1   9  -45.70   32.80
  13  -1  -9  -17.30   39.20
  13  -1  -9   33.10   35.90
 -12   1   9    8.00   31.10
 -12   1   9   11.90   25.70
  12  -1  -9   31.20   40.60
  12  -1  -9   34.60   32.60
 -11   1   9   21.80   29.90
 -11   1   9  107.29   29.50
  11  -1  -9   42.00   34.30
  11  -1  -9   74.89   39.70
 -10   1   9   -5.60   26.70
 -10   1   9   24.20   26.50
  10  -1  -9   59.59   30.10
  10  -1  -9   75.79   36.70
  10  -1  -9   -2.90   28.40
  -9   1   9  -17.90   22.20
   9  -1  -9  -20.80   26.20
   9  -1  -9   -5.10   27.40
   9  -1  -9   38.80   33.60
  -8   1   9   55.19   22.70
   8  -1  -9    5.40   25.80
   8  -1  -9   41.70   28.00
   8  -1  -9    9.10   30.40
  -7   1   9   70.29   21.70
   7  -1  -9   63.49   31.70
   7  -1  -9   76.49   28.90
   7  -1  -9   60.79   27.80
  -6   1   9   77.99   19.10
   6  -1  -9   24.70   25.40
   6  -1  -9   40.20   25.20
   6  -1  -9   19.00   30.30
  -5   1   9   39.50   16.00
   5  -1  -9   52.19   28.60
   5  -1  -9   -1.10   24.70
   5  -1  -9   15.50   23.80
  -4   1   9    1.70   13.40
   4  -1  -9    6.30   20.90
   4  -1  -9   45.40   27.40
   4  -1  -9    6.10   23.10
  -3   1   9  155.28   28.10
  -3   1   9   81.79   16.80
   3  -1  -9   77.59   27.10
   3  -1  -9   96.69   27.40
   3  -1  -9   81.59   28.50
  -2   1   9   81.29   15.40
  -2   1   9   66.49   24.00
   2  -1  -9   71.39   25.80
   2  -1  -9   59.79   24.80
  -1   1   9   17.70   13.60
  -1   1   9   -5.30   19.10
   1  -1  -9   35.10   23.30
   1  -1  -9   13.00   23.10
   0   1   9   59.29   16.40
   0   1   9   21.80   20.80
   0  -1  -9   16.90   19.30
   0  -1  -9    7.10   21.50
   0  -1  -9   38.30   24.70
   1   1   9    2.90   19.90
   1   1   9   23.50   17.90
  -1  -1  -9   26.50   21.40
  -1  -1  -9   15.70   20.20
  -1  -1  -9   15.30   27.30
   2   1   9   76.89   13.80
   2   1   9   55.19   22.40
   2   1   9   16.70   15.80
   2   1   9   77.99   20.70
  -2  -1  -9   45.70   24.80
  -2  -1  -9   52.49   21.40
  -2  -1  -9   58.29   28.30
   3   1   9  106.29   25.60
   3   1   9   81.49   24.70
   3   1   9  128.59   17.10
  -3  -1  -9   81.89   23.10
  -3  -1  -9  117.19   34.20
  -3  -1  -9   50.59   28.00
   4   1   9   19.30   21.60
   4   1   9   16.90   14.40
   4   1   9   -4.00   12.00
  -4  -1  -9    9.50   27.30
  -4  -1  -9   26.30   28.20
  -4  -1  -9   -1.00   18.80
   5   1   9   57.59   15.00
   5   1   9   46.60   14.60
   5   1   9   29.30   21.60
  -5  -1  -9   62.69   33.80
  -5  -1  -9   39.00   27.90
  -5  -1  -9   16.50   18.60
   6   1   9   18.10   23.00
   6   1   9   30.20   16.40
  -6  -1  -9   -7.40   29.60
  -6  -1  -9    4.60   17.10
  -6  -1  -9   35.50   35.00
  -6  -1  -9   42.20   21.00
   7   1   9   42.00   19.30
   7   1   9   91.99   25.90
  -7  -1  -9  121.29   41.40
  -7  -1  -9   71.29   23.10
  -7  -1  -9  116.39   34.50
   8   1   9   32.60   20.10
   8   1   9   40.80   25.30
   8   1   9   41.00   19.40
  -8  -1  -9   64.59   38.90
  -8  -1  -9   75.79   35.90
   9   1   9    7.60   16.20
   9   1   9   36.10   26.50
  -9  -1  -9   15.10   34.00
  -9  -1  -9   42.00   43.30
  10   1   9   31.20   34.30
  10   1   9  -20.50   25.10
 -10  -1  -9   24.50   45.40
 -10  -1  -9  -19.80   35.20
  11   1   9   86.69   38.80
  11   1   9   58.99   30.50
 -11  -1  -9    7.10   47.90
 -11  -1  -9   10.20   35.00
  12   1   9  -40.50   34.10
  12   1   9    5.20   28.40
 -12  -1  -9   67.59   40.30
 -12  -1  -9    0.20   47.60
  13   1   9  -20.40   37.40
  13   1   9   27.90   29.50
 -13  -1  -9   94.09   55.79
 -13  -1  -9   21.80   40.40
  14   1   9   21.80   37.50
  14   1   9   51.49   38.70
 -14  -1  -9   19.30   56.19
 -14  -1  -9   56.79   41.30
  15   1   9   -5.30   39.20
  15   1   9  -60.49   37.10
 -15  -1  -9   90.99   47.00
 -15  -1  -9    9.50   59.19
  16   1   9   -8.90   33.50
  16   1   9   55.89   47.40
 -16  -1  -9  -29.20   58.99
 -16  -1  -9    3.10   42.80
  17   1   9   21.60   53.99
  17   1   9   20.30   35.70
 -17  -1  -9  -44.60   75.99
  18   1   9  -46.80   40.50
  18   1   9  -29.10   66.79
 -18  -1  -9  -98.89   90.09
  18  -1 -10   94.19   96.39
  17  -1 -10  -65.99   44.30
  17  -1 -10   74.99   62.69
  16  -1 -10   -4.50   44.00
  16  -1 -10   76.39   54.39
 -15   1  10  -88.29   34.20
  15  -1 -10   39.70   39.70
  15  -1 -10   59.09   50.09
 -14   1  10  -34.20   33.90
  14  -1 -10   48.10   47.50
  14  -1 -10  -14.00   34.80
 -13   1  10  -32.50   29.50
  13  -1 -10    5.60   40.60
  13  -1 -10  -11.40   36.00
 -12   1  10   -5.60   29.90
  12  -1 -10   -2.80   39.20
  12  -1 -10   35.30   33.40
 -11   1  10   56.29   32.30
 -11   1  10  107.59   32.60
  11  -1 -10  104.39   35.00
  11  -1 -10   58.99   42.30
  11  -1 -10   49.20   36.60
 -10   1  10  127.49   32.20
  10  -1 -10  206.68   39.30
  10  -1 -10   90.99   36.60
  10  -1 -10   56.29   41.90
  -9   1  10   14.40   23.20
   9  -1 -10   29.80   29.90
   9  -1 -10  -17.60   33.40
   9  -1 -10  -20.20   28.60
  -8   1  10   91.59   23.40
   8  -1 -10   61.89   35.40
   8  -1 -10   50.69   30.90
   8  -1 -10  100.49   31.50
  -7   1  10   48.90   18.90
   7  -1 -10   42.90   27.20
   7  -1 -10   -3.80   30.50
   7  -1 -10  -17.60   27.30
  -6   1  10  156.08   25.30
   6  -1 -10  166.68   39.40
   6  -1 -10  141.29   33.80
   6  -1 -10  166.58   35.90
  -5   1  10   28.60   15.20
   5  -1 -10   45.60   24.20
   5  -1 -10   66.09   27.00
   5  -1 -10   82.39   30.90
  -4   1  10   13.80   12.10
  -4   1  10    7.10   12.80
   4  -1 -10   -9.10   23.10
   4  -1 -10    4.60   24.20
   4  -1 -10   14.20   25.90
  -3   1  10  116.59   16.30
  -3   1  10   70.69   26.40
   3  -1 -10   35.10   27.50
   3  -1 -10   44.30   27.80
  -2   1  10  234.68   37.70
  -2   1  10  220.68   28.00
   2  -1 -10  219.68   37.90
   2  -1 -10  232.08   39.30
  -1   1  10   87.39   25.30
  -1   1  10   90.39   17.60
   1  -1 -10   91.59   25.80
   1  -1 -10   68.19   27.30
   0   1  10   48.80   23.60
   0   1  10   44.60   17.20
   0  -1 -10   70.79   27.40
   0  -1 -10   46.00   23.50
   0  -1 -10  101.29   22.10
   1   1  10  110.19   26.30
   1   1  10  109.19   21.90
  -1  -1 -10   66.89   23.90
  -1  -1 -10   68.09   25.30
  -1  -1 -10   68.79   31.20
   2   1  10  266.27   30.80
   2   1  10  224.78   37.80
   2   1  10  273.97   36.10
  -2  -1 -10  221.18   38.50
  -2  -1 -10  238.48   44.20
  -2  -1 -10  231.58   37.30
   3   1  10   73.29   14.90
   3   1  10   54.69   27.10
   3   1  10   93.89   25.40
  -3  -1 -10  112.29   32.80
  -3  -1 -10   61.59   28.10
  -3  -1 -10   76.29   23.60
   4   1  10   16.20   12.40
   4   1  10    5.90   12.80
   4   1  10   21.20   22.00
  -4  -1 -10   -6.70   28.10
  -4  -1 -10   20.70   28.90
  -4  -1 -10   13.00   21.10
   5   1  10   70.39   15.70
   5   1  10    4.90   23.90
  -5  -1 -10   65.99   22.60
  -5  -1 -10   92.59   33.80
  -5  -1 -10  -12.10   31.50
   6   1  10  180.38   32.50
   6   1  10  134.79   22.50
  -6  -1 -10  112.89   38.00
  -6  -1 -10  126.09   26.20
  -6  -1 -10  130.09   41.60
   7   1  10   20.50   17.60
   7   1  10   51.59   25.90
  -7  -1 -10   21.20   37.30
  -7  -1 -10   21.70   17.90
  -7  -1 -10    8.10   33.30
   8   1  10   43.20   20.70
   8   1  10   83.39   28.10
  -8  -1 -10   37.60   43.20
  -8  -1 -10   75.69   35.60
  -8  -1 -10   -4.40   40.00
   9   1  10   41.10   27.30
   9   1  10   -9.00   18.30
  -9  -1 -10  -14.20   43.90
  -9  -1 -10  -53.29   31.90
  10   1  10   55.79   37.30
  10   1  10   89.39   32.60
 -10  -1 -10  110.99   50.49
 -10  -1 -10  133.39   42.40
  11   1  10   -0.40   27.70
  11   1  10   10.70   35.70
 -11  -1 -10   79.99   52.59
 -11  -1 -10   81.29   43.10
  12   1  10   96.99   33.10
  12   1  10   14.40   35.50
 -12  -1 -10   87.69   57.39
 -12  -1 -10  -35.70   35.20
  13   1  10   32.30   31.30
  13   1  10   -8.60   38.10
 -13  -1 -10  -29.50   49.30
 -13  -1 -10   46.40   41.60
  14   1  10    6.10   31.50
  14   1  10   38.20   39.30
 -14  -1 -10   -1.60   42.00
 -14  -1 -10   63.89   59.09
  15   1  10    3.40   40.60
  15   1  10   14.90   40.70
 -15  -1 -10  -38.90   58.89
 -15  -1 -10   10.40   47.40
  16   1  10   79.09   49.90
  16   1  10   -9.00   42.60
  16   1  10   58.69   37.70
 -16  -1 -10   81.69   49.60
 -16  -1 -10  -16.10   66.09
  17   1  10   75.09   42.20
  17   1  10   30.80   56.89
 -17  -1 -10   63.19   75.89
  18   1  10  -59.29   44.50
  17  -1 -11   55.19   69.69
  17  -1 -11  -51.29   46.90
  16  -1 -11  -15.20   44.60
  16  -1 -11    5.70   53.99
  15  -1 -11  -15.90   49.30
  15  -1 -11   13.70   40.90
  14  -1 -11   21.20   37.00
  14  -1 -11  -33.30   46.80
 -13   1  11   26.80   31.50
  13  -1 -11   23.50   38.60
  13  -1 -11   62.19   46.10
 -12   1  11  -29.00   27.40
  12  -1 -11   28.60   44.10
  12  -1 -11   28.30   35.20
  12  -1 -11   23.80   34.80
 -11   1  11   35.20   28.20
  11  -1 -11   61.89   44.90
  11  -1 -11   23.20   33.50
  11  -1 -11   38.20   34.30
 -10   1  11    2.60   24.10
  10  -1 -11   20.30   33.90
  10  -1 -11  -23.60   31.30
  10  -1 -11  -34.60   36.60
  -9   1  11   24.40   23.30
   9  -1 -11   58.09   39.20
   9  -1 -11   43.30   33.50
   9  -1 -11   64.19   33.10
  -8   1  11   93.29   25.50
   8  -1 -11  195.68   44.80
   8  -1 -11  135.19   36.10
   8  -1 -11  130.89   35.70
  -7   1  11    7.00   16.30
   7  -1 -11    3.30   28.10
   7  -1 -11   13.90   26.80
   7  -1 -11   -9.50   31.60
  -6   1  11   50.09   16.20
   6  -1 -11   20.40   29.30
   6  -1 -11   76.09   34.80
   6  -1 -11   66.99   29.40
  -5   1  11   31.50   12.80
   5  -1 -11   39.70   27.90
   5  -1 -11   35.00   31.10
   5  -1 -11    6.70   27.40
  -4   1  11   45.50   12.10
  -4   1  11   11.90   11.60
  -4   1  11   36.50   24.50
   4  -1 -11   47.20   30.70
   4  -1 -11   -4.10   25.40
   4  -1 -11   19.20   26.20
  -3   1  11  122.19   17.80
  -3   1  11  116.19   28.90
   3  -1 -11   79.79   30.70
   3  -1 -11  135.29   32.60
  -2   1  11  125.59   19.00
  -2   1  11  133.99   30.80
   2  -1 -11  105.79   31.20
   2  -1 -11  121.89   32.00
  -1   1  11   91.99   18.00
  -1   1  11   89.89   26.40
   1  -1 -11   74.79   27.80
   1  -1 -11  122.69   30.90
   0   1  11   84.69   18.80
   0   1  11  108.79   26.40
   0  -1 -11   35.10   21.30
   0  -1 -11   57.19   25.80
   0  -1 -11   46.50   27.40
   1   1  11   96.69   22.00
   1   1  11  101.59   26.40
  -1  -1 -11  127.09   26.50
  -1  -1 -11   85.49   33.00
  -1  -1 -11   81.19   26.80
   2   1  11  132.69   28.20
   2   1  11  118.39   18.10
   2   1  11  106.59   23.80
  -2  -1 -11   74.19   27.60
  -2  -1 -11   85.79   28.70
  -2  -1 -11   86.09   35.70
   3   1  11  145.79   30.20
   3   1  11  125.79   19.10
  -3  -1 -11  103.39   29.00
  -3  -1 -11  127.29   32.20
  -3  -1 -11  149.49   38.90
   4   1  11   47.10   23.90
   4   1  11   43.50   14.20
  -4  -1 -11   36.90   23.20
  -4  -1 -11   66.59   32.90
  -4  -1 -11  108.59   32.00
   5   1  11    9.00   22.60
   5   1  11    9.60   13.60
  -5  -1 -11    4.90   32.60
  -5  -1 -11   15.70   21.60
  -5  -1 -11   11.70   32.30
   6   1  11   46.60   16.60
   6   1  11   59.79   26.20
  -6  -1 -11   53.39   34.40
  -6  -1 -11   45.50   22.20
  -6  -1 -11   36.00   35.90
   7   1  11   17.70   17.20
   7   1  11   22.60   25.10
  -7  -1 -11   65.89   41.70
  -7  -1 -11   16.30   19.80
  -7  -1 -11  -53.69   31.40
   8   1  11   87.09   23.00
   8   1  11   85.69   31.00
  -8  -1 -11  100.99   46.60
  -8  -1 -11   44.70   38.40
   9   1  11   77.69   31.00
   9   1  11   44.70   22.80
  -9  -1 -11  107.09   48.40
  -9  -1 -11   64.99   40.80
  10   1  11  -28.70   25.90
  10   1  11   -4.60   19.10
 -10  -1 -11  -20.50   47.40
 -10  -1 -11   32.80   41.30
  11   1  11   66.09   31.90
  11   1  11   -5.10   36.90
 -11  -1 -11  -39.00   49.40
 -11  -1 -11  -11.80   36.40
  12   1  11   21.00   36.40
  12   1  11   -9.10   29.40
 -12  -1 -11   -9.70   40.80
 -12  -1 -11   -4.50   50.29
  13   1  11    0.10   39.30
  13   1  11   -5.50   30.40
 -13  -1 -11  128.49   61.79
 -13  -1 -11  -16.80   42.40
  14   1  11  -46.20   28.90
  14   1  11    8.80   39.90
 -14  -1 -11   28.40   59.39
 -14  -1 -11  -69.49   44.70
  15   1  11  -58.59   38.40
  15   1  11  -69.79   38.60
 -15  -1 -11   13.90   66.99
 -15  -1 -11   -0.10   46.10
  16   1  11  -21.80   41.90
  16   1  11   20.70   49.20
 -16  -1 -11  -59.89   68.89
 -16  -1 -11   36.10   50.89
  17   1  11  109.69   44.20
  17   1  11 -145.49   54.49
 -17  -1 -11   72.49   85.49
  17  -1 -12  106.59   77.79
  17  -1 -12  -60.89   55.89
  16  -1 -12   95.39   66.69
  16  -1 -12  -38.30   44.30
  15  -1 -12   -5.90   41.20
  15  -1 -12  -22.00   52.89
  14  -1 -12  -34.80   47.80
  14  -1 -12  -23.20   38.20
  13  -1 -12   24.40   39.60
  13  -1 -12  -22.20   45.50
  12  -1 -12   52.49   37.00
  12  -1 -12   26.40   43.40
  12  -1 -12    3.80   36.80
 -11   1  12   20.20   25.00
  11  -1 -12    9.30   36.20
  11  -1 -12   26.60   35.70
  11  -1 -12  -48.60   40.40
 -10   1  12    3.90   23.00
  10  -1 -12   -9.60   33.90
  10  -1 -12   31.70   40.10
  10  -1 -12   33.50   34.30
  -9   1  12   -4.20   20.70
   9  -1 -12    1.30   32.30
   9  -1 -12   24.50   34.00
   9  -1 -12   11.40   38.80
  -8   1  12   29.40   19.40
   8  -1 -12   28.00   32.10
   8  -1 -12   12.20   33.00
   8  -1 -12   68.29   38.40
  -7   1  12   10.90   16.50
   7  -1 -12   76.79   33.30
   7  -1 -12   52.99   33.00
   7  -1 -12    1.20   35.60
  -6   1  12   54.19   15.20
   6  -1 -12   78.39   32.40
   6  -1 -12   86.29   30.20
   6  -1 -12   16.10   35.60
  -5   1  12   27.00   27.40
   5  -1 -12   41.60   28.90
   5  -1 -12   13.90   28.30
   5  -1 -12   32.40   33.10
  -4   1  12    1.60   24.00
   4  -1 -12   13.70   25.30
   4  -1 -12   22.70   27.70
  -3   1  12   12.60   24.30
   3  -1 -12   87.09   30.30
   3  -1 -12   20.60   24.80
  -2   1  12   65.79   14.00
  -2   1  12   54.79   26.10
   2  -1 -12   31.90   27.20
   2  -1 -12   24.60   28.60
  -1   1  12  112.99   28.20
  -1   1  12   76.99   18.30
   1  -1 -12  130.49   31.60
   1  -1 -12   93.09   31.60
   0   1  12  -16.00   22.30
   0   1  12   24.90   15.80
   0  -1 -12   10.20   25.40
   0  -1 -12   26.20   27.90
   0  -1 -12   23.90   20.70
   1   1  12  102.09   27.70
   1   1  12  129.89   23.10
  -1  -1 -12  102.89   31.30
  -1  -1 -12  108.79   27.60
   2   1  12   19.60   13.40
   2   1  12   37.20   19.60
   2   1  12   80.99   25.80
  -2  -1 -12   20.50   33.90
  -2  -1 -12   20.00   24.30
  -2  -1 -12   58.69   26.60
   3   1  12   27.60   12.40
   3   1  12   32.50   23.10
  -3  -1 -12   -5.30   31.40
  -3  -1 -12   14.40   23.90
  -3  -1 -12   56.09   28.10
   4   1  12   22.10   13.00
   4   1  12   -6.40   22.10
  -4  -1 -12  -24.80   28.20
  -4  -1 -12   -7.30   24.00
  -4  -1 -12   -4.70   30.50
   5   1  12   22.80   24.30
   5   1  12   40.40   13.90
  -5  -1 -12  -30.90   33.40
  -5  -1 -12   63.99   33.80
  -5  -1 -12   -3.50   23.10
   6   1  12   62.59   27.80
   6   1  12   57.39   17.30
  -6  -1 -12  116.99   41.40
  -6  -1 -12   21.80   36.90
  -6  -1 -12   34.10   25.30
   7   1  12   55.99   28.60
   7   1  12   13.90   17.30
  -7  -1 -12   13.30   41.60
  -7  -1 -12   49.50   36.60
  -7  -1 -12   18.40   22.80
   8   1  12   50.59   28.60
  -8  -1 -12   15.30   38.70
  -8  -1 -12   26.90   45.30
   9   1  12   24.00   22.90
   9   1  12  -10.50   26.70
  -9  -1 -12  -40.20   41.30
  -9  -1 -12    6.60   39.40
  10   1  12  -10.60   25.20
  10   1  12  -36.10   26.50
 -10  -1 -12  -24.40   48.00
 -10  -1 -12   56.59   41.90
  11   1  12  -10.40   38.60
  11   1  12   18.90   30.40
 -11  -1 -12   16.90   50.29
 -11  -1 -12   26.40   43.00
  12   1  12  -49.50   29.00
  12   1  12   58.79   41.20
 -12  -1 -12   84.69   57.09
 -12  -1 -12  -88.69   40.90
  13   1  12   14.20   33.70
  13   1  12  -10.50   36.10
 -13  -1 -12   39.10   59.69
 -13  -1 -12   36.60   48.30
  14   1  12  107.69   47.90
  14   1  12   -5.20   33.60
 -14  -1 -12   88.79   54.09
 -14  -1 -12   67.89   65.59
  15   1  12   57.29   49.00
  15   1  12   26.50   36.30
 -15  -1 -12  -73.49   69.39
 -15  -1 -12  -12.30   50.79
  16   1  12   56.59   48.40
  16   1  12  -40.70   51.19
 -16  -1 -12  -26.40   52.79
 -16  -1 -12  -13.30   72.79
  17   1  12  -65.39   38.10
  17   1  12   27.90   57.59
 -17  -1 -12  -85.39   85.09
  16  -1 -13  -49.00   45.80
  16  -1 -13  -24.20   68.09
  15  -1 -13  -22.00   57.49
  15  -1 -13  -16.00   43.00
  14  -1 -13   -3.80   40.90
  14  -1 -13 -100.89   48.30
  13  -1 -13  -14.30   40.20
  13  -1 -13   25.50   52.59
  12  -1 -13   12.90   36.30
  12  -1 -13  -59.79   35.50
  12  -1 -13   67.39   49.20
  11  -1 -13   53.99   46.60
  11  -1 -13   37.60   40.00
  11  -1 -13   93.59   40.20
  10  -1 -13  -66.29   33.90
  10  -1 -13  -43.10   34.80
  10  -1 -13  -16.10   41.00
   9  -1 -13  -21.30   32.80
   9  -1 -13   17.60   40.30
   9  -1 -13   63.89   36.20
  -8   1  13   10.70   17.00
   8  -1 -13   54.49   35.10
   8  -1 -13   72.69   40.40
   8  -1 -13   20.00   34.40
  -7   1  13   52.89   15.70
   7  -1 -13   67.19   40.50
   7  -1 -13   13.20   33.30
   7  -1 -13   21.80   34.00
  -6   1  13   25.10   30.30
   6  -1 -13   -2.00   31.20
   6  -1 -13  -11.80   34.80
   6  -1 -13  -27.20   29.30
  -5   1  13   19.30   28.20
   5  -1 -13    6.60   35.50
   5  -1 -13   30.20   31.30
   5  -1 -13   14.90   30.60
  -4   1  13  -12.40   25.30
   4  -1 -13   13.70   29.90
   4  -1 -13  -30.00   23.40
  -3   1  13   59.89   27.40
   3  -1 -13  -38.20   27.20
   3  -1 -13  -14.00   24.10
  -2   1  13    0.60   11.00
  -2   1  13   -9.40   23.40
   2  -1 -13  -19.60   27.40
   2  -1 -13   28.30   27.30
  -1   1  13   13.30   13.00
  -1   1  13   -3.00   23.00
   1  -1 -13    6.70   27.30
   1  -1 -13  -24.60   27.70
   0   1  13   11.70   24.30
   0   1  13  -15.30   14.30
   0  -1 -13  -17.60   26.60
   0  -1 -13   18.00   27.30
   1   1  13   12.50   23.00
   1   1  13   -8.80   16.00
  -1  -1 -13  -27.70   28.70
  -1  -1 -13  -21.90   22.20
  -1  -1 -13  -15.50   24.80
   2   1  13   12.70   23.20
   2   1  13   33.00   22.00
   2   1  13   24.50   13.50
  -2  -1 -13   -5.50   24.60
  -2  -1 -13   16.20   30.50
  -2  -1 -13   43.30   24.40
   3   1  13  -16.20   23.10
  -3  -1 -13  -20.90   24.30
  -3  -1 -13  -36.90   30.60
  -3  -1 -13   12.30   27.00
   4   1  13   20.60   13.00
   4   1  13   32.10   25.40
  -4  -1 -13   -5.30   35.00
  -4  -1 -13   11.90   25.70
  -4  -1 -13   -2.10   29.50
   5   1  13    7.70   13.20
   5   1  13   42.60   27.00
  -5  -1 -13   67.09   35.20
  -5  -1 -13   33.70   36.50
  -5  -1 -13   24.70   26.80
   6   1  13  -13.80   25.90
   6   1  13    8.50   14.80
  -6  -1 -13   30.60   25.90
  -6  -1 -13   26.50   37.90
  -6  -1 -13   -3.20   38.40
   7   1  13    5.70   16.50
   7   1  13   39.60   29.40
  -7  -1 -13   55.99   39.60
  -7  -1 -13   71.09   27.10
  -7  -1 -13   41.90   40.00
   8   1  13   16.50   29.50
  -8  -1 -13  -45.30   36.90
  -8  -1 -13   19.30   44.30
   9   1  13  -32.90   29.20
  -9  -1 -13   -7.40   44.40
  -9  -1 -13   62.59   44.90
  10   1  13   33.80   31.00
 -10  -1 -13   12.50   43.40
 -10  -1 -13  -14.80   47.10
  11   1  13   -4.80   37.40
  11   1  13   31.80   31.60
 -11  -1 -13   23.30   46.30
 -11  -1 -13   27.00   54.39
  12   1  13  -66.59   29.40
  12   1  13  105.69   43.40
 -12  -1 -13   13.90   56.29
 -12  -1 -13  -39.10   43.70
  13   1  13    8.00   34.20
  13   1  13  -29.90   40.20
 -13  -1 -13  -64.49   56.79
 -13  -1 -13   34.20   50.49
  14   1  13   32.90   36.30
  14   1  13   52.79   46.60
 -14  -1 -13   63.99   52.79
 -14  -1 -13   72.39   63.39
  15   1  13   34.80   38.30
  15   1  13   65.19   50.49
 -15  -1 -13   -8.00   69.99
 -15  -1 -13   51.19   58.79
  16   1  13   77.79   49.80
  16   1  13   14.10   59.09
 -16  -1 -13  -19.20   81.09
 -16  -1 -13  -23.60   60.79
  16  -1 -14   15.40   73.69
  16  -1 -14  -50.79   64.29
  15  -1 -14  -58.29   61.09
  15  -1 -14  -51.79   47.10
  14  -1 -14   64.79   58.39
  14  -1 -14   39.00   46.50
  13  -1 -14   17.40   41.30
  13  -1 -14   59.79   53.49
  12  -1 -14   74.49   50.39
  12  -1 -14   11.00   40.10
  12  -1 -14   60.09   42.50
  11  -1 -14   94.69   48.50
  11  -1 -14   59.79   42.00
  11  -1 -14  -18.50   38.80
  10  -1 -14   -2.50   37.20
  10  -1 -14   51.79   44.00
  10  -1 -14   -2.00   34.40
   9  -1 -14    6.10   42.80
   9  -1 -14  -22.20   30.70
   9  -1 -14  -65.49   34.00
   8  -1 -14  -13.60   35.20
   8  -1 -14  -12.20   29.10
   8  -1 -14  -27.80   40.50
  -7   1  14   29.20   32.60
   7  -1 -14   52.69   40.60
   7  -1 -14   65.99   34.80
   7  -1 -14   -1.30   34.60
  -6   1  14  -17.80   29.90
   6  -1 -14   34.70   39.00
   6  -1 -14   14.60   33.70
   6  -1 -14  -19.60   31.80
  -5   1  14   34.90   31.10
   5  -1 -14   65.19   35.20
   5  -1 -14   15.60   30.90
  -4   1  14   14.60   30.70
   4  -1 -14   62.29   31.40
   4  -1 -14   75.59   34.70
  -3   1  14   -6.30   26.20
   3  -1 -14   23.70   28.10
   3  -1 -14    0.90   30.60
  -2   1  14   -0.30   25.10
   2  -1 -14   24.00   30.90
   2  -1 -14   -8.10   27.80
  -1   1  14   18.90   13.40
  -1   1  14   52.09   26.40
   1  -1 -14   13.90   30.90
   1  -1 -14  -16.50   28.60
   0   1  14    4.50   25.20
   0   1  14    8.60   15.40
   0  -1 -14  -12.10   29.50
   0  -1 -14    9.20   28.00
   1   1  14   26.50   17.90
   1   1  14   52.99   26.80
  -1  -1 -14   20.60   27.80
  -1  -1 -14    8.60   31.20
  -1  -1 -14   46.40   25.80
   2   1  14  -14.30   24.60
   2   1  14   35.30   14.30
  -2  -1 -14   63.89   29.70
  -2  -1 -14   56.49   27.20
   3   1  14  -18.80   11.60
   3   1  14   38.20   26.90
  -3  -1 -14   10.60   28.00
  -3  -1 -14  -36.50   34.60
  -3  -1 -14  -13.00   25.70
   4   1  14   -3.80   24.60
  -4  -1 -14   -3.90   28.20
  -4  -1 -14   36.90   32.50
  -4  -1 -14   27.50   39.20
   5   1  14   39.70   28.90
   5   1  14   49.70   14.50
  -5  -1 -14   29.90   29.10
  -5  -1 -14   23.00   40.10
  -5  -1 -14    6.70   36.60
   6   1  14    6.70   28.50
  -6  -1 -14  -29.80   35.40
  -6  -1 -14   72.39   29.20
  -6  -1 -14   15.80   40.70
   7   1  14   61.09   30.00
  -7  -1 -14   35.40   42.20
  -7  -1 -14  -30.80   25.10
  -7  -1 -14   23.30   40.60
   8   1  14   -5.20   29.10
  -8  -1 -14   -5.60   42.20
  -8  -1 -14  -12.30   24.30
  -8  -1 -14    7.70   42.80
   9   1  14   -1.10   28.10
  -9  -1 -14  -32.90   43.40
  -9  -1 -14   38.80   44.60
  10   1  14    5.80   30.50
 -10  -1 -14   -8.00   44.80
 -10  -1 -14   48.90   52.49
  11   1  14   78.59   34.80
 -11  -1 -14   16.80   52.69
 -11  -1 -14  -21.40   45.70
  12   1  14   48.50   42.60
  12   1  14  -50.99   31.40
 -12  -1 -14  -27.30   48.60
 -12  -1 -14   27.50   59.79
  13   1  14   11.90   42.00
  13   1  14  -21.40   34.00
 -13  -1 -14  118.59   64.99
 -13  -1 -14   29.40   51.09
  14   1  14  -58.39   44.30
  14   1  14  -36.30   34.30
 -14  -1 -14  -57.49   62.99
 -14  -1 -14   29.20   57.29
  15   1  14  -35.50   53.69
  15   1  14  -36.10   35.80
 -15  -1 -14 -114.59   68.49
 -15  -1 -14   33.30   64.89
  16   1  14   64.79   77.49
 -16  -1 -14   26.30  101.79
 -16  -1 -14   32.80   78.39
  15  -1 -15  -71.69   68.39
  15  -1 -15  -69.79   53.19
  14  -1 -15   24.30   66.49
  14  -1 -15    4.70   45.30
  13  -1 -15    6.80   44.50
  13  -1 -15  -40.50   53.09
  12  -1 -15    1.00   39.80
  12  -1 -15  -35.90   47.70
  11  -1 -15  -86.99   38.50
  11  -1 -15    4.90   37.70
  11  -1 -15  -25.90   47.40
  10  -1 -15   68.79   42.70
  10  -1 -15  -13.40   39.10
  10  -1 -15    1.00   46.10
   9  -1 -15  -11.10   42.60
   9  -1 -15   19.50   39.30
   9  -1 -15    5.20   38.50
  -8   1  15   47.60   36.00
   8  -1 -15   40.10   43.40
   8  -1 -15   23.80   38.10
   8  -1 -15   29.90   37.90
  -7   1  15   42.80   34.90
   7  -1 -15  -15.10   34.90
   7  -1 -15    7.00   32.50
   7  -1 -15  -53.39   39.10
  -6   1  15   20.20   31.20
   6  -1 -15    9.60   35.00
   6  -1 -15   20.90   35.60
  -5   1  15   11.10   30.60
   5  -1 -15  -13.90   33.50
   5  -1 -15   31.50   31.40
  -4   1  15    2.90   30.90
   4  -1 -15    4.90   32.60
   4  -1 -15   62.09   37.10
  -3   1  15   48.60   30.80
   3  -1 -15   64.29   35.90
   3  -1 -15    4.00   28.50
  -2   1  15   43.50   30.20
   2  -1 -15   17.90   31.70
   2  -1 -15   52.39   34.90
  -1   1  15   37.90   14.10
  -1   1  15  -11.80   26.70
   1  -1 -15   55.59   33.70
   1  -1 -15   26.50   31.90
   0   1  15  103.89   22.00
   0   1  15  203.48   36.40
   0  -1 -15   71.19   37.50
   0  -1 -15  124.79   37.90
   1   1  15   31.80   19.50
   1   1  15   41.70   27.30
  -1  -1 -15   38.10   26.60
  -1  -1 -15   55.09   32.80
  -1  -1 -15    1.50   34.10
   2   1  15   26.40   27.30
   2   1  15    5.70   13.70
  -2  -1 -15   39.00   27.80
  -2  -1 -15   49.40   30.70
   3   1  15   33.50   27.50
  -3  -1 -15   68.99   31.70
  -3  -1 -15   10.60   29.70
  -3  -1 -15   31.60   39.20
   4   1  15   76.29   28.90
  -4  -1 -15   37.60   32.10
  -4  -1 -15    7.40   39.40
  -4  -1 -15   16.70   32.50
   5   1  15    1.50   28.00
  -5  -1 -15  -11.70   37.90
  -5  -1 -15   -8.30   34.80
  -5  -1 -15   -2.80   30.10
   6   1  15    0.00   28.60
  -6  -1 -15   -9.50   40.20
  -6  -1 -15  -30.00   28.30
  -6  -1 -15   36.90   39.40
   7   1  15   14.70   29.50
  -7  -1 -15  -52.69   40.50
  -7  -1 -15    5.90   28.90
  -7  -1 -15   -6.30   40.70
   8   1  15   25.00   30.90
  -8  -1 -15   72.89   44.60
  -8  -1 -15  -32.90   41.10
   9   1  15  -14.80   31.50
  -9  -1 -15  -43.50   46.10
  -9  -1 -15   73.39   48.50
  10   1  15   -4.10   32.20
 -10  -1 -15   60.59   51.79
 -10  -1 -15  -36.60   49.50
  11   1  15   43.80   35.20
 -11  -1 -15   67.99   58.59
 -11  -1 -15   34.00   52.29
  12   1  15  -10.60   34.20
  12   1  15  -10.80   44.40
 -12  -1 -15   47.70   63.29
 -12  -1 -15   46.70   51.69
  13   1  15   17.20   47.50
  13   1  15  -21.60   34.80
 -13  -1 -15  121.69   60.99
 -13  -1 -15    2.30   64.79
  14   1  15  -44.20   36.60
  14   1  15   57.59   52.89
 -14  -1 -15   -5.80   72.89
 -14  -1 -15  -81.09   53.59
  15   1  15  -33.70   41.70
  15   1  15  -86.49   60.19
 -15  -1 -15   30.20   81.49
 -15  -1 -15   79.19   70.69
  14  -1 -16    4.30   56.99
  14  -1 -16   59.19   70.49
  13  -1 -16   57.29   49.20
  13  -1 -16 -134.99   54.59
  12  -1 -16    0.50   47.70
  12  -1 -16   10.70   56.99
  11  -1 -16    9.70   51.19
  11  -1 -16   35.10   46.00
  11  -1 -16   21.80   44.00
  10  -1 -16   10.30   42.60
  10  -1 -16   79.79   51.29
  10  -1 -16    0.80   41.30
  -9   1  16  -13.80   35.70
   9  -1 -16   36.20   42.30
   9  -1 -16  -41.90   45.00
   9  -1 -16  -23.70   39.60
  -8   1  16  -16.80   35.60
   8  -1 -16  -50.99   35.90
   8  -1 -16  -27.30   37.80
   8  -1 -16   -3.20   45.40
  -7   1  16   49.40   38.00
   7  -1 -16   23.40   39.80
   7  -1 -16   47.80   36.20
  -6   1  16   35.80   31.70
   6  -1 -16  -19.30   34.70
   6  -1 -16   53.99   39.10
  -5   1  16   42.50   34.60
   5  -1 -16   16.80   31.70
   5  -1 -16    0.90   35.90
  -4   1  16   64.79   33.90
   4  -1 -16   42.70   34.20
   4  -1 -16   26.90   37.90
  -3   1  16    7.10   30.80
   3  -1 -16    2.30   35.70
   3  -1 -16   24.20   31.60
  -2   1  16    8.80   28.70
   2  -1 -16   17.30   35.40
   2  -1 -16   -7.10   33.30
  -1   1  16   40.70   29.10
   1  -1 -16  -64.09   31.60
   1  -1 -16   25.90   33.10
   0   1  16   -7.70   26.40
   0  -1 -16   25.90   36.00
   0  -1 -16   94.39   36.10
   1   1  16   30.60   28.00
  -1  -1 -16  100.29   36.50
  -1  -1 -16   21.70   26.80
  -1  -1 -16   38.40   37.10
   2   1  16  -13.30   14.00
   2   1  16   -7.80   27.30
  -2  -1 -16  -67.59   25.90
  -2  -1 -16   10.10   31.10
  -2  -1 -16  -26.10   34.30
   3   1  16    9.20   27.30
  -3  -1 -16   29.50   30.70
  -3  -1 -16   40.30   31.40
   4   1  16  -13.00   27.00
  -4  -1 -16   10.60   31.80
  -4  -1 -16   11.90   41.80
  -4  -1 -16   23.10   31.80
   5   1  16   27.70   30.40
  -5  -1 -16    0.00   36.40
  -5  -1 -16  -48.10   39.00
  -5  -1 -16   15.90   32.00
   6   1  16   12.30   31.30
  -6  -1 -16  -40.70   43.40
  -6  -1 -16   38.70   32.70
  -6  -1 -16  -20.30   39.80
   7   1  16   42.10   34.20
  -7  -1 -16   71.79   33.00
  -7  -1 -16   -0.10   43.10
  -7  -1 -16   60.39   49.10
   8   1  16   45.50   34.30
  -8  -1 -16   -2.80   46.30
  -8  -1 -16  -90.59   41.50
   9   1  16  -31.60   31.30
  -9  -1 -16    9.10   48.60
  -9  -1 -16  -48.90   44.70
  10   1  16    4.90   35.00
 -10  -1 -16   57.89   54.59
 -10  -1 -16  -81.39   42.80
  11   1  16   15.40   36.30
 -11  -1 -16  -60.49   50.69
 -11  -1 -16   31.20   55.59
  12   1  16   -3.10   47.40
  12   1  16   36.40   38.20
 -12  -1 -16  -23.70   52.89
 -12  -1 -16  -34.90   60.49
  13   1  16  -21.20   36.70
  13   1  16   26.30   53.29
 -13  -1 -16    4.40   64.69
 -13  -1 -16  108.99   67.89
  14   1  16   21.80   42.40
  14   1  16   13.20   60.49
 -14  -1 -16   27.50   70.49
 -14  -1 -16    4.30   75.89
  14  -1 -17  -94.99   79.39
  14  -1 -17    8.80   79.19
  13  -1 -17 -118.89   62.29
  13  -1 -17    2.70   54.59
  12  -1 -17  -42.70   47.50
  12  -1 -17    3.90   59.89
 -11   1  17  -41.80   42.70
  11  -1 -17    9.70   51.39
  11  -1 -17   32.60   57.99
  11  -1 -17   -4.80   44.30
 -10   1  17   15.10   41.00
  10  -1 -17   49.20   44.70
  10  -1 -17   31.00   45.40
  10  -1 -17   31.00   54.99
  -9   1  17    2.80   38.90
   9  -1 -17   66.79   46.10
   9  -1 -17   43.20   42.90
   9  -1 -17   27.10   51.89
  -8   1  17   -5.40   34.50
   8  -1 -17   29.50   42.00
   8  -1 -17   26.80   42.20
  -7   1  17   24.00   35.90
   7  -1 -17   49.30   40.60
   7  -1 -17   52.59   43.10
  -6   1  17   50.39   37.20
   6  -1 -17  -21.00   38.00
   6  -1 -17    6.60   38.70
  -5   1  17   -3.80   33.40
   5  -1 -17    9.80   38.40
   5  -1 -17   15.10   35.80
  -4   1  17  -36.10   30.70
   4  -1 -17   80.49   40.90
   4  -1 -17   28.70   34.80
  -3   1  17    9.80   31.70
   3  -1 -17   -3.40   37.50
   3  -1 -17    5.00   35.50
  -2   1  17   33.20   30.10
   2  -1 -17  -22.70   35.40
   2  -1 -17   -6.70   34.90
  -1   1  17  206.38   40.80
   1  -1 -17  125.49   40.50
   1  -1 -17   80.79   41.60
   0   1  17   15.70   28.10
   0  -1 -17   -8.50   34.80
   0  -1 -17   16.40   34.60
   1   1  17  120.79   35.30
  -1  -1 -17   76.09   42.00
  -1  -1 -17  120.19   40.80
   2   1  17   33.80   30.90
  -2  -1 -17   22.60   37.90
  -2  -1 -17  -56.89   31.70
  -2  -1 -17   14.50   30.20
   3   1  17   15.00   29.70
  -3  -1 -17  -29.70   30.70
  -3  -1 -17   -2.70   30.20
  -3  -1 -17   38.40   39.80
   4   1  17   39.20   29.10
  -4  -1 -17   30.60   35.20
  -4  -1 -17   50.39   35.00
   5   1  17  -39.20   29.00
  -5  -1 -17  -41.60   33.80
  -5  -1 -17  -56.49   31.70
   6   1  17   31.60   33.00
  -6  -1 -17  -50.49   37.70
  -6  -1 -17    4.40   43.40
  -6  -1 -17  -27.90   34.30
   7   1  17    3.30   31.90
  -7  -1 -17   -3.70   44.60
  -7  -1 -17    3.10   35.10
  -7  -1 -17    8.40   46.80
   8   1  17  -45.50   31.20
  -8  -1 -17   66.99   48.40
  -8  -1 -17   94.99   52.89
   9   1  17   50.09   35.60
  -9  -1 -17    1.90   49.30
  -9  -1 -17 -128.09   46.40
  10   1  17   -3.20   36.30
 -10  -1 -17   54.89   56.39
 -10  -1 -17   62.49   58.49
  11   1  17    9.60   35.50
 -11  -1 -17   71.79   60.19
 -11  -1 -17  -77.59   53.89
  12   1  17   83.49   42.10
 -12  -1 -17   19.00   62.79
 -12  -1 -17  -33.60   64.29
  13   1  17  -11.60   56.79
  13   1  17  -21.80   38.40
 -13  -1 -17   54.49   69.79
 -13  -1 -17  -21.40   63.19
  14   1  17  -14.00   72.09
 -14  -1 -17 -122.69   86.99
 -14  -1 -17   37.20  104.19
 -13   1  18  -17.90   69.59
  13  -1 -18   80.29   74.19
  13  -1 -18 -112.19   72.09
 -12   1  18   48.60   56.29
  12  -1 -18   38.10   69.89
  12  -1 -18   49.40   54.99
 -11   1  18   36.90   51.49
  11  -1 -18  -84.49   58.59
  11  -1 -18   -8.70   44.70
 -10   1  18  -40.10   41.30
  10  -1 -18   97.29   52.69
  10  -1 -18  -83.09   37.70
  -9   1  18   53.29   43.00
   9  -1 -18  -36.40   41.90
   9  -1 -18   84.49   49.60
  -8   1  18  -10.90   38.60
   8  -1 -18   34.70   45.60
   8  -1 -18   51.49   44.20
  -7   1  18    8.90   38.60
   7  -1 -18   45.10   44.30
   7  -1 -18  -33.20   37.80
  -6   1  18   -7.10   34.40
   6  -1 -18   75.29   45.50
   6  -1 -18   19.30   40.80
  -5   1  18  -34.20   32.80
   5  -1 -18   58.99   41.70
   5  -1 -18   14.90   38.50
  -4   1  18   -4.30   30.80
   4  -1 -18  -35.30   34.70
   4  -1 -18   -6.70   39.20
  -3   1  18  -16.90   32.10
   3  -1 -18   12.00   38.60
   3  -1 -18  -11.90   37.80
  -2   1  18  136.79   39.40
   2  -1 -18   34.00   40.30
   2  -1 -18   44.90   42.50
  -1   1  18   91.79   35.50
   1  -1 -18   24.90   39.30
   1  -1 -18  -14.00   36.50
   0   1  18   -7.40   29.30
   0  -1 -18   49.50   41.90
   0  -1 -18  -11.60   36.70
   1   1  18   57.39   32.10
  -1  -1 -18   76.69   44.10
  -1  -1 -18    0.60   37.90
   2   1  18   97.49   34.70
  -2  -1 -18   78.69   44.30
  -2  -1 -18   29.30   38.20
   3   1  18   17.70   30.00
  -3  -1 -18   28.70   32.50
  -3  -1 -18   89.49   44.60
  -3  -1 -18  -43.00   32.50
   4   1  18  -28.20   28.20
  -4  -1 -18   11.60   36.20
  -4  -1 -18   11.70   34.70
   5   1  18  -33.60   30.60
  -5  -1 -18   57.49   38.40
  -5  -1 -18   33.10   37.90
   6   1  18  -54.39   31.30
  -6  -1 -18   19.30   35.20
  -6  -1 -18   24.70   42.50
   7   1  18   22.20   35.70
  -7  -1 -18  -29.80   44.50
   8   1  18   38.40   36.40
  -8  -1 -18  -27.20   49.60
  -8  -1 -18  -38.40   48.60
   9   1  18   61.89   38.40
  -9  -1 -18  -31.80   49.80
  -9  -1 -18  -18.40   52.29
  10   1  18  -19.60   36.10
 -10  -1 -18   54.79   59.39
 -10  -1 -18  -28.40   58.49
  11   1  18   38.40   41.20
 -11  -1 -18   12.40   60.09
 -11  -1 -18   86.59   63.39
  12   1  18    4.20   41.50
 -12  -1 -18  -62.39   66.39
 -12  -1 -18   21.20   65.89
  13   1  18  -23.90   48.60
 -13  -1 -18  147.69   80.29
 -12   1  19   85.19   73.49
  12  -1 -19   23.50   68.79
 -11   1  19   29.00   54.59
  11  -1 -19   10.00   58.19
 -10   1  19   64.19   52.19
  10  -1 -19   25.00   52.49
  10  -1 -19   69.39   56.49
  -9   1  19    0.40   45.90
   9  -1 -19   52.49   52.19
   9  -1 -19   13.40   46.90
  -8   1  19  -25.80   40.90
   8  -1 -19  -41.30   42.00
   8  -1 -19   72.39   49.60
  -7   1  19   -1.70   39.30
   7  -1 -19  -24.10   44.10
   7  -1 -19   24.50   44.60
  -6   1  19  -28.30   36.10
   6  -1 -19    6.70   43.20
   6  -1 -19  -26.10   42.70
  -5   1  19  -24.00   33.90
   5  -1 -19   25.00   42.80
   5  -1 -19  -26.10   41.20
  -4   1  19   -6.70   35.90
   4  -1 -19   -4.40   40.80
   4  -1 -19   -6.50   39.40
  -3   1  19    1.30   33.10
   3  -1 -19   12.80   41.80
   3  -1 -19    9.20   42.80
  -2   1  19   36.70   34.50
   2  -1 -19   23.00   42.40
   2  -1 -19   35.20   43.20
  -1   1  19   11.70   33.40
   1  -1 -19   21.10   38.80
   1  -1 -19  -16.60   39.10
   0   1  19   -2.90   31.60
   0  -1 -19   30.30   41.60
   0  -1 -19  -18.40   36.60
   1   1  19   33.90   33.20
  -1  -1 -19    5.10   36.80
  -1  -1 -19   -8.40   38.70
   2   1  19   71.59   34.50
  -2  -1 -19  -27.70   41.50
  -2  -1 -19   75.19   41.50
   3   1  19   -6.00   31.30
  -3  -1 -19  -15.80   37.20
  -3  -1 -19   48.80   42.20
   4   1  19   15.40   33.60
  -4  -1 -19  -39.80   37.80
  -4  -1 -19  -55.19   40.60
   5   1  19   65.79   35.80
  -5  -1 -19   22.80   41.10
  -5  -1 -19   50.09   58.09
   6   1  19  -36.90   34.00
  -6  -1 -19  -47.90   38.50
  -6  -1 -19   12.30   39.20
   7   1  19   65.99   39.00
  -7  -1 -19   46.90   47.70
   8   1  19   48.70   39.10
  -8  -1 -19   -6.10   50.49
   9   1  19   21.50   39.00
  -9  -1 -19  -45.00   53.39
  10   1  19   21.90   38.90
 -10  -1 -19  -20.80   57.79
  11   1  19   12.50   42.20
 -11  -1 -19  -67.59   63.09
  12   1  19   -9.80   49.60
 -12  -1 -19  -82.39   72.79
 -11   1  20   24.50   80.79
  11  -1 -20  -40.40   79.39
 -10   1  20  -98.89   49.50
  10  -1 -20   78.29   64.79
  -9   1  20   31.20   52.29
   9  -1 -20   52.89   50.99
   9  -1 -20   31.00   59.99
  -8   1  20  -14.60   45.40
   8  -1 -20  111.99   55.69
   8  -1 -20  -43.70   49.10
  -7   1  20   67.49   42.90
   7  -1 -20   -1.00   47.80
   7  -1 -20  -81.89   45.50
  -6   1  20   -4.00   38.60
   6  -1 -20  -28.50   46.60
   6  -1 -20   38.60   49.50
  -5   1  20  -88.19   33.80
   5  -1 -20   -3.60   44.00
   5  -1 -20  -27.20   46.20
  -4   1  20   26.30   37.50
   4  -1 -20    1.20   42.90
   4  -1 -20  -12.90   44.10
  -3   1  20    6.80   36.90
   3  -1 -20   97.09   48.40
   3  -1 -20   48.70   46.40
  -2   1  20   59.09   37.40
   2  -1 -20   31.00   45.90
   2  -1 -20  -22.40   41.10
  -1   1  20  -43.20   32.00
   1  -1 -20  -59.29   40.50
   1  -1 -20   22.50   43.50
   0   1  20   42.80   35.20
   0  -1 -20   -2.90   40.60
   0  -1 -20  -55.49   41.30
   1   1  20  -11.20   31.30
  -1  -1 -20   -6.90   39.70
  -1  -1 -20   -2.10   44.00
   2   1  20   46.20   33.60
  -2  -1 -20  -72.69   40.80
  -2  -1 -20   -0.10   42.10
   3   1  20   16.90   34.20
  -3  -1 -20  -18.80   43.50
  -3  -1 -20    9.00   40.60
   4   1  20   18.40   34.30
  -4  -1 -20    2.00   45.70
  -4  -1 -20    2.20   42.20
   5   1  20   62.79   37.50
  -5  -1 -20  117.39   52.99
  -5  -1 -20  -77.79   41.90
   6   1  20   -7.20   37.70
  -6  -1 -20  -63.69   48.40
   7   1  20   12.50   37.00
   8   1  20  129.19   46.00
   9   1  20   52.29   43.70
  -9  -1 -20   36.70   81.79
  10   1  20  -64.39   42.00
 -10  -1 -20  -32.90   61.19
  11   1  20  -49.20   57.29
 -11  -1 -20  -13.50   72.09
  -9   1  21   -1.50   57.79
   9  -1 -21   30.50   65.09
   9  -1 -21    1.50   61.59
  -8   1  21  -93.39   44.40
   8  -1 -21   17.30   57.99
   8  -1 -21   25.40   61.79
  -7   1  21   18.70   48.00
   7  -1 -21   -3.40   51.19
   7  -1 -21  -50.89   47.70
  -6   1  21  -16.80   42.30
   6  -1 -21   66.19   57.39
   6  -1 -21   10.10   50.79
  -5   1  21  -47.20   39.40
   5  -1 -21   13.40   47.60
  -4   1  21   -1.00   40.20
   4  -1 -21   12.70   49.10
   4  -1 -21  -24.60   49.90
  -3   1  21   50.99   40.60
   3  -1 -21  124.49   52.59
   3  -1 -21   58.29   50.39
  -2   1  21   -6.00   36.80
   2  -1 -21    6.20   44.80
   2  -1 -21  -27.80   46.70
  -1   1  21  -24.00   33.40
   1  -1 -21  -90.39   40.70
   1  -1 -21  -16.80   45.30
   0   1  21   -1.70   36.50
   0  -1 -21  -12.90   42.50
   0  -1 -21  -51.29   45.30
   1   1  21  -15.30   34.30
  -1  -1 -21   14.00   45.20
  -1  -1 -21  -43.40   48.00
   2   1  21  -37.10   32.80
  -2  -1 -21    0.50   46.60
  -2  -1 -21   94.99   57.09
   3   1  21   40.70   38.10
  -3  -1 -21   -7.10   48.80
  -3  -1 -21   43.50   47.40
   4   1  21   13.40   35.10
  -4  -1 -21   38.10   46.50
  -4  -1 -21   30.10   51.59
   5   1  21   -2.90   37.30
  -5  -1 -21   -7.20   53.39
  -5  -1 -21   -4.40   54.49
   6   1  21  -53.79   36.00
  -6  -1 -21   52.89   65.19
   7   1  21   34.60   41.40
  -7  -1 -21  -30.80   65.19
   8   1  21  -36.40   41.80
  -8  -1 -21   25.40   71.19
   9   1  21   11.50   45.40
  -8   1  22  137.79   81.09
   8  -1 -22  -20.30   67.79
   8  -1 -22   33.20   82.59
  -7   1  22    9.60   55.89
   7  -1 -22  116.09   64.89
   7  -1 -22   62.09   61.39
  -6   1  22   21.30   48.80
   6  -1 -22  -11.60   57.99
   6  -1 -22  -36.10   53.69
  -5   1  22   84.99   50.09
   5  -1 -22   48.40   54.99
   5  -1 -22  -17.90   54.19
  -4   1  22   15.30   44.90
   4  -1 -22   95.79   56.39
   4  -1 -22   25.30   56.59
  -3   1  22  -13.90   41.80
   3  -1 -22  -39.80   48.50
   3  -1 -22  -15.60   53.09
  -2   1  22  -17.90   38.00
   2  -1 -22    0.00   49.30
   2  -1 -22   17.80   52.89
  -1   1  22   -2.90   37.80
   1  -1 -22  -59.69   51.49
   1  -1 -22   42.60   52.39
   0   1  22   -3.70   38.30
   0  -1 -22  107.69   55.79
   0  -1 -22   11.20   50.99
   1   1  22   40.00   39.10
  -1  -1 -22  -37.40   49.70
  -1  -1 -22  -26.60   53.19
   2   1  22   53.59   40.00
  -2  -1 -22   69.09   56.89
  -2  -1 -22  -47.60   44.90
   3   1  22  -26.40   36.30
  -3  -1 -22  -28.70   49.30
  -3  -1 -22   70.29   59.89
   4   1  22    4.20   39.10
  -4  -1 -22   25.50   64.69
  -4  -1 -22   37.20   50.89
   5   1  22   32.00   41.70
  -5  -1 -22  -10.00   60.49
   6   1  22  -14.40   38.30
  -6  -1 -22  -28.40   63.29
   7   1  22   10.00   43.60
  -7  -1 -22   14.70   72.59
   8   1  22   -3.50   57.49
  -6   1  23  -70.89   81.79
   6  -1 -23  -55.39   77.89
   6  -1 -23  -43.20   92.99
  -5   1  23  -39.50   56.19
   5  -1 -23  151.78   68.59
   5  -1 -23 -133.09   58.69
  -4   1  23   53.79   50.79
   4  -1 -23  -89.39   60.59
   4  -1 -23   -7.20   58.19
  -3   1  23  -28.60   47.20
   3  -1 -23   36.80   59.59
   3  -1 -23  -56.89   55.59
  -2   1  23  -72.39   40.50
   2  -1 -23   -8.90   57.79
   2  -1 -23   12.70   58.69
  -1   1  23   -4.10   43.30
   1  -1 -23   22.60   58.49
   1  -1 -23  -53.09   51.89
   0   1  23   33.80   45.70
   0  -1 -23   66.49   56.29
   0  -1 -23   21.80   59.69
   1   1  23  -43.80   38.50
  -1  -1 -23  -13.30   56.39
  -1  -1 -23   29.80   54.69
   2   1  23  -18.40   41.20
  -2  -1 -23  -53.39   56.79
  -2  -1 -23  -63.19   53.39
   3   1  23   38.80   42.50
  -3  -1 -23   56.49   58.19
  -3  -1 -23  -74.99   63.89
   4   1  23   54.89   46.30
  -4  -1 -23  -11.80   65.19
   5   1  23  -41.20   42.80
  -5  -1 -23   25.20   75.59
   6   1  23    2.40   78.29
  -6  -1 -23  -66.39   92.79
   2  -1 -24   50.79  100.39
   2  -1 -24  -50.49   76.79
  -1   1  24   32.80   66.79
   1  -1 -24 -122.89   67.59
   1  -1 -24   49.10   79.59
   0   1  24  -25.40   63.09
   0  -1 -24  -59.29   71.89
   0  -1 -24   48.90   65.59
   1   1  24   23.30   64.29
  -1  -1 -24  116.09   73.69
  -1  -1 -24   12.90   80.69
   2   1  24  -24.60   64.19
  -2  -1 -24   18.00   78.69
  -2   2 -24  -59.39   85.69
  -1   2 -24 -124.69   76.39
  -1   2 -24   36.80   76.09
   1  -2  24  -14.50   68.19
   0   2 -24  -56.19   66.79
   0   2 -24   44.10   79.09
   0  -2  24  -35.80   63.69
   1   2 -24   86.99   83.49
   1   2 -24  -32.10   81.49
  -1  -2  24   27.50   58.19
   2   2 -24   74.29  102.29
   2   2 -24   26.90   97.99
  -5   2 -23   87.39   85.19
   5  -2  23   75.19   46.50
  -4   2 -23   72.49   72.69
   4  -2  23   15.90   43.70
  -3   2 -23   -0.60   63.39
  -3   2 -23   88.39   55.49
   3  -2  23   38.00   42.80
  -2   2 -23   81.89   63.19
  -2   2 -23   27.10   55.29
   2  -2  23   22.10   42.10
  -1   2 -23   17.60   59.99
  -1   2 -23   93.79   57.19
   1  -2  23  -37.50   41.10
   0   2 -23   76.89   61.09
   0   2 -23   18.60   55.29
   0  -2  23    5.20   43.40
   1   2 -23   13.40   53.19
   1   2 -23  -31.50   54.19
  -1  -2  23  -19.30   42.20
   2   2 -23  178.08   64.69
   2   2 -23   28.50   58.19
  -2  -2  23   25.20   49.99
   3   2 -23   64.39   62.19
   3   2 -23   -1.40   57.59
  -3  -2  23  -11.80   46.50
   4   2 -23   22.70   55.59
   4   2 -23  -56.89   61.29
  -4  -2  23   57.79   53.99
   5   2 -23  -36.50   62.69
   5   2 -23  -23.10   58.49
  -5  -2  23    2.10   53.39
  -8   2 -22   58.49   85.99
   8  -2  22 -102.69   52.99
  -7   2 -22   14.30   71.89
   7  -2  22   -6.40   42.50
   6  -2  22   90.69   47.00
   5  -2  22   63.89   42.50
  -4   2 -22   10.40   44.60
  -4   2 -22  -45.70   57.49
   4  -2  22  -22.50   35.20
  -3   2 -22   12.80   45.60
  -3   2 -22  -49.80   57.09
   3  -2  22  -31.80   34.20
  -2   2 -22   19.70   55.39
  -2   2 -22   54.89   45.90
   2  -2  22   63.99   39.50
  -1   2 -22  -40.20   49.30
  -1   2 -22   40.40   49.60
   1  -2  22  -21.80   37.50
   0   2 -22   51.19   49.99
   0   2 -22  -21.00   49.99
   0  -2  22    3.20   38.60
   1   2 -22   28.10   51.79
   1   2 -22   95.39   53.29
  -1  -2  22  -30.60   36.90
   2   2 -22 -115.39   43.40
   2   2 -22  -60.99   46.00
  -2  -2  22   -0.40   38.60
   3   2 -22  -38.40   48.00
   3   2 -22  -25.10   51.19
  -3  -2  22  -22.50   40.30
   4   2 -22  -77.19   49.30
   4   2 -22   71.89   53.99
  -4  -2  22    1.10   45.10
   5   2 -22  127.49   56.79
  -5  -2  22   26.80   48.00
   6   2 -22   19.40   57.99
   6   2 -22 -102.49   51.19
  -6  -2  22  -37.60   46.70
   7   2 -22   22.40   65.09
   7   2 -22   10.40   55.09
  -7  -2  22   64.09   54.89
   8   2 -22  -32.90   75.99
  -9   2 -21   11.10   78.89
  -8   2 -21   -8.30   70.39
   8  -2  21    9.80   42.10
  -7   2 -21  -76.49   65.79
   7  -2  21   20.60   39.10
  -6   2 -21  -39.70   59.79
   6  -2  21   -3.90   38.40
  -5   2 -21   31.10   62.79
  -5   2 -21  -25.70   54.69
   5  -2  21   67.09   40.20
  -4   2 -21  -42.80   40.70
   4  -2  21  -38.20   32.70
  -3   2 -21   37.60   49.70
  -3   2 -21   30.50   43.40
   3  -2  21   63.59   37.50
  -2   2 -21   15.40   49.40
  -2   2 -21   70.29   46.50
   2  -2  21   31.40   36.70
  -1   2 -21  -71.59   39.70
  -1   2 -21  -22.20   45.40
   1  -2  21   -7.20   35.00
   0   2 -21  -22.60   43.00
   0   2 -21    7.20   45.00
   0  -2  21  -37.50   35.40
   1   2 -21   24.40   47.80
   1   2 -21   50.59   47.00
  -1  -2  21    2.50   39.10
   2   2 -21  -71.89   41.20
   2   2 -21  -91.39   41.50
  -2  -2  21    3.90   38.80
   3   2 -21   77.59   49.10
   3   2 -21  -45.90   44.00
  -3  -2  21   -4.00   38.10
   4   2 -21    7.40   50.59
   4   2 -21   -4.40   45.00
  -4  -2  21  -18.60   40.60
   5   2 -21   -0.60   45.30
   5   2 -21   62.59   52.19
  -5  -2  21  -13.90   41.20
   6   2 -21   30.90   52.29
   6   2 -21   32.40   52.59
  -6  -2  21   28.00   45.20
   7   2 -21   -9.60   57.19
   7   2 -21  -25.50   51.09
  -7  -2  21  -17.10   47.10
   8   2 -21   69.89   59.09
   8   2 -21   20.20   57.19
  -8  -2  21   23.00   54.99
   9   2 -21   39.70   65.79
  -9  -2  21  -85.69   54.29
 -11   2 -20  142.39  116.89
 -10   2 -20  -13.40   72.19
  -9   2 -20   86.69   70.29
   9  -2  20   24.10   41.20
  -8   2 -20  -11.50   64.89
   8  -2  20   36.20   40.00
  -7   2 -20   73.49   61.29
   7  -2  20   30.70   38.20
  -6   2 -20   72.89   58.79
   6  -2  20   -6.50   36.60
  -5   2 -20  -45.70   39.00
  -5   2 -20   -5.20   52.99
   5  -2  20   71.99   38.60
  -4   2 -20   68.89   56.09
  -4   2 -20  -16.40   38.20
   4  -2  20   -6.50   32.10
  -3   2 -20   40.30   39.60
   3  -2  20    6.10   33.10
  -2   2 -20  -62.19   42.90
  -2   2 -20   24.70   41.40
   2  -2  20  -33.50   31.60
  -1   2 -20   90.49   45.00
  -1   2 -20  -36.30   41.30
   1  -2  20   53.19   36.60
   0   2 -20   55.49   43.30
   0   2 -20    9.30   42.00
   0  -2  20  -26.40   32.20
   1   2 -20   45.70   44.20
   1   2 -20   74.29   45.10
  -1  -2  20  -43.10   31.90
   2   2 -20   17.90   44.10
   2   2 -20   31.30   43.60
  -2  -2  20   48.80   37.90
   3   2 -20  -38.20   40.50
   3   2 -20   -6.80   42.30
  -3  -2  20  -17.80   35.90
   4   2 -20  -48.90   40.10
   4   2 -20  -35.90   41.50
  -4  -2  20   -6.00   38.40
   5   2 -20  -50.29   42.00
   5   2 -20   13.80   41.60
  -5  -2  20  -13.20   37.80
   6   2 -20    2.80   43.10
   6   2 -20  -42.30   44.30
  -6  -2  20   24.40   41.20
   7   2 -20   62.69   47.80
   7   2 -20    5.30   43.60
  -7  -2  20  -75.69   41.00
   8   2 -20  -23.20   47.50
   8   2 -20  -19.20   49.10
  -8  -2  20   62.59   48.80
   9   2 -20  -42.80   51.29
  -9  -2  20   18.50   50.09
  10   2 -20   19.00   59.39
 -10  -2  20  -55.29   53.09
  11   2 -20   96.69  107.69
 -12   2 -19   69.29   81.69
 -12   2 -19  -21.80   67.29
 -11   2 -19   23.50   68.09
 -11   2 -19   95.79   67.29
 -10   2 -19   47.90   58.69
 -10   2 -19  -93.59   63.09
  10  -2  19  -32.80   36.90
  -9   2 -19   -0.80   60.09
  -9   2 -19  -67.79   50.09
   9  -2  19   59.19   40.10
  -8   2 -19   -3.60   53.89
  -8   2 -19  -51.89   48.80
   8  -2  19    1.70   35.80
  -7   2 -19   -8.40   63.49
  -7   2 -19  -17.20   52.49
   7  -2  19    4.10   34.80
  -6   2 -19    8.30   51.99
  -6   2 -19   66.09   39.90
   6  -2  19   91.99   37.20
  -5   2 -19   15.10   52.89
  -5   2 -19   32.80   38.50
   5  -2  19   18.10   34.00
  -4   2 -19   40.10   38.40
  -4   2 -19   -1.30   49.20
   4  -2  19   91.89   37.40
  -3   2 -19  -29.50   43.90
  -3   2 -19  -39.10   35.50
   3  -2  19  -37.00   30.80
  -2   2 -19   42.50   45.80
  -2   2 -19   69.29   38.00
   2  -2  19   48.10   34.90
  -1   2 -19   15.50   38.40
  -1   2 -19   22.10   44.10
   1  -2  19   31.10   34.10
   0   2 -19   15.40   38.00
   0   2 -19  -14.70   37.60
   0  -2  19   64.09   36.10
   1   2 -19  -51.59   39.20
   1   2 -19  -16.40   37.50
  -1  -2  19    6.60   33.70
   2   2 -19   61.09   44.20
   2   2 -19   17.20   40.70
  -2  -2  19   50.09   37.30
   3   2 -19   74.39   44.00
   3   2 -19    2.20   40.10
  -3  -2  19  -13.90   34.50
   4   2 -19  -50.69   40.10
   4   2 -19    1.10   41.80
  -4  -2  19    5.10   36.20
   5   2 -19  -89.49   36.20
   5   2 -19  -70.99   38.50
  -5  -2  19   18.80   39.30
   6   2 -19   25.50   43.70
   6   2 -19   34.50   40.00
  -6  -2  19  -59.89   36.40
   7   2 -19   19.20   46.40
   7   2 -19  -23.50   43.30
  -7  -2  19   16.20   40.10
   8   2 -19   47.20   46.00
   8   2 -19   -4.90   43.70
  -8  -2  19   21.40   42.00
   9   2 -19  -60.29   42.50
   9   2 -19   23.40   51.99
  -9  -2  19  -22.00   44.00
  10   2 -19   14.90   67.49
  10   2 -19    3.00   49.30
 -10  -2  19  -44.70   47.00
  11   2 -19   32.20   69.19
  11   2 -19   42.70   57.69
 -11  -2  19  -20.60   50.69
  12   2 -19   35.90   82.49
  12   2 -19 -105.69   74.39
 -12  -2  19   56.69   83.99
 -13   2 -18   55.19   83.39
 -13   2 -18   48.10   81.49
 -12   2 -18   40.30   72.99
 -12   2 -18    1.70   72.99
 -11   2 -18 -104.69   57.79
 -11   2 -18  -52.29   59.79
  11  -2  18   17.30   39.70
 -10   2 -18  -13.90   55.09
  10  -2  18  -10.30   36.70
  -9   2 -18   52.39   56.49
  -9   2 -18   51.39   54.69
   9  -2  18   33.10   37.40
  -8   2 -18  -32.70   47.90
  -8   2 -18  -27.00   50.59
   8  -2  18   32.30   36.00
  -7   2 -18   -8.20   43.50
  -7   2 -18  -52.79   47.10
   7  -2  18  -39.50   32.00
  -6   2 -18  -23.80   32.20
  -6   2 -18  -21.60   41.00
  -6   2 -18  -14.80   47.60
   6  -2  18   76.29   34.90
  -5   2 -18    6.50   45.30
  -5   2 -18   75.69   36.60
  -5   2 -18  -35.30   35.10
   5  -2  18    8.90   31.00
  -4   2 -18  -27.40   34.20
  -4   2 -18   10.70   41.40
  -4   2 -18   -0.60   43.60
   4  -2  18   21.00   31.10
  -3   2 -18   30.30   36.30
  -3   2 -18  -17.50   45.10
   3  -2  18   48.60   32.50
  -2   2 -18  -30.10   34.20
  -2   2 -18  -73.29   44.20
   2  -2  18   14.40   31.80
  -1   2 -18   41.80   43.30
  -1   2 -18   34.70   36.90
   1  -2  18   17.70   33.10
   0   2 -18  -17.40   37.20
   0   2 -18  -47.70   32.00
   0  -2  18   -9.00   29.90
   1   2 -18   44.10   40.10
   1   2 -18  -54.29   33.50
  -1  -2  18   17.80   32.70
   2   2 -18   32.60   41.00
   2   2 -18    4.80   38.40
  -2  -2  18   18.80   32.50
   3   2 -18   68.89   40.30
   3   2 -18   12.00   40.00
  -3  -2  18   39.90   34.20
   4   2 -18   -7.80   38.30
   4   2 -18   90.99   42.20
  -4  -2  18  -18.90   33.00
   5   2 -18  -23.60   37.70
   5   2 -18  -22.50   37.50
  -5  -2  18   78.89   38.50
   6   2 -18   61.89   42.30
   6   2 -18   54.19   41.80
  -6  -2  18   -5.00   35.60
   7   2 -18    1.20   40.20
   7   2 -18  -32.90   39.20
  -7  -2  18    0.40   36.30
   8   2 -18  -48.70   37.50
   8   2 -18  104.09   57.39
   8   2 -18   17.40   38.60
  -8  -2  18   53.09   40.20
   9   2 -18  -35.90   39.20
   9   2 -18  -19.20   42.90
   9   2 -18  113.59   56.79
  -9  -2  18  -60.09   37.40
  10   2 -18  -81.59   52.39
  10   2 -18    1.50   41.10
 -10  -2  18  -39.90   42.30
  11   2 -18  -31.00   47.70
  11   2 -18  -51.29   58.79
  12   2 -18   30.50   56.39
  12   2 -18  -98.69   63.39
  13   2 -18   60.29   77.69
  13   2 -18   39.20   80.39
 -14   2 -17    6.00  100.29
 -14   2 -17   70.79   98.19
 -13   2 -17  -17.40   67.49
 -13   2 -17  231.38   82.49
  13  -2  17  -27.10   60.49
 -12   2 -17   24.00   64.59
 -12   2 -17    1.20   65.49
 -11   2 -17   -4.00   60.19
 -11   2 -17   28.80   60.19
  11  -2  17  -12.60   34.10
 -10   2 -17  -31.10   51.69
 -10   2 -17   42.40   57.89
  10  -2  17  -21.00   33.60
  -9   2 -17   52.59   51.09
  -9   2 -17   81.69   53.99
   9  -2  17   -0.70   34.40
  -8   2 -17  -38.10   48.90
  -8   2 -17   22.70   47.00
   8  -2  17  -15.80   32.30
  -7   2 -17   93.69   46.00
  -7   2 -17   19.30   46.50
  -7   2 -17    7.50   34.40
   7  -2  17  -21.60   31.10
  -6   2 -17 -100.19   39.30
  -6   2 -17  -26.00   36.80
  -6   2 -17   -9.80   31.20
   6  -2  17   76.59   34.60
  -5   2 -17   19.00   45.80
  -5   2 -17   47.90   33.80
  -5   2 -17    0.00   36.70
   5  -2  17   41.30   32.20
  -4   2 -17  -23.10   31.30
  -4   2 -17  -50.29   30.40
  -4   2 -17    8.60   45.10
   4  -2  17    4.00   28.10
  -3   2 -17  -15.00   32.70
  -3   2 -17   38.40   44.60
  -3   2 -17   21.30   30.20
   3  -2  17   -4.70   28.60
   3  -2  17    4.20   20.00
  -2   2 -17   37.20   35.40
  -2   2 -17    9.70   40.90
  -2   2 -17   28.50   25.80
   2  -2  17   55.89   31.80
   2  -2  17   22.30   23.10
  -1   2 -17   12.50   42.80
  -1   2 -17  -28.10   32.80
   1  -2  17    4.20   28.50
   0   2 -17   39.60   37.20
   0   2 -17   37.40   37.20
   0  -2  17   33.90   31.10
   1   2 -17    0.00   36.20
   1   2 -17    6.20   34.40
  -1  -2  17  -94.69   25.40
   2   2 -17   66.59   39.00
   2   2 -17   36.50   37.30
  -2  -2  17   37.80   33.10
   3   2 -17   -6.10   36.50
   3   2 -17  -32.30   34.50
  -3  -2  17  -23.80   30.30
   4   2 -17   19.10   37.80
   4   2 -17    1.30   37.30
  -4  -2  17  -10.10   33.10
   5   2 -17   60.49   39.70
   5   2 -17  -38.60   34.50
  -5  -2  17  -15.40   32.50
   6   2 -17   38.20   38.60
   6   2 -17    4.60   38.40
  -6  -2  17   -3.30   34.90
   7   2 -17  107.09   40.30
   7   2 -17  -29.00   44.90
   7   2 -17   73.89   42.30
  -7  -2  17   26.50   36.90
   8   2 -17  -27.30   36.80
   8   2 -17   17.10   40.70
   8   2 -17    6.60   46.90
  -8  -2  17  -45.30   37.20
   9   2 -17    1.00   41.40
   9   2 -17  -66.19   44.40
   9   2 -17   34.50   42.30
  10   2 -17  -24.90   49.10
  10   2 -17   81.69   44.50
  11   2 -17  -47.00   40.70
  11   2 -17  -26.30   57.29
  12   2 -17   -6.60   49.20
  12   2 -17  -35.90   63.59
  13   2 -17  -32.00   53.69
  13   2 -17  -21.20   65.39
  14   2 -17 -175.38   80.29
 -14   2 -16  -63.39   66.79
 -14   2 -16   43.10   75.49
  14  -2  16   95.49   66.19
 -13   2 -16   30.00   70.09
 -13   2 -16 -107.49   56.59
  13  -2  16 -114.59   46.60
 -12   2 -16  -84.99   59.89
 -12   2 -16   91.89   60.39
  12  -2  16  -53.69   31.90
 -11   2 -16   12.80   53.99
 -11   2 -16    0.10   56.09
  11  -2  16   71.19   35.50
 -10   2 -16  152.08   61.39
 -10   2 -16 -125.89   46.10
  10  -2  16   42.50   32.60
  -9   2 -16  -36.70   47.60
  -9   2 -16    8.00   50.79
   9  -2  16  -31.00   30.30
  -8   2 -16   29.40   49.70
  -8   2 -16  -22.60   46.60
   8  -2  16   31.10   33.40
  -7   2 -16  -28.30   28.20
  -7   2 -16   -8.30   42.50
  -7   2 -16   58.49   46.90
   7  -2  16    3.70   31.30
  -6   2 -16   38.90   31.30
  -6   2 -16   -1.90   39.00
  -6   2 -16   41.60   44.60
   6  -2  16   -6.10   29.90
   6  -2  16   24.30   25.40
  -5   2 -16  -31.00   28.30
  -5   2 -16   51.39   45.30
  -5   2 -16  -16.80   33.10
   5  -2  16    6.00   18.80
   5  -2  16   36.90   29.30
  -4   2 -16   -3.20   30.90
  -4   2 -16    8.80   29.90
  -4   2 -16   10.90   42.20
   4  -2  16  -10.90   18.50
   4  -2  16   29.80   30.00
  -3   2 -16    4.70   27.90
  -3   2 -16   22.20   30.40
  -3   2 -16   94.59   46.70
   3  -2  16   37.80   20.80
   3  -2  16    4.00   27.20
  -2   2 -16   -3.80   31.00
  -2   2 -16   26.70   41.30
  -2   2 -16  -18.10   23.10
   2  -2  16   15.30   26.30
  -1   2 -16    5.60   20.70
  -1   2 -16   41.00   33.30
  -1   2 -16   38.00   39.40
   1  -2  16   -3.60   28.50
   0   2 -16   38.50   39.20
   0   2 -16   21.90   31.40
   0  -2  16    8.70   29.70
   1   2 -16   38.10   33.10
   1   2 -16   57.29   36.80
  -1  -2  16   53.79   31.50
   2   2 -16   60.39   35.80
   2   2 -16   25.70   36.00
  -2  -2  16  -40.50   26.20
   3   2 -16    6.10   34.40
   3   2 -16    4.10   33.70
  -3  -2  16    7.00   30.80
   4   2 -16   -5.40   33.10
   4   2 -16   56.39   36.90
  -4  -2  16  -24.10   29.80
   5   2 -16   16.20   36.20
   5   2 -16   20.00   35.20
  -5  -2  16   35.70   33.20
   6   2 -16   16.20   34.90
   6   2 -16   50.79   37.50
   6   2 -16    4.10   42.10
  -6  -2  16   23.40   34.30
   7   2 -16  -23.50   36.40
   7   2 -16   26.90   44.40
   7   2 -16   84.29   39.00
  -7  -2  16   87.59   37.90
   8   2 -16  -19.50   38.90
   8   2 -16  -15.10   38.30
   8   2 -16  -42.70   42.20
   9   2 -16   33.50   38.90
   9   2 -16   -7.30   46.40
   9   2 -16   -7.40   39.70
  10   2 -16   58.99   42.70
  10   2 -16  -18.40   37.60
  10   2 -16   13.50   49.80
  11   2 -16  -22.60   38.90
  11   2 -16  -75.19   48.80
  12   2 -16  -83.39   53.09
  12   2 -16   -6.60   44.20
  13   2 -16  -45.30   43.70
  13   2 -16   12.50   64.99
  14   2 -16   66.69   55.99
  14   2 -16   -1.40   69.49
 -15   2 -15    8.40   70.59
 -15   2 -15   24.40   84.29
  15  -2  15  -85.09   59.69
 -14   2 -15   64.99   73.89
 -14   2 -15   10.20   61.19
  14  -2  15    4.80   54.09
 -13   2 -15   60.09   65.69
 -13   2 -15  -11.00   53.79
  13  -2  15   16.80   37.10
 -12   2 -15  -52.09   49.90
 -12   2 -15   20.70   59.09
  12  -2  15   22.40   47.10
  12  -2  15   40.20   33.90
 -11   2 -15  132.69   58.79
 -11   2 -15   -3.80   45.80
  11  -2  15   13.70   32.00
 -10   2 -15   17.60   50.19
 -10   2 -15   30.80   48.70
  10  -2  15   16.00   31.20
  -9   2 -15  -68.19   44.60
  -9   2 -15   10.50   50.59
   9  -2  15   25.90   31.90
  -8   2 -15   17.70   47.70
  -8   2 -15   16.60   42.90
   8  -2  15    2.70   21.70
   8  -2  15    0.60   29.80
  -7   2 -15   16.90   43.20
  -7   2 -15   -9.60   41.80
  -7   2 -15  -35.90   26.70
   7  -2  15    0.90   21.00
   7  -2  15   48.80   31.10
  -6   2 -15  -59.29   38.30
  -6   2 -15   79.29   45.70
  -6   2 -15  -22.10   26.50
   6  -2  15  -54.29   26.60
   6  -2  15   -4.90   18.70
  -5   2 -15   29.70   29.10
  -5   2 -15  -31.70   37.50
  -5   2 -15   34.20   35.40
   5  -2  15   24.00   18.80
   5  -2  15    1.80   27.20
  -4   2 -15    9.20   29.00
  -4   2 -15  -12.20   38.20
  -4   2 -15  -41.50   29.10
   4  -2  15   -4.50   18.70
   4  -2  15  -43.10   23.70
  -3   2 -15  -19.50   26.90
  -3   2 -15    3.40   38.90
  -3   2 -15   24.90   30.40
   3  -2  15  -10.60   26.30
   3  -2  15   65.19   21.40
  -2   2 -15   11.00   37.00
  -2   2 -15  -21.80   23.50
  -2   2 -15   15.30   28.30
   2  -2  15    2.90   24.90
  -1   2 -15   23.90   20.50
  -1   2 -15   -7.10   28.10
  -1   2 -15    6.70   38.40
   1  -2  15    9.50   26.10
   0   2 -15    0.90   38.50
   0   2 -15    2.10   30.20
   0  -2  15   19.20   27.50
   1   2 -15    6.90   32.50
   1   2 -15   -7.40   34.00
   1   2 -15   23.60   29.00
  -1  -2  15   42.50   29.80
   2   2 -15  -27.10   31.20
   2   2 -15   -6.00   29.30
  -2  -2  15  -53.39   25.90
   3   2 -15  -28.20   30.80
   3   2 -15   16.30   27.70
  -3  -2  15   19.30   29.70
   4   2 -15    5.30   32.60
   4   2 -15   -7.60   31.60
  -4  -2  15   42.30   31.10
   5   2 -15   95.89   41.90
   5   2 -15  -11.30   32.40
   5   2 -15   35.80   35.20
  -5  -2  15   76.79   35.80
   6   2 -15  -35.30   31.70
   6   2 -15   52.79   42.00
   6   2 -15  -14.40   33.40
   7   2 -15  -14.70   41.00
   7   2 -15   16.20   35.00
   7   2 -15    7.10   35.70
   8   2 -15   42.90   42.60
   8   2 -15  -38.50   34.60
   8   2 -15   -0.60   34.70
   9   2 -15   62.89   45.90
   9   2 -15  -16.30   37.40
   9   2 -15  -48.40   33.50
  10   2 -15  -18.60   38.80
  10   2 -15  -65.09   42.60
  10   2 -15  112.19   39.20
  11   2 -15  -44.40   34.40
  11   2 -15   38.40   51.19
  12   2 -15   37.00   42.40
  12   2 -15  -35.00   49.20
  13   2 -15   40.10   58.99
  13   2 -15   -7.80   41.80
  14   2 -15   43.70   67.19
  14   2 -15  -70.39   46.00
  15   2 -15   21.20   54.99
  15   2 -15    0.20   73.69
 -16   2 -14   39.60   90.29
 -16   2 -14  -45.00   97.39
 -15   2 -14  107.29   77.89
 -15   2 -14   -6.20   60.19
  15  -2  14  -91.49   52.19
 -14   2 -14   21.30   66.69
 -14   2 -14   91.89   60.49
  14  -2  14  -48.60   49.10
 -13   2 -14   18.40   55.79
 -13   2 -14   -2.60   60.49
  13  -2  14   18.80   45.90
  13  -2  14   37.80   34.50
 -12   2 -14  -93.89   46.90
 -12   2 -14  -85.39   51.49
  12  -2  14  -20.50   38.90
  12  -2  14   17.90   32.00
 -11   2 -14   82.59   51.29
 -11   2 -14   61.89   53.89
  11  -2  14    4.10   30.30
  11  -2  14   15.80   37.60
 -10   2 -14  -63.99   39.70
 -10   2 -14   67.79   54.69
  10  -2  14   25.80   31.10
  10  -2  14   34.70   26.80
  -9   2 -14  -11.20   41.90
  -9   2 -14  -17.60   46.60
   9  -2  14   12.80   22.40
   9  -2  14  -26.60   26.90
  -8   2 -14   78.59   44.00
  -8   2 -14   36.20   25.40
  -8   2 -14  161.68   48.60
   8  -2  14   87.39   32.60
   8  -2  14   73.29   24.00
  -7   2 -14   79.39   43.90
  -7   2 -14   -2.40   41.20
  -7   2 -14   60.89   26.40
   7  -2  14   34.80   28.80
   7  -2  14   -6.80   21.10
  -6   2 -14   57.39   39.70
  -6   2 -14   -9.50   39.80
  -6   2 -14   -9.50   23.90
   6  -2  14  -35.60   19.10
   6  -2  14   24.70   28.10
  -5   2 -14   85.49   43.30
  -5   2 -14   43.50   36.80
  -5   2 -14    0.50   26.80
   5  -2  14    6.40   18.40
   5  -2  14   64.99   29.00
  -4   2 -14   42.80   29.80
  -4   2 -14   10.30   31.40
  -4   2 -14  129.09   42.70
   4  -2  14  108.19   29.90
   4  -2  14   70.89   21.60
  -3   2 -14  -22.90   33.40
  -3   2 -14  -17.80   25.90
  -3   2 -14   36.20   28.00
   3  -2  14   43.30   25.80
   3  -2  14   -7.40   18.50
  -2   2 -14   18.90   36.70
  -2   2 -14   53.69   28.20
  -2   2 -14  -19.30   22.20
   2  -2  14  -34.20   22.80
   2  -2  14   -2.10   18.00
  -1   2 -14   72.79   30.20
  -1   2 -14   74.79   39.10
  -1   2 -14  104.79   23.50
   1  -2  14  103.69   31.20
   0   2 -14   24.10   16.40
   0   2 -14   19.90   27.80
   0   2 -14   19.00   33.10
   0  -2  14   36.50   25.50
   1   2 -14   52.29   31.80
   1   2 -14   70.19   37.90
  -1  -2  14  171.68   33.00
   2   2 -14    7.60   27.40
   2   2 -14   15.00   29.50
  -2  -2  14  -31.30   26.80
   3   2 -14   19.10   30.70
   3   2 -14   -5.10   29.30
  -3  -2  14   -5.80   26.80
   4   2 -14   98.69   35.80
   4   2 -14   30.50   32.30
  -4  -2  14   80.59   33.60
   5   2 -14   78.89   34.20
   5   2 -14   26.40   32.00
   5   2 -14  -16.10   35.10
   6   2 -14  -39.80   26.30
   6   2 -14   16.00   31.90
   6   2 -14   29.40   38.80
   7   2 -14   77.79   43.00
   7   2 -14   57.49   34.80
   7   2 -14    2.80   29.40
   8   2 -14   85.79   46.30
   8   2 -14   69.79   36.90
   8   2 -14  147.99   40.10
   9   2 -14   71.29   39.90
   9   2 -14   14.00   43.60
   9   2 -14  -10.80   33.00
  10   2 -14   52.49   40.10
  10   2 -14  -47.30   42.40
  10   2 -14   63.69   35.80
  11   2 -14   46.50   39.30
  11   2 -14  -29.60   45.80
  12   2 -14  -27.60   47.00
  12   2 -14   70.69   42.10
  13   2 -14   74.99   55.29
  13   2 -14   -2.90   39.90
  14   2 -14  -62.79   38.30
  14   2 -14  -22.50   57.19
  15   2 -14  106.99   67.89
  15   2 -14   63.09   49.50
  16   2 -14   85.89   65.89
  16   2 -14   34.10   81.99
 -16   2 -13  144.59   89.29
 -16   2 -13   29.80   62.99
  16  -2  13  -80.59   54.79
 -15   2 -13  -71.69   66.39
 -15   2 -13   60.09   59.69
  15  -2  13   28.80   52.29
 -14   2 -13  -30.10   52.19
 -14   2 -13   11.00   65.49
  14  -2  13  -45.80   31.00
  14  -2  13  -43.00   43.90
 -13   2 -13  -11.10   49.00
 -13   2 -13   22.20   56.29
  13  -2  13    7.40   43.30
  13  -2  13   17.90   31.70
 -12   2 -13  -42.80   42.70
 -12   2 -13   27.00   54.89
  12  -2  13   34.70   41.00
  12  -2  13    5.80   31.30
  12  -2  13   -9.50   29.90
 -11   2 -13  -61.09   44.00
 -11   2 -13   72.29   52.89
  11  -2  13  -56.79   27.90
  11  -2  13  -40.30   25.30
 -10   2 -13   49.10   45.50
 -10   2 -13   72.19   52.79
  10  -2  13   52.39   30.60
  10  -2  13  -10.60   24.00
  -9   2 -13   49.10   48.90
  -9   2 -13   42.90   41.50
   9  -2  13   34.60   29.10
   9  -2  13   21.00   23.10
  -8   2 -13  -33.20   37.70
  -8   2 -13   85.79   47.30
  -8   2 -13   22.80   21.80
   8  -2  13   70.09   23.40
   8  -2  13   85.19   30.20
  -7   2 -13   47.10   23.70
  -7   2 -13   94.99   44.40
  -7   2 -13   39.50   40.30
   7  -2  13    7.30   20.60
   7  -2  13   14.60   27.20
  -6   2 -13  114.49   28.00
  -6   2 -13   84.39   44.70
  -6   2 -13   45.20   39.20
   6  -2  13   91.09   23.60
   6  -2  13   93.19   31.10
  -5   2 -13   34.10   34.50
  -5   2 -13   25.00   26.60
  -5   2 -13    8.50   38.10
   5  -2  13   43.70   19.60
   5  -2  13   63.09   27.30
  -4   2 -13   22.00   30.50
  -4   2 -13   48.20   38.80
  -4   2 -13   16.60   25.20
   4  -2  13  -22.40   16.90
   4  -2  13  -20.20   22.70
  -3   2 -13   62.79   27.90
  -3   2 -13   57.29   34.20
  -3   2 -13   50.39   28.40
   3  -2  13  159.58   30.00
   3  -2  13   53.89   21.10
  -2   2 -13  -45.80   20.90
  -2   2 -13  -23.80   31.80
  -2   2 -13  -13.50   24.30
   2  -2  13   -6.50   22.90
   2  -2  13   -8.50   17.20
  -1   2 -13  -21.40   24.10
  -1   2 -13   -7.10   18.80
  -1   2 -13  -25.00   31.60
   1  -2  13   26.40   23.80
   1  -2  13  -22.30   15.20
   0   2 -13   12.90   31.90
   0   2 -13    0.30   25.30
   0   2 -13    7.80   14.90
   0  -2  13   -2.60   23.10
   1   2 -13   11.30   26.80
   1   2 -13   22.60   30.70
  -1  -2  13    7.40   24.90
   2   2 -13  -16.00   25.80
   2   2 -13   48.90   30.00
  -2  -2  13  -36.60   23.00
   3   2 -13   50.39   31.20
   3   2 -13  106.69   33.10
  -3  -2  13  107.99   31.60
   4   2 -13  -22.70   27.80
   4   2 -13  -24.90   31.50
   4   2 -13   13.90   27.40
  -4  -2  13   19.10   27.10
   5   2 -13   47.00   31.10
   5   2 -13   34.10   35.70
   5   2 -13   76.39   32.10
   6   2 -13  105.99   39.40
   6   2 -13   37.40   32.80
   6   2 -13   92.09   33.40
   7   2 -13   68.89   34.80
   7   2 -13   23.20   40.20
   7   2 -13   86.89   33.80
   8   2 -13   64.89   32.80
   8   2 -13   42.10   42.00
   8   2 -13   38.40   33.20
   9   2 -13   88.29   34.20
   9   2 -13   42.60   34.60
   9   2 -13    5.00   39.80
  10   2 -13  -23.50   42.00
  10   2 -13   63.99   34.50
  10   2 -13   36.20   37.70
  11   2 -13  -31.20   32.30
  11   2 -13   15.60   44.10
  11   2 -13  -33.20   33.60
  12   2 -13  -57.89   43.40
  12   2 -13  -33.10   36.70
  13   2 -13   44.80   39.90
  13   2 -13   -7.20   47.90
  14   2 -13  -14.20   39.30
  14   2 -13 -113.89   45.60
  15   2 -13   50.69   63.09
  15   2 -13   31.50   45.70
  16   2 -13  -30.30   46.80
  16   2 -13  -29.60   69.79
 -17   2 -12   88.69   74.59
 -17   2 -12   35.20  105.29
 -16   2 -12   11.60   71.69
 -16   2 -12   49.30   60.89
  16  -2  12  -10.10   52.49
 -15   2 -12   -3.40   52.19
 -15   2 -12  -29.40   63.19
  15  -2  12   -4.10   32.20
  15  -2  12  -69.79   47.10
 -14   2 -12   20.20   61.39
 -14   2 -12   93.69   52.59
  14  -2  12   51.49   44.50
  14  -2  12    0.20   32.00
 -13   2 -12   -4.10   44.50
 -13   2 -12  128.79   61.19
  13  -2  12   -1.90   30.60
  13  -2  12    9.90   31.40
  13  -2  12   -7.00   38.60
 -12   2 -12   32.60   53.99
 -12   2 -12   22.40   45.80
  12  -2  12  -12.00   28.90
  12  -2  12  -33.60   27.80
  12  -2  12  -15.60   39.50
 -11   2 -12   26.00   46.90
 -11   2 -12  -39.10   47.10
  11  -2  12   19.00   26.80
  11  -2  12  -20.40   35.00
  11  -2  12   -9.30   27.70
 -10   2 -12  118.49   53.69
 -10   2 -12  112.59   47.60
  10  -2  12   78.49   30.10
  10  -2  12  -10.80   26.90
  -9   2 -12  192.28   53.19
  -9   2 -12  140.59   48.00
   9  -2  12  100.09   28.00
   9  -2  12   97.99   32.00
  -8   2 -12   43.80   41.20
  -8   2 -12   42.60   20.90
  -8   2 -12   87.39   44.10
   8  -2  12   37.20   22.10
   8  -2  12   67.89   28.70
  -7   2 -12  -10.50   38.60
  -7   2 -12    3.90   20.80
  -7   2 -12   22.20   39.10
   7  -2  12   24.70   20.90
   7  -2  12   45.10   26.50
  -6   2 -12   42.70   23.80
  -6   2 -12   62.59   37.10
  -6   2 -12   55.89   40.70
   6  -2  12   66.99   26.70
   6  -2  12   68.49   22.10
  -5   2 -12   72.99   24.60
  -5   2 -12   80.59   35.10
  -5   2 -12   27.50   36.90
   5  -2  12  112.59   28.20
   5  -2  12   71.39   21.80
  -4   2 -12  103.49   27.90
  -4   2 -12  135.99   40.70
  -4   2 -12   97.89   33.90
   4  -2  12   98.89   23.40
   4  -2  12  161.38   30.30
  -3   2 -12   21.30   33.00
  -3   2 -12   66.19   27.40
  -3   2 -12   35.20   24.20
   3  -2  12   33.60   19.60
   3  -2  12   25.50   23.30
  -2   2 -12    0.10   31.30
  -2   2 -12   -1.10   21.80
  -2   2 -12  -17.90   21.40
   2  -2  12   40.70   18.20
   2  -2  12    2.40   21.90
  -1   2 -12   49.99   20.50
  -1   2 -12   60.79   33.90
  -1   2 -12   39.20   26.30
   1  -2  12   82.79   19.10
   1  -2  12   63.19   24.70
   0   2 -12   66.29   16.90
   0   2 -12   64.99   31.50
   0   2 -12   69.99   27.80
   0  -2  12   81.69   25.90
   1   2 -12   47.30   32.80
   1   2 -12  112.79   30.00
  -1  -2  12   87.99   27.60
   2   2 -12   -9.90   24.30
   2   2 -12   54.59   28.70
   2   2 -12  -24.70   25.80
  -2  -2  12   49.20   25.10
   3   2 -12   34.60   25.10
   3   2 -12   39.30   31.50
   3   2 -12   64.39   27.90
  -3  -2  12   30.00   26.40
   4   2 -12   91.99   32.10
[truncated: 2,664,035 more chars]
